# Supplementary material for: Canine polarized macrophages express distinct functional and transcriptomic profiles
Source: Front Vet Sci. 2022 Nov 1;9:988981. doi: 10.3389/fvets.2022.988981 (PMC9663804; doi:10.3389/fvets.2022.988981)
Supplement: Supplemental Table S1 — Full protein coding gene list of RNA sequencing results; table includes DESEQ comparison results between M0, M1, and M2 macrophages with log2 fold change, FDR and p values for each comparison. [file Table_1.XLSX]

## Sheet: gene_list-31
Gene symbol	gene description	Ensembl ID	Gene name	Gene biotype	P-value (M1 vs. M0)	FDR step up (M1 vs. M0)	Ratio (M1 vs. M0)	Log2(Ratio) (M1 vs. M0)	Fold change (M1 vs. M0)	LSMean(M1) (M1 vs. M0)	LSMean(M0) (M1 vs. M0)	P-value (M2 vs. M0)	FDR step up (M2 vs. M0)	Ratio (M2 vs. M0)	Log2(Ratio) (M2 vs. M0)	Fold change (M2 vs. M0)	LSMean(M2) (M2 vs. M0)	LSMean(M0) (M2 vs. M0)	P-value (M2 vs. M1)	FDR step up (M2 vs. M1)	Ratio (M2 vs. M1)	Log2(Ratio) (M2 vs. M1)	Fold change (M2 vs. M1)	LSMean(M2) (M2 vs. M1)	LSMean(M1) (M2 vs. M1)
CCL13	C-C motif chemokine ligand 13	CCL13	CCL13	protein_coding	2.9371e-09	6.13987e-08	0.0161746	-5.95012	-61.8252	69.2664	4282.41	0.00251065	0.0339602	8.07925	3.01422	8.07925	34598.6	4282.41	3.84877e-19	2.49303e-17	499.501	8.96434	499.501	34598.6	69.2664
CALD1	caldesmon 1	CALD1	CALD1	protein_coding	2.95467e-08	5.03279e-07	0.079128	-3.65967	-12.6378	2.6673	33.7087	8.45531e-28	6.48099e-25	23.8493	4.57588	23.8493	803.928	33.7087	3.74616e-37	7.83118e-35	301.402	8.23554	301.402	803.928	2.6673
MS4A2	membrane spanning 4-domains A2	MS4A2	MS4A2	protein_coding	0.000130951	0.000936613	0.0761148	-3.71568	-13.138	15.2382	200.2	0.000236514	0.00517146	11.1892	3.48404	11.1892	2240.07	200.2	1.16016e-13	4.58647e-12	147.004	7.19971	147.004	2240.07	15.2382
HBEGF	heparin binding EGF like growth factor	HBEGF	HBEGF	protein_coding	0.000427844	0.00259471	0.0650973	-3.94126	-15.3616	22.6388	347.769	0.0068974	0.0715514	7.92125	2.98573	7.92125	2754.76	347.769	5.86439e-10	1.45002e-08	121.683	6.92699	121.683	2754.76	22.6388
CXCL6	C-X-C motif chemokine ligand 6	CXCL6	CXCL6	protein_coding	4.59776e-109	1.26871e-105	0.0104209	-6.58437	-95.9608	365.728	35095.6	0.32259	0.667883	1.22264	0.289995	1.22264	42909.1	35095.6	1.11234e-118	7.67346e-115	117.325	6.87437	117.325	42909.1	365.728
SELENOP	selenoprotein P	SELENOP	SELENOP	protein_coding	3.05731e-09	6.37187e-08	0.00957525	-6.70647	-104.436	15.3674	1604.91	0.994399	0.997912	1.00542	0.00779912	1.00542	1613.61	1604.91	2.93488e-09	6.63812e-08	105.002	6.71427	105.002	1613.61	15.3674
SCN2B	sodium voltage-gated channel beta subunit 2	SCN2B	SCN2B	protein_coding	2.36813e-16	1.36708e-14	0.0933782	-3.42077	-10.7091	215.038	2302.87	7.3343e-15	1.33147e-12	9.27863	3.21391	9.27863	21367.5	2302.87	5.29901e-57	2.81194e-54	99.3662	6.63468	99.3662	21367.5	215.038
NPNT	nephronectin	NPNT	NPNT	protein_coding	1.75088e-25	2.91047e-23	0.0723136	-3.78959	-13.8287	69.1608	956.401	1.71411e-15	3.58327e-13	6.86367	2.77898	6.86367	6564.42	956.401	2.58279e-73	2.37565e-70	94.9154	6.56857	94.9154	6564.42	69.1608
PRSS23	serine protease 23	PRSS23	PRSS23	protein_coding	3.60093e-09	7.45977e-08	0.00169053	-9.20831	-591.529	1.64853	975.154	0.0587698	0.287636	0.155802	-2.68222	-6.41841	151.931	975.154	2.92828e-05	0.000290851	92.1613	6.52609	92.1613	151.931	1.64853
THBS1	thrombospondin 1	THBS1	THBS1	protein_coding	1.8474e-22	2.29627e-20	0.00710084	-7.13779	-140.828	519.592	73173.3	0.395158	0.726225	0.649961	-0.621575	-1.53855	47559.8	73173.3	5.52967e-19	3.48369e-17	91.533	6.51622	91.533	47559.8	519.592
FCER2	Fc fragment of IgE receptor II	FCER2	FCER2	protein_coding	0.665719	0.784768	0.842053	-0.248017	-1.18757	43.3244	51.451	2.54369e-28	2.33969e-25	72.6027	6.18195	72.6027	3735.48	51.451	3.78771e-30	4.97706e-28	86.221	6.42997	86.221	3735.48	43.3244
FLRT2	fibronectin leucine rich transmembrane protein 2	FLRT2	FLRT2	protein_coding	1.79997e-21	1.95544e-19	0.105495	-3.24475	-9.47908	29.9476	283.876	1.23642e-23	6.31809e-21	8.33475	3.05914	8.33475	2366.03	283.876	1.84982e-77	2.12683e-74	79.0058	6.30389	79.0058	2366.03	29.9476
TIMP3	TIMP metallopeptidase inhibitor 3	TIMP3	TIMP3	protein_coding	0.929422	0.960398	0.925085	-0.112343	-1.08098	4.99307	5.39742	5.57251e-07	2.89037e-05	67.1793	6.06994	67.1793	362.595	5.39742	4.22649e-07	6.28371e-06	72.6196	6.18229	72.6196	362.595	4.99307
SLAMF6	SLAM family member 6	SLAMF6	SLAMF6	protein_coding	0.489604	0.646418	0.820177	-0.285993	-1.21925	24.7505	30.177	3.87132e-54	1.78042e-50	58.5503	5.8716	58.5503	1766.87	30.177	1.44622e-56	7.39017e-54	71.3874	6.1576	71.3874	1766.87	24.7505
CD209	CD209 molecule	CD209	CD209	protein_coding	0.0151424	0.0486311	7.89018	2.98006	7.89018	710.016	89.9873	1.21219e-06	5.7473e-05	61.9675	5.95344	61.9675	5576.29	89.9873	0.0151368	0.0610827	7.85375	2.97338	7.85375	5576.29	710.016
SOCS2	suppressor of cytokine signaling 2	SOCS2	SOCS2	protein_coding	1.02218e-18	8.05883e-17	0.0429404	-4.54152	-23.2881	6.30865	146.916	4.18781e-05	0.00127478	3.06165	1.61431	3.06165	449.807	146.916	2.46687e-33	4.2019e-31	71.3	6.15583	71.3	449.807	6.30865
PLA2G5	phospholipase A2 group V	PLA2G5	PLA2G5	protein_coding	6.33498e-16	3.48222e-14	30.5218	4.93177	30.5218	538.414	17.6403	4.15185e-21	1.54819e-18	53.7985	5.74949	53.7985	949.02	17.6403	0.158993	0.344781	1.76262	0.817724	1.76262	949.02	538.414
PLA2G2F	phospholipase A2 group IIF	PLA2G2F	PLA2G2F	protein_coding	1.67137e-16	9.77116e-15	33.1621	5.05146	33.1621	90.9746	2.74333	9.38564e-18	2.49026e-15	38.1881	5.25505	38.1881	104.762	2.74333	0.601503	0.774805	1.15156	0.203587	1.15156	104.762	90.9746
EREG	epiregulin	EREG	EREG	protein_coding	0.00143849	0.00709322	0.10174	-3.29705	-9.82902	1.33401	13.112	0.000135236	0.00332594	7.18092	2.84417	7.18092	94.156	13.112	1.44533e-09	3.37414e-08	70.5814	6.14122	70.5814	94.156	1.33401
CD1C	CD1c molecule	CD1C	CD1C	protein_coding	0.0210833	0.0629217	0.391734	-1.35205	-2.55275	1001.47	2556.5	7.31737e-15	1.33147e-12	23.5229	4.55599	23.5229	60136.2	2556.5	6.79677e-24	6.05e-22	60.0482	5.90805	60.0482	60136.2	1001.47
ACKR3	atypical chemokine receptor 3	ACKR3	ACKR3	protein_coding	4.68018e-33	1.17405e-30	0.0368239	-4.76321	-27.1563	169.817	4611.59	0.0084373	0.0819208	2.0472	1.03365	2.0472	9440.86	4611.59	3.96797e-48	1.52072e-45	55.5944	5.79687	55.5944	9440.86	169.817
EDN1	endothelin 1	EDN1	EDN1	protein_coding	0.00251342	0.0113104	16.7332	4.06464	16.7332	352.928	21.0915	9.69548e-05	0.00252871	37.8455	5.24205	37.8455	798.219	21.0915	0.377535	0.594413	2.26171	1.17741	2.26171	798.219	352.928
KANK2	KN motif and ankyrin repeat domains 2	KANK2	KANK2	protein_coding	0.0202733	0.0609523	0.12759	-2.97041	-7.83758	16.3856	128.423	0.0270461	0.180025	6.92876	2.7926	6.92876	889.815	128.423	6.5135e-06	7.65475e-05	54.3047	5.76301	54.3047	889.815	16.3856
ENSCAFG00000023298	#N/A	ENSCAFG00000023298	---	protein_coding	0.00408617	0.0168945	0.396876	-1.33324	-2.51968	6.39481	16.1129	1.26032e-39	1.73887e-36	20.3646	4.34799	20.3646	328.132	16.1129	3.66977e-41	1.0333e-38	51.3123	5.68123	51.3123	328.132	6.39481
NDP	norrin cystine knot growth factor NDP	NDP	NDP	protein_coding	0.00327011	0.0140554	0.147109	-2.76505	-6.7977	4.26596	28.9987	0.00110601	0.0178475	6.84302	2.77463	6.84302	198.439	28.9987	2.63152e-09	5.98139e-08	46.5168	5.53968	46.5168	198.439	4.26596
JAM3	junctional adhesion molecule 3	JAM3	JAM3	protein_coding	1.53147e-06	1.80202e-05	0.152028	-2.71759	-6.57775	8.66886	57.0216	1.66774e-08	1.19222e-06	6.81856	2.76947	6.81856	388.805	57.0216	7.11594e-23	5.77521e-21	44.8507	5.48706	44.8507	388.805	8.66886
IRF4	interferon regulatory factor 4	IRF4	IRF4	protein_coding	8.24632e-16	4.44432e-14	0.0628921	-3.99098	-15.9003	12.0731	191.966	0.000786307	0.0138173	2.7516	1.46027	2.7516	528.212	191.966	2.54921e-28	2.95558e-26	43.7511	5.45125	43.7511	528.212	12.0731
RALGPS2	Ral GEF with PH domain and SH3 binding motif 2	RALGPS2	RALGPS2	protein_coding	3.12129e-17	2.05069e-15	0.0953888	-3.39004	-10.4834	18.3406	192.272	1.71056e-08	1.21028e-06	3.96174	1.98614	3.96174	761.733	192.272	2.0349e-41	5.84908e-39	41.5326	5.37617	41.5326	761.733	18.3406
VCAN	versican	VCAN	VCAN	protein_coding	1.13575e-13	4.69161e-12	0.155647	-2.68365	-6.42479	296.645	1905.88	5.13572e-13	7.53804e-11	6.00996	2.58736	6.00996	11454.3	1905.88	3.21064e-48	1.26563e-45	38.6127	5.271	38.6127	11454.3	296.645
IL13RA2	interleukin 13 receptor subunit alpha 2	IL13RA2	IL13RA2	protein_coding	1.30436e-08	2.40591e-07	0.367921	-1.44253	-2.71797	47.77	129.838	7.78077e-65	5.36756e-61	14.0229	3.80971	14.0229	1820.7	129.838	6.29859e-102	1.73803e-98	38.1139	5.25224	38.1139	1820.7	47.77
ENSCAFG00000013035	#N/A	ENSCAFG00000013035	---	protein_coding	1.14936e-15	6.14641e-14	0.0841324	-3.5712	-11.886	358.561	4261.87	0.000169214	0.00396046	3.1791	1.66862	3.1791	13548.9	4261.87	6.82983e-32	1.02425e-29	37.7868	5.23981	37.7868	13548.9	358.561
CLNK	cytokine dependent hematopoietic cell linker	CLNK	CLNK	protein_coding	2.05619e-08	3.65583e-07	0.045487	-4.4584	-21.9843	6.24015	137.185	0.304373	0.652724	1.67354	0.7429	1.67354	229.585	137.185	5.82643e-11	1.64056e-09	36.7915	5.2013	36.7915	229.585	6.24015
LRP4	LDL receptor related protein 4	LRP4	LRP4	protein_coding	7.73548e-07	9.72893e-06	0.147139	-2.76475	-6.79631	275.724	1873.9	1.33701e-05	0.000482899	5.37452	2.42614	5.37452	10071.3	1873.9	1.67822e-20	1.19353e-18	36.5269	5.19089	36.5269	10071.3	275.724
ARHGAP6	Rho GTPase activating protein 6	ARHGAP6	ARHGAP6	protein_coding	0.00244201	0.0110364	0.382284	-1.38728	-2.61585	48.0474	125.685	1.46222e-17	3.53935e-15	13.654	3.77125	13.654	1716.1	125.685	4.64796e-30	5.99326e-28	35.7168	5.15853	35.7168	1716.1	48.0474
MPO	myeloperoxidase	MPO	MPO	protein_coding	0.364591	0.529938	2.4135	1.27113	2.4135	3.61346	1.49719	0.00138126	0.0213168	19.5408	4.28842	19.5408	29.2563	1.49719	0.0159925	0.063758	8.09646	3.01729	8.09646	29.2563	3.61346
GDA	guanine deaminase	GDA	GDA	protein_coding	0.00452225	0.018351	0.160539	-2.639	-6.22901	5.91085	36.8188	0.00367121	0.04555	5.71251	2.51413	5.71251	210.328	36.8188	2.29789e-08	4.34301e-07	35.5833	5.15313	35.5833	210.328	5.91085
FZD7	frizzled class receptor 7	FZD7	FZD7	protein_coding	2.50963e-05	0.00021736	0.112052	-3.15777	-8.92446	4.02796	35.9474	0.00398349	0.0485943	3.49989	1.80731	3.49989	125.812	35.9474	2.16074e-11	6.52337e-10	31.2346	4.96507	31.2346	125.812	4.02796
SCTR	secretin receptor	SCTR	SCTR	protein_coding	1.12877e-13	4.67675e-12	0.0273036	-5.19476	-36.6251	3.76584	137.924	0.615179	0.862397	0.823526	-0.280114	-1.21429	113.584	137.924	2.38872e-12	7.9224e-11	30.1617	4.91465	30.1617	113.584	3.76584
RAI14	retinoic acid induced 14	RAI14	RAI14	protein_coding	1.46421e-14	6.87135e-13	0.141493	-2.82119	-7.06747	49.0465	346.635	2.07678e-09	1.71577e-07	4.23454	2.0822	4.23454	1467.84	346.635	4.13052e-41	1.13978e-38	29.9274	4.9034	29.9274	1467.84	49.0465
GATA2	GATA binding protein 2	GATA2	GATA2	protein_coding	0.0326959	0.0890807	0.234559	-2.09198	-4.26332	4.99537	21.2969	0.00237479	0.032602	6.7698	2.75911	6.7698	144.176	21.2969	5.25188e-07	7.65964e-06	28.8618	4.85109	28.8618	144.176	4.99537
MMP1	matrix metallopeptidase 1	MMP1	MMP1	protein_coding	0.0204329	0.0613253	0.242587	-2.04343	-4.12223	137.284	565.918	0.00183791	0.0269476	6.66776	2.7372	6.66776	3773.4	565.918	5.74425e-08	1.0159e-06	27.4861	4.78063	27.4861	3773.4	137.284
GAP43	growth associated protein 43	GAP43	GAP43	protein_coding	8.6405e-10	1.98358e-08	0.0377076	-4.729	-26.5198	61.6153	1634.03	0.967487	0.990714	1.02182	0.0311375	1.02182	1669.68	1634.03	6.71297e-10	1.64802e-08	27.0984	4.76014	27.0984	1669.68	61.6153
STAC2	SH3 and cysteine rich domain 2	STAC2	STAC2	protein_coding	0.363347	0.528924	1.40506	0.490628	1.40506	14.944	10.6359	3.90778e-26	2.45071e-23	38.0505	5.24985	38.0505	404.7	10.6359	7.3326e-23	5.91625e-21	27.0812	4.75922	27.0812	404.7	14.944
RASSF6	Ras association domain family member 6	RASSF6	RASSF6	protein_coding	2.52359e-18	1.88205e-16	0.0471952	-4.40522	-21.1886	8.37946	177.549	0.462251	0.772039	1.23721	0.307087	1.23721	219.665	177.549	9.4996e-21	6.89821e-19	26.2147	4.7123	26.2147	219.665	8.37946
CYBRD1	cytochrome b reductase 1	CYBRD1	CYBRD1	protein_coding	2.01505e-14	9.20584e-13	0.122702	-3.02677	-8.14981	314.869	2566.12	2.64623e-05	0.00087136	3.1406	1.65104	3.1406	8059.15	2566.12	2.87285e-32	4.40408e-30	25.5953	4.67781	25.5953	8059.15	314.869
MRC1	mannose receptor C-type 1	MRC1	MRC1	protein_coding	2.36703e-05	0.000206174	0.192358	-2.37813	-5.19863	1355.33	7045.86	5.54807e-05	0.00159247	4.81038	2.26615	4.81038	33893.3	7045.86	1.51861e-16	7.93649e-15	25.0074	4.64428	25.0074	33893.3	1355.33
SLC7A8	solute carrier family 7 member 8	SLC7A8	SLC7A8	protein_coding	2.58088e-27	4.74778e-25	0.0172284	-5.85906	-58.0436	37.4956	2176.38	0.0175676	0.136169	0.421952	-1.24485	-2.36994	918.327	2176.38	1.60504e-17	9.03867e-16	24.4916	4.61422	24.4916	918.327	37.4956
FOXI2	forkhead box I2	FOXI2	FOXI2	protein_coding	0.0215038	0.0638589	0.516141	-0.954164	-1.93746	12.1157	23.4736	1.57614e-26	1.03553e-23	12.5497	3.64958	12.5497	294.586	23.4736	5.17733e-33	8.40371e-31	24.3144	4.60374	24.3144	294.586	12.1157
EFNB2	ephrin B2	EFNB2	EFNB2	protein_coding	0.00195329	0.00915093	0.246056	-2.02294	-4.06411	21.98	89.3293	4.18881e-05	0.00127478	5.97275	2.5784	5.97275	533.541	89.3293	1.3268e-12	4.57444e-11	24.2739	4.60134	24.2739	533.541	21.98
CXCR4	C-X-C motif chemokine receptor 4	CXCR4	CXCR4	protein_coding	1.30081e-21	1.43578e-19	0.0431879	-4.53323	-23.1546	1224.34	28349.1	0.91488	0.97678	1.03574	0.0506647	1.03574	29362.4	28349.1	4.62278e-22	3.56316e-20	23.9822	4.58389	23.9822	29362.4	1224.34
DMD	dystrophin	DMD	DMD	protein_coding	4.89468e-25	7.94493e-23	0.142116	-2.81486	-7.03649	225.512	1586.81	4.86636e-11	5.2454e-09	3.37346	1.75423	3.37346	5353.05	1586.81	2.54034e-63	1.84469e-60	23.7373	4.56909	23.7373	5353.05	225.512
FCER1A	Fc fragment of IgE receptor Ia	FCER1A	FCER1A	protein_coding	0.154458	0.289789	0.233618	-2.09778	-4.28049	79.971	342.315	0.103875	0.389927	5.24637	2.39132	5.24637	1795.91	342.315	0.00230279	0.0130694	22.457	4.4891	22.457	1795.91	79.971
PLXNA2	plexin A2	PLXNA2	PLXNA2	protein_coding	5.18139e-07	6.82134e-06	0.201916	-2.30817	-4.95254	112.687	558.085	2.03187e-06	9.0724e-05	4.44908	2.15351	4.44908	2482.97	558.085	2.47765e-22	1.95338e-20	22.0343	4.46168	22.0343	2482.97	112.687
S1PR3	sphingosine-1-phosphate receptor 3	S1PR3	S1PR3	protein_coding	2.69129e-05	0.000232364	0.128187	-2.96368	-7.80112	2.99441	23.3597	0.00730127	0.0743985	2.66301	1.41306	2.66301	62.2073	23.3597	3.08441e-10	7.92469e-09	20.7745	4.37674	20.7745	62.2073	2.99441
FN1	fibronectin 1	FN1	FN1	protein_coding	0.0743996	0.168295	0.170144	-2.55517	-5.87736	3920.53	23042.4	0.208116	0.553359	3.48862	1.80266	3.48862	80386.1	23042.4	0.00234377	0.0132566	20.5039	4.35782	20.5039	80386.1	3920.53
FZD9	frizzled class receptor 9	FZD9	FZD9	protein_coding	0.0171837	0.0538485	0.442712	-1.17556	-2.25881	43.556	98.3844	2.76032e-11	3.09628e-09	9.06837	3.18084	9.06837	892.186	98.3844	4.20167e-19	2.6963e-17	20.4837	4.3564	20.4837	892.186	43.556
KCNB1	potassium voltage-gated channel subfamily B member 1	KCNB1	KCNB1	protein_coding	0.00102505	0.0053228	0.106668	-3.22881	-9.37492	5.05655	47.4048	0.244833	0.592521	2.08973	1.06331	2.08973	99.0629	47.4048	1.19925e-05	0.000132368	19.591	4.29212	19.591	99.0629	5.05655
F13A1	coagulation factor XIII A chain	F13A1	F13A1	protein_coding	9.97215e-05	0.000739311	0.0758856	-3.72003	-13.1777	1293.55	17046	0.56035	0.8341	1.47072	0.556519	1.47072	25069.9	17046	7.6999e-06	8.94992e-05	19.3807	4.27655	19.3807	25069.9	1293.55
ZEB1	zinc finger E-box binding homeobox 1	ZEB1	ZEB1	protein_coding	0.458621	0.619502	0.814543	-0.295938	-1.22768	21.4814	26.3724	4.88427e-28	3.96402e-25	15.3493	3.9401	15.3493	404.797	26.3724	3.03539e-30	4.02685e-28	18.844	4.23604	18.844	404.797	21.4814
PKIB	cAMP-dependent protein kinase inhibitor beta	PKIB	PKIB	protein_coding	0.0476223	0.119295	0.409838	-1.28687	-2.43999	18.6612	45.5331	2.18542e-06	9.6642e-05	7.69981	2.94482	7.69981	350.597	45.5331	3.96883e-11	1.15767e-09	18.7875	4.2317	18.7875	350.597	18.6612
MAF	MAF bZIP transcription factor	MAF	MAF	protein_coding	7.25288e-36	2.22373e-33	0.110248	-3.18117	-9.07045	281.79	2555.96	0.000100904	0.00261242	1.96018	0.970989	1.96018	5010.15	2555.96	6.44676e-60	3.86721e-57	17.7797	4.15216	17.7797	5010.15	281.79
ENSCAFG00000029514	#N/A	ENSCAFG00000029514	---	protein_coding	5.04177e-05	0.000402787	11.752	3.55483	11.752	24.7568	2.10661	0.0501835	0.263263	3.47816	1.79833	3.47816	7.32712	2.10661	0.0201092	0.0761588	0.295963	-1.75651	-3.3788	7.32712	24.7568
GALR1	galanin receptor 1	GALR1	GALR1	protein_coding	4.91432e-13	1.8232e-11	0.274896	-1.86304	-3.63774	33.5028	121.875	4.43578e-26	2.66089e-23	4.879	2.28658	4.879	594.626	121.875	8.72357e-62	6.01796e-59	17.7485	4.14963	17.7485	594.626	33.5028
CLEC10A	C-type lectin domain containing 10A	CLEC10A	CLEC10A	protein_coding	4.42018e-20	4.1752e-18	0.101625	-3.29868	-9.84012	41.2142	405.552	0.0129638	0.110888	1.78502	0.835942	1.78502	723.92	405.552	9.92795e-31	1.3562e-28	17.5648	4.13462	17.5648	723.92	41.2142
STEAP2	STEAP2 metalloreductase	STEAP2	STEAP2	protein_coding	2.3473e-43	1.07952e-40	0.0433226	-4.52874	-23.0827	104.907	2421.53	0.198378	0.543583	0.753034	-0.409214	-1.32796	1823.5	2421.53	3.9541e-36	7.90647e-34	17.382	4.11952	17.382	1823.5	104.907
ENSCAFG00000042798	#N/A	ENSCAFG00000042798	---	protein_coding	0.000109996	0.000804244	5.99139	2.58289	5.99139	21.9114	3.65716	1.3178e-08	9.6711e-07	13.2309	3.72584	13.2309	48.3876	3.65716	0.0333709	0.113214	2.20833	1.14295	2.20833	48.3876	21.9114
PITPNC1	phosphatidylinositol transfer protein cytoplasmic 1	PITPNC1	PITPNC1	protein_coding	7.38981e-08	1.17598e-06	0.10276	-3.28265	-9.73142	19.3372	188.179	0.155675	0.480395	1.77212	0.825478	1.77212	333.476	188.179	1.53797e-11	4.75772e-10	17.2453	4.10813	17.2453	333.476	19.3372
ENSCAFG00000014612	#N/A	ENSCAFG00000014612	---	protein_coding	0.622003	0.752849	1.37218	0.456465	1.37218	5.47953	3.99332	1.1361e-07	6.64188e-06	23.5027	4.55476	23.5027	93.8539	3.99332	1.08981e-06	1.49613e-05	17.1281	4.09829	17.1281	93.8539	5.47953
TNNI1	troponin I1, slow skeletal type	TNNI1	TNNI1	protein_coding	7.57369e-23	9.76582e-21	0.115793	-3.11038	-8.6361	82.7198	714.376	0.00116538	0.0186529	1.97869	0.984548	1.97869	1413.53	714.376	1.6944e-38	3.77058e-36	17.0882	4.09493	17.0882	1413.53	82.7198
BATF3	basic leucine zipper ATF-like transcription factor 3	BATF3	BATF3	protein_coding	5.23823e-19	4.22643e-17	8.70114	3.1212	8.70114	380.709	43.7539	7.82209e-26	4.49673e-23	12.7784	3.67564	12.7784	559.105	43.7539	0.0940279	0.243486	1.46859	0.554432	1.46859	559.105	380.709
LFNG	LFNG O-fucosylpeptide 3-beta-N-acetylglucosaminyltransferase	LFNG	LFNG	protein_coding	4.42195e-10	1.08365e-08	0.169832	-2.55782	-5.88818	98.9395	582.574	0.000144227	0.00348494	2.88221	1.52718	2.88221	1679.1	582.574	1.85721e-23	1.61157e-21	16.971	4.085	16.971	1679.1	98.9395
MB21D2	Mab-21 domain containing 2	MB21D2	MB21D2	protein_coding	0.00251738	0.0113245	0.240661	-2.05493	-4.15523	25.7529	107.009	0.00217381	0.0305729	4.07455	2.02664	4.07455	436.014	107.009	1.66232e-09	3.83529e-08	16.9307	4.08157	16.9307	436.014	25.7529
TMEM64	transmembrane protein 64	TMEM64	TMEM64	protein_coding	8.18642e-50	5.37848e-47	0.0475203	-4.39531	-21.0436	18.9431	398.633	0.155328	0.479783	0.796857	-0.327607	-1.25493	317.653	398.633	1.48814e-42	4.56262e-40	16.7688	4.0677	16.7688	317.653	18.9431
COL13A1	collagen type XIII alpha 1 chain	COL13A1	COL13A1	protein_coding	6.44084e-05	0.000501775	0.148045	-2.7559	-6.75472	7.50752	50.7112	0.0389404	0.226884	2.44004	1.28691	2.44004	123.737	50.7112	3.60513e-09	7.90778e-08	16.4818	4.0428	16.4818	123.737	7.50752
CISH	cytokine inducible SH2 containing protein	CISH	CISH	protein_coding	0.000588946	0.00337607	0.326314	-1.61567	-3.06453	280.701	860.218	2.49331e-07	1.34903e-05	5.32302	2.41225	5.32302	4578.96	860.218	9.6996e-18	5.57606e-16	16.3126	4.02791	16.3126	4578.96	280.701
LYVE1	lymphatic vessel endothelial hyaluronan receptor 1	LYVE1	LYVE1	protein_coding	0.0162625	0.0515211	0.241872	-2.04769	-4.13443	19.6073	81.0649	0.0184365	0.140324	3.8948	1.96155	3.8948	315.731	81.0649	2.33215e-06	3.00155e-05	16.1027	4.00923	16.1027	315.731	19.6073
FGFR1	fibroblast growth factor receptor 1	FGFR1	FGFR1	protein_coding	0.0147259	0.047526	0.346968	-1.52713	-2.88211	42.1092	121.363	7.59683e-05	0.00208792	5.38124	2.42794	5.38124	653.087	121.363	2.16386e-10	5.65432e-09	15.5093	3.95507	15.5093	653.087	42.1092
SOX4	SRY-box transcription factor 4	SOX4	SOX4	protein_coding	2.34452e-11	6.91182e-10	0.0123356	-6.34102	-81.0659	3.88751	315.144	0.00509593	0.0583474	0.18979	-2.39752	-5.26898	59.8112	315.144	3.59825e-05	0.000348386	15.3855	3.9435	15.3855	59.8112	3.88751
IL1B	interleukin 1 beta	IL1B	IL1B	protein_coding	0.0024562	0.0110782	0.108591	-3.20303	-9.2089	239.701	2207.38	0.495654	0.794902	1.64681	0.719671	1.64681	3635.13	2207.38	0.00020786	0.00166832	15.1653	3.9227	15.1653	3635.13	239.701
ENSCAFG00000032731	#N/A	ENSCAFG00000032731	---	protein_coding	0.058127	0.139208	0.672433	-0.572537	-1.48714	17627.5	26214.5	3.10884e-28	2.68079e-25	10.0548	3.32981	10.0548	263582	26214.5	3.92321e-38	8.59182e-36	14.9529	3.90235	14.9529	263582	17627.5
KCNN3	potassium calcium-activated channel subfamily N member 3	KCNN3	KCNN3	protein_coding	0.0290094	0.0809609	0.173763	-2.52481	-5.75497	1.36271	7.84234	0.138861	0.45467	2.59194	1.37403	2.59194	20.3269	7.84234	0.000608681	0.00425073	14.9165	3.89884	14.9165	20.3269	1.36271
NSUN7	NOP2/Sun RNA methyltransferase family member 7	NSUN7	NSUN7	protein_coding	2.17955e-11	6.46694e-10	7.29793	2.86749	7.29793	70.936	9.72002	8.02109e-18	2.16994e-15	12.5287	3.64717	12.5287	121.779	9.72002	0.0271802	0.0964024	1.71675	0.779679	1.71675	121.779	70.936
EMR4	#N/A	EMR4	EMR4	protein_coding	7.99097e-24	1.16054e-21	0.107162	-3.22213	-9.33165	383.163	3575.55	0.0382829	0.22522	1.57752	0.657655	1.57752	5640.48	3575.55	8.38504e-34	1.48319e-31	14.7208	3.87979	14.7208	5640.48	383.163
PIP5K1B	phosphatidylinositol-4-phosphate 5-kinase type 1 beta	PIP5K1B	PIP5K1B	protein_coding	5.54945e-05	0.000438521	0.0772736	-3.69388	-12.941	2.01337	26.0551	0.820167	0.945271	1.12017	0.163717	1.12017	29.1861	26.0551	2.60232e-05	0.000262619	14.4962	3.8576	14.4962	29.1861	2.01337
CDH1	cadherin 1	CDH1	CDH1	protein_coding	0.763237	0.857523	0.870141	-0.200678	-1.14924	25.2979	29.0734	2.72982e-08	1.86452e-06	12.0806	3.59462	12.0806	351.224	29.0734	5.64857e-09	1.18801e-07	13.8835	3.7953	13.8835	351.224	25.2979
RGS4	regulator of G protein signaling 4	RGS4	RGS4	protein_coding	3.55861e-09	7.38317e-08	0.0426375	-4.55173	-23.4535	3.99037	93.5883	0.221269	0.568066	0.572317	-0.805114	-1.74728	53.5621	93.5883	1.36883e-06	1.83535e-05	13.4228	3.74662	13.4228	53.5621	3.99037
MEST	mesoderm specific transcript	MEST	MEST	protein_coding	3.44618e-07	4.73575e-06	0.126504	-2.98275	-7.9049	8.1672	64.5609	0.142493	0.461605	1.68537	0.753067	1.68537	108.809	64.5609	1.44966e-10	3.87617e-09	13.3227	3.73581	13.3227	108.809	8.1672
PHLDA1	pleckstrin homology like domain family A member 1	PHLDA1	PHLDA1	protein_coding	2.62522e-32	6.13902e-30	0.148011	-2.75622	-6.75624	78.1726	528.153	7.03406e-06	0.000280488	1.95002	0.963488	1.95002	1029.91	528.153	7.428e-58	4.27017e-55	13.1748	3.71971	13.1748	1029.91	78.1726
ENSCAFG00000049840	#N/A	ENSCAFG00000049840	---	protein_coding	0.00013936	0.000988053	0.0659449	-3.92259	-15.1642	1.33398	20.2287	0.773519	0.927859	0.858989	-0.219288	-1.16416	17.3762	20.2287	0.000349107	0.00260499	13.0259	3.70331	13.0259	17.3762	1.33398
S100P	S100 calcium binding protein P	S100P	S100P	protein_coding	0.000470289	0.00280527	0.301793	-1.72837	-3.31353	224.397	743.547	6.55687e-05	0.00185379	3.894	1.96125	3.894	2895.37	743.547	7.798e-14	3.12759e-12	12.9029	3.68962	12.9029	2895.37	224.397
CCL8	C-C motif chemokine ligand 8	CCL8	CCL8	protein_coding	0.00318234	0.0137596	7.52904	2.91247	7.52904	64882.6	8617.65	0.243719	0.591174	2.2208	1.15108	2.2208	19138.1	8617.65	0.0744448	0.205585	0.294964	-1.76139	-3.39024	19138.1	64882.6
PRKCQ	protein kinase C theta	PRKCQ	PRKCQ	protein_coding	0.064451	0.150692	0.516706	-0.952584	-1.93534	17.7903	34.4301	1.54608e-08	1.11799e-06	6.53991	2.70927	6.53991	225.17	34.4301	2.53087e-13	9.56669e-12	12.6569	3.66185	12.6569	225.17	17.7903
MYLK2	myosin light chain kinase 2	MYLK2	MYLK2	protein_coding	0.00557391	0.0218537	7.45263	2.89775	7.45263	36.1462	4.85012	0.668813	0.885733	1.38117	0.465894	1.38117	6.69886	4.85012	0.0190026	0.0729489	0.185327	-2.43186	-5.39587	6.69886	36.1462
ENSCAFG00000012690	#N/A	ENSCAFG00000012690	---	protein_coding	0.00820781	0.0298637	7.43138	2.89363	7.43138	9.05635	1.21866	0.105416	0.392423	3.58241	1.84093	3.58241	4.36575	1.21866	0.253763	0.466014	0.482066	-1.0527	-2.07441	4.36575	9.05635
CLDN1	claudin 1	CLDN1	CLDN1	protein_coding	0.000606688	0.00345459	0.117582	-3.08826	-8.50473	227.104	1931.46	0.523953	0.813696	1.4876	0.572987	1.4876	2873.24	1931.46	4.8064e-05	0.000449586	12.6516	3.66125	12.6516	2873.24	227.104
SLC27A6	solute carrier family 27 member 6	SLC27A6	SLC27A6	protein_coding	0.0328961	0.0894672	0.726964	-0.460045	-1.37558	2313.22	3182.02	2.75488e-49	9.50228e-46	9.0289	3.17455	9.0289	28730.2	3182.02	6.97455e-64	5.34599e-61	12.42	3.63459	12.42	28730.2	2313.22
OTOA	otoancorin	OTOA	OTOA	protein_coding	0.621793	0.752732	0.77286	-0.37172	-1.29389	23.5024	30.4097	9.11797e-06	0.000343717	9.59535	3.26234	9.59535	291.791	30.4097	9.49572e-07	1.32336e-05	12.4154	3.63406	12.4154	291.791	23.5024
ENSCAFG00000047142	#N/A	ENSCAFG00000047142	---	protein_coding	0.000265308	0.00171049	0.153461	-2.70406	-6.51632	5.40614	35.2281	0.191035	0.535062	1.81441	0.8595	1.81441	63.9183	35.2281	1.34444e-06	1.80791e-05	11.8233	3.56356	11.8233	63.9183	5.40614
MANEAL	mannosidase endo-alpha like	MANEAL	MANEAL	protein_coding	0.000116653	0.000847085	7.15573	2.8391	7.15573	37.0914	5.18345	0.0540178	0.274601	2.75728	1.46324	2.75728	14.2922	5.18345	0.0455694	0.143282	0.385325	-1.37585	-2.59521	14.2922	37.0914
NTRK1	neurotrophic receptor tyrosine kinase 1	NTRK1	NTRK1	protein_coding	0.0549629	0.133649	0.527381	-0.923083	-1.89616	143.203	271.537	5.54766e-08	3.49502e-06	6.0128	2.58804	6.0128	1632.7	271.537	2.32468e-13	8.81142e-12	11.4012	3.51112	11.4012	1632.7	143.203
C16orf96	chromosome 16 open reading frame 96	C16orf96	C16orf96	protein_coding	8.97191e-07	1.1072e-05	0.166521	-2.58623	-6.00526	8.14153	48.892	0.0386404	0.226282	1.89656	0.923387	1.89656	92.7267	48.892	1.75576e-11	5.39514e-10	11.3893	3.50961	11.3893	92.7267	8.14153
TMEM71	transmembrane protein 71	TMEM71	TMEM71	protein_coding	1.04531e-13	4.39071e-12	0.0400431	-4.6423	-24.9731	12.988	324.351	0.0476761	0.255546	0.448643	-1.15636	-2.22894	145.518	324.351	2.69568e-08	5.05331e-07	11.204	3.48594	11.204	145.518	12.988
PLEK2	pleckstrin 2	PLEK2	PLEK2	protein_coding	0.00999603	0.0350662	7.07957	2.82366	7.07957	12.7976	1.80768	0.119179	0.419042	3.37791	1.75613	3.37791	6.10619	1.80768	0.27958	0.496827	0.477135	-1.06753	-2.09584	6.10619	12.7976
TMEM163	transmembrane protein 163	TMEM163	TMEM163	protein_coding	0.0039223	0.0163158	7.06973	2.82166	7.06973	36.0788	5.10328	0.216535	0.563525	2.35556	1.23607	2.35556	12.0211	5.10328	0.0938824	0.243248	0.333189	-1.58559	-3.0013	12.0211	36.0788
ADCY4	adenylate cyclase 4	ADCY4	ADCY4	protein_coding	0.00108213	0.00556266	0.328253	-1.60712	-3.04643	342.288	1042.76	0.000144204	0.00348494	3.63476	1.86186	3.63476	3790.18	1042.76	1.66743e-12	5.69443e-11	11.0731	3.46898	11.0731	3790.18	342.288
TMEM37	transmembrane protein 37	TMEM37	TMEM37	protein_coding	1.79061e-21	1.95544e-19	0.0874438	-3.5155	-11.4359	154.476	1766.57	0.895917	0.972435	0.967556	-0.0475834	-1.03353	1709.26	1766.57	6.30247e-21	4.6008e-19	11.0649	3.46792	11.0649	1709.26	154.476
SLCO5A1	solute carrier organic anion transporter family member 5A1	SLCO5A1	SLCO5A1	protein_coding	0.00599269	0.0232316	6.88474	2.7834	6.88474	10.5215	1.52823	0.0214338	0.155317	5.14303	2.36262	5.14303	7.85975	1.52823	0.616878	0.785153	0.747018	-0.420785	-1.33866	7.85975	10.5215
MAMDC2	MAM domain containing 2	MAMDC2	MAMDC2	protein_coding	0.12143	0.24256	0.447692	-1.15942	-2.23368	10.6365	23.7585	0.00123096	0.0194543	4.88193	2.28745	4.88193	115.987	23.7585	2.74289e-06	3.47508e-05	10.9046	3.44687	10.9046	115.987	10.6365
NAV2	neuron navigator 2	NAV2	NAV2	protein_coding	7.81432e-05	0.000595658	6.74384	2.75357	6.74384	49.6471	7.36185	0.0215455	0.155798	3.10174	1.63308	3.10174	22.8346	7.36185	0.0886104	0.233046	0.459937	-1.12049	-2.17421	22.8346	49.6471
FAM167A	family with sequence similarity 167 member A	FAM167A	FAM167A	protein_coding	0.166655	0.305804	1.65785	0.729317	1.65785	325.38	196.266	2.10004e-15	4.26093e-13	18.0073	4.17051	18.0073	3534.22	196.266	5.35766e-11	1.52726e-09	10.8618	3.44119	10.8618	3534.22	325.38
MGAM	maltase-glucoamylase	MGAM	MGAM	protein_coding	5.10211e-36	1.63707e-33	0.101398	-3.3019	-9.8621	111.784	1102.42	0.605449	0.858978	1.09461	0.130419	1.09461	1206.72	1102.42	9.46755e-39	2.21396e-36	10.7952	3.43231	10.7952	1206.72	111.784
TET1	tet methylcytosine dioxygenase 1	TET1	TET1	protein_coding	8.17559e-06	8.05129e-05	0.0989127	-3.3377	-10.1099	2.98797	30.2081	0.905216	0.975201	1.05004	0.070444	1.05004	31.7197	30.2081	5.54606e-06	6.61929e-05	10.6158	3.40814	10.6158	31.7197	2.98797
ARL4C	ADP ribosylation factor like GTPase 4C	ARL4C	ARL4C	protein_coding	4.01921e-08	6.65703e-07	0.152692	-2.7113	-6.54911	548.075	3589.41	0.169133	0.502375	1.59926	0.677405	1.59926	5740.4	3589.41	6.79099e-12	2.16887e-10	10.4737	3.3887	10.4737	5740.4	548.075
ANGPTL1	angiopoietin like 1	ANGPTL1	ANGPTL1	protein_coding	0.126774	0.250875	0.248665	-2.00772	-4.02147	1.00653	4.04771	0.192148	0.536219	2.58902	1.37241	2.58902	10.4796	4.04771	0.0083954	0.0381401	10.4117	3.38013	10.4117	10.4796	1.00653
TIAM1	TIAM Rac1 associated GEF 1	TIAM1	TIAM1	protein_coding	4.1201e-13	1.5574e-11	0.21783	-2.19873	-4.59075	425.942	1955.39	0.000225507	0.00497017	2.15744	1.10932	2.15744	4218.65	1955.39	9.56976e-28	1.10028e-25	9.90428	3.30805	9.90428	4218.65	425.942
IL17RD	interleukin 17 receptor D	IL17RD	IL17RD	protein_coding	0.383284	0.547997	0.495877	-1.01195	-2.01663	1.35949	2.7416	0.0160801	0.128057	4.82913	2.27176	4.82913	13.2395	2.7416	0.00243402	0.0136735	9.73857	3.28371	9.73857	13.2395	1.35949
UBE2U	ubiquitin conjugating enzyme E2 U	UBE2U	UBE2U	protein_coding	0.00633645	0.0243114	6.32468	2.66099	6.32468	9.67524	1.52976	0.526783	0.815533	1.61056	0.687565	1.61056	2.46377	1.52976	0.0311924	0.107135	0.254647	-1.97343	-3.927	2.46377	9.67524
HGFAC	HGF activator	HGFAC	HGFAC	protein_coding	1.16186e-20	1.17008e-18	0.0333912	-4.90439	-29.948	10.1362	303.558	0.00044657	0.00866374	0.323141	-1.62976	-3.09462	98.0921	303.558	7.21726e-10	1.76554e-08	9.67745	3.27463	9.67745	98.0921	10.1362
TNFAIP6	TNF alpha induced protein 6	TNFAIP6	TNFAIP6	protein_coding	1.21051e-06	1.46503e-05	6.26746	2.64788	6.26746	1049.36	167.43	0.00657502	0.0691957	2.79882	1.48482	2.79882	468.606	167.43	0.0323602	0.110377	0.446565	-1.16306	-2.23932	468.606	1049.36
AREG	amphiregulin	AREG	AREG	protein_coding	0.00639556	0.0245042	0.169362	-2.56182	-5.90452	143.13	845.114	0.447794	0.763619	1.63739	0.711399	1.63739	1383.78	845.114	0.000493353	0.00351591	9.66801	3.27322	9.66801	1383.78	143.13
TTC23L	tetratricopeptide repeat domain 23 like	TTC23L	TTC23L	protein_coding	0.208163	0.358108	0.743143	-0.428288	-1.34564	18.8916	25.4213	1.5396e-22	6.63807e-20	7.04005	2.81559	7.04005	178.967	25.4213	7.34347e-26	7.50502e-24	9.47335	3.24387	9.47335	178.967	18.8916
CDC42EP3	CDC42 effector protein 3	CDC42EP3	CDC42EP3	protein_coding	0.00195103	0.00914526	0.303493	-1.72027	-3.29497	10.5433	34.74	0.0024757	0.0335533	2.85237	1.51216	2.85237	99.0913	34.74	3.16953e-09	7.06462e-08	9.39847	3.23243	9.39847	99.0913	10.5433
LRRC32	leucine rich repeat containing 32	LRRC32	LRRC32	protein_coding	4.88659e-06	5.07683e-05	10.7696	3.4289	10.7696	87.7963	8.15221	2.34043e-05	0.000785668	9.06426	3.18019	9.06426	73.8937	8.15221	0.723868	0.85507	0.841649	-0.248709	-1.18814	73.8937	87.7963
CXHXorf38	#N/A	CXHXorf38	CXHXorf38	protein_coding	1.95445e-14	8.95866e-13	0.262447	-1.9299	-3.81029	188.625	718.715	1.1343e-07	6.64188e-06	2.46601	1.30218	2.46601	1772.36	718.715	7.53465e-38	1.59932e-35	9.3962	3.23208	9.3962	1772.36	188.625
IL1R1	interleukin 1 receptor type 1	IL1R1	IL1R1	protein_coding	4.04584e-13	1.53775e-11	0.217606	-2.20021	-4.59547	121.499	558.347	0.000494504	0.00939763	2.03746	1.02677	2.03746	1137.61	558.347	1.48848e-26	1.60442e-24	9.36306	3.22698	9.36306	1137.61	121.499
CYP27A1	cytochrome P450 family 27 subfamily A member 1	CYP27A1	CYP27A1	protein_coding	1.23606e-06	1.49203e-05	0.182088	-2.45729	-5.49184	196.11	1077.01	0.130736	0.43962	1.69458	0.760924	1.69458	1825.07	1077.01	2.10603e-10	5.51364e-09	9.30634	3.21821	9.30634	1825.07	196.11
SATB1	SATB homeobox 1	SATB1	SATB1	protein_coding	0.00010246	0.000755151	0.436864	-1.19474	-2.28904	53.3812	122.192	2.17067e-12	2.85226e-10	4.06515	2.02331	4.06515	496.728	122.192	1.41926e-26	1.54185e-24	9.3053	3.21805	9.3053	496.728	53.3812
ANGPTL4	angiopoietin like 4	ANGPTL4	ANGPTL4	protein_coding	0.0336125	0.0908071	0.237115	-2.07634	-4.21736	4.19839	17.7061	0.211562	0.556499	2.17774	1.12283	2.17774	38.5594	17.7061	0.000961464	0.00625722	9.18432	3.19917	9.18432	38.5594	4.19839
LTB4R	leukotriene B4 receptor	LTB4R	LTB4R	protein_coding	0.0266092	0.0755562	0.31826	-1.65172	-3.14209	45.5284	143.054	0.035795	0.216322	2.91715	1.54456	2.91715	417.31	143.054	1.70397e-05	0.000180427	9.16593	3.19628	9.16593	417.31	45.5284
LTA	lymphotoxin alpha	LTA	LTA	protein_coding	0.00760631	0.0280825	5.76085	2.52628	5.76085	37.0558	6.43235	0.00428559	0.0510733	6.50837	2.7023	6.50837	41.8641	6.43235	0.845461	0.921902	1.12976	0.176015	1.12976	41.8641	37.0558
LAD1	ladinin 1	LAD1	LAD1	protein_coding	3.69528e-07	5.0529e-06	0.208251	-2.26361	-4.8019	803.689	3859.23	0.0371628	0.220816	1.90001	0.92601	1.90001	7332.6	3859.23	7.80937e-13	2.79134e-11	9.12368	3.18962	9.12368	7332.6	803.689
RBPMS	RNA binding protein, mRNA processing factor	RBPMS	RBPMS	protein_coding	1.56662e-09	3.45282e-08	13.4033	3.74452	13.4033	295.873	22.0746	4.07597e-07	2.14642e-05	8.86267	3.14774	8.86267	195.64	22.0746	0.319778	0.537129	0.661229	-0.596778	-1.51234	195.64	295.873
ENSCAFG00000017509	#N/A	ENSCAFG00000017509	---	protein_coding	0.000419323	0.00254864	5.6331	2.49393	5.6331	22.4544	3.98614	0.252237	0.602305	1.82223	0.865709	1.82223	7.26369	3.98614	0.0145616	0.0592295	0.323487	-1.62822	-3.09132	7.26369	22.4544
CADM3	cell adhesion molecule 3	CADM3	CADM3	protein_coding	0.000215731	0.00143512	3.90984	1.96711	3.90984	35.343	9.03949	4.21191e-09	3.26471e-07	8.39251	3.0691	8.39251	75.864	9.03949	0.0195091	0.0745201	2.14651	1.10199	2.14651	75.864	35.343
SPP2	secreted phosphoprotein 2	SPP2	SPP2	protein_coding	0.00103422	0.00535626	0.328438	-1.60631	-3.04472	122.917	374.247	0.00110757	0.0178517	2.98961	1.57996	2.98961	1118.85	374.247	6.95791e-11	1.94723e-09	9.10252	3.18627	9.10252	1118.85	122.917
G0S2	G0/G1 switch 2	G0S2	G0S2	protein_coding	0.00147814	0.00725505	0.116906	-3.09658	-8.55389	2.30438	19.7114	0.915116	0.97678	1.06289	0.087995	1.06289	20.9511	19.7114	0.00110479	0.00706994	9.09186	3.18458	9.09186	20.9511	2.30438
ENSCAFG00000018374	#N/A	ENSCAFG00000018374	---	protein_coding	0.0126518	0.0423137	0.470128	-1.08887	-2.12708	11.211	23.8466	1.74829e-08	1.23067e-06	4.22073	2.07749	4.22073	100.65	23.8466	2.1525e-14	9.223e-13	8.97781	3.16636	8.97781	100.65	11.211
ARSI	arylsulfatase family member I	ARSI	ARSI	protein_coding	0.0017591	0.00838572	5.53041	2.46739	5.53041	36.1167	6.53057	0.0977603	0.378732	2.52022	1.33355	2.52022	16.4585	6.53057	0.133518	0.308793	0.455702	-1.13384	-2.19442	16.4585	36.1167
NRG1	neuregulin 1	NRG1	NRG1	protein_coding	0.00332765	0.0142538	0.174828	-2.51599	-5.7199	90.6702	518.624	0.449337	0.764414	1.5641	0.645329	1.5641	811.178	518.624	0.000224798	0.00178249	8.94646	3.16132	8.94646	811.178	90.6702
GAB1	GRB2 associated binding protein 1	GAB1	GAB1	protein_coding	0.00049447	0.00292798	0.231805	-2.10902	-4.31397	68.6578	296.188	0.0924219	0.367588	2.00858	1.00618	2.00858	594.918	296.188	2.58213e-07	4.01642e-06	8.66497	3.1152	8.66497	594.918	68.6578
TGFA	transforming growth factor alpha	TGFA	TGFA	protein_coding	0.00129095	0.00647209	0.3526	-1.5039	-2.83607	43.5274	123.447	0.000372088	0.00748353	3.04982	1.60872	3.04982	376.491	123.447	1.97704e-11	6.01536e-10	8.64951	3.11262	8.64951	376.491	43.5274
FAM117A	family with sequence similarity 117 member A	FAM117A	FAM117A	protein_coding	7.95661e-10	1.8419e-08	0.409651	-1.28753	-2.4411	358.195	874.389	1.71695e-18	4.83443e-16	3.48755	1.80221	3.48755	3049.47	874.389	1.05375e-49	4.40565e-47	8.51345	3.08974	8.51345	3049.47	358.195
HECW2	HECT, C2 and WW domain containing E3 ubiquitin protein ligase 2	HECW2	HECW2	protein_coding	2.63414e-06	2.94039e-05	0.124004	-3.01155	-8.06428	5.29558	42.7051	0.898789	0.973001	1.04912	0.0691814	1.04912	44.8028	42.7051	1.64032e-06	2.16362e-05	8.46041	3.08073	8.46041	44.8028	5.29558
PYCR1	pyrroline-5-carboxylate reductase 1	PYCR1	PYCR1	protein_coding	0.0062176	0.0239621	0.473643	-1.07813	-2.11129	51.2896	108.288	1.2911e-07	7.33059e-06	3.99775	1.99919	3.99775	432.906	108.288	2.49953e-15	1.20581e-13	8.44042	3.07731	8.44042	432.906	51.2896
CYP27B1	cytochrome P450 family 27 subfamily B member 1	CYP27B1	CYP27B1	protein_coding	0.515622	0.66811	0.622366	-0.684165	-1.60677	2.70043	4.33897	0.0119695	0.104987	5.13626	2.36072	5.13626	22.2861	4.33897	0.00227626	0.0129507	8.2528	3.04488	8.2528	22.2861	2.70043
AOPEP	aminopeptidase O (putative)	AOPEP	AOPEP	protein_coding	4.39317e-08	7.21578e-07	0.267827	-1.90063	-3.73376	294.7	1100.34	0.000887041	0.0150855	2.21007	1.14409	2.21007	2431.82	1100.34	1.66279e-18	1.01511e-16	8.25184	3.04472	8.25184	2431.82	294.7
ARHGAP10	Rho GTPase activating protein 10	ARHGAP10	ARHGAP10	protein_coding	2.10516e-08	3.72848e-07	0.461101	-1.11684	-2.16872	656.845	1424.51	2.24898e-22	9.4028e-20	3.77615	1.91692	3.77615	5379.19	1424.51	1.1943e-52	5.68197e-50	8.18942	3.03376	8.18942	5379.19	656.845
UST	uronyl 2-sulfotransferase	UST	UST	protein_coding	0.00980054	0.034512	1.70047	0.765932	1.70047	137.762	81.0144	7.57048e-39	9.49545e-36	13.637	3.76946	13.637	1104.79	81.0144	4.42977e-26	4.5953e-24	8.01956	3.00352	8.01956	1104.79	137.762
PDPN	podoplanin	PDPN	PDPN	protein_coding	1.29926e-12	4.54973e-11	0.151525	-2.72237	-6.59958	2111.41	13934.4	0.469475	0.77694	1.21189	0.277263	1.21189	16887	13934.4	5.42164e-15	2.4769e-13	7.99799	2.99964	7.99799	16887	2111.41
IL18RAP	interleukin 18 receptor accessory protein	IL18RAP	IL18RAP	protein_coding	1.70595e-07	2.5066e-06	0.136026	-2.87804	-7.35153	13.4561	98.9229	0.839332	0.95203	1.07399	0.102982	1.07399	106.242	98.9229	6.32655e-08	1.1049e-06	7.89548	2.98103	7.89548	106.242	13.4561
FAM83G	family with sequence similarity 83 member G	FAM83G	FAM83G	protein_coding	6.6275e-08	1.06463e-06	5.80669	2.53772	5.80669	166.432	28.6622	2.02138e-10	1.93673e-08	7.90289	2.98238	7.90289	226.514	28.6622	0.322473	0.540144	1.361	0.444663	1.361	226.514	166.432
EGR2	early growth response 2	EGR2	EGR2	protein_coding	0.958116	0.97532	1.01475	0.021125	1.01475	988.524	974.155	8.52888e-14	1.36829e-11	7.9792	2.99624	7.9792	7772.97	974.155	1.28309e-13	5.04352e-12	7.86321	2.97512	7.86321	7772.97	988.524
GPRC5B	G protein-coupled receptor class C group 5 member B	GPRC5B	GPRC5B	protein_coding	8.76107e-07	1.08409e-05	0.208167	-2.26419	-4.80384	68.729	330.163	0.114748	0.410148	1.63682	0.710896	1.63682	540.418	330.163	9.85567e-11	2.68202e-09	7.86303	2.97508	7.86303	540.418	68.729
CD84	CD84 molecule	CD84	CD84	protein_coding	0.0321765	0.0879087	0.558348	-0.840765	-1.791	549.773	984.642	4.85515e-08	3.10123e-06	4.38936	2.13401	4.38936	4321.95	984.642	3.19773e-14	1.3451e-12	7.86135	2.97478	7.86135	4321.95	549.773
OCSTAMP	osteoclast stimulatory transmembrane protein	OCSTAMP	OCSTAMP	protein_coding	0.0405791	0.105041	0.521906	-0.938138	-1.91605	210.379	403.097	7.85716e-06	0.000304509	4.09351	2.03334	4.09351	1650.08	403.097	7.87966e-11	2.17431e-09	7.84338	2.97147	7.84338	1650.08	210.379
SYNPO	synaptopodin	SYNPO	SYNPO	protein_coding	2.6047e-12	8.80239e-11	6.41918	2.68239	6.41918	659.275	102.704	3.20342e-14	5.45649e-12	7.50936	2.90869	7.50936	771.241	102.704	0.547758	0.735587	1.16983	0.2263	1.16983	771.241	659.275
YPEL3	yippee like 3	YPEL3	YPEL3	protein_coding	2.86214e-12	9.60802e-11	0.0939104	-3.41257	-10.6485	275.063	2928.99	0.335406	0.679422	0.722747	-0.468438	-1.38361	2116.92	2928.99	1.70168e-09	3.91954e-08	7.69614	2.94413	7.69614	2116.92	275.063
MYBPC2	myosin binding protein C2	MYBPC2	MYBPC2	protein_coding	0.88671	0.934145	0.95459	-0.0670464	-1.04757	91.1485	95.4844	6.14716e-10	5.47176e-08	7.3001	2.86792	7.3001	697.045	95.4844	2.69264e-10	6.95701e-09	7.64736	2.93496	7.64736	697.045	91.1485
PDK4	pyruvate dehydrogenase kinase 4	PDK4	PDK4	protein_coding	3.58178e-25	5.88307e-23	0.120271	-3.05564	-8.31454	139.511	1159.97	0.655707	0.881509	0.915037	-0.128097	-1.09285	1061.42	1159.97	3.37631e-23	2.87549e-21	7.60812	2.92754	7.60812	1061.42	139.511
F3	coagulation factor III, tissue factor	F3	F3	protein_coding	0.0293556	0.0816407	0.415262	-1.26791	-2.40812	31.8937	76.8038	0.00336254	0.0424067	3.15661	1.65837	3.15661	242.439	76.8038	4.05281e-07	6.03851e-06	7.60148	2.92628	7.60148	242.439	31.8937
ATP2C2	ATPase secretory pathway Ca2+ transporting 2	ATP2C2	ATP2C2	protein_coding	4.39718e-05	0.000356451	0.259324	-1.94717	-3.85618	56.2021	216.726	0.0368833	0.219534	1.96011	0.970938	1.96011	424.807	216.726	8.36669e-10	2.02163e-08	7.55856	2.91811	7.55856	424.807	56.2021
INSYN2A	inhibitory synaptic factor 2A	INSYN2A	INSYN2A	protein_coding	0.000925466	0.00489033	4.84419	2.27626	4.84419	33.9013	6.99835	0.333269	0.676947	1.62038	0.696329	1.62038	11.34	6.99835	0.0182744	0.0709032	0.334499	-1.57993	-2.98955	11.34	33.9013
MYL4	myosin light chain 4	MYL4	MYL4	protein_coding	0.000853181	0.00458386	4.84083	2.27525	4.84083	37.3437	7.71433	0.269279	0.620622	1.72167	0.783806	1.72167	13.2815	7.71433	0.0245661	0.089007	0.355656	-1.49145	-2.81171	13.2815	37.3437
STON1	stonin 1	STON1	STON1	protein_coding	0.316017	0.481648	1.57138	0.65203	1.57138	9.48837	6.03825	2.99243e-09	2.41442e-07	11.7803	3.5583	11.7803	71.1324	6.03825	3.9995e-07	5.97198e-06	7.4968	2.90627	7.4968	71.1324	9.48837
CELF4	CUGBP Elav-like family member 4	CELF4	CELF4	protein_coding	0.00724277	0.027015	4.83738	2.27423	4.83738	17.5277	3.62339	0.0916818	0.366223	2.75711	1.46316	2.75711	9.99011	3.62339	0.302157	0.519614	0.56996	-0.811067	-1.75451	9.99011	17.5277
PAK3	p21 (RAC1) activated kinase 3	PAK3	PAK3	protein_coding	0.00376122	0.0157603	4.83534	2.27362	4.83534	16.2729	3.36541	0.0723963	0.321795	2.73811	1.45318	2.73811	9.21484	3.36541	0.250256	0.462225	0.56627	-0.820437	-1.76594	9.21484	16.2729
ZNF488	zinc finger protein 488	ZNF488	ZNF488	protein_coding	9.42978e-22	1.0572e-19	0.163271	-2.61466	-6.12478	24.0537	147.323	0.194654	0.538822	1.22158	0.288752	1.22158	179.968	147.323	1.78289e-26	1.90687e-24	7.48192	2.90341	7.48192	179.968	24.0537
ENSCAFG00000041681	#N/A	ENSCAFG00000041681	---	protein_coding	0.00239695	0.0108785	0.252719	-1.98439	-3.95696	8.34035	33.0025	0.131612	0.441599	1.86484	0.899051	1.86484	61.5443	33.0025	8.69188e-06	9.9191e-05	7.3791	2.88345	7.3791	61.5443	8.34035
CTLA4	cytotoxic T-lymphocyte associated protein 4	CTLA4	CTLA4	protein_coding	0.984489	0.991573	0.987158	-0.0186466	-1.01301	7.84166	7.94367	0.00188216	0.0274505	7.23529	2.85505	7.23529	57.4748	7.94367	0.0018665	0.0109677	7.32941	2.8737	7.32941	57.4748	7.84166
CXCL8	C-X-C motif chemokine ligand 8	CXCL8	CXCL8	protein_coding	6.75888e-09	1.32415e-07	0.229082	-2.12607	-4.36525	18721.7	81724.9	0.0423093	0.237873	1.67546	0.74456	1.67546	136927	81724.9	5.02021e-15	2.31651e-13	7.31382	2.87063	7.31382	136927	18721.7
ABLIM1	actin binding LIM protein 1	ABLIM1	ABLIM1	protein_coding	3.3989e-06	3.69249e-05	0.469715	-1.09014	-2.12895	116.88	248.831	1.8974e-15	3.90724e-13	3.42664	1.7768	3.42664	852.654	248.831	2.61768e-35	5.08678e-33	7.29515	2.86694	7.29515	852.654	116.88
ENSCAFG00000004676	#N/A	ENSCAFG00000004676	---	protein_coding	0.0754238	0.170043	0.32199	-1.63491	-3.10569	16.396	50.9208	0.177487	0.513715	2.31837	1.21311	2.31837	118.053	50.9208	0.00188306	0.0110556	7.20014	2.84802	7.20014	118.053	16.396
ADAM12	ADAM metallopeptidase domain 12	ADAM12	ADAM12	protein_coding	0.0662829	0.153952	0.365691	-1.4513	-2.73455	9.89655	27.0626	0.064243	0.302264	2.62104	1.39014	2.62104	70.9322	27.0626	0.000280499	0.00216083	7.16736	2.84144	7.16736	70.9322	9.89655
ABCG1	ATP binding cassette subfamily G member 1	ABCG1	ABCG1	protein_coding	0.0858657	0.186978	0.381851	-1.38892	-2.61883	321.886	842.964	0.07304	0.32351	2.72731	1.44748	2.72731	2299.03	842.964	0.000450291	0.0032496	7.14236	2.8364	7.14236	2299.03	321.886
CSF3	colony stimulating factor 3	CSF3	CSF3	protein_coding	0.0841127	0.18409	0.373302	-1.42159	-2.6788	15.0069	40.2004	0.0776337	0.335239	2.65574	1.40911	2.65574	106.762	40.2004	0.000537087	0.00379038	7.11419	2.8307	7.11419	106.762	15.0069
ATP8B1	ATPase phospholipid transporting 8B1	ATP8B1	ATP8B1	protein_coding	2.33587e-07	3.31223e-06	0.145956	-2.7764	-6.85139	281.1	1925.93	0.935082	0.982038	1.03066	0.0435744	1.03066	1984.98	1925.93	1.51236e-07	2.46352e-06	7.06148	2.81997	7.06148	1984.98	281.1
CSF2	colony stimulating factor 2	CSF2	CSF2	protein_coding	0.868443	0.92385	0.907661	-0.139774	-1.10173	43.7241	48.1722	0.00139672	0.0214594	6.367	2.67061	6.367	306.713	48.1722	0.00079204	0.00531248	7.01473	2.81039	7.01473	306.713	43.7241
VEGFA	vascular endothelial growth factor A	VEGFA	VEGFA	protein_coding	1.28552e-11	3.89811e-10	0.158201	-2.66017	-6.32107	3215.25	20323.8	0.703244	0.901822	1.10924	0.149574	1.10924	22544	20323.8	8.62882e-13	3.06046e-11	7.01159	2.80974	7.01159	22544	3215.25
SPECC1	sperm antigen with calponin homology and coiled-coil domains 1	SPECC1	SPECC1	protein_coding	7.85819e-14	3.34628e-12	0.355781	-1.49094	-2.81072	481.01	1351.99	3.21112e-11	3.54431e-09	2.46813	1.30342	2.46813	3336.87	1351.99	8.49268e-45	2.85789e-42	6.93721	2.79436	6.93721	3336.87	481.01
ENSCAFG00000025031	#N/A	ENSCAFG00000025031	---	protein_coding	6.87238e-13	2.47567e-11	0.0355658	-4.81337	-28.1169	13.1357	369.334	0.00144526	0.0221067	0.245731	-2.02485	-4.06949	90.757	369.334	3.61827e-05	0.000349589	6.9092	2.78852	6.9092	90.757	13.1357
YPEL2	yippee like 2	YPEL2	YPEL2	protein_coding	0.000244675	0.00159536	0.155093	-2.6888	-6.44775	11.0716	71.3866	0.891029	0.971373	1.0683	0.0953123	1.0683	76.2621	71.3866	0.000148258	0.00123372	6.88811	2.78411	6.88811	76.2621	11.0716
GASK1B	golgi associated kinase 1B	GASK1B	GASK1B	protein_coding	0.00633241	0.0243027	0.238654	-2.06701	-4.19017	31.998	134.077	0.342562	0.68557	1.63231	0.706917	1.63231	218.856	134.077	0.000244752	0.0019154	6.83966	2.77393	6.83966	218.856	31.998
SEMA4C	semaphorin 4C	SEMA4C	SEMA4C	protein_coding	0.00473659	0.0190638	0.145145	-2.78443	-6.88966	4.67327	32.1972	0.969651	0.991053	0.976036	-0.0349944	-1.02455	31.4256	32.1972	0.00539349	0.0265575	6.72455	2.74944	6.72455	31.4256	4.67327
PAMR1	peptidase domain containing associated with muscle regeneration 1	PAMR1	PAMR1	protein_coding	7.33184e-07	9.25502e-06	0.0849072	-3.55797	-11.7776	4.39101	51.7155	0.189921	0.533411	0.570103	-0.810706	-1.75407	29.4831	51.7155	0.00015983	0.00131496	6.71442	2.74726	6.71442	29.4831	4.39101
ADD3	adducin 3	ADD3	ADD3	protein_coding	0.00138185	0.00686548	0.473793	-1.07767	-2.11062	232.813	491.382	6.16318e-07	3.16109e-05	3.16287	1.66123	3.16287	1554.18	491.382	3.44999e-16	1.7695e-14	6.67564	2.73891	6.67564	1554.18	232.813
IGFLR1	IGF like family receptor 1	IGFLR1	IGFLR1	protein_coding	1.69478e-12	5.84574e-11	0.321836	-1.6356	-3.10717	100.741	313.02	4.71878e-07	2.47547e-05	2.14678	1.10217	2.14678	671.985	313.02	1.04634e-32	1.65936e-30	6.6704	2.73777	6.6704	671.985	100.741
KLF4	Kruppel like factor 4	KLF4	KLF4	protein_coding	0.0491695	0.122365	0.444835	-1.16866	-2.24803	265.209	596.196	0.00818015	0.0802143	2.96119	1.56618	2.96119	1765.45	596.196	4.07967e-06	4.99887e-05	6.65684	2.73484	6.65684	1765.45	265.209
TMEM89	transmembrane protein 89	TMEM89	TMEM89	protein_coding	8.59597e-07	1.06653e-05	0.101162	-3.30527	-9.88517	4.68506	46.3126	0.310374	0.658214	0.669244	-0.579397	-1.49422	30.9944	46.3126	6.03795e-05	0.000550437	6.61559	2.72587	6.61559	30.9944	4.68506
LMO7	LIM domain 7	LMO7	LMO7	protein_coding	0.0106102	0.0367441	4.26694	2.0932	4.26694	23.1779	5.43197	0.855044	0.957085	1.11709	0.159742	1.11709	6.06799	5.43197	0.0188952	0.0726781	0.261801	-1.93346	-3.8197	6.06799	23.1779
SSC4D	scavenger receptor cysteine rich family member with 4 domains	SSC4D	SSC4D	protein_coding	0.00079123	0.00429957	0.190873	-2.38932	-5.23909	3.40039	17.815	0.573	0.840829	1.25386	0.326382	1.25386	22.3375	17.815	0.000132974	0.00112073	6.56911	2.7157	6.56911	22.3375	3.40039
PMEPA1	prostate transmembrane protein, androgen induced 1	PMEPA1	PMEPA1	protein_coding	2.52023e-18	1.88205e-16	0.181856	-2.45913	-5.49887	190.644	1048.33	0.357129	0.697087	1.1927	0.254229	1.1927	1250.34	1048.33	5.78811e-22	4.41208e-20	6.55849	2.71336	6.55849	1250.34	190.644
DNM1	dynamin 1	DNM1	DNM1	protein_coding	2.99401e-08	5.09351e-07	0.0779477	-3.68135	-12.8291	18.0382	231.415	0.126457	0.432721	0.508006	-0.977082	-1.96848	117.56	231.415	5.03494e-05	0.000468107	6.51727	2.70427	6.51727	117.56	18.0382
EPOP	elongin BC and polycomb repressive complex 2 associated protein	EPOP	EPOP	protein_coding	0.347111	0.512976	0.718194	-0.477555	-1.39238	75.9998	105.821	8.67606e-06	0.000330673	4.67593	2.22525	4.67593	494.81	105.821	7.98738e-08	1.35884e-06	6.51068	2.70281	6.51068	494.81	75.9998
EEPD1	endonuclease/exonuclease/phosphatase family domain containing 1	EEPD1	EEPD1	protein_coding	4.30269e-18	3.09189e-16	0.0329337	-4.92429	-30.364	20.3094	616.676	3.94524e-05	0.00122046	0.213501	-2.22769	-4.68382	131.661	616.676	2.42686e-06	3.10895e-05	6.48275	2.6966	6.48275	131.661	20.3094
DHH	desert hedgehog signaling molecule	DHH	DHH	protein_coding	0.312918	0.478405	1.90115	0.926876	1.90115	15.8842	8.35504	0.00201786	0.0289102	6.88486	2.78343	6.88486	57.5233	8.35504	0.0356643	0.118827	3.62141	1.85655	3.62141	57.5233	15.8842
PTPRS	protein tyrosine phosphatase receptor type S	PTPRS	PTPRS	protein_coding	0.478389	0.637325	0.757254	-0.40115	-1.32056	204.257	269.734	4.67966e-05	0.00138522	4.90245	2.2935	4.90245	1322.36	269.734	1.79833e-06	2.35628e-05	6.47398	2.69465	6.47398	1322.36	204.257
INHBA	inhibin subunit beta A	INHBA	INHBA	protein_coding	0.246511	0.403345	1.68017	0.748608	1.68017	206.078	122.653	1.02582e-07	6.12694e-06	10.7519	3.42652	10.7519	1318.75	122.653	3.0688e-05	0.000303079	6.39927	2.67791	6.39927	1318.75	206.078
SLC16A10	solute carrier family 16 member 10	SLC16A10	SLC16A10	protein_coding	1.33761e-24	2.09345e-22	0.0913707	-3.45212	-10.9444	41.1261	450.101	0.0140746	0.11691	0.584625	-0.774415	-1.7105	263.141	450.101	2.9929e-15	1.4239e-13	6.39839	2.67771	6.39839	263.141	41.1261
DUSP22	dual specificity phosphatase 22	DUSP22	DUSP22	protein_coding	3.42885e-22	4.00913e-20	0.221635	-2.17374	-4.51192	134.887	608.602	0.0188841	0.142842	1.41777	0.503622	1.41777	862.856	608.602	6.58248e-33	1.05603e-30	6.39686	2.67736	6.39686	862.856	134.887
ENSCAFG00000023429	#N/A	ENSCAFG00000023429	---	protein_coding	0.0345995	0.0927472	0.483954	-1.04706	-2.06631	18.3349	37.8856	0.000468445	0.00903936	3.06894	1.61774	3.06894	116.269	37.8856	3.96008e-08	7.18511e-07	6.3414	2.6648	6.3414	116.269	18.3349
AXDND1	axonemal dynein light chain domain containing 1	AXDND1	AXDND1	protein_coding	3.73348e-10	9.2479e-09	0.0850611	-3.55536	-11.7563	7.66006	90.0536	0.0701152	0.316862	0.536264	-0.898986	-1.86475	48.2925	90.0536	3.84914e-06	4.74166e-05	6.30445	2.65637	6.30445	48.2925	7.66006
SCIN	scinderin	SCIN	SCIN	protein_coding	1.74534e-07	2.55631e-06	0.344227	-1.53857	-2.90506	277.903	807.326	0.000141047	0.00343216	2.15438	1.10728	2.15438	1739.29	807.326	2.22645e-19	1.46278e-17	6.25861	2.64584	6.25861	1739.29	277.903
C7H1orf116	#N/A	C7H1orf116	C7H1orf116	protein_coding	0.301283	0.466931	0.556491	-0.845569	-1.79697	16.7121	30.0312	0.0244285	0.168267	3.46402	1.79245	3.46402	104.029	30.0312	0.00111966	0.00715844	6.22475	2.63802	6.22475	104.029	16.7121
PCP4L1	Purkinje cell protein 4 like 1	PCP4L1	PCP4L1	protein_coding	0.198772	0.346664	0.403978	-1.30765	-2.47538	199.93	494.903	0.191614	0.535595	2.50865	1.32691	2.50865	1241.54	494.903	0.00960191	0.0424392	6.20987	2.63456	6.20987	1241.54	199.93
CD4	CD4 molecule	CD4	CD4	protein_coding	0.00475647	0.0191326	0.212169	-2.23671	-4.71322	917.696	4325.31	0.64622	0.877085	1.28653	0.36349	1.28653	5564.66	4325.31	0.00103124	0.00666347	6.06372	2.6002	6.06372	5564.66	917.696
KCNN2	potassium calcium-activated channel subfamily N member 2	KCNN2	KCNN2	protein_coding	0.00489191	0.0196145	0.157053	-2.67068	-6.36728	2.97869	18.9661	0.932794	0.981375	0.952016	-0.0709427	-1.0504	18.0561	18.9661	0.00640208	0.0306274	6.06175	2.59973	6.06175	18.0561	2.97869
DRC3	dynein regulatory complex subunit 3	DRC3	DRC3	protein_coding	0.0224489	0.0660118	0.199604	-2.32479	-5.00992	1.66018	8.31739	0.75819	0.923931	1.19432	0.256189	1.19432	9.93362	8.31739	0.011261	0.0482809	5.98345	2.58098	5.98345	9.93362	1.66018
GPM6B	glycoprotein M6B	GPM6B	GPM6B	protein_coding	0.48695	0.644718	0.65546	-0.609421	-1.52565	24.3874	37.2065	0.0227469	0.160285	3.90652	1.96588	3.90652	145.348	37.2065	0.00307229	0.0166425	5.95997	2.57531	5.95997	145.348	24.3874
ICOS	inducible T cell costimulator	ICOS	ICOS	protein_coding	0.892962	0.938467	0.920198	-0.119984	-1.08672	15.6423	16.9988	0.00483979	0.0558783	5.47813	2.45368	5.47813	93.1216	16.9988	0.00327616	0.0175266	5.95321	2.57367	5.95321	93.1216	15.6423
C5H16orf74	#N/A	C5H16orf74	C5H16orf74	protein_coding	0.00244114	0.0110364	0.198492	-2.33285	-5.03799	7.86997	39.6488	0.741028	0.916525	1.17956	0.238253	1.17956	46.7683	39.6488	0.000839719	0.00558336	5.94263	2.5711	5.94263	46.7683	7.86997
PXDC1	PX domain containing 1	PXDC1	PXDC1	protein_coding	1.05047e-10	2.84184e-09	0.294939	-1.76151	-3.39054	132.22	448.298	0.00229297	0.0318271	1.74942	0.806876	1.74942	784.262	448.298	3.53631e-21	2.62314e-19	5.93147	2.56839	5.93147	784.262	132.22
SLC15A1	solute carrier family 15 member 1	SLC15A1	SLC15A1	protein_coding	0.0364346	0.0965037	0.577168	-0.792937	-1.7326	242.241	419.707	2.5986e-06	0.000112745	3.40308	1.76684	3.40308	1428.29	419.707	1.23567e-11	3.86587e-10	5.89616	2.55978	5.89616	1428.29	242.241
CNRIP1	cannabinoid receptor interacting protein 1	CNRIP1	CNRIP1	protein_coding	2.12606e-08	3.76068e-07	0.0944437	-3.4044	-10.5883	29.0705	307.808	0.150421	0.472151	0.554661	-0.850321	-1.8029	170.729	307.808	2.80242e-05	0.000280181	5.87293	2.55408	5.87293	170.729	29.0705
ETV3L	ETS variant transcription factor 3 like	ETV3L	ETV3L	protein_coding	0.000862678	0.00462767	0.149668	-2.74016	-6.68145	1.99017	13.2972	0.76563	0.926152	0.878923	-0.186192	-1.13776	11.6873	13.2972	0.002156	0.0123761	5.87248	2.55397	5.87248	11.6873	1.99017
ENSCAFG00000014123	#N/A	ENSCAFG00000014123	---	protein_coding	9.47683e-09	1.79604e-07	0.226671	-2.14133	-4.41169	13.91	61.3665	0.19857	0.543583	1.3222	0.402945	1.3222	81.139	61.3665	7.66201e-12	2.4414e-10	5.83315	2.54428	5.83315	81.139	13.91
SYNGAP1	synaptic Ras GTPase activating protein 1	SYNGAP1	SYNGAP1	protein_coding	0.00341813	0.01456	0.403478	-1.30944	-2.47845	11.2389	27.8551	0.00154215	0.0233046	2.33655	1.22438	2.33655	65.0847	27.8551	5.58764e-09	1.17699e-07	5.79102	2.53382	5.79102	65.0847	11.2389
TP53INP1	tumor protein p53 inducible nuclear protein 1	TP53INP1	TP53INP1	protein_coding	1.08439e-06	1.32519e-05	0.0852484	-3.55218	-11.7304	15.9411	186.996	0.147678	0.469176	0.493614	-1.01854	-2.02587	92.3041	186.996	0.000536198	0.00378798	5.79031	2.53364	5.79031	92.3041	15.9411
DEPDC7	DEP domain containing 7	DEPDC7	DEPDC7	protein_coding	0.00554395	0.021761	0.25052	-1.997	-3.9917	12.9824	51.822	0.436505	0.756412	1.44992	0.53597	1.44992	75.1376	51.822	0.000423183	0.00307709	5.78763	2.53297	5.78763	75.1376	12.9824
PLEKHA7	pleckstrin homology domain containing A7	PLEKHA7	PLEKHA7	protein_coding	0.014056	0.0458682	4.77521	2.25556	4.77521	7.24979	1.51821	0.00294556	0.0384847	6.48867	2.69792	6.48867	9.85119	1.51821	0.532835	0.724129	1.35882	0.442358	1.35882	9.85119	7.24979
SORL1	sortilin related receptor 1	SORL1	SORL1	protein_coding	0.00124613	0.00627937	0.361147	-1.46934	-2.76895	207.383	574.235	0.0193755	0.145127	2.08087	1.05719	2.08087	1194.91	574.235	2.74911e-08	5.14647e-07	5.76184	2.52653	5.76184	1194.91	207.383
IFT81	intraflagellar transport 81	IFT81	IFT81	protein_coding	1.27201e-16	7.61844e-15	0.214287	-2.22238	-4.66664	50.5467	235.883	0.21811	0.564484	1.23435	0.303752	1.23435	291.163	235.883	4.85475e-21	3.58187e-19	5.76027	2.52614	5.76027	291.163	50.5467
SERPINB2	serpin family B member 2	SERPINB2	SERPINB2	protein_coding	4.42422e-06	4.64543e-05	0.0815586	-3.61602	-12.2611	342.426	4198.53	0.16482	0.495321	0.46889	-1.09268	-2.13269	1968.65	4198.53	0.00136119	0.0084444	5.74912	2.52334	5.74912	1968.65	342.426
NR3C2	nuclear receptor subfamily 3 group C member 2	NR3C2	NR3C2	protein_coding	9.3094e-08	1.43993e-06	0.337375	-1.56757	-2.96406	105.558	312.879	0.000969179	0.01613	1.91561	0.937807	1.91561	599.355	312.879	1.02549e-17	5.84654e-16	5.67799	2.50538	5.67799	599.355	105.558
A4GALT	alpha 1,4-galactosyltransferase (P blood group)	A4GALT	A4GALT	protein_coding	0.00194573	0.00912485	0.50327	-0.990595	-1.987	1614.79	3208.6	2.13547e-06	9.47365e-05	2.85388	1.51292	2.85388	9156.96	3208.6	4.72938e-15	2.19701e-13	5.67067	2.50352	5.67067	9156.96	1614.79
CD9	CD9 molecule	CD9	CD9	protein_coding	4.49346e-07	6.00157e-06	0.482876	-1.05028	-2.07093	1510.93	3129.01	2.59371e-12	3.34443e-10	2.73231	1.45012	2.73231	8549.43	3129.01	2.56096e-33	4.30897e-31	5.6584	2.50039	5.6584	8549.43	1510.93
MATK	megakaryocyte-associated tyrosine kinase	MATK	MATK	protein_coding	0.410933	0.574374	1.15252	0.204787	1.15252	2825.35	2451.46	1.75041e-27	1.27107e-24	6.50535	2.70163	6.50535	15947.6	2451.46	1.01892e-23	8.95414e-22	5.64448	2.49684	5.64448	15947.6	2825.35
ASPRV1	aspartic peptidase retroviral like 1	ASPRV1	ASPRV1	protein_coding	5.59618e-11	1.58543e-09	0.112161	-3.15635	-8.91573	82.5524	736.015	0.156882	0.482018	0.627849	-0.67151	-1.59274	462.107	736.015	2.58723e-07	4.01982e-06	5.59773	2.48484	5.59773	462.107	82.5524
C9H17orf64	#N/A	C9H17orf64	C9H17orf64	protein_coding	2.59758e-13	1.01526e-11	0.162759	-2.61919	-6.14406	16.4159	100.86	0.652485	0.880419	0.908795	-0.137973	-1.10036	91.6614	100.86	6.14783e-12	1.9726e-10	5.58369	2.48122	5.58369	91.6614	16.4159
KCNJ12	potassium inwardly rectifying channel subfamily J member 12	KCNJ12	KCNJ12	protein_coding	0.00382527	0.0159786	3.62109	1.85642	3.62109	40.0551	11.0616	0.591474	0.852724	1.28259	0.35906	1.28259	14.1875	11.0616	0.0190465	0.0730972	0.3542	-1.49736	-2.82326	14.1875	40.0551
EPAS1	endothelial PAS domain protein 1	EPAS1	EPAS1	protein_coding	0.390101	0.55464	0.800053	-0.321833	-1.24992	116.606	145.748	4.42638e-09	3.41177e-07	4.46602	2.15899	4.46602	650.914	145.748	2.07632e-11	6.28223e-10	5.58215	2.48082	5.58215	650.914	116.606
CORO2A	coronin 2A	CORO2A	CORO2A	protein_coding	0.104181	0.216353	0.778265	-0.361666	-1.28491	1387.01	1782.18	3.36117e-21	1.28817e-18	4.27322	2.09532	4.27322	7615.66	1782.18	1.87122e-28	2.1879e-26	5.4907	2.45699	5.4907	7615.66	1387.01
FSD2	fibronectin type III and SPRY domain containing 2	FSD2	FSD2	protein_coding	0.00978355	0.0344659	0.196517	-2.34727	-5.08862	1.68222	8.56017	0.884034	0.968401	1.07354	0.102371	1.07354	9.18965	8.56017	0.0072872	0.0340588	5.46282	2.44965	5.46282	9.18965	1.68222
ANXA4	annexin A4	ANXA4	ANXA4	protein_coding	0.0188085	0.0575646	0.476026	-1.07089	-2.10073	262.857	552.191	0.00239895	0.0327357	2.59669	1.37667	2.59669	1433.87	552.191	7.56869e-08	1.2956e-06	5.45493	2.44756	5.45493	1433.87	262.857
ESYT3	extended synaptotagmin 3	ESYT3	ESYT3	protein_coding	0.154559	0.289853	0.420295	-1.25052	-2.37928	4.30281	10.2376	0.135149	0.448312	2.29167	1.1964	2.29167	23.4612	10.2376	0.00450328	0.022851	5.45253	2.44692	5.45253	23.4612	4.30281
FYN	FYN proto-oncogene, Src family tyrosine kinase	FYN	FYN	protein_coding	0.988556	0.992946	1.00514	0.0073973	1.00514	316.353	314.735	1.92156e-06	8.63574e-05	5.45475	2.44751	5.45475	1716.8	314.735	2.08254e-06	2.70045e-05	5.42686	2.44012	5.42686	1716.8	316.353
HAS2	hyaluronan synthase 2	HAS2	HAS2	protein_coding	0.0216963	0.0643334	0.484078	-1.04669	-2.06578	583.666	1205.73	0.00221624	0.0310117	2.62404	1.39179	2.62404	3163.88	1205.73	8.72063e-08	1.4763e-06	5.4207	2.43848	5.4207	3163.88	583.666
CCSAP	centriole, cilia and spindle associated protein	CCSAP	CCSAP	protein_coding	0.00101579	0.00528864	0.242604	-2.04332	-4.12194	6.56687	27.0683	0.491068	0.791909	1.2997	0.378177	1.2997	35.1806	27.0683	9.46593e-05	0.000820876	5.35729	2.4215	5.35729	35.1806	6.56687
EGLN3	egl-9 family hypoxia inducible factor 3	EGLN3	EGLN3	protein_coding	0.00103338	0.00535549	3.69206	1.88443	3.69206	131.49	35.6143	5.20801e-06	0.000211962	6.10229	2.60935	6.10229	217.329	35.6143	0.196846	0.395499	1.65281	0.724924	1.65281	217.329	131.49
CHN1	chimerin 1	CHN1	CHN1	protein_coding	0.536493	0.685306	0.76889	-0.379152	-1.30058	6.27372	8.15945	0.000140656	0.00342868	4.11477	2.04081	4.11477	33.5743	8.15945	1.95355e-05	0.000202808	5.35158	2.41996	5.35158	33.5743	6.27372
ABCB1	ATP binding cassette subfamily B member 1	ABCB1	ABCB1	protein_coding	1.94802e-06	2.2323e-05	0.179144	-2.48081	-5.5821	430.299	2401.97	0.902071	0.973593	0.956616	-0.063988	-1.04535	2297.77	2401.97	3.56178e-06	4.41527e-05	5.33993	2.41682	5.33993	2297.77	430.299
ARHGEF33	Rho guanine nucleotide exchange factor 33	ARHGEF33	ARHGEF33	protein_coding	0.345529	0.511685	0.538745	-0.892325	-1.85616	3.52508	6.54314	0.0766341	0.3327	2.86723	1.51966	2.86723	18.7607	6.54314	0.00843448	0.0382924	5.32206	2.41198	5.32206	18.7607	3.52508
ENSCAFG00000031682	#N/A	ENSCAFG00000031682	---	protein_coding	0.00386295	0.0161262	3.45008	1.78663	3.45008	24.8256	7.19565	0.608516	0.860189	1.26437	0.338423	1.26437	9.09798	7.19565	0.0183178	0.0710039	0.366477	-1.44821	-2.72869	9.09798	24.8256
GFPT2	glutamine-fructose-6-phosphate transaminase 2	GFPT2	GFPT2	protein_coding	0.501303	0.657148	1.32477	0.405738	1.32477	20.1032	15.1749	1.32779e-06	6.23112e-05	6.98626	2.80452	6.98626	106.016	15.1749	2.93022e-05	0.000290851	5.27358	2.39878	5.27358	106.016	20.1032
ENSCAFG00000016013	#N/A	ENSCAFG00000016013	---	protein_coding	0.00695345	0.0261836	3.42599	1.77652	3.42599	28.9119	8.43898	0.676873	0.889079	1.22203	0.28928	1.22203	10.3127	8.43898	0.0235049	0.0859294	0.356694	-1.48724	-2.80353	10.3127	28.9119
CLEC1B	C-type lectin domain family 1 member B	CLEC1B	CLEC1B	protein_coding	5.56396e-05	0.000439416	0.10038	-3.31645	-9.9621	2.34119	23.3232	0.166036	0.497782	0.529041	-0.918548	-1.89021	12.3389	23.3232	0.00445526	0.0226573	5.27036	2.3979	5.27036	12.3389	2.34119
DOCK5	dedicator of cytokinesis 5	DOCK5	DOCK5	protein_coding	1.93432e-05	0.000172068	0.258904	-1.94951	-3.86243	244.251	943.404	0.329465	0.673386	1.35898	0.442522	1.35898	1282.07	943.404	1.57989e-07	2.56143e-06	5.24896	2.39203	5.24896	1282.07	244.251
ENSCAFG00000045495	#N/A	ENSCAFG00000045495	---	protein_coding	0.00294542	0.0128968	3.40754	1.76873	3.40754	34.4531	10.1108	0.421044	0.744467	1.41418	0.499967	1.41418	14.2985	10.1108	0.030488	0.105204	0.415015	-1.26876	-2.40955	14.2985	34.4531
C9orf50	chromosome 9 open reading frame 50	C9orf50	C9orf50	protein_coding	1.44769e-06	1.71387e-05	0.0752182	-3.73277	-13.2947	2.01109	26.7367	0.0180106	0.138337	0.392839	-1.34799	-2.54557	10.5032	26.7367	0.00304747	0.0165405	5.22266	2.38479	5.22266	10.5032	2.01109
ENSCAFG00000023832	#N/A	ENSCAFG00000023832	---	protein_coding	0.0951284	0.20245	1.45431	0.540339	1.45431	568.56	390.947	1.22308e-19	3.74997e-17	7.58096	2.92238	7.58096	2963.76	390.947	1.31342e-13	5.14809e-12	5.21274	2.38204	5.21274	2963.76	568.56
HPGD	15-hydroxyprostaglandin dehydrogenase	HPGD	HPGD	protein_coding	0.828411	0.897917	1.08299	0.115023	1.08299	16.1327	14.8964	5.38224e-07	2.80222e-05	5.62731	2.49244	5.62731	83.8264	14.8964	1.82298e-06	2.38404e-05	5.19607	2.37742	5.19607	83.8264	16.1327
MAOA	monoamine oxidase A	MAOA	MAOA	protein_coding	1.03141e-31	2.29522e-29	0.255172	-1.97046	-3.91892	258.014	1011.14	0.0134141	0.113334	1.31907	0.399522	1.31907	1333.76	1011.14	3.48685e-45	1.2027e-42	5.16933	2.36998	5.16933	1333.76	258.014
EPHX1	epoxide hydrolase 1	EPHX1	EPHX1	protein_coding	6.23535e-12	1.99142e-10	0.163301	-2.6144	-6.12367	428.849	2626.13	0.502382	0.799147	0.838611	-0.253926	-1.19245	2202.3	2626.13	5.49019e-10	1.36483e-08	5.13538	2.36047	5.13538	2202.3	428.849
REPS2	RALBP1 associated Eps domain containing 2	REPS2	REPS2	protein_coding	1.24255e-23	1.78578e-21	0.191941	-2.38126	-5.20992	100.156	521.805	0.917497	0.97773	0.983928	-0.0233758	-1.01633	513.418	521.805	4.21217e-23	3.52214e-21	5.12619	2.35789	5.12619	513.418	100.156
WIPI1	WD repeat domain, phosphoinositide interacting 1	WIPI1	WIPI1	protein_coding	5.96801e-07	7.69539e-06	0.307567	-1.70103	-3.25132	507.365	1649.61	0.0531186	0.271805	1.57551	0.655821	1.57551	2598.98	1649.61	4.53831e-12	1.47329e-10	5.1225	2.35685	5.1225	2598.98	507.365
SLC25A43	solute carrier family 25 member 43	SLC25A43	SLC25A43	protein_coding	0.000197991	0.00133289	0.556305	-0.846051	-1.79757	106.066	190.661	2.54174e-12	3.30834e-10	2.84677	1.50933	2.84677	542.768	190.661	4.7304e-26	4.87054e-24	5.11728	2.35538	5.11728	542.768	106.066
CHDH	choline dehydrogenase	CHDH	CHDH	protein_coding	4.21743e-05	0.0003439	3.32851	1.73488	3.32851	810.842	243.605	0.092596	0.367791	1.64093	0.714517	1.64093	399.739	243.605	0.0158055	0.063135	0.492993	-1.02036	-2.02843	399.739	810.842
NECTIN4	nectin cell adhesion molecule 4	NECTIN4	NECTIN4	protein_coding	0.00271135	0.0120246	0.2115	-2.24127	-4.72812	4.10196	19.3946	0.865252	0.961139	1.07962	0.110527	1.07962	20.9388	19.3946	0.00170707	0.0102197	5.10459	2.35179	5.10459	20.9388	4.10196
KEL	Kell metallo-endopeptidase (Kell blood group)	KEL	KEL	protein_coding	2.9864e-13	1.15416e-11	6.80926	2.7675	6.80926	1204.31	176.863	6.40374e-11	6.69336e-09	5.58027	2.48033	5.58027	986.944	176.863	0.444533	0.653376	0.819512	-0.287164	-1.22024	986.944	1204.31
SCNN1B	sodium channel epithelial 1 subunit beta	SCNN1B	SCNN1B	protein_coding	0.0206553	0.0618314	0.404326	-1.30641	-2.47325	10.2257	25.2906	0.0435007	0.241521	2.0546	1.03886	2.0546	51.9621	25.2906	2.39591e-05	0.000244139	5.08154	2.34526	5.08154	51.9621	10.2257
ENSCAFG00000042019	#N/A	ENSCAFG00000042019	---	protein_coding	0.0420176	0.107814	0.323821	-1.62673	-3.08812	4.9921	15.4162	0.325669	0.669757	1.64189	0.715356	1.64189	25.3117	15.4162	0.00314308	0.0169461	5.07035	2.34209	5.07035	25.3117	4.9921
TJP2	tight junction protein 2	TJP2	TJP2	protein_coding	0.000514947	0.00302072	0.349155	-1.51806	-2.86406	94.474	270.579	0.0577988	0.285313	1.76116	0.816526	1.76116	476.533	270.579	8.74322e-08	1.47831e-06	5.04406	2.33459	5.04406	476.533	94.474
CEBPE	CCAAT enhancer binding protein epsilon	CEBPE	CEBPE	protein_coding	2.96169e-12	9.84637e-11	0.124185	-3.00944	-8.0525	15.0335	121.057	0.0803806	0.341654	0.626061	-0.675625	-1.59729	75.7892	121.057	9.04173e-08	1.52318e-06	5.04136	2.33381	5.04136	75.7892	15.0335
SH3PXD2A	SH3 and PX domains 2A	SH3PXD2A	SH3PXD2A	protein_coding	6.50111e-08	1.04663e-06	0.204469	-2.29005	-4.89072	937.526	4585.18	0.930293	0.980817	1.02598	0.0370031	1.02598	4704.3	4585.18	3.98773e-08	7.2203e-07	5.01779	2.32705	5.01779	4704.3	937.526
BASP1	brain abundant membrane attached signal protein 1	BASP1	BASP1	protein_coding	0.0678089	0.156713	0.591611	-0.757279	-1.6903	1170.22	1978.03	0.000154289	0.00367656	2.96285	1.56698	2.96285	5860.59	1978.03	2.04713e-08	3.89575e-07	5.0081	2.32426	5.0081	5860.59	1170.22
BGN	biglycan	BGN	BGN	protein_coding	0.411488	0.574917	1.23861	0.308723	1.23861	120.545	97.3231	1.18682e-12	1.62124e-10	6.18322	2.62836	6.18322	601.77	97.3231	3.21448e-10	8.24353e-09	4.99206	2.31964	4.99206	601.77	120.545
ENSCAFG00000049493	#N/A	ENSCAFG00000049493	---	protein_coding	0.0113917	0.038798	3.26493	1.70705	3.26493	26.2861	8.05104	0.221461	0.568254	1.79933	0.847459	1.79933	14.4865	8.05104	0.189115	0.385181	0.551108	-0.859593	-1.81453	14.4865	26.2861
ENSCAFG00000042496	#N/A	ENSCAFG00000042496	---	protein_coding	0.000172858	0.0011877	0.188694	-2.40588	-5.29959	5.03861	26.7025	0.87354	0.963948	0.941206	-0.0874182	-1.06247	25.1326	26.7025	0.000328517	0.00247815	4.988	2.31846	4.988	25.1326	5.03861
NFIL3	nuclear factor, interleukin 3 regulated	NFIL3	NFIL3	protein_coding	7.22087e-18	5.08298e-16	0.29365	-1.76783	-3.40542	562.564	1915.76	0.00715467	0.0733926	1.45964	0.545611	1.45964	2796.32	1915.76	1.73393e-29	2.19478e-27	4.97068	2.31344	4.97068	2796.32	562.564
ENSCAFG00000025589	#N/A	ENSCAFG00000025589	---	protein_coding	0.10219	0.213365	1.50983	0.59439	1.50983	239.222	158.443	8.10011e-16	1.71934e-13	7.48295	2.90361	7.48295	1185.62	158.443	1.2681e-10	3.42386e-09	4.95614	2.30922	4.95614	1185.62	239.222
AKAP5	A-kinase anchoring protein 5	AKAP5	AKAP5	protein_coding	0.0196141	0.0594502	0.353318	-1.50096	-2.83031	10.792	30.5448	0.184764	0.526136	1.73996	0.799056	1.73996	53.1469	30.5448	0.000313045	0.00237835	4.92464	2.30002	4.92464	53.1469	10.792
RNF222	ring finger protein 222	RNF222	RNF222	protein_coding	0.0073165	0.0272311	0.326431	-1.61515	-3.06344	7.80846	23.9207	0.205711	0.550891	1.60729	0.684633	1.60729	38.4476	23.9207	0.000115615	0.000988927	4.92384	2.29978	4.92384	38.4476	7.80846
CPLX1	complexin 1	CPLX1	CPLX1	protein_coding	8.47572e-05	0.000639363	3.19316	1.67499	3.19316	500.596	156.771	0.0494457	0.26098	1.79034	0.840236	1.79034	280.674	156.771	0.0492831	0.151844	0.56068	-0.834751	-1.78355	280.674	500.596
N4BP2L1	NEDD4 binding protein 2 like 1	N4BP2L1	N4BP2L1	protein_coding	1.37706e-05	0.000127426	0.333783	-1.58302	-2.99596	205.346	615.208	0.0473336	0.254446	1.64129	0.714834	1.64129	1009.74	615.208	2.668e-10	6.9127e-09	4.91726	2.29785	4.91726	1009.74	205.346
TNNT2	troponin T2, cardiac type	TNNT2	TNNT2	protein_coding	0.000394214	0.00241625	0.287177	-1.79999	-3.48218	148.687	517.755	0.328504	0.672886	1.4071	0.492724	1.4071	728.532	517.755	6.31607e-06	7.46725e-05	4.89977	2.29271	4.89977	728.532	148.687
RSPH4A	radial spoke head component 4A	RSPH4A	RSPH4A	protein_coding	0.00840869	0.0304821	3.17507	1.66679	3.17507	25.8121	8.1296	0.078495	0.336648	2.19419	1.13369	2.19419	17.8379	8.1296	0.377197	0.594306	0.691067	-0.533103	-1.44704	17.8379	25.8121
MAN1C1	mannosidase alpha class 1C member 1	MAN1C1	MAN1C1	protein_coding	0.880348	0.930548	0.963901	-0.0530437	-1.03745	191.891	199.078	1.36811e-10	1.34827e-08	4.71159	2.23621	4.71159	937.972	199.078	5.42634e-11	1.54365e-09	4.88804	2.28926	4.88804	937.972	191.891
ENSCAFG00000049617	#N/A	ENSCAFG00000049617	---	protein_coding	0.00819435	0.0298305	3.14353	1.65238	3.14353	61.3887	19.5286	0.111618	0.404411	2.00595	1.00429	2.00595	39.1735	19.5286	0.291486	0.50939	0.638122	-0.648096	-1.5671	39.1735	61.3887
PRAG1	PEAK1 related, kinase-activating pseudokinase 1	PRAG1	PRAG1	protein_coding	1.70485e-07	2.5066e-06	0.2035	-2.2969	-4.914	328.191	1612.73	0.985262	0.996207	0.994416	-0.00807859	-1.00562	1603.72	1612.73	1.89396e-07	3.04202e-06	4.88656	2.28882	4.88656	1603.72	328.191
DHRS3	dehydrogenase/reductase 3	DHRS3	DHRS3	protein_coding	4.34484e-23	5.76402e-21	0.0420176	-4.57286	-23.7995	13.5159	321.672	3.99262e-08	2.5984e-06	0.205197	-2.28492	-4.87337	66.0062	321.672	1.26342e-06	1.71232e-05	4.88359	2.28794	4.88359	66.0062	13.5159
ANKRD33B	ankyrin repeat domain 33B	ANKRD33B	ANKRD33B	protein_coding	0.0156799	0.0499619	0.653888	-0.612885	-1.52931	247.556	378.592	2.08044e-11	2.39326e-09	3.18276	1.67028	3.18276	1204.97	378.592	1.15307e-19	7.72277e-18	4.86744	2.28316	4.86744	1204.97	247.556
GRAP2	GRB2 related adaptor protein 2	GRAP2	GRAP2	protein_coding	0.00151247	0.00738151	0.382776	-1.38543	-2.6125	25.1945	65.8206	0.0293115	0.188949	1.8611	0.896153	1.8611	122.498	65.8206	1.35158e-07	2.21206e-06	4.86211	2.28158	4.86211	122.498	25.1945
GPR155	G protein-coupled receptor 155	GPR155	GPR155	protein_coding	7.82427e-07	9.8227e-06	0.212352	-2.23547	-4.70915	82.4023	388.045	0.927948	0.980049	1.02829	0.0402537	1.02829	399.025	388.045	5.02614e-07	7.36153e-06	4.8424	2.27572	4.8424	399.025	82.4023
ECT2L	epithelial cell transforming 2 like	ECT2L	ECT2L	protein_coding	0.00119487	0.00604753	0.218482	-2.19442	-4.57704	7.94878	36.3819	0.90898	0.975817	1.05076	0.0714301	1.05076	38.2286	36.3819	0.000847363	0.00562298	4.80937	2.26585	4.80937	38.2286	7.94878
IL1RN	interleukin 1 receptor antagonist	IL1RN	IL1RN	protein_coding	1.95473e-08	3.48442e-07	0.214108	-2.22359	-4.67054	1060.71	4954.09	0.924666	0.979316	1.02624	0.0373749	1.02624	5084.11	4954.09	1.13012e-08	2.25647e-07	4.79312	2.26097	4.79312	5084.11	1060.71
ENSCAFG00000031706	#N/A	ENSCAFG00000031706	---	protein_coding	0.127423	0.251703	1.4827	0.568222	1.4827	1472.36	993.029	3.49731e-14	5.88443e-12	7.06952	2.82161	7.06952	7020.24	993.029	1.39455e-09	3.26666e-08	4.76802	2.25339	4.76802	7020.24	1472.36
ENSCAFG00000025131	#N/A	ENSCAFG00000025131	---	protein_coding	0.342223	0.508414	0.728376	-0.457245	-1.37292	528.467	725.542	0.000196143	0.00445095	3.45542	1.78886	3.45542	2507.06	725.542	2.99614e-06	3.77514e-05	4.74401	2.24611	4.74401	2507.06	528.467
PLXDC2	plexin domain containing 2	PLXDC2	PLXDC2	protein_coding	1.07293e-13	4.48582e-12	0.0516288	-4.27568	-19.369	287.615	5570.83	0.000392078	0.00780591	0.24422	-2.03375	-4.09467	1360.51	5570.83	9.84023e-05	0.000849598	4.73031	2.24193	4.73031	1360.51	287.615
SRGN	serglycin	SRGN	SRGN	protein_coding	0.000140774	0.00099603	0.475522	-1.07242	-2.10295	2557.16	5377.58	3.22764e-05	0.00102357	2.24926	1.16945	2.24926	12095.6	5377.58	1.72258e-15	8.42782e-14	4.73009	2.24187	4.73009	12095.6	2557.16
SSBP2	single stranded DNA binding protein 2	SSBP2	SSBP2	protein_coding	4.5777e-06	4.78474e-05	0.311415	-1.68309	-3.21114	66.7365	214.301	0.11841	0.417718	1.47007	0.555888	1.47007	315.038	214.301	1.0015e-09	2.39061e-08	4.72062	2.23898	4.72062	315.038	66.7365
IL1R2	interleukin 1 receptor type 2	IL1R2	IL1R2	protein_coding	3.97664e-07	5.37372e-06	0.189102	-2.40277	-5.28816	2380.93	12590.7	0.725912	0.910036	0.891284	-0.166044	-1.12198	11221.9	12590.7	2.36355e-06	3.03913e-05	4.71325	2.23672	4.71325	11221.9	2380.93
SMCO3	single-pass membrane protein with coiled-coil domains 3	SMCO3	SMCO3	protein_coding	0.91347	0.950922	0.938368	-0.0917749	-1.06568	7.49615	7.9885	0.00744438	0.0755221	4.41755	2.14325	4.41755	35.2896	7.9885	0.00577207	0.0281305	4.70769	2.23502	4.70769	35.2896	7.49615
ZFR2	zinc finger RNA binding protein 2	ZFR2	ZFR2	protein_coding	0.483362	0.641492	0.789558	-0.340882	-1.26653	199.867	253.137	0.000102862	0.00264103	3.67592	1.8781	3.67592	930.512	253.137	4.67912e-06	5.67291e-05	4.65566	2.21899	4.65566	930.512	199.867
NMNAT3	nicotinamide nucleotide adenylyltransferase 3	NMNAT3	NMNAT3	protein_coding	5.17529e-06	5.34947e-05	0.0946031	-3.40197	-10.5705	3.6325	38.3973	0.0644042	0.302264	0.440361	-1.18324	-2.27087	16.9087	38.3973	0.00372988	0.0195893	4.65482	2.21873	4.65482	16.9087	3.6325
RHBDL3	rhomboid like 3	RHBDL3	RHBDL3	protein_coding	1.91844e-14	8.82292e-13	0.0770227	-3.69857	-12.9832	39.0402	506.866	0.0015312	0.0232024	0.357323	-1.4847	-2.79859	181.115	506.866	5.25149e-06	6.30041e-05	4.63918	2.21387	4.63918	181.115	39.0402
ANPEP	alanyl aminopeptidase, membrane	ANPEP	ANPEP	protein_coding	1.228e-17	8.34616e-16	0.33603	-1.57334	-2.97593	801.73	2385.89	0.000472045	0.00908342	1.55489	0.636816	1.55489	3709.8	2385.89	2.80049e-33	4.65523e-31	4.62725	2.21016	4.62725	3709.8	801.73
SYTL1	synaptotagmin like 1	SYTL1	SYTL1	protein_coding	0.0102056	0.0356473	0.339656	-1.55786	-2.94416	22.4003	65.95	0.271237	0.622266	1.56387	0.645121	1.56387	103.137	65.95	0.000268821	0.00208016	4.60428	2.20298	4.60428	103.137	22.4003
GPR65	G protein-coupled receptor 65	GPR65	GPR65	protein_coding	1.30411e-38	4.49819e-36	0.236345	-2.08103	-4.2311	645.108	2729.51	0.440675	0.759516	1.08779	0.121402	1.08779	2969.14	2729.51	5.37009e-43	1.68389e-40	4.60255	2.20243	4.60255	2969.14	645.108
SPOCD1	SPOC domain containing 1	SPOCD1	SPOCD1	protein_coding	0.0188554	0.0576697	0.279325	-1.83998	-3.58006	3.60486	12.9056	0.595858	0.854307	1.28507	0.361847	1.28507	16.5846	12.9056	0.00482672	0.0242073	4.60063	2.20183	4.60063	16.5846	3.60486
EHD3	EH domain containing 3	EHD3	EHD3	protein_coding	0.00333521	0.0142818	0.417588	-1.25985	-2.3947	18.2605	43.7286	0.018362	0.140044	1.90323	0.928453	1.90323	83.2258	43.7286	2.29085e-07	3.59169e-06	4.55768	2.1883	4.55768	83.2258	18.2605
IZUMO4	IZUMO family member 4	IZUMO4	IZUMO4	protein_coding	0.0553361	0.134225	0.479675	-1.05987	-2.08474	35.0897	73.153	0.0366747	0.219114	2.18323	1.12646	2.18323	159.71	73.153	6.94323e-05	0.000623264	4.55148	2.18633	4.55148	159.71	35.0897
SLC9A9	solute carrier family 9 member A9	SLC9A9	SLC9A9	protein_coding	9.09452e-25	1.45904e-22	0.215618	-2.21345	-4.63783	328.187	1522.08	0.897231	0.972447	0.98124	-0.0273217	-1.01912	1493.52	1522.08	3.72505e-24	3.40361e-22	4.55082	2.18613	4.55082	1493.52	328.187
PRKCH	protein kinase C eta	PRKCH	PRKCH	protein_coding	0.000875615	0.00468432	0.565452	-0.822523	-1.7685	138.631	245.169	1.29002e-08	9.51785e-07	2.5682	1.36076	2.5682	629.642	245.169	4.15206e-19	2.67691e-17	4.54185	2.18328	4.54185	629.642	138.631
MID1	midline 1	MID1	MID1	protein_coding	4.94736e-10	1.20174e-08	0.158637	-2.6562	-6.3037	32.8952	207.361	0.245747	0.593127	0.720472	-0.472986	-1.38798	149.398	207.361	3.6748e-07	5.54112e-06	4.54164	2.18321	4.54164	149.398	32.8952
ENSCAFG00000049002	#N/A	ENSCAFG00000049002	---	protein_coding	5.0959e-05	0.000406406	2.95837	1.5648	2.95837	72.0303	24.348	0.0853891	0.352834	1.608	0.685266	1.608	39.1515	24.348	0.0197742	0.0753242	0.543542	-0.879537	-1.83979	39.1515	72.0303
LAMB3	laminin subunit beta 3	LAMB3	LAMB3	protein_coding	1.89248e-05	0.000168782	0.221196	-2.1766	-4.52087	22.851	103.306	0.989421	0.996541	1.00447	0.00643509	1.00447	103.768	103.306	1.86776e-05	0.000195075	4.54108	2.18304	4.54108	103.768	22.851
ENSCAFG00000032442	#N/A	ENSCAFG00000032442	---	protein_coding	0.000817557	0.00441827	2.95419	1.56276	2.95419	35.26	11.9356	0.222233	0.568946	1.51319	0.597589	1.51319	18.0608	11.9356	0.033688	0.11392	0.512217	-0.965172	-1.9523	18.0608	35.26
XYLT1	xylosyltransferase 1	XYLT1	XYLT1	protein_coding	2.59676e-43	1.15572e-40	0.187667	-2.41375	-5.32858	188.141	1002.53	0.147473	0.468929	0.846014	-0.241246	-1.18201	848.152	1002.53	3.90676e-35	7.38377e-33	4.50806	2.17251	4.50806	848.152	188.141
MAP3K5	mitogen-activated protein kinase kinase kinase 5	MAP3K5	MAP3K5	protein_coding	2.80541e-16	1.61276e-14	0.397367	-1.33146	-2.51657	423.129	1064.83	1.26012e-07	7.24413e-06	1.78908	0.839216	1.78908	1905.07	1064.83	7.48521e-41	1.98603e-38	4.50234	2.17067	4.50234	1905.07	423.129
ADAM8	ADAM metallopeptidase domain 8	ADAM8	ADAM8	protein_coding	4.21813e-08	6.95311e-07	0.182299	-2.45562	-5.4855	1701.66	9334.44	0.519494	0.810755	0.818859	-0.288312	-1.22121	7643.59	9334.44	1.31422e-06	1.77073e-05	4.49185	2.16731	4.49185	7643.59	1701.66
SPCS1	signal peptidase complex subunit 1	SPCS1	SPCS1	protein_coding	1.42979e-05	0.000131169	0.224312	-2.15642	-4.45808	11.9882	53.4441	0.981103	0.995342	1.00742	0.0106617	1.00742	53.8405	53.4441	1.41567e-05	0.000153192	4.49114	2.16708	4.49114	53.8405	11.9882
GPAT3	glycerol-3-phosphate acyltransferase 3	GPAT3	GPAT3	protein_coding	7.55726e-44	3.59543e-41	0.119453	-3.06548	-8.37149	497.991	4168.93	3.17709e-05	0.00101468	0.532988	-0.907826	-1.87622	2221.99	4168.93	1.7039e-22	1.35888e-20	4.4619	2.15766	4.4619	2221.99	497.991
DHRS9	dehydrogenase/reductase 9	DHRS9	DHRS9	protein_coding	0.773111	0.86369	0.86584	-0.207827	-1.15495	20.6494	23.849	0.00563789	0.0625811	3.85151	1.94542	3.85151	91.8545	23.849	0.00235747	0.013314	4.44829	2.15325	4.44829	91.8545	20.6494
SFXN4	sideroflexin 4	SFXN4	SFXN4	protein_coding	1.42838e-05	0.000131169	2.92887	1.55034	2.92887	190.668	65.0997	0.0356277	0.215689	1.69344	0.759957	1.69344	110.242	65.0997	0.025246	0.0908428	0.578189	-0.790386	-1.72954	110.242	190.668
C20H3orf18	#N/A	C20H3orf18	C20H3orf18	protein_coding	0.156665	0.292807	0.450345	-1.1509	-2.22052	6.01094	13.3474	0.185989	0.527555	2.00046	1.00033	2.00046	26.7009	13.3474	0.00721937	0.0337875	4.44206	2.15123	4.44206	26.7009	6.01094
TXNIP	thioredoxin interacting protein	TXNIP	TXNIP	protein_coding	6.33066e-07	8.12504e-06	0.281331	-1.82966	-3.55453	3095.82	11004.2	0.38451	0.718723	1.24766	0.319222	1.24766	13729.5	11004.2	4.92262e-09	1.04488e-07	4.43484	2.14888	4.43484	13729.5	3095.82
ETS1	ETS proto-oncogene 1, transcription factor	ETS1	ETS1	protein_coding	2.10935e-07	3.0201e-06	0.380156	-1.39534	-2.6305	124.668	327.94	0.00414323	0.0499251	1.67929	0.74785	1.67929	550.705	327.94	1.23674e-15	6.09406e-14	4.41737	2.14319	4.41737	550.705	124.668
STK17B	serine/threonine kinase 17b	STK17B	STK17B	protein_coding	5.36002e-15	2.66976e-13	0.323498	-1.62817	-3.09121	300.528	928.996	0.0119379	0.104931	1.42674	0.512722	1.42674	1325.44	928.996	7.6608e-25	7.19021e-23	4.41035	2.14089	4.41035	1325.44	300.528
CASS4	Cas scaffold protein family member 4	CASS4	CASS4	protein_coding	0.00186956	0.00880652	0.427421	-1.22627	-2.33962	172.383	403.311	0.019879	0.148247	1.87773	0.908987	1.87773	757.307	403.311	5.7847e-08	1.02061e-06	4.39316	2.13526	4.39316	757.307	172.383
RND1	Rho family GTPase 1	RND1	RND1	protein_coding	0.000114679	0.000834946	2.89471	1.53342	2.89471	69.3506	23.9577	0.0085856	0.082894	2.08654	1.06112	2.08654	49.9888	23.9577	0.217525	0.422585	0.720813	-0.472303	-1.38732	49.9888	69.3506
PHACTR1	phosphatase and actin regulator 1	PHACTR1	PHACTR1	protein_coding	2.91026e-09	6.09299e-08	0.312524	-1.67796	-3.19976	978.685	3131.56	0.105654	0.392625	1.37149	0.455747	1.37149	4294.91	3131.56	4.35963e-14	1.8063e-12	4.38845	2.13371	4.38845	4294.91	978.685
TPM2	tropomyosin 2	TPM2	TPM2	protein_coding	5.92761e-06	6.0179e-05	4.2341	2.08206	4.2341	36.3505	8.58516	7.0239e-07	3.57597e-05	4.83809	2.27444	4.83809	41.5358	8.58516	0.625917	0.791543	1.14265	0.192381	1.14265	41.5358	36.3505
CD1A8	#N/A	CD1A8	CD1A8	protein_coding	0.000876336	0.00468636	0.426099	-1.23074	-2.34687	1349.48	3167.06	0.0151332	0.122986	1.86242	0.897182	1.86242	5898.4	3167.06	8.6988e-09	1.76914e-07	4.37087	2.12792	4.37087	5898.4	1349.48
CP	ceruloplasmin	CP	CP	protein_coding	0.00929394	0.0330656	0.590696	-0.759511	-1.69292	139.063	235.422	1.73363e-06	7.90793e-05	2.57583	1.36504	2.57583	606.406	235.422	2.18222e-13	8.34017e-12	4.36067	2.12455	4.36067	606.406	139.063
KCNH4	potassium voltage-gated channel subfamily H member 4	KCNH4	KCNH4	protein_coding	0.0330671	0.0897556	0.486953	-1.03814	-2.05358	10.6518	21.8744	0.013256	0.112275	2.10523	1.07398	2.10523	46.0507	21.8744	8.37344e-06	9.59537e-05	4.32327	2.11212	4.32327	46.0507	10.6518
NIBAN1	niban apoptosis regulator 1	NIBAN1	NIBAN1	protein_coding	0.00809219	0.029519	0.728946	-0.456115	-1.37184	3375.05	4630.03	6.61309e-22	2.60688e-19	3.14448	1.65282	3.14448	14559	4630.03	1.53018e-34	2.81491e-32	4.31373	2.10894	4.31373	14559	3375.05
F2RL3	F2R like thrombin or trypsin receptor 3	F2RL3	F2RL3	protein_coding	0.0115606	0.039286	3.0784	1.62218	3.0784	34.5736	11.231	3.27724e-09	2.62787e-07	13.274	3.73054	13.274	149.081	11.231	0.000452628	0.00326446	4.31199	2.10835	4.31199	149.081	34.5736
PDCD4	programmed cell death 4	PDCD4	PDCD4	protein_coding	0.000124885	0.000898822	0.312391	-1.67857	-3.20111	332.835	1065.44	0.325371	0.669622	1.34585	0.428523	1.34585	1433.93	1065.44	1.46157e-06	1.94646e-05	4.30823	2.1071	4.30823	1433.93	332.835
CYCS	cytochrome c, somatic	CYCS	CYCS	protein_coding	3.5765e-06	3.86111e-05	2.81085	1.49101	2.81085	4947.56	1760.17	0.00975631	0.0904015	1.77989	0.831791	1.77989	3132.91	1760.17	0.0403322	0.130487	0.633223	-0.659215	-1.57922	3132.91	4947.56
DAPK2	death associated protein kinase 2	DAPK2	DAPK2	protein_coding	0.00615816	0.0237638	2.81028	1.49072	2.81028	84.3269	30.0065	0.030978	0.195967	2.26518	1.17963	2.26518	67.9703	30.0065	0.5609	0.745328	0.806034	-0.311088	-1.24064	67.9703	84.3269
CHST7	carbohydrate sulfotransferase 7	CHST7	CHST7	protein_coding	0.229604	0.383284	1.79431	0.84343	1.79431	8.67758	4.83616	0.000682569	0.0123913	4.8065	2.26499	4.8065	23.245	4.83616	0.0236114	0.0862274	2.67875	1.42156	2.67875	23.245	8.67758
CHN2	chimerin 2	CHN2	CHN2	protein_coding	2.9101e-06	3.21719e-05	0.341937	-1.5482	-2.92452	575.385	1682.72	0.0907654	0.364324	1.47173	0.55751	1.47173	2476.51	1682.72	1.97834e-10	5.22896e-09	4.30409	2.10571	4.30409	2476.51	575.385
MAN1A1	mannosidase alpha class 1A member 1	MAN1A1	MAN1A1	protein_coding	4.71031e-05	0.00037894	0.386404	-1.37182	-2.58796	2163.68	5599.51	0.0304303	0.193835	1.65728	0.728816	1.65728	9279.95	5599.51	4.60139e-10	1.15218e-08	4.28898	2.10063	4.28898	9279.95	2163.68
ENSCAFG00000049332	#N/A	ENSCAFG00000049332	---	protein_coding	0.0244202	0.0704424	0.330519	-1.59719	-3.02554	4.32123	13.0741	0.419038	0.743283	1.41415	0.499939	1.41415	18.4887	13.0741	0.00290592	0.0159036	4.27858	2.09713	4.27858	18.4887	4.32123
SPEF2	sperm flagellar 2	SPEF2	SPEF2	protein_coding	0.012687	0.0423833	2.79636	1.48355	2.79636	21.5055	7.69052	0.143422	0.46331	1.85975	0.895109	1.85975	14.3025	7.69052	0.301629	0.519094	0.665062	-0.58844	-1.50362	14.3025	21.5055
NMB	neuromedin B	NMB	NMB	protein_coding	0.233265	0.387428	0.537235	-0.896374	-1.86138	4.63877	8.63452	0.0759323	0.330838	2.28862	1.19448	2.28862	19.7612	8.63452	0.00409248	0.0211793	4.26	2.09085	4.26	19.7612	4.63877
PAX8	paired box 8	PAX8	PAX8	protein_coding	1.56439e-05	0.000142093	0.14046	-2.83176	-7.11944	25.7575	183.379	0.244485	0.592358	0.596783	-0.744722	-1.67565	109.438	183.379	0.00152069	0.00927953	4.24876	2.08704	4.24876	109.438	25.7575
SHROOM1	shroom family member 1	SHROOM1	SHROOM1	protein_coding	0.0597396	0.142206	0.35074	-1.51153	-2.85111	12.0452	34.3424	0.46061	0.771336	1.48667	0.572087	1.48667	51.0558	34.3424	0.00925436	0.0413345	4.23867	2.08361	4.23867	51.0558	12.0452
ENSCAFG00000023111	#N/A	ENSCAFG00000023111	---	protein_coding	5.70676e-09	1.13616e-07	0.250956	-1.99449	-3.98476	80.4516	320.58	0.795977	0.936623	1.06145	0.0860344	1.06145	340.28	320.58	1.2809e-09	3.01067e-08	4.22962	2.08053	4.22962	340.28	80.4516
CACNA1I	calcium voltage-gated channel subunit alpha1 I	CACNA1I	CACNA1I	protein_coding	0.000546708	0.00317882	0.223173	-2.16377	-4.48083	26.0518	116.734	0.890418	0.971348	0.943437	-0.0840026	-1.05995	110.131	116.734	0.000911951	0.00597445	4.22738	2.07976	4.22738	110.131	26.0518
NMUR1	neuromedin U receptor 1	NMUR1	NMUR1	protein_coding	0.00389926	0.0162434	0.377993	-1.40357	-2.64556	59.0071	156.106	0.156899	0.482018	1.59702	0.675382	1.59702	249.305	156.106	1.83499e-05	0.000192235	4.225	2.07895	4.225	249.305	59.0071
ENSCAFG00000010967	#N/A	ENSCAFG00000010967	---	protein_coding	0.00901773	0.0322576	2.76078	1.46508	2.76078	25.3533	9.18338	0.021481	0.155413	2.46496	1.30157	2.46496	22.6367	9.18338	0.75694	0.873581	0.89285	-0.16351	-1.12001	22.6367	25.3533
NRL	neural retina leucine zipper	NRL	NRL	protein_coding	0.404284	0.567619	0.785045	-0.349152	-1.27381	29.4127	37.4663	1.36004e-05	0.000486125	3.30992	1.7268	3.30992	124.01	37.4663	3.08003e-07	4.706e-06	4.21621	2.07595	4.21621	124.01	29.4127
JAKMIP1	janus kinase and microtubule interacting protein 1	JAKMIP1	JAKMIP1	protein_coding	5.10324e-05	0.000406756	0.300964	-1.73234	-3.32266	42.3498	140.714	0.409636	0.736672	1.26622	0.340525	1.26622	178.174	140.714	1.23296e-06	1.67597e-05	4.2072	2.07286	4.2072	178.174	42.3498
GPR183	G protein-coupled receptor 183	GPR183	GPR183	protein_coding	3.33067e-05	0.000280716	0.261483	-1.93521	-3.82433	58.2547	222.785	0.763261	0.926142	1.10003	0.137541	1.10003	245.07	222.785	8.91736e-06	0.000101512	4.20687	2.07275	4.20687	245.07	58.2547
CERCAM	cerebral endothelial cell adhesion molecule	CERCAM	CERCAM	protein_coding	0.00387146	0.0161519	0.270213	-1.88783	-3.70078	10.4243	38.5779	0.76649	0.926152	1.13477	0.182397	1.13477	43.7769	38.5779	0.00155495	0.00943435	4.19952	2.07023	4.19952	43.7769	10.4243
FANCC	FA complementation group C	FANCC	FANCC	protein_coding	0.000216745	0.00143978	0.393598	-1.34521	-2.54067	25.4155	64.5722	0.0313931	0.198048	1.64685	0.719707	1.64685	106.341	64.5722	9.69698e-09	1.95313e-07	4.18409	2.06491	4.18409	106.341	25.4155
MAN2A1	mannosidase alpha class 2A member 1	MAN2A1	MAN2A1	protein_coding	8.67088e-21	8.79648e-19	0.286381	-1.80399	-3.49185	2382.83	8320.48	0.175189	0.510255	1.19807	0.260715	1.19807	9968.54	8320.48	9.97782e-27	1.11019e-24	4.18348	2.06471	4.18348	9968.54	2382.83
CHST11	carbohydrate sulfotransferase 11	CHST11	CHST11	protein_coding	0.000346364	0.00216039	0.542831	-0.881424	-1.84219	1115.73	2055.38	1.55804e-06	7.16542e-05	2.26398	1.17886	2.26398	4653.34	2055.38	5.66598e-17	3.08987e-15	4.17069	2.06029	4.17069	4653.34	1115.73
ZMYND10	zinc finger MYND-type containing 10	ZMYND10	ZMYND10	protein_coding	0.0672811	0.155803	0.456936	-1.12993	-2.18849	7.06305	15.4574	0.0938911	0.370648	1.9048	0.929643	1.9048	29.4433	15.4574	0.000663505	0.00458177	4.16864	2.05958	4.16864	29.4433	7.06305
TENT5B	terminal nucleotidyltransferase 5B	TENT5B	TENT5B	protein_coding	0.000108441	0.000793295	0.231644	-2.11002	-4.31696	13.3869	57.7908	0.909849	0.975915	0.960888	-0.0575598	-1.0407	55.5305	57.7908	0.000177929	0.00145002	4.14812	2.05246	4.14812	55.5305	13.3869
ACTN1	actinin alpha 1	ACTN1	ACTN1	protein_coding	0.952871	0.972518	0.986603	-0.0194582	-1.01358	1519.06	1539.69	6.2452e-10	5.5234e-08	4.09246	2.03297	4.09246	6301.13	1539.69	4.32517e-10	1.08696e-08	4.14803	2.05243	4.14803	6301.13	1519.06
ENSCAFG00000001866	#N/A	ENSCAFG00000001866	---	protein_coding	1.03389e-11	3.19832e-10	0.224315	-2.1564	-4.45801	47.5669	212.054	0.708384	0.904134	0.925324	-0.11197	-1.0807	196.218	212.054	1.3563e-10	3.65487e-09	4.1251	2.04443	4.1251	196.218	47.5669
RGS11	regulator of G protein signaling 11	RGS11	RGS11	protein_coding	0.00209203	0.00971518	0.182374	-2.45503	-5.48323	15.7097	86.1396	0.595485	0.854133	0.751324	-0.412494	-1.33098	64.7187	86.1396	0.0107371	0.0463953	4.11968	2.04253	4.11968	64.7187	15.7097
CCL3	C-C motif chemokine ligand 3	CCL3	CCL3	protein_coding	0.413871	0.577661	0.644274	-0.634254	-1.55214	2419.36	3755.17	0.0697188	0.315587	2.653	1.40763	2.653	9962.47	3755.17	0.00852137	0.0385853	4.11782	2.04188	4.11782	9962.47	2419.36
FMO5	flavin containing dimethylaniline monoxygenase 5	FMO5	FMO5	protein_coding	2.21025e-05	0.00019404	0.424616	-1.23577	-2.35507	339.818	800.294	0.00531213	0.059781	1.74665	0.804594	1.74665	1397.84	800.294	2.30784e-12	7.69113e-11	4.11349	2.04036	4.11349	1397.84	339.818
RHOH	ras homolog family member H	RHOH	RHOH	protein_coding	1.13069e-05	0.000106854	3.3336	1.73708	3.3336	381.504	114.442	7.82816e-08	4.77899e-06	4.35569	2.1229	4.35569	498.474	114.442	0.323168	0.540979	1.3066	0.385821	1.3066	498.474	381.504
ASPHD1	aspartate beta-hydroxylase domain containing 1	ASPHD1	ASPHD1	protein_coding	0.614137	0.746982	1.25037	0.322353	1.25037	12.6921	10.1507	0.000102253	0.00263684	5.12451	2.35741	5.12451	52.0174	10.1507	0.000706267	0.00482066	4.0984	2.03506	4.0984	52.0174	12.6921
CD163	CD163 molecule	CD163	CD163	protein_coding	3.84576e-19	3.19638e-17	0.200491	-2.31839	-4.98774	9559.15	47678.6	0.272332	0.623422	0.821053	-0.284454	-1.21795	39146.6	47678.6	4.35497e-15	2.02992e-13	4.0952	2.03393	4.0952	39146.6	9559.15
STAT4	signal transducer and activator of transcription 4	STAT4	STAT4	protein_coding	1.01585e-08	1.91996e-07	5.23261	2.38753	5.23261	758.806	145.015	3.59646e-07	1.91584e-05	4.35563	2.12288	4.35563	631.632	145.015	0.521621	0.715672	0.832402	-0.264647	-1.20134	631.632	758.806
EHF	ETS homologous factor	EHF	EHF	protein_coding	0.100178	0.210278	0.424453	-1.23632	-2.35598	10.6376	25.062	0.27027	0.621485	1.73238	0.792753	1.73238	43.4168	25.062	0.00658876	0.0313142	4.08144	2.02908	4.08144	43.4168	10.6376
MORN1	MORN repeat containing 1	MORN1	MORN1	protein_coding	0.003218	0.0138963	2.63008	1.3951	2.63008	33.4999	12.7372	0.375838	0.71251	1.35651	0.439897	1.35651	17.2782	12.7372	0.0407551	0.131439	0.515767	-0.955208	-1.93886	17.2782	33.4999
CPAMD8	C3 and PZP like alpha-2-macroglobulin domain containing 8	CPAMD8	CPAMD8	protein_coding	2.19167e-05	0.000192602	0.111486	-3.16507	-8.96976	10.1563	91.0992	0.109952	0.400234	0.454954	-1.13621	-2.19802	41.446	91.0992	0.00707106	0.0332393	4.08083	2.02886	4.08083	41.446	10.1563
ZNRF3	zinc and ring finger 3	ZNRF3	ZNRF3	protein_coding	9.94457e-05	0.000737927	0.378352	-1.4022	-2.64304	52.0458	137.559	0.0711753	0.319309	1.54197	0.624777	1.54197	212.113	137.559	1.62065e-08	3.14931e-07	4.0755	2.02698	4.0755	212.113	52.0458
NDUFA13	NADH:ubiquinone oxidoreductase subunit A13	NDUFA13	NDUFA13	protein_coding	0.00326409	0.0140429	2.61721	1.38803	2.61721	50.6382	19.3482	0.278676	0.630156	1.44	0.526073	1.44	27.8615	19.3482	0.0642354	0.185215	0.550207	-0.861954	-1.8175	27.8615	50.6382
SNCAIP	synuclein alpha interacting protein	SNCAIP	SNCAIP	protein_coding	2.05282e-05	0.000181439	0.230217	-2.11894	-4.34373	13.5798	58.9869	0.837518	0.951818	0.936992	-0.093891	-1.06724	55.2703	58.9869	5.20319e-05	0.000482125	4.07004	2.02504	4.07004	55.2703	13.5798
MAPK15	mitogen-activated protein kinase 15	MAPK15	MAPK15	protein_coding	0.0935298	0.199881	0.399727	-1.32291	-2.50171	3.78226	9.46211	0.318742	0.664076	1.61949	0.695536	1.61949	15.3238	9.46211	0.00943298	0.0419423	4.05148	2.01845	4.05148	15.3238	3.78226
TMCO6	transmembrane and coiled-coil domains 6	TMCO6	TMCO6	protein_coding	3.67823e-09	7.58572e-08	0.451888	-1.14596	-2.21294	669.324	1481.17	6.65132e-06	0.000265995	1.82289	0.866229	1.82289	2700.02	1481.17	3.23487e-25	3.07803e-23	4.03394	2.01219	4.03394	2700.02	669.324
WWC3	WWC family member 3	WWC3	WWC3	protein_coding	0.0571669	0.137635	0.354855	-1.4947	-2.81806	9.94156	28.0159	0.491823	0.792687	1.4311	0.517124	1.4311	40.0935	28.0159	0.0102357	0.0447331	4.03292	2.01182	4.03292	40.0935	9.94156
DNAJB13	DnaJ heat shock protein family (Hsp40) member B13	DNAJB13	DNAJB13	protein_coding	1.94166e-06	2.22871e-05	0.161028	-2.63462	-6.21012	17.4452	108.337	0.235618	0.582514	0.648778	-0.624203	-1.54136	70.2866	108.337	0.000314618	0.00238767	4.02899	2.01042	4.02899	70.2866	17.4452
SEMA3C	semaphorin 3C	SEMA3C	SEMA3C	protein_coding	0.00527339	0.0208952	0.386587	-1.37113	-2.58674	501.809	1298.05	0.197124	0.541006	1.5503	0.632544	1.5503	2012.36	1298.05	4.54801e-05	0.000429199	4.01021	2.00368	4.01021	2012.36	501.809
TMEM47	transmembrane protein 47	TMEM47	TMEM47	protein_coding	4.48701e-12	1.46008e-10	0.0626095	-3.99747	-15.972	19.8369	316.835	0.000324118	0.00668438	0.250971	-1.99441	-3.98452	79.5164	316.835	0.000604206	0.0042273	4.00852	2.00307	4.00852	79.5164	19.8369
ENSCAFG00000024399	#N/A	ENSCAFG00000024399	---	protein_coding	0.0127289	0.0424615	2.58788	1.37177	2.58788	22.8122	8.81502	0.15207	0.474662	1.75505	0.811508	1.75505	15.4708	8.81502	0.289635	0.50744	0.678179	-0.560261	-1.47454	15.4708	22.8122
ENSCAFG00000010721	#N/A	ENSCAFG00000010721	---	protein_coding	1.76367e-16	1.02672e-14	0.169076	-2.56425	-5.91449	46.6469	275.893	0.0542822	0.275556	0.676367	-0.564121	-1.47849	186.605	275.893	1.91834e-10	5.08987e-09	4.00036	2.00013	4.00036	186.605	46.6469
RANGRF	RAN guanine nucleotide release factor	RANGRF	RANGRF	protein_coding	0.000106663	0.000781536	2.5724	1.36312	2.5724	546.118	212.299	0.135042	0.448312	1.44218	0.52825	1.44218	306.173	212.299	0.0173985	0.0680983	0.560635	-0.834867	-1.78369	306.173	546.118
CCDC83	coiled-coil domain containing 83	CCDC83	CCDC83	protein_coding	0.00149597	0.00732121	0.226282	-2.1438	-4.41926	3.75552	16.5966	0.793914	0.935693	0.902638	-0.147781	-1.10786	14.9807	16.5966	0.00351967	0.0186271	3.98899	1.99602	3.98899	14.9807	3.75552
TSPAN12	tetraspanin 12	TSPAN12	TSPAN12	protein_coding	0.0160666	0.0510174	0.308185	-1.69813	-3.24481	31.2166	101.292	0.670422	0.886279	1.22705	0.2952	1.22705	124.29	101.292	0.00470905	0.0237206	3.98155	1.99333	3.98155	124.29	31.2166
C18H11orf49	#N/A	C18H11orf49	C18H11orf49	protein_coding	0.000662458	0.00371996	0.504289	-0.987676	-1.98299	109.17	216.483	0.000362717	0.00733473	2.00729	1.00525	2.00729	434.544	216.483	4.58245e-12	1.48413e-10	3.98042	1.99292	3.98042	434.544	109.17
S1PR1	sphingosine-1-phosphate receptor 1	S1PR1	S1PR1	protein_coding	1.14166e-17	7.79778e-16	0.0500157	-4.32148	-19.9937	63.8766	1277.13	2.52296e-06	0.000110156	0.197719	-2.33848	-5.05768	252.513	1277.13	9.28022e-05	0.000808839	3.95314	1.983	3.95314	252.513	63.8766
MAML3	mastermind like transcriptional coactivator 3	MAML3	MAML3	protein_coding	1.04626e-10	2.836e-09	0.157716	-2.6646	-6.34053	532.458	3376.07	0.0930149	0.368349	0.619506	-0.69081	-1.61419	2091.49	3376.07	1.72652e-06	2.27081e-05	3.928	1.97379	3.928	2091.49	532.458
ENSCAFG00000023772	#N/A	ENSCAFG00000023772	---	protein_coding	0.0150722	0.0484623	2.54072	1.34524	2.54072	100.951	39.7332	0.308274	0.65655	1.48378	0.56928	1.48378	58.9555	39.7332	0.158784	0.34467	0.584001	-0.775957	-1.71233	58.9555	100.951
HIVEP1	HIVEP zinc finger 1	HIVEP1	HIVEP1	protein_coding	3.91108e-20	3.77351e-18	0.326515	-1.61478	-3.06265	1133.44	3471.33	0.0408274	0.232767	1.28046	0.356663	1.28046	4444.9	3471.33	3.20319e-29	3.98148e-27	3.9216	1.97144	3.9216	4444.9	1133.44
ZNF395	zinc finger protein 395	ZNF395	ZNF395	protein_coding	7.19405e-08	1.1528e-06	0.161876	-2.62704	-6.17757	35.745	220.817	0.164516	0.495	0.634039	-0.657357	-1.57719	140.007	220.817	5.89169e-05	0.000539401	3.91682	1.96968	3.91682	140.007	35.745
KIAA0895	KIAA0895	KIAA0895	KIAA0895	protein_coding	0.000118514	0.000858792	0.167484	-2.5779	-5.97071	4.71428	28.1476	0.296832	0.645882	0.655515	-0.609299	-1.52552	18.4512	28.1476	0.00396333	0.0206037	3.91389	1.9686	3.91389	18.4512	4.71428
FILIP1L	filamin A interacting protein 1 like	FILIP1L	FILIP1L	protein_coding	1.92051e-44	9.81379e-42	0.137386	-2.86369	-7.27876	192.792	1403.28	6.06635e-06	0.000244016	0.537226	-0.8964	-1.86141	753.88	1403.28	1.33573e-21	1.00705e-19	3.91034	1.96729	3.91034	753.88	192.792
BCAR3	BCAR3 adaptor protein, NSP family member	BCAR3	BCAR3	protein_coding	0.0635192	0.149018	0.699938	-0.5147	-1.4287	129.761	185.39	7.91996e-08	4.81373e-06	2.73401	1.45102	2.73401	506.856	185.39	7.18722e-13	2.57564e-11	3.90607	1.96572	3.90607	506.856	129.761
ENSCAFG00000003956	#N/A	ENSCAFG00000003956	---	protein_coding	9.59264e-05	0.000716566	2.52444	1.33596	2.52444	105.928	41.9608	0.00937452	0.087867	1.8676	0.901185	1.8676	78.366	41.9608	0.193582	0.391035	0.739808	-0.434778	-1.3517	78.366	105.928
EXD1	exonuclease 3'-5' domain containing 1	EXD1	EXD1	protein_coding	2.31129e-08	4.04168e-07	0.131681	-2.92489	-7.59413	41.1051	312.157	0.0597606	0.290835	0.512969	-0.963057	-1.94944	160.127	312.157	0.000192158	0.00155314	3.89555	1.96183	3.89555	160.127	41.1051
CCDC113	coiled-coil domain containing 113	CCDC113	CCDC113	protein_coding	0.00891463	0.0319771	2.51878	1.33272	2.51878	46.5684	18.4885	0.725174	0.909906	1.13773	0.186161	1.13773	21.035	18.4885	0.0248785	0.0899262	0.4517	-1.14656	-2.21386	21.035	46.5684
ME3	malic enzyme 3	ME3	ME3	protein_coding	5.07246e-09	1.01427e-07	0.0719345	-3.79717	-13.9015	59.4922	827.033	0.00431177	0.0512399	0.280201	-1.83546	-3.56886	231.736	827.033	0.00260571	0.0144964	3.89523	1.96171	3.89523	231.736	59.4922
GGN	gametogenetin	GGN	GGN	protein_coding	0.000978856	0.00513118	0.214498	-2.22096	-4.66204	5.93477	27.6681	0.665478	0.885583	0.833612	-0.262552	-1.1996	23.0645	27.6681	0.00403035	0.0209048	3.88633	1.95841	3.88633	23.0645	5.93477
EPN2	epsin 2	EPN2	EPN2	protein_coding	1.66554e-17	1.11012e-15	0.336496	-1.57134	-2.97181	451.281	1341.12	0.0373335	0.221439	1.29935	0.377786	1.29935	1742.58	1341.12	4.24375e-26	4.43568e-24	3.8614	1.94913	3.8614	1742.58	451.281
ABHD15	abhydrolase domain containing 15	ABHD15	ABHD15	protein_coding	7.46811e-08	1.1857e-06	0.150498	-2.73218	-6.6446	140.444	933.193	0.118899	0.418431	0.579786	-0.786407	-1.72477	541.052	933.193	0.0001303	0.00109887	3.85245	1.94578	3.85245	541.052	140.444
CHRNA9	cholinergic receptor nicotinic alpha 9 subunit	CHRNA9	CHRNA9	protein_coding	0.645107	0.771011	1.18797	0.248493	1.18797	45.2239	38.0683	3.37897e-05	0.00106437	4.57523	2.19384	4.57523	174.171	38.0683	0.000229554	0.00181707	3.85132	1.94535	3.85132	174.171	45.2239
ENSCAFG00000023735	#N/A	ENSCAFG00000023735	---	protein_coding	1.75036e-06	2.02259e-05	0.432988	-1.2076	-2.30953	3716.89	8584.29	0.00380541	0.0469618	1.65892	0.730244	1.65892	14240.6	8584.29	1.69985e-14	7.3751e-13	3.83133	1.93785	3.83133	14240.6	3716.89
MMACHC	metabolism of cobalamin associated C	MMACHC	MMACHC	protein_coding	0.00915095	0.0326326	2.49643	1.31987	2.49643	46.0578	18.4495	0.126797	0.433132	1.72418	0.785907	1.72418	31.8101	18.4495	0.281523	0.498673	0.690656	-0.533961	-1.4479	31.8101	46.0578
GPN1	GPN-loop GTPase 1	GPN1	GPN1	protein_coding	0.0115829	0.0393425	2.49161	1.31708	2.49161	220.258	88.3997	0.893595	0.971523	1.05002	0.0704152	1.05002	92.8214	88.3997	0.0170684	0.067073	0.421422	-1.24666	-2.37292	92.8214	220.258
ENSCAFG00000004298	#N/A	ENSCAFG00000004298	---	protein_coding	0.216445	0.368225	0.539163	-0.891207	-1.85473	10.1783	18.878	0.128012	0.435135	2.06186	1.04395	2.06186	38.9238	18.878	0.00650868	0.0310084	3.82419	1.93515	3.82419	38.9238	10.1783
ARHGEF3	Rho guanine nucleotide exchange factor 3	ARHGEF3	ARHGEF3	protein_coding	3.93019e-06	4.18079e-05	2.48741	1.31464	2.48741	261.56	105.154	0.0217303	0.156642	1.58143	0.661227	1.58143	166.293	105.154	0.020614	0.077708	0.635774	-0.653415	-1.57289	166.293	261.56
DTHD1	death domain containing 1	DTHD1	DTHD1	protein_coding	0.674057	0.790948	1.2129	0.278457	1.2129	9.156	7.54887	0.00035927	0.00727878	4.62648	2.20991	4.62648	34.9247	7.54887	0.00163665	0.00985632	3.8144	1.93146	3.8144	34.9247	9.156
TCF23	transcription factor 23	TCF23	TCF23	protein_coding	1.02142e-05	9.81373e-05	0.198462	-2.33306	-5.03874	69.1064	348.209	0.437231	0.756694	0.755048	-0.405359	-1.32442	262.915	348.209	0.000273679	0.00211301	3.80449	1.9277	3.80449	262.915	69.1064
IL23A	interleukin 23 subunit alpha	IL23A	IL23A	protein_coding	0.0787751	0.175668	0.498754	-1.0036	-2.005	60.0368	120.374	0.10389	0.389927	1.88755	0.916512	1.88755	227.211	120.374	0.000743489	0.0050112	3.78453	1.92011	3.78453	227.211	60.0368
IL1A	interleukin 1 alpha	IL1A	IL1A	protein_coding	0.0808165	0.178633	0.524618	-0.930662	-1.90615	180.919	344.859	0.0622286	0.297391	1.9849	0.989068	1.9849	684.511	344.859	0.000310909	0.002368	3.78352	1.91973	3.78352	684.511	180.919
ZNF697	zinc finger protein 697	ZNF697	--- | ZNF697	--- | protein_coding	0.0662817	0.153952	0.809847	-0.304278	-1.2348	489.908	604.938	3.30241e-23	1.62726e-20	3.06003	1.61355	3.06003	1851.13	604.938	1.15807e-31	1.69977e-29	3.77853	1.91782	3.77853	1851.13	489.908
SFXN5	sideroflexin 5	SFXN5	SFXN5	protein_coding	0.485646	0.643788	0.825989	-0.275805	-1.21067	54.7786	66.3187	1.92334e-05	0.000658469	3.1176	1.64044	3.1176	206.755	66.3187	7.90132e-07	1.1204e-05	3.77439	1.91624	3.77439	206.755	54.7786
SMTNL2	smoothelin like 2	SMTNL2	SMTNL2	protein_coding	0.000102092	0.000753646	0.217112	-2.20349	-4.60592	16.4259	75.6566	0.594422	0.853673	0.819445	-0.287281	-1.22034	61.9964	75.6566	0.000782376	0.00525277	3.7743	1.91621	3.7743	61.9964	16.4259
RNF125	ring finger protein 125	RNF125	RNF125	protein_coding	6.31408e-06	6.36809e-05	0.27145	-1.88124	-3.68392	38.4849	141.775	0.931342	0.980873	1.02422	0.0345213	1.02422	145.208	141.775	4.46483e-06	5.43221e-05	3.77313	1.91576	3.77313	145.208	38.4849
OSCP1	organic solute carrier partner 1	OSCP1	OSCP1	protein_coding	0.0336296	0.0908355	0.342384	-1.54631	-2.9207	3.67302	10.7278	0.557343	0.832532	1.29082	0.36829	1.29082	13.8477	10.7278	0.00823795	0.0377104	3.7701	1.9146	3.7701	13.8477	3.67302
MEFV	MEFV innate immuity regulator, pyrin	MEFV	MEFV	protein_coding	6.42739e-45	3.69494e-42	0.217155	-2.2032	-4.605	603.982	2781.34	0.0589786	0.288249	0.817526	-0.290663	-1.2232	2273.82	2781.34	3.8435e-34	6.97748e-32	3.76471	1.91254	3.76471	2273.82	603.982
P2RY1	purinergic receptor P2Y1	P2RY1	P2RY1	protein_coding	0.724901	0.828019	0.890434	-0.16742	-1.12305	31.5986	35.4867	0.00014413	0.00348494	3.34963	1.744	3.34963	118.867	35.4867	3.73185e-05	0.000359304	3.76179	1.91142	3.76179	118.867	31.5986
GCHFR	GTP cyclohydrolase I feedback regulator	GCHFR	GCHFR	protein_coding	1.1897e-05	0.00011151	2.42809	1.27982	2.42809	371.786	153.119	0.0213398	0.154888	1.59926	0.677408	1.59926	244.878	153.119	0.038063	0.125126	0.658652	-0.602411	-1.51825	244.878	371.786
STAB1	stabilin 1	STAB1	STAB1	protein_coding	2.62307e-19	2.20674e-17	0.275261	-1.86113	-3.63291	15121.9	54936.5	0.813827	0.943288	1.03437	0.0487586	1.03437	56824.9	54936.5	3.0115e-20	2.10912e-18	3.75779	1.90988	3.75779	56824.9	15121.9
GDPD3	glycerophosphodiester phosphodiesterase domain containing 3	GDPD3	GDPD3	protein_coding	0.00102219	0.00531392	0.395764	-1.33729	-2.52676	35.1722	88.8715	0.146401	0.467992	1.47991	0.565506	1.47991	131.522	88.8715	2.69969e-06	3.42664e-05	3.73936	1.90279	3.73936	131.522	35.1722
CA5B	carbonic anhydrase 5B	CA5B	CA5B	protein_coding	1.24472e-07	1.87278e-06	0.320557	-1.64135	-3.11957	21.1564	65.9988	0.343067	0.68563	1.19416	0.255995	1.19416	78.8131	65.9988	9.80805e-10	2.34526e-08	3.72526	1.89734	3.72526	78.8131	21.1564
CD164L2	CD164 molecule like 2	CD164L2	CD164L2	protein_coding	2.87545e-05	0.000246107	0.157886	-2.66304	-6.33367	12.2982	77.893	0.203662	0.549321	0.587313	-0.7678	-1.70267	45.7476	77.893	0.00321269	0.0172614	3.71984	1.89524	3.71984	45.7476	12.2982
SUGCT	succinyl-CoA:glutarate-CoA transferase	SUGCT	SUGCT	protein_coding	0.000225676	0.00148972	0.267901	-1.90023	-3.73272	51.3469	191.663	0.974038	0.99242	0.988657	-0.0164581	-1.01147	189.489	191.663	0.000260588	0.00201758	3.69037	1.88377	3.69037	189.489	51.3469
ADGRB2	adhesion G protein-coupled receptor B2	ADGRB2	ADGRB2	protein_coding	0.541047	0.688891	0.877905	-0.187863	-1.13907	56.5842	64.4537	7.34297e-09	5.53612e-07	3.2337	1.69319	3.2337	208.424	64.4537	2.44254e-10	6.37047e-09	3.68343	1.88105	3.68343	208.424	56.5842
SYDE1	synapse defective Rho GTPase homolog 1	SYDE1	SYDE1	protein_coding	0.00541981	0.021371	2.40262	1.26461	2.40262	491.319	204.494	0.359493	0.699113	1.33611	0.418041	1.33611	273.226	204.494	0.062446	0.18165	0.556107	-0.846566	-1.79822	273.226	491.319
CNTLN	centlein	CNTLN	CNTLN	protein_coding	0.00042624	0.00258726	2.40105	1.26366	2.40105	231.995	96.6222	0.070243	0.317131	1.57375	0.654207	1.57375	152.059	96.6222	0.0873085	0.230577	0.655443	-0.609457	-1.52568	152.059	231.995
DUSP2	dual specificity phosphatase 2	DUSP2	DUSP2	protein_coding	0.00178958	0.00849259	2.40083	1.26353	2.40083	355.777	148.189	0.00504583	0.0580145	2.19726	1.1357	2.19726	325.609	148.189	0.750593	0.870576	0.915207	-0.127829	-1.09265	325.609	355.777
TANC1	tetratricopeptide repeat, ankyrin repeat and coiled-coil containing 1	TANC1	TANC1	protein_coding	0.000410917	0.00250527	0.345978	-1.53125	-2.89036	109.828	317.441	0.415647	0.741777	1.27326	0.348523	1.27326	404.184	317.441	1.43538e-05	0.00015484	3.68017	1.87977	3.68017	404.184	109.828
RASL10B	RAS like family 10 member B	RASL10B	RASL10B	protein_coding	0.127429	0.251703	0.482179	-1.05236	-2.07392	21.1483	43.86	0.22152	0.568299	1.76909	0.823004	1.76909	77.592	43.86	0.00633787	0.0304046	3.66894	1.87536	3.66894	77.592	21.1483
SLC46A3	solute carrier family 46 member 3	SLC46A3	SLC46A3	protein_coding	1.07206e-05	0.000102271	2.3881	1.25587	2.3881	15764.1	6601.09	0.0059348	0.0645761	1.72311	0.785014	1.72311	11374.4	6601.09	0.0987771	0.251723	0.721538	-0.470852	-1.38593	11374.4	15764.1
CERS6	ceramide synthase 6	CERS6	CERS6	protein_coding	0.00323371	0.0139435	2.38618	1.2547	2.38618	153.755	64.4357	0.597692	0.854732	1.17139	0.228218	1.17139	75.4792	64.4357	0.016054	0.0639424	0.490906	-1.02648	-2.03705	75.4792	153.755
NAV3	neuron navigator 3	NAV3	NAV3	protein_coding	1.20135e-11	3.66705e-10	0.351286	-1.50928	-2.84669	163.683	465.953	0.0896785	0.361621	1.28881	0.366038	1.28881	600.524	465.953	3.39679e-17	1.88215e-15	3.66883	1.87532	3.66883	600.524	163.683
LETM2	leucine zipper and EF-hand containing transmembrane protein 2	LETM2	LETM2	protein_coding	0.135534	0.263523	0.559889	-0.836788	-1.78607	21.9703	39.2405	0.0551109	0.277203	2.05062	1.03606	2.05062	80.4672	39.2405	0.000732999	0.00495259	3.66254	1.87285	3.66254	80.4672	21.9703
CASK	calcium/calmodulin dependent serine protein kinase	CASK	CASK	protein_coding	0.000803029	0.00434998	2.38199	1.25217	2.38199	1280.41	537.536	0.0675176	0.309997	1.60636	0.683793	1.60636	863.475	537.536	0.127742	0.299685	0.674375	-0.568376	-1.48285	863.475	1280.41
IL10	interleukin 10	IL10	IL10	protein_coding	0.000267692	0.00172425	0.338288	-1.56367	-2.95606	951.052	2811.36	0.480715	0.784657	1.23293	0.302092	1.23293	3466.22	2811.36	1.3685e-05	0.000149376	3.64461	1.86577	3.64461	3466.22	951.052
CSF2RB	colony stimulating factor 2 receptor subunit beta	CSF2RB	CSF2RB	protein_coding	0.0033865	0.0144589	0.543597	-0.879391	-1.8396	16624	30581.5	0.00101798	0.0168205	1.98046	0.985838	1.98046	60565.4	30581.5	5.12968e-10	1.27751e-08	3.64326	1.86523	3.64326	60565.4	16624
CREB5	cAMP responsive element binding protein 5	CREB5	CREB5	protein_coding	8.6086e-11	2.38022e-09	0.266395	-1.90836	-3.75382	106.564	400.024	0.858017	0.958589	0.965148	-0.051178	-1.03611	386.083	400.024	2.94467e-10	7.59394e-09	3.623	1.85718	3.623	386.083	106.564
RAB38	RAB38, member RAS oncogene family	RAB38	RAB38	protein_coding	0.00322082	0.0139041	0.31226	-1.67918	-3.20246	5.32766	17.0616	0.718604	0.907689	1.12809	0.173887	1.12809	19.2471	17.0616	0.00118971	0.00755036	3.61268	1.85307	3.61268	19.2471	5.32766
COL15A1	collagen type XV alpha 1 chain	COL15A1	COL15A1	protein_coding	2.28968e-22	2.74702e-20	0.234839	-2.09025	-4.25823	215.815	918.991	0.254306	0.604622	0.847471	-0.238764	-1.17998	778.819	918.991	8.63824e-18	5.02877e-16	3.60873	1.85149	3.60873	778.819	215.815
TMCC2	transmembrane and coiled-coil domain family 2	TMCC2	TMCC2	protein_coding	1.31366e-10	3.52619e-09	0.211471	-2.24147	-4.72879	307.5	1454.1	0.25245	0.602604	0.759675	-0.396546	-1.31635	1104.64	1454.1	1.26729e-07	2.08152e-06	3.59234	1.84492	3.59234	1104.64	307.5
GRK5	G protein-coupled receptor kinase 5	GRK5	GRK5	protein_coding	4.64566e-07	6.18688e-06	0.329494	-1.60167	-3.03495	222.365	674.868	0.449292	0.764414	1.17917	0.237768	1.17917	795.782	674.868	7.11985e-09	1.47496e-07	3.57872	1.83944	3.57872	795.782	222.365
CISD3	CDGSH iron sulfur domain 3	CISD3	CISD3	protein_coding	0.0526033	0.129163	0.622119	-0.684738	-1.60741	355.078	570.756	0.00115108	0.0184571	2.20707	1.14213	2.20707	1259.7	570.756	2.20435e-07	3.47185e-06	3.54767	1.82687	3.54767	1259.7	355.078
APEX1	apurinic/apyrimidinic endodeoxyribonuclease 1	APEX1	APEX1	protein_coding	3.03275e-05	0.000258449	2.35397	1.2351	2.35397	2071.87	880.162	0.0157377	0.126387	1.64244	0.715841	1.64244	1445.61	880.162	0.0791631	0.215003	0.697732	-0.519254	-1.43321	1445.61	2071.87
MEIS1	Meis homeobox 1	MEIS1	MEIS1	protein_coding	0.00885307	0.0318254	0.281262	-1.83001	-3.5554	5.19532	18.4715	0.994658	0.997912	0.997087	-0.00420864	-1.00292	18.4176	18.4715	0.00948729	0.0421566	3.54504	1.8258	3.54504	18.4176	5.19532
TNIP3	TNFAIP3 interacting protein 3	TNIP3	TNIP3	protein_coding	2.49997e-06	2.79968e-05	0.176914	-2.49888	-5.65246	12.9789	73.3627	0.1688	0.502036	0.624139	-0.68006	-1.60221	45.7885	73.3627	0.000725087	0.00491116	3.52792	1.81882	3.52792	45.7885	12.9789
STN1	STN1 subunit of CST complex	STN1	STN1	protein_coding	3.55261e-06	3.84434e-05	3.97245	1.99003	3.97245	143.212	36.0514	2.52051e-06	0.000110156	4.06092	2.02181	4.06092	146.402	36.0514	0.938893	0.969531	1.02227	0.0317803	1.02227	146.402	143.212
PIGW	phosphatidylinositol glycan anchor biosynthesis class W	PIGW	PIGW	protein_coding	0.000666757	0.00373801	2.3477	1.23125	2.3477	125.818	53.5922	0.00784735	0.0782862	1.95604	0.967937	1.95604	104.829	53.5922	0.458768	0.665855	0.833174	-0.26331	-1.20023	104.829	125.818
ABHD12	abhydrolase domain containing 12, lysophospholipase	ABHD12	ABHD12	protein_coding	5.98375e-10	1.42397e-08	0.439715	-1.18536	-2.2742	3231.76	7349.67	0.00128743	0.020139	1.53155	0.614991	1.53155	11256.4	7349.67	5.25119e-21	3.85376e-19	3.48305	1.80035	3.48305	11256.4	3231.76
RGS17	regulator of G protein signaling 17	RGS17	RGS17	protein_coding	0.00801748	0.0292793	0.346593	-1.52868	-2.88523	8.23398	23.7569	0.605725	0.858978	1.2059	0.270106	1.2059	28.6483	23.7569	0.00180099	0.0106828	3.47928	1.79879	3.47928	28.6483	8.23398
WDR77	WD repeat domain 77	WDR77	WDR77	protein_coding	0.000848438	0.00456548	2.33848	1.22557	2.33848	689.421	294.815	0.0213134	0.154878	1.79876	0.847004	1.79876	530.302	294.815	0.301423	0.518998	0.7692	-0.378569	-1.30005	530.302	689.421
SLC25A33	solute carrier family 25 member 33	SLC25A33	SLC25A33	protein_coding	0.00012961	0.000928948	2.32833	1.21929	2.32833	308.08	132.318	0.0221282	0.157988	1.66226	0.733142	1.66226	219.947	132.318	0.124493	0.294416	0.713927	-0.486151	-1.4007	219.947	308.08
MEF2C	myocyte enhancer factor 2C	MEF2C	MEF2C	protein_coding	4.09909e-11	1.18069e-09	0.0786132	-3.66909	-12.7205	100.464	1277.96	0.000673385	0.012273	0.272592	-1.87519	-3.66849	348.36	1277.96	0.00128813	0.00805274	3.46751	1.7939	3.46751	348.36	100.464
RGS18	regulator of G protein signaling 18	RGS18	RGS18	protein_coding	1.15914e-08	2.16997e-07	0.0868156	-3.5259	-11.5187	54.4032	626.652	0.00451168	0.0529894	0.300536	-1.73439	-3.32739	188.331	626.652	0.0038795	0.0202404	3.46177	1.79151	3.46177	188.331	54.4032
PAQR7	progestin and adipoQ receptor family member 7	PAQR7	PAQR7	protein_coding	0.43664	0.599402	0.724889	-0.464167	-1.37952	111.898	154.366	0.0254035	0.173082	2.50651	1.32568	2.50651	386.919	154.366	0.0026252	0.0145871	3.45778	1.78984	3.45778	386.919	111.898
CRLF2	cytokine receptor like factor 2	CRLF2	CRLF2	protein_coding	0.00988596	0.0347419	2.32223	1.21551	2.32223	9601.38	4134.55	0.433125	0.753952	1.2918	0.369378	1.2918	5340.99	4134.55	0.0725126	0.201542	0.556273	-0.846134	-1.79768	5340.99	9601.38
PSD2	pleckstrin and Sec7 domain containing 2	PSD2	PSD2	protein_coding	0.208139	0.358108	0.543741	-0.879008	-1.83911	11.0151	20.258	0.172766	0.50673	1.87701	0.908433	1.87701	38.0244	20.258	0.0096032	0.0424392	3.45202	1.78744	3.45202	38.0244	11.0151
AHR	aryl hydrocarbon receptor	AHR	AHR	protein_coding	0.000309292	0.001953	0.5601	-0.836244	-1.7854	3219.7	5748.44	4.07956e-05	0.00125358	1.9316	0.949799	1.9316	11103.7	5748.44	1.29077e-14	5.67159e-13	3.44868	1.78604	3.44868	11103.7	3219.7
ENSCAFG00000046006	#N/A	ENSCAFG00000046006	---	protein_coding	5.23368e-10	1.26683e-08	0.213094	-2.23044	-4.69277	33.3824	156.656	0.188664	0.531333	0.734692	-0.444788	-1.36111	115.094	156.656	8.42937e-07	1.18674e-05	3.44774	1.78565	3.44774	115.094	33.3824
MYCL	MYCL proto-oncogene, bHLH transcription factor	MYCL	MYCL	protein_coding	4.37659e-09	8.86693e-08	0.268952	-1.89458	-3.71813	187.318	696.474	0.728521	0.910288	0.926178	-0.110639	-1.07971	645.058	696.474	3.3996e-08	6.24557e-07	3.44365	1.78394	3.44365	645.058	187.318
DCBLD2	discoidin, CUB and LCCL domain containing 2	DCBLD2	DCBLD2	protein_coding	0.0850488	0.185628	0.635669	-0.653653	-1.57315	444.275	698.91	0.00286906	0.0376365	2.18464	1.1274	2.18464	1526.87	698.91	2.61696e-06	3.32776e-05	3.43676	1.78105	3.43676	1526.87	444.275
ARNTL	aryl hydrocarbon receptor nuclear translocator like	ARNTL	ARNTL	protein_coding	0.0617802	0.146006	0.605541	-0.723704	-1.65142	271.169	447.813	0.0061047	0.0659566	2.07935	1.05614	2.07935	931.162	447.813	4.16991e-06	5.1049e-05	3.43388	1.77984	3.43388	931.162	271.169
FAM20C	FAM20C golgi associated secretory pathway kinase	FAM20C	FAM20C	protein_coding	1.1592e-07	1.75559e-06	0.406772	-1.29771	-2.45838	1265.47	3110.99	0.0482398	0.257273	1.39677	0.482091	1.39677	4345.33	3110.99	3.59586e-13	1.3445e-11	3.43378	1.7798	3.43378	4345.33	1265.47
IL6ST	interleukin 6 cytokine family signal transducer	IL6ST	IL6ST	protein_coding	0.000158897	0.00110834	2.29244	1.19688	2.29244	5176.37	2258.02	0.112681	0.406127	1.4171	0.502938	1.4171	3199.84	2258.02	0.0285064	0.0999754	0.618162	-0.693943	-1.6177	3199.84	5176.37
CPXM2	carboxypeptidase X, M14 family member 2	CPXM2	CPXM2	protein_coding	1.43176e-12	4.96332e-11	0.356115	-1.48959	-2.80808	959.62	2694.69	0.16618	0.497998	1.22228	0.289578	1.22228	3293.68	2694.69	2.73261e-17	1.52023e-15	3.43227	1.77916	3.43227	3293.68	959.62
DENND2D	DENN domain containing 2D	DENND2D	DENND2D	protein_coding	9.31566e-07	1.14757e-05	2.7269	1.44726	2.7269	8283.1	3037.55	3.57548e-11	3.91515e-09	3.87215	1.95313	3.87215	11761.8	3037.55	0.0861291	0.228653	1.41998	0.50587	1.41998	11761.8	8283.1
CHAC1	ChaC glutathione specific gamma-glutamylcyclotransferase 1	CHAC1	CHAC1	protein_coding	0.000673422	0.00377231	0.255269	-1.96991	-3.91744	11.0608	43.33	0.721147	0.90848	0.874808	-0.192962	-1.14311	37.9054	43.33	0.00234216	0.0132566	3.427	1.77695	3.427	37.9054	11.0608
ENSCAFG00000031852	#N/A	ENSCAFG00000031852	---	protein_coding	1.83234e-05	0.000163736	2.28261	1.19068	2.28261	1576.44	690.632	0.00461003	0.0538566	1.72704	0.788302	1.72704	1192.75	690.632	0.146899	0.328861	0.756609	-0.402381	-1.32169	1192.75	1576.44
CLMP	CXADR like membrane protein	CLMP	CLMP	protein_coding	0.00017906	0.00122423	0.385532	-1.37508	-2.59382	2159.57	5601.54	0.279582	0.630889	1.31629	0.396475	1.31629	7373.23	5601.54	1.38424e-06	1.85062e-05	3.41421	1.77155	3.41421	7373.23	2159.57
NR1I3	nuclear receptor subfamily 1 group I member 3	NR1I3	NR1I3	protein_coding	0.819168	0.892374	0.895559	-0.159139	-1.11662	6.87206	7.67349	0.0124747	0.10794	3.05143	1.60948	3.05143	23.4151	7.67349	0.00728092	0.034041	3.40729	1.76862	3.40729	23.4151	6.87206
BBOF1	basal body orientation factor 1	BBOF1	BBOF1	protein_coding	0.0124896	0.0418556	0.344568	-1.53714	-2.90218	8.3475	24.226	0.688182	0.894644	1.17083	0.22753	1.17083	28.3644	24.226	0.0041587	0.0214736	3.39796	1.76467	3.39796	28.3644	8.3475
TGFBI	transforming growth factor beta induced	TGFBI	TGFBI	protein_coding	0.000104464	0.000767459	0.430269	-1.21669	-2.32413	21621.1	50250.3	0.0823045	0.346036	1.45878	0.54476	1.45878	73304.1	50250.3	1.94262e-08	3.72254e-07	3.39039	1.76145	3.39039	73304.1	21621.1
SNX29	sorting nexin 29	SNX29	SNX29	protein_coding	0.00160839	0.00777541	0.619092	-0.691775	-1.61527	820.882	1325.95	9.51054e-07	4.6394e-05	2.09716	1.06844	2.09716	2780.72	1325.95	8.81654e-16	4.45574e-14	3.38748	1.76021	3.38748	2780.72	820.882
RGS12	regulator of G protein signaling 12	RGS12	RGS12	protein_coding	1.36708e-10	3.65534e-09	0.174295	-2.5204	-5.73741	263.699	1512.95	0.0513757	0.266578	0.59035	-0.760358	-1.69391	893.171	1512.95	7.57583e-06	8.82802e-05	3.38708	1.76004	3.38708	893.171	263.699
ENSCAFG00000018773	#N/A	ENSCAFG00000018773	---	protein_coding	5.34141e-05	0.000422956	0.201222	-2.31314	-4.96962	15.6946	77.9963	0.304203	0.652715	0.678138	-0.56035	-1.47463	52.8922	77.9963	0.00242184	0.0136162	3.37009	1.75279	3.37009	52.8922	15.6946
CCDC177	coiled-coil domain containing 177	CCDC177	CCDC177	protein_coding	2.48182e-05	0.000215301	0.189786	-2.39756	-5.26911	16.7075	88.0337	0.233255	0.580926	0.638502	-0.647236	-1.56616	56.2098	88.0337	0.00229786	0.0130521	3.36434	1.75032	3.36434	56.2098	16.7075
TKTL1	transketolase like 1	TKTL1	TKTL1	protein_coding	0.000784749	0.0042694	2.25573	1.1736	2.25573	167.521	74.2645	0.0601907	0.291796	1.58317	0.66282	1.58317	117.574	74.2645	0.140421	0.318881	0.701845	-0.510776	-1.42482	117.574	167.521
PFDN2	prefoldin subunit 2	PFDN2	PFDN2	protein_coding	6.98815e-05	0.000538935	2.24674	1.16783	2.24674	162.881	72.4966	0.109694	0.400007	1.39309	0.47829	1.39309	100.994	72.4966	0.0180125	0.0701633	0.620051	-0.689541	-1.61277	100.994	162.881
FRMD4B	FERM domain containing 4B	FRMD4B	FRMD4B	protein_coding	0.131654	0.257758	0.65085	-0.619602	-1.53645	142.067	218.28	0.00555078	0.0617642	2.18614	1.12838	2.18614	477.189	218.28	1.95803e-05	0.000202967	3.35889	1.74799	3.35889	477.189	142.067
IQGAP2	IQ motif containing GTPase activating protein 2	IQGAP2	IQGAP2	protein_coding	0.0570809	0.137514	0.578018	-0.790813	-1.73005	400.139	692.26	0.0219993	0.157272	1.9301	0.948674	1.9301	1336.13	692.26	2.79875e-05	0.000280017	3.33916	1.73949	3.33916	1336.13	400.139
SLC12A2	solute carrier family 12 member 2	SLC12A2	SLC12A2	protein_coding	0.000393991	0.00241595	2.23847	1.16251	2.23847	323.765	144.637	0.19639	0.540404	1.34457	0.427145	1.34457	194.475	144.637	0.0246441	0.0891741	0.600666	-0.735365	-1.66482	194.475	323.765
TMEM236	transmembrane protein 236	TMEM236	TMEM236	protein_coding	0.951344	0.971842	0.980829	-0.0279271	-1.01955	78.7262	80.265	0.000151614	0.00361906	3.26896	1.70883	3.26896	262.383	80.265	0.00012271	0.00104186	3.33285	1.73676	3.33285	262.383	78.7262
AVEN	apoptosis and caspase activation inhibitor	AVEN	AVEN	protein_coding	0.000135241	0.000962309	2.23574	1.16075	2.23574	294.984	131.94	0.00677737	0.0708389	1.77428	0.827237	1.77428	234.1	131.94	0.2687	0.484419	0.793601	-0.333514	-1.26008	234.1	294.984
ATP6V0D2	ATPase H+ transporting V0 subunit d2	ATP6V0D2	ATP6V0D2	protein_coding	0.0107249	0.0370486	0.42523	-1.23369	-2.35167	34.5818	81.3249	0.289272	0.640219	1.41143	0.497158	1.41143	114.784	81.3249	0.000332211	0.00250192	3.31922	1.73084	3.31922	114.784	34.5818
MID2	midline 2	MID2	MID2	protein_coding	0.0286941	0.0802864	2.68708	1.42604	2.68708	40.0464	14.9033	0.00317615	0.0403681	3.76839	1.91395	3.76839	56.1615	14.9033	0.438085	0.647692	1.40241	0.487908	1.40241	56.1615	40.0464
KDM7A	lysine demethylase 7A	KDM7A	KDM7A	protein_coding	1.55372e-09	3.42987e-08	0.401762	-1.31559	-2.48903	1187.49	2955.69	0.0565014	0.281213	1.3321	0.413707	1.3321	3937.29	2955.69	2.03965e-15	9.94382e-14	3.31565	1.72929	3.31565	3937.29	1187.49
RGS2	regulator of G protein signaling 2	RGS2	RGS2	protein_coding	3.28911e-21	3.46411e-19	0.146982	-2.76629	-6.80355	764.492	5201.27	0.000363095	0.00733473	0.486524	-1.03942	-2.0554	2530.54	5201.27	3.72841e-09	8.15227e-08	3.31009	1.72687	3.31009	2530.54	764.492
ENSCAFG00000025607	#N/A	ENSCAFG00000025607	---	protein_coding	0.0126497	0.0423137	2.21868	1.1497	2.21868	33.1217	14.9286	0.631443	0.870431	1.17459	0.232153	1.17459	17.5349	14.9286	0.0467861	0.146109	0.529409	-0.917546	-1.8889	17.5349	33.1217
AUNIP	aurora kinase A and ninein interacting protein	AUNIP	AUNIP	protein_coding	0.012293	0.0413272	0.508104	-0.976803	-1.9681	28.2271	55.5537	0.0425562	0.238678	1.67782	0.746585	1.67782	93.2089	55.5537	7.99083e-06	9.21819e-05	3.30211	1.72339	3.30211	93.2089	28.2271
ENSCAFG00000043115	#N/A	ENSCAFG00000043115	---	protein_coding	0.00396774	0.0164655	2.21797	1.14924	2.21797	55.7905	25.1539	0.698125	0.899819	1.11842	0.161462	1.11842	28.1326	25.1539	0.0137391	0.0564162	0.504255	-0.987776	-1.98313	28.1326	55.7905
EEF1AKMT4	EEF1A lysine methyltransferase 4	EEF1AKMT4	EEF1AKMT4	protein_coding	0.000677805	0.00379039	2.21775	1.1491	2.21775	196.827	88.7506	0.169381	0.502618	1.385	0.469885	1.385	122.919	88.7506	0.0436521	0.1387	0.624505	-0.679215	-1.60127	122.919	196.827
IDH3A	isocitrate dehydrogenase (NAD(+)) 3 catalytic subunit alpha	IDH3A	IDH3A	protein_coding	1.16652e-06	1.41552e-05	2.21455	1.14702	2.21455	2936.29	1325.91	0.00912937	0.0862451	1.5325	0.615883	1.5325	2031.95	1325.91	0.0242442	0.0879792	0.692011	-0.531133	-1.44506	2031.95	2936.29
ARAP2	ArfGAP with RhoGAP domain, ankyrin repeat and PH domain 2	ARAP2	ARAP2	protein_coding	0.00265857	0.0118247	0.566058	-0.820978	-1.7666	239.128	422.445	0.000855393	0.0146972	1.86465	0.898905	1.86465	787.712	422.445	2.67048e-10	6.9127e-09	3.2941	1.71988	3.2941	787.712	239.128
ENPP3	ectonucleotide pyrophosphatase/phosphodiesterase 3	ENPP3	ENPP3	protein_coding	1.3482e-06	1.61048e-05	0.153746	-2.70138	-6.50424	15.8386	103.018	0.0644312	0.302264	0.505836	-0.983258	-1.97693	52.1103	103.018	0.00241956	0.0136145	3.29008	1.71812	3.29008	52.1103	15.8386
DLA-DOA	#N/A	DLA-DOA	DLA-DOA	protein_coding	7.05292e-05	0.000543019	3.76264	1.91174	3.76264	140.787	37.4172	7.38272e-05	0.00204295	3.75343	1.90821	3.75343	140.443	37.4172	0.993986	0.997846	0.997553	-0.00353392	-1.00245	140.443	140.787
NFIA	nuclear factor I A	NFIA	NFIA	protein_coding	5.7802e-06	5.88556e-05	0.192093	-2.38013	-5.20582	22.5116	117.191	0.188113	0.530756	0.631068	-0.664133	-1.58462	73.9556	117.191	0.00119204	0.00755755	3.28523	1.71599	3.28523	73.9556	22.5116
PDK1	pyruvate dehydrogenase kinase 1	PDK1	PDK1	protein_coding	1.29713e-06	1.55352e-05	0.416209	-1.26462	-2.40264	641.027	1540.15	0.0831758	0.348078	1.36623	0.450204	1.36623	2104.21	1540.15	5.18949e-11	1.48547e-09	3.28256	1.71482	3.28256	2104.21	641.027
CAT	catalase	CAT	CAT	protein_coding	1.49261e-13	6.03917e-12	0.3062	-1.70745	-3.26584	3341.63	10913.2	0.988903	0.996541	1.00223	0.00320984	1.00223	10937.5	10913.2	1.35258e-13	5.27161e-12	3.27311	1.71066	3.27311	10937.5	3341.63
CBFA2T3	CBFA2/RUNX1 partner transcriptional co-repressor 3	CBFA2T3	CBFA2T3	protein_coding	0.0919663	0.197334	1.48794	0.573319	1.48794	222.421	149.482	1.39076e-11	1.66855e-09	4.85247	2.27872	4.85247	725.359	149.482	3.71858e-07	5.5949e-06	3.26119	1.7054	3.26119	725.359	222.421
VWA1	von Willebrand factor A domain containing 1	VWA1	VWA1	protein_coding	0.000342457	0.00213989	0.243042	-2.04072	-4.11452	21.0805	86.7361	0.524494	0.813906	0.784522	-0.350115	-1.27466	68.0464	86.7361	0.00318629	0.0171522	3.22793	1.69061	3.22793	68.0464	21.0805
KYAT1	kynurenine aminotransferase 1	KYAT1	KYAT1	protein_coding	3.58615e-06	3.86548e-05	0.391369	-1.3534	-2.55513	83.9575	214.522	0.238077	0.584928	1.25977	0.333155	1.25977	270.248	214.522	7.48888e-09	1.54909e-07	3.21887	1.68655	3.21887	270.248	83.9575
RAB37	RAB37, member RAS oncogene family	RAB37	RAB37	protein_coding	2.22856e-08	3.91188e-07	0.13855	-2.85152	-7.21759	15.2917	110.369	0.0149894	0.122083	0.445892	-1.16523	-2.24269	49.2128	110.369	0.00116162	0.00738906	3.21827	1.68629	3.21827	49.2128	15.2917
FOSL2	FOS like 2, AP-1 transcription factor subunit	FOSL2	FOSL2	protein_coding	1.17902e-07	1.78366e-06	0.38738	-1.36818	-2.58144	2458.65	6346.87	0.221995	0.568776	1.244	0.314985	1.244	7895.5	6346.87	7.21677e-11	2.00342e-09	3.21131	1.68316	3.21131	7895.5	2458.65
CLEC7A	C-type lectin domain containing 7A	CLEC7A	CLEC7A	protein_coding	4.39063e-16	2.47255e-14	0.154474	-2.69456	-6.47356	177.759	1150.73	0.00199863	0.0287472	0.495793	-1.01219	-2.01697	570.526	1150.73	4.26112e-07	6.32838e-06	3.20955	1.68237	3.20955	570.526	177.759
SORT1	sortilin 1	SORT1	SORT1	protein_coding	3.56961e-07	4.89317e-06	0.126403	-2.9839	-7.91123	319.33	2526.29	0.0253814	0.173082	0.404008	-1.30754	-2.4752	1020.64	2526.29	0.00426364	0.0219171	3.1962	1.67636	3.1962	1020.64	319.33
ALDH18A1	aldehyde dehydrogenase 18 family member A1	ALDH18A1	ALDH18A1	protein_coding	8.01342e-05	0.000608817	2.18507	1.12768	2.18507	1747.24	799.628	0.102384	0.387225	1.38302	0.467826	1.38302	1105.9	799.628	0.020924	0.0786176	0.632942	-0.659855	-1.57992	1105.9	1747.24
PDCD2L	programmed cell death 2 like	PDCD2L	PDCD2L	protein_coding	0.00220053	0.0101236	2.18388	1.1269	2.18388	208.483	95.4642	0.0349743	0.213042	1.71676	0.779692	1.71676	163.889	95.4642	0.34189	0.561621	0.786106	-0.347204	-1.27209	163.889	208.483
C30H15orf48	#N/A	C30H15orf48	C30H15orf48	protein_coding	0.11433	0.231904	0.561492	-0.832663	-1.78097	797.871	1420.98	0.109858	0.400133	1.79281	0.842225	1.79281	2547.56	1420.98	0.00148824	0.00912184	3.19295	1.67489	3.19295	2547.56	797.871
CASP3	caspase 3	CASP3	CASP3	protein_coding	0.231554	0.3857	0.774068	-0.369468	-1.29188	246.244	318.116	1.99947e-05	0.000677807	2.46929	1.3041	2.46929	785.522	318.116	5.09142e-08	9.09926e-07	3.19002	1.67357	3.19002	785.522	246.244
CELSR2	cadherin EGF LAG seven-pass G-type receptor 2	CELSR2	CELSR2	protein_coding	0.00975292	0.0343882	0.322419	-1.63299	-3.10156	16.6806	51.7359	0.948662	0.98539	1.02757	0.0392411	1.02757	53.1624	51.7359	0.00829263	0.0378602	3.18708	1.67223	3.18708	53.1624	16.6806
RRP7	#N/A	RRP7	RRP7	protein_coding	4.10193e-05	0.000335871	2.17734	1.12257	2.17734	327.114	150.235	0.0666205	0.308548	1.42076	0.506664	1.42076	213.448	150.235	0.0237865	0.086683	0.652521	-0.615905	-1.53252	213.448	327.114
MARS2	methionyl-tRNA synthetase 2, mitochondrial	MARS2	MARS2	protein_coding	0.000793529	0.00430697	2.17648	1.122	2.17648	148.325	68.1491	0.0543645	0.275636	1.56927	0.650092	1.56927	106.944	68.1491	0.154055	0.338402	0.721012	-0.471904	-1.38694	106.944	148.325
PDLIM4	PDZ and LIM domain 4	PDLIM4	PDLIM4	protein_coding	5.80921e-05	0.000457737	0.35073	-1.51157	-2.85119	164.559	469.19	0.674324	0.888124	1.1145	0.156403	1.1145	522.914	469.19	9.2165e-06	0.00010423	3.17767	1.66797	3.17767	522.914	164.559
CRIP2	cysteine rich protein 2	CRIP2	CRIP2	protein_coding	0.000763037	0.00416771	0.285677	-1.80754	-3.50046	11.8707	41.5529	0.772005	0.926769	0.904547	-0.144733	-1.10553	37.5865	41.5529	0.00213651	0.0122925	3.16633	1.66281	3.16633	37.5865	11.8707
ELL3	elongation factor for RNA polymerase II 3	ELL3	ELL3	protein_coding	0.0135595	0.044596	2.17373	1.12017	2.17373	55.9475	25.738	0.107877	0.396582	1.66835	0.738425	1.66835	42.9401	25.738	0.391973	0.60929	0.767508	-0.381747	-1.30292	42.9401	55.9475
SLC25A23	solute carrier family 25 member 23	SLC25A23	SLC25A23	protein_coding	0.103158	0.214962	0.541005	-0.886286	-1.84841	159.443	294.716	0.152239	0.47489	1.71089	0.774746	1.71089	504.226	294.716	0.00223089	0.0127188	3.16243	1.66103	3.16243	504.226	159.443
ENSCAFG00000019141	#N/A	ENSCAFG00000019141	---	protein_coding	2.90139e-05	0.000248174	0.261659	-1.93424	-3.82177	598.809	2288.51	0.553056	0.831026	0.827074	-0.273912	-1.20908	1892.77	2288.51	0.000333256	0.00250705	3.16089	1.66033	3.16089	1892.77	598.809
GK5	glycerol kinase 5	GK5	GK5	protein_coding	0.00209515	0.00972637	0.665278	-0.587971	-1.50313	1657.42	2491.33	1.96934e-08	1.36538e-06	2.09805	1.06905	2.09805	5226.94	2491.33	3.90717e-18	2.32359e-16	3.15365	1.65702	3.15365	5226.94	1657.42
EDNRB	endothelin receptor type B	EDNRB	EDNRB	protein_coding	7.70688e-09	1.48716e-07	0.0982046	-3.34807	-10.1828	15.2714	155.506	0.00222819	0.0311473	0.309625	-1.69141	-3.22971	48.1486	155.506	0.00496537	0.0247766	3.15286	1.65666	3.15286	48.1486	15.2714
PTGFRN	prostaglandin F2 receptor inhibitor	PTGFRN	PTGFRN	protein_coding	8.97714e-22	1.01523e-19	0.304954	-1.71333	-3.27918	887.938	2911.71	0.743555	0.917688	0.960616	-0.0579688	-1.041	2797.03	2911.71	2.12319e-20	1.50224e-18	3.15003	1.65537	3.15003	2797.03	887.938
ENPP2	ectonucleotide pyrophosphatase/phosphodiesterase 2	ENPP2	ENPP2	protein_coding	7.48085e-09	1.45166e-07	0.138232	-2.85483	-7.23419	3735.7	27024.8	0.0147189	0.120807	0.43394	-1.20443	-2.30447	11727.1	27024.8	0.00083411	0.00555348	3.1392	1.6504	3.1392	11727.1	3735.7
SAT1	spermidine/spermine N1-acetyltransferase 1	SAT1	SAT1	protein_coding	0.00457164	0.0185188	0.449782	-1.1527	-2.2233	4814.87	10704.9	0.233429	0.580926	1.39882	0.484212	1.39882	14974.2	10704.9	5.64952e-05	0.000519218	3.11	1.63692	3.11	14974.2	4814.87
PIK3IP1	phosphoinositide-3-kinase interacting protein 1	PIK3IP1	PIK3IP1	protein_coding	0.000126316	0.000907224	0.208096	-2.26468	-4.80547	154.429	742.104	0.285347	0.636771	0.646874	-0.628444	-1.5459	480.048	742.104	0.00565933	0.0276689	3.10853	1.63623	3.10853	480.048	154.429
ENSCAFG00000005828	#N/A	ENSCAFG00000005828	---	protein_coding	0.0744739	0.168362	0.551273	-0.859162	-1.81398	196.517	356.478	0.105662	0.392625	1.7117	0.775429	1.7117	610.184	356.478	0.000680361	0.00467477	3.10499	1.63459	3.10499	610.184	196.517
DIP2C	disco interacting protein 2 homolog C	DIP2C	DIP2C	protein_coding	6.81028e-06	6.82363e-05	6.02908	2.59194	6.02908	34.3357	5.69502	0.00209811	0.0297509	3.52327	1.81692	3.52327	20.0651	5.69502	0.127178	0.299024	0.584381	-0.77502	-1.71121	20.0651	34.3357
ENSCAFG00000029263	#N/A	ENSCAFG00000029263	---	protein_coding	0.230466	0.384384	0.64253	-0.638163	-1.55635	25.8984	40.3069	0.0535542	0.273156	1.99282	0.994812	1.99282	80.3244	40.3069	0.00191562	0.0112133	3.10152	1.63298	3.10152	80.3244	25.8984
WASF1	WASP family member 1	WASF1	WASF1	protein_coding	0.0098304	0.0345907	0.360163	-1.47328	-2.77652	6.40079	17.7719	0.754318	0.922007	1.11562	0.157848	1.11562	19.8267	17.7719	0.00439572	0.0224455	3.09754	1.63112	3.09754	19.8267	6.40079
ENSCAFG00000029953	#N/A	ENSCAFG00000029953	---	protein_coding	3.77625e-05	0.000314619	0.309351	-1.69268	-3.23257	15.9827	51.6651	0.860773	0.959916	0.955496	-0.0656789	-1.04658	49.3657	51.6651	8.64156e-05	0.000757963	3.08871	1.627	3.08871	49.3657	15.9827
RAB3IL1	RAB3A interacting protein like 1	RAB3IL1	RAB3IL1	protein_coding	0.00458687	0.0185696	0.427525	-1.22592	-2.33905	2337.22	5466.87	0.35605	0.69652	1.31852	0.398918	1.31852	7208.17	5466.87	0.000171848	0.00140787	3.08407	1.62484	3.08407	7208.17	2337.22
BTBD19	BTB domain containing 19	BTBD19	BTBD19	protein_coding	1.61396e-08	2.92997e-07	0.435987	-1.19764	-2.29365	447.395	1026.17	0.0440923	0.243824	1.33972	0.421933	1.33972	1374.78	1026.17	2.10306e-14	9.03922e-13	3.07285	1.61958	3.07285	1374.78	447.395
POLN	DNA polymerase nu	POLN	POLN	protein_coding	0.0785066	0.17524	0.506452	-0.981502	-1.97452	8.62805	17.0362	0.210372	0.555609	1.55504	0.636952	1.55504	26.4921	17.0362	0.00325425	0.0174432	3.07046	1.61845	3.07046	26.4921	8.62805
PRDM1	PR/SET domain 1	PRDM1	PRDM1	protein_coding	0.00749024	0.0277306	0.601371	-0.733672	-1.66287	3288.22	5467.88	0.00126288	0.0198225	1.8452	0.883774	1.8452	10089.3	5467.88	3.70734e-09	8.11907e-08	3.06831	1.61745	3.06831	10089.3	3288.22
PID1	phosphotyrosine interaction domain containing 1	PID1	PID1	protein_coding	1.16098e-06	1.41128e-05	0.217169	-2.20311	-4.60472	2205.79	10157	0.194419	0.538742	0.665431	-0.587638	-1.50278	6758.8	10157	0.000363924	0.00269805	3.06412	1.61547	3.06412	6758.8	2205.79
MARCHF9	membrane associated ring-CH-type finger 9	MARCHF9	MARCHF9	protein_coding	0.00366333	0.015418	0.565013	-0.823643	-1.76987	130.37	230.739	0.00429105	0.0510816	1.73119	0.791765	1.73119	399.453	230.739	1.0102e-08	2.02968e-07	3.06398	1.61541	3.06398	399.453	130.37
PAQR4	progestin and adipoQ receptor family member 4	PAQR4	PAQR4	protein_coding	0.0186567	0.0572522	0.67105	-0.575507	-1.4902	148.259	220.936	1.33369e-05	0.000482899	2.05308	1.03779	2.05308	453.599	220.936	2.73134e-11	8.17447e-10	3.0595	1.6133	3.0595	453.599	148.259
TFRC	transferrin receptor	TFRC	TFRC	protein_coding	1.38763e-11	4.1893e-10	0.183623	-2.44518	-5.44594	8360.73	45532	0.0201774	0.14951	0.5586	-0.840114	-1.79019	25434.2	45532	9.12674e-06	0.000103469	3.0421	1.60507	3.0421	25434.2	8360.73
LGALS3	galectin 3	LGALS3	LGALS3	protein_coding	0.0250297	0.0719598	0.602203	-0.731677	-1.66057	8881.94	14749.1	0.00784599	0.0782862	1.82494	0.86785	1.82494	26916.2	14749.1	9.6299e-07	1.338e-05	3.03044	1.59953	3.03044	26916.2	8881.94
EEF2K	eukaryotic elongation factor 2 kinase	EEF2K	EEF2K	protein_coding	5.80905e-10	1.39145e-08	0.348924	-1.51901	-2.86595	250.947	719.203	0.739091	0.915947	1.05733	0.0804191	1.05733	760.431	719.203	7.16834e-11	1.99398e-09	3.03024	1.59943	3.03024	760.431	250.947
BHLHE40	basic helix-loop-helix family member e40	BHLHE40	BHLHE40	protein_coding	0.851342	0.912792	0.975231	-0.0361844	-1.0254	5005.34	5132.47	5.53277e-16	1.21168e-13	2.95295	1.56216	2.95295	15155.9	5132.47	1.1827e-16	6.27602e-15	3.02795	1.59834	3.02795	15155.9	5005.34
SEPTIN11	septin 11	SEPTIN11	SEPTIN11	protein_coding	0.0141996	0.0462057	0.422205	-1.24398	-2.36852	53.0425	125.632	0.482677	0.786059	1.27473	0.350192	1.27473	160.147	125.632	0.00166484	0.00999558	3.01922	1.59418	3.01922	160.147	53.0425
LCMT2	leucine carboxyl methyltransferase 2	LCMT2	LCMT2	protein_coding	0.000680731	0.00380245	2.09415	1.06636	2.09415	100.107	47.803	0.07508	0.328537	1.4834	0.568909	1.4834	70.911	47.803	0.10822	0.267472	0.708356	-0.497454	-1.41172	70.911	100.107
ENSCAFG00000001582	#N/A	ENSCAFG00000001582	---	protein_coding	0.00140953	0.00697535	0.277609	-1.84887	-3.60219	12.7715	46.0052	0.640942	0.874163	0.8377	-0.255495	-1.19375	38.5386	46.0052	0.00637657	0.0305266	3.01755	1.59338	3.01755	38.5386	12.7715
NFKB1	nuclear factor kappa B subunit 1	NFKB1	NFKB1	protein_coding	2.21458e-05	0.000194244	2.0908	1.06405	2.0908	10873.8	5200.78	0.0170177	0.133702	1.51435	0.598701	1.51435	7875.82	5200.78	0.0635013	0.183906	0.724295	-0.465351	-1.38065	7875.82	10873.8
CD300H	CD300H molecule (gene/pseudogene)	CD300H	CD300H	protein_coding	0.0196142	0.0594502	0.591719	-0.757015	-1.68999	2445.44	4132.77	0.0107266	0.097301	1.77394	0.826958	1.77394	7331.29	4132.77	1.04043e-06	1.43548e-05	2.99794	1.58397	2.99794	7331.29	2445.44
SEMA7A	semaphorin 7A (John Milton Hagen blood group)	SEMA7A	SEMA7A	protein_coding	0.00210037	0.00974592	0.610526	-0.711875	-1.63793	7507.06	12296	0.000169236	0.00396046	1.82769	0.870023	1.82769	22473.4	12296	8.19504e-12	2.59924e-10	2.99363	1.5819	2.99363	22473.4	7507.06
ARHGEF40	Rho guanine nucleotide exchange factor 40	ARHGEF40	ARHGEF40	protein_coding	2.06567e-06	2.35344e-05	0.405089	-1.30369	-2.46859	438.813	1083.25	0.322748	0.667977	1.20557	0.269716	1.20557	1305.94	1083.25	1.01065e-08	2.02968e-07	2.97606	1.57341	2.97606	1305.94	438.813
PLEKHG4	pleckstrin homology and RhoGEF domain containing G4	PLEKHG4	PLEKHG4	protein_coding	0.00326502	0.0140429	0.301084	-1.73176	-3.32133	7.34035	24.3798	0.764259	0.926152	0.894818	-0.160334	-1.11755	21.8154	24.3798	0.00836782	0.0381026	2.97199	1.57143	2.97199	21.8154	7.34035
UTP4	UTP4 small subunit processome component	UTP4	UTP4	protein_coding	0.00273268	0.0121114	2.08803	1.06214	2.08803	677.783	324.603	0.0444921	0.245151	1.63967	0.713406	1.63967	532.243	324.603	0.324196	0.542107	0.78527	-0.348739	-1.27345	532.243	677.783
PIK3CB	phosphatidylinositol-4,5-bisphosphate 3-kinase catalytic subunit beta	PIK3CB	PIK3CB	protein_coding	0.00781652	0.0287585	0.650079	-0.621313	-1.53827	2564.61	3945.07	4.79972e-05	0.00140897	1.92929	0.948071	1.92929	7611.19	3945.07	1.79529e-11	5.49217e-10	2.96778	1.56938	2.96778	7611.19	2564.61
ENSCAFG00000002078	#N/A	ENSCAFG00000002078	---	protein_coding	0.0990829	0.208491	0.55671	-0.845003	-1.79627	2251.15	4043.68	0.157946	0.483602	1.65078	0.72315	1.65078	6675.23	4043.68	0.00220605	0.0126085	2.96525	1.56815	2.96525	6675.23	2251.15
ENSCAFG00000015709	#N/A	ENSCAFG00000015709	---	protein_coding	0.0119256	0.040308	2.08116	1.05739	2.08116	32.8111	15.7658	0.10792	0.396635	1.61491	0.691453	1.61491	25.4603	15.7658	0.369382	0.587274	0.775966	-0.365934	-1.28872	25.4603	32.8111
CAPN3	calpain 3	CAPN3	CAPN3	protein_coding	2.22671e-07	3.17047e-06	0.274114	-1.86715	-3.64812	29.8011	108.718	0.373479	0.71079	0.811226	-0.301825	-1.2327	88.1948	108.718	1.73129e-05	0.000182899	2.95945	1.56533	2.95945	88.1948	29.8011
SLC2A3	solute carrier family 2 member 3	SLC2A3	SLC2A3	protein_coding	0.384617	0.549219	1.11092	0.151752	1.11092	5668.54	5102.57	7.75305e-23	3.56563e-20	3.28361	1.71528	3.28361	16754.9	5102.57	3.02851e-19	1.97096e-17	2.95577	1.56353	2.95577	16754.9	5668.54
DUSP6	dual specificity phosphatase 6	DUSP6	DUSP6	protein_coding	3.31002e-14	1.46971e-12	0.348642	-1.52018	-2.86827	3832.38	10992.3	0.830297	0.950144	1.03017	0.0428823	1.03017	11323.9	10992.3	6.26104e-15	2.84156e-13	2.95481	1.56306	2.95481	11323.9	3832.38
SLC38A1	solute carrier family 38 member 1	SLC38A1	SLC38A1	protein_coding	0.000126244	0.000907183	0.514955	-0.957483	-1.94192	613.908	1192.16	0.0148433	0.121467	1.52086	0.604889	1.52086	1813.11	1192.16	3.82879e-10	9.63974e-09	2.95339	1.56237	2.95339	1813.11	613.908
VSIR	V-set immunoregulatory receptor	VSIR	VSIR	protein_coding	4.08869e-13	1.54977e-11	0.161255	-2.63259	-6.20137	1074.33	6662.32	0.00298363	0.0389084	0.474327	-1.07605	-2.10825	3160.12	6662.32	1.81785e-05	0.000190584	2.94148	1.55654	2.94148	3160.12	1074.33
TES	testin LIM domain protein	TES	TES	protein_coding	0.03447	0.0925415	0.623463	-0.681623	-1.60394	444.645	713.185	0.0063976	0.0680552	1.83365	0.87472	1.83365	1307.73	713.185	1.33137e-06	1.79208e-05	2.94107	1.55634	2.94107	1307.73	444.645
ITGB3	integrin subunit beta 3	ITGB3	ITGB3	protein_coding	0.0593262	0.141466	0.688385	-0.538713	-1.45268	243.619	353.899	0.000316932	0.00657551	2.02398	1.01719	2.02398	716.284	353.899	4.48436e-08	8.07712e-07	2.94019	1.55591	2.94019	716.284	243.619
ENSCAFG00000043350	#N/A	ENSCAFG00000043350	---	protein_coding	0.00184136	0.00867961	2.07033	1.04986	2.07033	259.829	125.501	0.00542315	0.0608188	1.9174	0.939152	1.9174	240.636	125.501	0.740468	0.864318	0.926132	-0.11071	-1.07976	240.636	259.829
TM4SF5	transmembrane 4 L six family member 5	TM4SF5	TM4SF5	protein_coding	0.00820241	0.0298519	0.364664	-1.45536	-2.74225	10.6344	29.1621	0.847409	0.954177	1.07058	0.0983866	1.07058	31.2203	29.1621	0.00494028	0.0246871	2.93578	1.55375	2.93578	31.2203	10.6344
ZNF575	zinc finger protein 575	ZNF575	ZNF575	protein_coding	0.0888178	0.192042	0.636965	-0.650714	-1.56994	29.0408	45.5925	0.012672	0.109204	1.86893	0.902211	1.86893	85.2091	45.5925	3.59039e-05	0.00034787	2.93411	1.55292	2.93411	85.2091	29.0408
CD320	CD320 molecule	CD320	CD320	protein_coding	0.00347834	0.0147709	2.06735	1.04779	2.06735	273.431	132.262	0.00471281	0.054779	2.02014	1.01446	2.02014	267.187	132.262	0.925376	0.963724	0.977162	-0.0333305	-1.02337	267.187	273.431
NOP2	NOP2 nucleolar protein	NOP2	NOP2	protein_coding	0.000238012	0.00155633	2.06684	1.04743	2.06684	853.236	412.822	0.144752	0.465533	1.33521	0.417065	1.33521	551.204	412.822	0.0268446	0.0955312	0.646015	-0.63036	-1.54795	551.204	853.236
VAV2	vav guanine nucleotide exchange factor 2	VAV2	VAV2	protein_coding	0.0524729	0.128889	0.490658	-1.02721	-2.03808	16.5475	33.7252	0.297179	0.645916	1.43916	0.525222	1.43916	48.5358	33.7252	0.00320304	0.0172223	2.93311	1.55243	2.93311	48.5358	16.5475
ZSWIM4	zinc finger SWIM-type containing 4	ZSWIM4	ZSWIM4	protein_coding	0.032401	0.0883995	0.677586	-0.561523	-1.47583	2204.76	3253.84	0.000156733	0.00372836	1.98719	0.990728	1.98719	6465.99	3253.84	3.27843e-09	7.28381e-08	2.93275	1.55225	2.93275	6465.99	2204.76
MGLL	monoglyceride lipase	MGLL	MGLL	protein_coding	0.000960468	0.005054	0.536115	-0.899386	-1.86527	327.666	611.186	0.0157918	0.126748	1.57073	0.651432	1.57073	960.007	611.186	1.18028e-08	2.34645e-07	2.92983	1.55082	2.92983	960.007	327.666
ENSCAFG00000030858	#N/A	ENSCAFG00000030858	---	protein_coding	0.00110018	0.00564493	2.06112	1.04343	2.06112	49.4938	24.013	0.294777	0.644665	1.27579	0.351395	1.27579	30.6357	24.013	0.0288639	0.100998	0.61898	-0.692034	-1.61556	30.6357	49.4938
PHYHD1	phytanoyl-CoA dioxygenase domain containing 1	PHYHD1	PHYHD1	protein_coding	0.00430352	0.0176503	0.572986	-0.803429	-1.74524	61.6468	107.589	0.00550018	0.0613964	1.67601	0.745035	1.67601	180.32	107.589	2.66896e-08	5.01002e-07	2.92506	1.54846	2.92506	180.32	61.6468
TGFBR1	transforming growth factor beta receptor 1	TGFBR1	TGFBR1	protein_coding	3.31289e-14	1.46971e-12	0.339353	-1.55914	-2.94679	1319.48	3888.23	0.958011	0.988164	0.992558	-0.0107772	-1.0075	3859.29	3888.23	5.07308e-14	2.07907e-12	2.92486	1.54837	2.92486	3859.29	1319.48
FOXP3	forkhead box P3	FOXP3	FOXP3	protein_coding	0.374092	0.539551	0.689878	-0.535588	-1.44953	28.407	41.1769	0.086123	0.354275	2.01634	1.01174	2.01634	83.0265	41.1769	0.00959191	0.0424301	2.92274	1.54732	2.92274	83.0265	28.407
TEFM	transcription elongation factor, mitochondrial	TEFM	TEFM	protein_coding	1.51486e-06	1.78603e-05	2.04836	1.03447	2.04836	202.136	98.6818	0.0116508	0.103546	1.46681	0.552684	1.46681	144.748	98.6818	0.0232224	0.0851448	0.716089	-0.481788	-1.39647	144.748	202.136
BMP2K	BMP2 inducible kinase	BMP2K	BMP2K	protein_coding	0.00152577	0.00744377	0.454287	-1.13832	-2.20125	2042.05	4495.08	0.256212	0.606444	1.32629	0.407392	1.32629	5961.76	4495.08	1.67529e-05	0.000177937	2.91949	1.54572	2.91949	5961.76	2042.05
ATF7IP2	activating transcription factor 7 interacting protein 2	ATF7IP2	ATF7IP2	protein_coding	1.13173e-08	2.12153e-07	0.423658	-1.23903	-2.3604	541.129	1277.28	0.160235	0.487346	1.2329	0.302061	1.2329	1574.76	1277.28	1.2263e-12	4.2404e-11	2.91014	1.54109	2.91014	1574.76	541.129
ENSCAFG00000014268	#N/A	ENSCAFG00000014268	---	protein_coding	0.0129106	0.0428429	2.04713	1.0336	2.04713	46.7187	22.8215	0.270859	0.621907	1.38442	0.469286	1.38442	31.5947	22.8215	0.169729	0.359993	0.676275	-0.564319	-1.47869	31.5947	46.7187
TNS1	tensin 1	TNS1	TNS1	protein_coding	4.0589e-06	4.30112e-05	0.291935	-1.77628	-3.42542	1520.71	5209.09	0.532498	0.818047	0.846541	-0.240349	-1.18128	4409.7	5209.09	6.7719e-05	0.000608677	2.89976	1.53593	2.89976	4409.7	1520.71
OSBPL3	oxysterol binding protein like 3	OSBPL3	OSBPL3	protein_coding	1.16153e-08	2.1715e-07	0.466937	-1.0987	-2.14162	150.809	322.975	0.0180688	0.138526	1.35378	0.436988	1.35378	437.236	322.975	1.25865e-15	6.17994e-14	2.89927	1.53569	2.89927	437.236	150.809
TFDP2	transcription factor Dp-2	TFDP2	TFDP2	protein_coding	7.58375e-09	1.46956e-07	0.186576	-2.42216	-5.35975	16.8235	90.1698	0.021613	0.156123	0.540141	-0.888593	-1.85137	48.7044	90.1698	0.000352917	0.00262916	2.89502	1.53357	2.89502	48.7044	16.8235
CD36	CD36 molecule	CD36	CD36	protein_coding	8.19061e-11	2.27834e-09	0.254437	-1.97462	-3.93025	3783.65	14870.7	0.145252	0.466381	0.735936	-0.442347	-1.35881	10943.9	14870.7	4.62889e-07	6.82315e-06	2.89241	1.53227	2.89241	10943.9	3783.65
LEKR1	leucine, glutamate and lysine rich 1	LEKR1	LEKR1	protein_coding	0.000208911	0.00139514	0.315597	-1.66384	-3.16859	13.1528	41.676	0.746417	0.918135	0.912227	-0.132535	-1.09622	38.018	41.676	0.000740746	0.00499759	2.89048	1.53131	2.89048	38.018	13.1528
ATP1B1	ATPase Na+/K+ transporting subunit beta 1	ATP1B1	ATP1B1	protein_coding	3.06552e-06	3.3728e-05	2.0434	1.03097	2.0434	1507.93	737.951	0.0256879	0.174466	1.40854	0.4942	1.40854	1039.43	737.951	0.0149815	0.0606449	0.689311	-0.536773	-1.45072	1039.43	1507.93
ETHE1	ETHE1 persulfide dioxygenase	ETHE1	ETHE1	protein_coding	0.244747	0.401376	0.861192	-0.215593	-1.16118	460.179	534.351	6.70801e-13	9.54128e-11	2.48507	1.31328	2.48507	1327.9	534.351	8.63683e-17	4.63667e-15	2.88561	1.52888	2.88561	1327.9	460.179
ENSCAFG00000013713	#N/A	ENSCAFG00000013713	---	protein_coding	0.77935	0.867321	1.03835	0.0542896	1.03835	1401.7	1349.93	2.60839e-16	5.998e-14	2.99114	1.5807	2.99114	4037.83	1349.93	2.66669e-15	1.28196e-13	2.88068	1.52641	2.88068	4037.83	1401.7
PHB	prohibitin	PHB	PHB	protein_coding	4.98421e-05	0.000398882	2.03779	1.027	2.03779	2129.08	1044.8	0.0490909	0.259803	1.41315	0.498915	1.41315	1476.46	1044.8	0.036856	0.121972	0.693473	-0.528089	-1.44202	1476.46	2129.08
CCT8	chaperonin containing TCP1 subunit 8	CCT8	CCT8	protein_coding	0.000147671	0.00103738	2.03607	1.02579	2.03607	4879.13	2396.35	0.102515	0.387454	1.35811	0.441603	1.35811	3254.51	2396.35	0.0306389	0.105655	0.667026	-0.584185	-1.49919	3254.51	4879.13
DCHS1	dachsous cadherin-related 1	DCHS1	DCHS1	protein_coding	1.02424e-07	1.57366e-06	0.322373	-1.6332	-3.102	210.026	651.501	0.717407	0.90758	0.926707	-0.109814	-1.07909	603.751	651.501	7.15756e-07	1.02123e-05	2.87465	1.52338	2.87465	603.751	210.026
KLF7	Kruppel like factor 7	KLF7	KLF7	protein_coding	0.106455	0.219958	0.510994	-0.968623	-1.95697	32.2126	63.0391	0.347322	0.689397	1.46728	0.553146	1.46728	92.4962	63.0391	0.0109992	0.0473202	2.87143	1.52177	2.87143	92.4962	32.2126
FBXO40	F-box protein 40	FBXO40	FBXO40	protein_coding	0.000372	0.00229744	0.401183	-1.31767	-2.49263	31.2828	77.9763	0.568882	0.839115	1.14861	0.199884	1.14861	89.5641	77.9763	4.23544e-05	0.000402731	2.86305	1.51755	2.86305	89.5641	31.2828
VDAC2	voltage dependent anion channel 2	VDAC2	VDAC2	protein_coding	6.43145e-05	0.000501326	2.02924	1.02094	2.02924	7488.61	3690.35	0.0299863	0.191934	1.46877	0.554611	1.46877	5420.28	3690.35	0.0678637	0.192302	0.723803	-0.46633	-1.38159	5420.28	7488.61
C18H11orf95	#N/A	C18H11orf95	C18H11orf95	protein_coding	4.74843e-23	6.23944e-21	0.234988	-2.08934	-4.25553	39.6813	168.865	0.00174969	0.0259574	0.671678	-0.574158	-1.48881	113.423	168.865	3.62434e-12	1.19059e-10	2.85835	1.51518	2.85835	113.423	39.6813
RGL1	ral guanine nucleotide dissociation stimulator like 1	RGL1	RGL1	protein_coding	7.25015e-06	7.22241e-05	2.02382	1.01708	2.02382	12926.8	6387.35	0.014989	0.122083	1.46575	0.551635	1.46575	9362.23	6387.35	0.0400283	0.129793	0.724248	-0.465444	-1.38074	9362.23	12926.8
ENSCAFG00000008287	#N/A	ENSCAFG00000008287	---	protein_coding	0.00112744	0.00576134	2.02372	1.01701	2.02372	103.941	51.3616	0.0314433	0.19822	1.60231	0.680155	1.60231	82.2972	51.3616	0.272823	0.48904	0.791765	-0.336856	-1.263	82.2972	103.941
HRH2	histamine receptor H2	HRH2	HRH2	protein_coding	0.00193628	0.00908976	0.405644	-1.30171	-2.46521	463.836	1143.45	0.61672	0.862397	1.15638	0.20961	1.15638	1322.26	1143.45	0.000319749	0.00242239	2.85071	1.51132	2.85071	1322.26	463.836
ENSCAFG00000042914	#N/A	ENSCAFG00000042914	---	protein_coding	0.000315613	0.00198655	2.01823	1.01309	2.01823	171.513	84.9816	0.124959	0.43012	1.35491	0.438194	1.35491	115.142	84.9816	0.0398075	0.129351	0.671333	-0.5749	-1.48957	115.142	171.513
ENSCAFG00000047709	#N/A	ENSCAFG00000047709	---	protein_coding	1.28138e-14	6.05453e-13	0.317484	-1.65524	-3.14976	1657.17	5219.68	0.498904	0.796687	0.904515	-0.144783	-1.10556	4721.29	5219.68	2.05588e-12	6.90144e-11	2.84901	1.51046	2.84901	4721.29	1657.17
MTUS1	microtubule associated scaffold protein 1	MTUS1	MTUS1	protein_coding	0.00104075	0.00538204	0.301544	-1.72956	-3.31627	42.5388	141.07	0.666048	0.885583	0.856546	-0.223397	-1.16748	120.833	141.07	0.00441912	0.0225067	2.84054	1.50616	2.84054	120.833	42.5388
WDR11	WD repeat domain 11	WDR11	WDR11	protein_coding	1.70262e-05	0.000153537	0.603204	-0.729283	-1.65781	1586.6	2630.29	4.60742e-06	0.000189192	1.70913	0.773266	1.70913	4495.52	2630.29	7.28003e-19	4.54491e-17	2.83343	1.50255	2.83343	4495.52	1586.6
ENSCAFG00000042347	#N/A	ENSCAFG00000042347	---	protein_coding	0.111096	0.227114	0.565552	-0.822269	-1.76818	850.619	1504.05	0.187138	0.529543	1.60226	0.680108	1.60226	2409.88	1504.05	0.00359529	0.0189982	2.83309	1.50238	2.83309	2409.88	850.619
SKA3	spindle and kinetochore associated complex subunit 3	SKA3	SKA3	protein_coding	2.4628e-05	0.000213841	0.416691	-1.26295	-2.39986	24.3383	58.4085	0.378255	0.714119	1.17787	0.236186	1.17787	68.7979	58.4085	5.60153e-07	8.12664e-06	2.82673	1.49914	2.82673	68.7979	24.3383
CTH	cystathionine gamma-lyase	CTH	CTH	protein_coding	0.000558396	0.00323616	2.00925	1.00666	2.00925	74.8993	37.2773	0.0586796	0.287472	1.47952	0.565131	1.47952	55.1526	37.2773	0.122474	0.291538	0.736356	-0.441525	-1.35804	55.1526	74.8993
ENSCAFG00000008154	#N/A	ENSCAFG00000008154	---	protein_coding	1.41895e-05	0.000130602	0.199119	-2.3283	-5.02213	35.5989	178.782	0.113222	0.407144	0.562007	-0.831339	-1.77934	100.477	178.782	0.005575	0.0272954	2.82247	1.49696	2.82247	100.477	35.5989
ENSCAFG00000011630	#N/A	ENSCAFG00000011630	---	protein_coding	1.75278e-11	5.2458e-10	4.9666	2.31226	4.9666	340.728	68.6038	9.37401e-07	4.60261e-05	3.23939	1.69572	3.23939	222.235	68.6038	0.0658764	0.188294	0.652235	-0.616536	-1.53319	222.235	340.728
LRRC8B	leucine rich repeat containing 8 VRAC subunit B	LRRC8B	LRRC8B	protein_coding	0.00111024	0.00569231	2.00231	1.00166	2.00231	801.05	400.064	0.00423339	0.0507455	1.83946	0.879279	1.83946	735.899	400.064	0.689443	0.83353	0.918668	-0.122384	-1.08853	735.899	801.05
RND3	Rho family GTPase 3	RND3	RND3	protein_coding	0.000546738	0.00317882	0.544794	-0.876218	-1.83556	1263.22	2318.71	0.014331	0.118469	1.53588	0.61907	1.53588	3561.27	2318.71	3.60349e-09	7.90778e-08	2.8192	1.49529	2.8192	3561.27	1263.22
SNAI1	snail family transcriptional repressor 1	SNAI1	SNAI1	protein_coding	1.268e-08	2.34826e-07	0.167578	-2.5771	-5.96737	72.6417	433.48	0.0153081	0.123657	0.472334	-1.08212	-2.11714	204.747	433.48	0.00102634	0.00663563	2.81859	1.49498	2.81859	204.747	72.6417
CPNE3	copine 3	CPNE3	CPNE3	protein_coding	1.6579e-06	1.9352e-05	0.515195	-0.956811	-1.94101	562.935	1092.66	0.00681343	0.0711081	1.44905	0.535109	1.44905	1583.33	1092.66	7.45948e-14	3.00054e-12	2.81263	1.49192	2.81263	1583.33	562.935
WIPF1	WAS/WASL interacting protein family member 1	WIPF1	WIPF1	protein_coding	0.151988	0.28659	0.861874	-0.214452	-1.16026	10726.9	12446.1	1.35818e-17	3.34622e-15	2.42386	1.27731	2.42386	30167.6	12446.1	2.09787e-23	1.79779e-21	2.81232	1.49176	2.81232	30167.6	10726.9
RBMS2	RNA binding motif single stranded interacting protein 2	RBMS2	RBMS2	protein_coding	1.60782e-15	8.49927e-14	0.122442	-3.02984	-8.16716	33.5049	273.64	2.22039e-05	0.000747189	0.344114	-1.53904	-2.90601	94.1633	273.64	0.000120165	0.00102277	2.81043	1.49079	2.81043	94.1633	33.5049
EPM2A	EPM2A glucan phosphatase, laforin	EPM2A	EPM2A	protein_coding	0.00072152	0.00398352	1.99325	0.995122	1.99325	144.114	72.3012	0.219342	0.566134	1.29069	0.368144	1.29069	93.3186	72.3012	0.0324632	0.110673	0.647532	-0.626978	-1.54433	93.3186	144.114
RARRES1	retinoic acid receptor responder 1	RARRES1	RARRES1	protein_coding	6.40078e-07	8.19217e-06	4.64462	2.21556	4.64462	305.236	65.7182	0.000160727	0.00381679	3.21501	1.68483	3.21501	211.285	65.7182	0.225758	0.432328	0.692202	-0.530735	-1.44467	211.285	305.236
ENSCAFG00000006315	#N/A	ENSCAFG00000006315	---	protein_coding	0.00898274	0.0321658	0.512429	-0.964576	-1.95149	31.9165	62.2847	0.135383	0.44882	1.43719	0.52325	1.43719	89.5149	62.2847	5.00075e-05	0.000465242	2.80466	1.48783	2.80466	89.5149	31.9165
CLCN4	chloride voltage-gated channel 4	CLCN4	CLCN4	protein_coding	0.000639419	0.00361116	0.484343	-1.0459	-2.06465	200.175	413.291	0.144493	0.465138	1.35833	0.441837	1.35833	561.387	413.291	1.16668e-06	1.59373e-05	2.80449	1.48774	2.80449	561.387	200.175
HPS3	HPS3 biogenesis of lysosomal organelles complex 2 subunit 1	HPS3	HPS3	protein_coding	0.00327186	0.0140585	0.594422	-0.75044	-1.68231	1224.36	2059.74	0.00406266	0.049212	1.65999	0.731178	1.65999	3419.16	2059.74	6.25112e-09	1.30282e-07	2.79262	1.48162	2.79262	3419.16	1224.36
RHBDF1	rhomboid 5 homolog 1	RHBDF1	RHBDF1	protein_coding	1.33696e-07	1.98913e-06	0.428426	-1.22288	-2.33412	182.588	426.183	0.26044	0.611614	1.19347	0.25516	1.19347	508.636	426.183	1.84646e-10	4.90859e-09	2.7857	1.47804	2.7857	508.636	182.588
MXD3	MAX dimerization protein 3	MXD3	MXD3	protein_coding	1.74869e-22	2.19334e-20	0.220855	-2.17883	-4.52786	112.912	511.251	0.00108054	0.0176012	0.614923	-0.701522	-1.62622	314.38	511.251	6.19201e-11	1.73994e-09	2.78429	1.47731	2.78429	314.38	112.912
PIF1	PIF1 5'-to-3' DNA helicase	PIF1	PIF1	protein_coding	0.0869045	0.188614	0.556413	-0.845773	-1.79723	29.5937	53.1867	0.189015	0.531831	1.54688	0.629361	1.54688	82.2734	53.1867	0.00267803	0.0148151	2.78009	1.47513	2.78009	82.2734	29.5937
TRIM69	tripartite motif containing 69	TRIM69	TRIM69	protein_coding	0.969088	0.981826	0.991395	-0.0124685	-1.00868	46.6495	47.0544	1.94119e-06	8.69563e-05	2.75477	1.46193	2.75477	129.624	47.0544	1.92792e-06	2.51176e-05	2.77868	1.4744	2.77868	129.624	46.6495
RGS7BP	regulator of G protein signaling 7 binding protein	RGS7BP	RGS7BP	protein_coding	1.13927e-10	3.07602e-09	0.0970502	-3.36512	-10.3039	6.95062	71.6188	3.80583e-05	0.00118531	0.269607	-1.89107	-3.7091	19.3089	71.6188	0.00735634	0.0343002	2.77801	1.47405	2.77801	19.3089	6.95062
IL27RA	interleukin 27 receptor subunit alpha	IL27RA	IL27RA	protein_coding	0.049484	0.122926	0.76803	-0.380766	-1.30203	805.321	1048.55	1.79396e-08	1.25641e-06	2.11958	1.08378	2.11958	2222.49	1048.55	3.42409e-14	1.43158e-12	2.75976	1.46454	2.75976	2222.49	805.321
NID1	nidogen 1	NID1	NID1	protein_coding	1.59433e-15	8.48379e-14	0.0718551	-3.79877	-13.9169	125.502	1746.6	7.96034e-07	4.00127e-05	0.198186	-2.33508	-5.04577	346.152	1746.6	0.00222246	0.0126929	2.75813	1.46369	2.75813	346.152	125.502
LBH	LBH regulator of WNT signaling pathway	LBH	LBH	protein_coding	0.444568	0.60617	0.783397	-0.352185	-1.27649	87.826	112.109	0.0148311	0.121439	2.15772	1.10951	2.15772	241.901	112.109	0.00141369	0.00873865	2.75432	1.4617	2.75432	241.901	87.826
MORN3	MORN repeat containing 3	MORN3	MORN3	protein_coding	0.00115884	0.00588464	0.480724	-1.05672	-2.0802	89.2167	185.588	0.204009	0.549321	1.3229	0.403708	1.3229	245.515	185.588	6.89881e-06	8.09378e-05	2.7519	1.46043	2.7519	245.515	89.2167
ADHFE1	alcohol dehydrogenase iron containing 1	ADHFE1	ADHFE1	protein_coding	0.0951896	0.202487	0.51846	-0.947696	-1.92879	6.62711	12.7823	0.314282	0.660128	1.42552	0.511485	1.42552	18.2214	12.7823	0.00924332	0.0412986	2.74952	1.45918	2.74952	18.2214	6.62711
DBN1	drebrin 1	DBN1	DBN1	protein_coding	0.0033572	0.0143581	0.45732	-1.12872	-2.18665	379.406	829.629	0.390689	0.722543	1.2562	0.329071	1.2562	1042.18	829.629	0.000151582	0.00125533	2.74688	1.4578	2.74688	1042.18	379.406
C9H17orf99	#N/A	C9H17orf99	C9H17orf99	protein_coding	2.37673e-21	2.56185e-19	11.933	3.57688	11.933	1508.39	126.406	1.10255e-40	1.69021e-37	32.7051	5.03144	32.7051	4134.11	126.406	8.63747e-05	0.000757963	2.74074	1.45456	2.74074	4134.11	1508.39
TIPARP	TCDD inducible poly(ADP-ribose) polymerase	TIPARP	TIPARP	protein_coding	1.43387e-07	2.12493e-06	0.41323	-1.27498	-2.41996	3054.06	7390.72	0.458228	0.769884	1.13253	0.179544	1.13253	8370.18	7390.72	1.95735e-09	4.49344e-08	2.74067	1.45453	2.74067	8370.18	3054.06
SCCPDH	saccharopine dehydrogenase (putative)	SCCPDH	SCCPDH	protein_coding	0.00158231	0.0076708	0.515091	-0.957101	-1.9414	618.293	1200.36	0.104492	0.391445	1.40444	0.489995	1.40444	1685.83	1200.36	1.76739e-06	2.32014e-05	2.72659	1.4471	2.72659	1685.83	618.293
BNC2	basonuclin 2	BNC2	BNC2	protein_coding	3.55563e-10	8.85506e-09	0.169046	-2.56452	-5.91556	70.6713	418.061	0.00528426	0.0595949	0.460199	-1.11967	-2.17297	192.391	418.061	0.000450333	0.0032496	2.72233	1.44484	2.72233	192.391	70.6713
SMYD5	SMYD family member 5	SMYD5	SMYD5	protein_coding	4.37356e-05	0.000354953	1.97462	0.981577	1.97462	490.92	248.615	0.0160699	0.128057	1.49611	0.581219	1.49611	371.955	248.615	0.0940587	0.243486	0.75767	-0.400358	-1.31984	371.955	490.92
PGF	placental growth factor	PGF	PGF	protein_coding	0.364498	0.529924	0.796651	-0.32798	-1.25525	179.366	225.15	0.00184176	0.0269753	2.16792	1.11631	2.16792	488.109	225.15	6.0081e-05	0.000548965	2.7213	1.44429	2.7213	488.109	179.366
IVNS1ABP	influenza virus NS1A binding protein	IVNS1ABP	IVNS1ABP	protein_coding	1.68312e-18	1.29732e-16	0.157443	-2.6671	-6.35152	1514.28	9617.99	5.55179e-05	0.00159247	0.428408	-1.22294	-2.33422	4120.43	9617.99	2.03473e-06	2.64342e-05	2.72105	1.44416	2.72105	4120.43	1514.28
ABHD6	abhydrolase domain containing 6, acylglycerol lipase	ABHD6	ABHD6	protein_coding	2.90256e-13	1.12491e-11	0.244864	-2.02995	-4.0839	139.245	568.662	0.0311867	0.196836	0.665585	-0.587305	-1.50244	378.493	568.662	2.49779e-07	3.89842e-06	2.71818	1.44264	2.71818	378.493	139.245
PKMYT1	protein kinase, membrane associated tyrosine/threonine 1	PKMYT1	PKMYT1	protein_coding	0.0200089	0.060368	0.592445	-0.755247	-1.68792	64.4976	108.867	0.0290965	0.188207	1.60897	0.686134	1.60897	175.163	108.867	7.78167e-06	9.02216e-05	2.71581	1.44138	2.71581	175.163	64.4976
AKR1E2	aldo-keto reductase family 1 member E2	AKR1E2	AKR1E2	protein_coding	2.62969e-11	7.71953e-10	0.310703	-1.68639	-3.21851	311.12	1001.34	0.324793	0.669158	0.842985	-0.24642	-1.18626	844.116	1001.34	1.3451e-08	2.64365e-07	2.71316	1.43997	2.71316	844.116	311.12
OSM	oncostatin M	OSM	OSM	protein_coding	0.206202	0.355799	0.641773	-0.639865	-1.55818	84.4686	131.618	0.110893	0.402524	1.73996	0.799057	1.73996	229.01	131.618	0.00435899	0.0223146	2.71118	1.43892	2.71118	229.01	84.4686
CDK2AP1	cyclin dependent kinase 2 associated protein 1	CDK2AP1	--- | CDK2AP1	--- | protein_coding	0.0332979	0.0901867	0.5432	-0.880443	-1.84094	50.9802	93.8516	0.166656	0.498739	1.47231	0.558081	1.47231	138.179	93.8516	0.000482177	0.0034484	2.71044	1.43852	2.71044	138.179	50.9802
RMND5A	required for meiotic nuclear division 5 homolog A	RMND5A	RMND5A	protein_coding	2.15571e-06	2.44793e-05	0.327008	-1.6126	-3.05803	230.554	705.041	0.603322	0.858414	0.8855	-0.175436	-1.12931	624.314	705.041	2.47537e-05	0.000251678	2.70788	1.43717	2.70788	624.314	230.554
ENSCAFG00000012123	#N/A	ENSCAFG00000012123	---	protein_coding	0.00544069	0.0214227	1.96617	0.975385	1.96617	250.046	127.174	0.231534	0.578827	1.34034	0.422595	1.34034	170.456	127.174	0.114377	0.278269	0.681701	-0.55279	-1.46692	170.456	250.046
SERINC5	serine incorporator 5	SERINC5	SERINC5	protein_coding	3.77319e-08	6.3025e-07	0.236111	-2.08246	-4.23529	620.045	2626.07	0.0853324	0.352706	0.637402	-0.649724	-1.56887	1673.86	2626.07	0.000155483	0.00128259	2.69958	1.43274	2.69958	1673.86	620.045
CDK6	cyclin dependent kinase 6	CDK6	CDK6	protein_coding	5.22181e-15	2.61983e-13	0.257549	-1.95708	-3.88276	273.881	1063.42	0.032473	0.202729	0.693308	-0.528432	-1.44236	737.274	1063.42	1.2682e-08	2.50424e-07	2.69195	1.42865	2.69195	737.274	273.881
MRTO4	MRT4 homolog, ribosome maturation factor	MRTO4	MRTO4	protein_coding	0.000481332	0.00286618	1.96414	0.973899	1.96414	493.063	251.032	0.129808	0.438034	1.34243	0.424843	1.34243	336.992	251.032	0.0486569	0.150418	0.683467	-0.549056	-1.46313	336.992	493.063
MAGI3	membrane associated guanylate kinase, WW and PDZ domain containing 3	MAGI3	MAGI3	protein_coding	0.0282332	0.0792379	0.688779	-0.537886	-1.45184	153.437	222.766	0.000206579	0.00462689	1.85167	0.888825	1.85167	412.489	222.766	4.40037e-09	9.44198e-08	2.68833	1.42671	2.68833	412.489	153.437
MAP1B	microtubule associated protein 1B	MAP1B	MAP1B	protein_coding	0.00158087	0.0076692	0.337458	-1.56722	-2.96333	7.31533	21.6777	0.74627	0.918135	0.907166	-0.140562	-1.10233	19.6653	21.6777	0.00472329	0.023775	2.68823	1.42666	2.68823	19.6653	7.31533
ENSCAFG00000030215	#N/A	ENSCAFG00000030215	---	protein_coding	0.00255354	0.011435	0.37022	-1.43354	-2.7011	11.2533	30.3961	0.977235	0.993875	0.991447	-0.0123931	-1.00863	30.1361	30.3961	0.00303976	0.0165051	2.67799	1.42115	2.67799	30.1361	11.2533
KCNMB3	potassium calcium-activated channel subfamily M regulatory beta subunit 3	KCNMB3	KCNMB3	protein_coding	0.000227073	0.00149543	0.365296	-1.45286	-2.73751	14.6814	40.1906	0.917878	0.97773	0.974865	-0.0367252	-1.02578	39.1804	40.1906	0.000378755	0.00279598	2.6687	1.41614	2.6687	39.1804	14.6814
BCHE	butyrylcholinesterase	BCHE	BCHE	protein_coding	0.137943	0.266816	0.600855	-0.734911	-1.66429	1426.68	2374.41	0.169725	0.503048	1.60193	0.679811	1.60193	3803.64	2374.41	0.00428867	0.0220324	2.66608	1.41472	2.66608	3803.64	1426.68
SLC7A11	solute carrier family 7 member 11	SLC7A11	SLC7A11	protein_coding	6.13345e-10	1.45151e-08	0.3758	-1.41196	-2.66099	1399.04	3722.84	0.992001	0.997072	1.00158	0.00228113	1.00158	3728.73	3722.84	5.83012e-10	1.44673e-08	2.6652	1.41424	2.6652	3728.73	1399.04
DEXI	Dexi homolog	DEXI	DEXI	protein_coding	7.71668e-12	2.42522e-10	0.371769	-1.42752	-2.68984	310.932	836.356	0.943509	0.984258	0.989966	-0.0145494	-1.01014	827.964	836.356	1.3646e-11	4.24996e-10	2.66285	1.41297	2.66285	827.964	310.932
TTC27	tetratricopeptide repeat domain 27	TTC27	TTC27	protein_coding	0.0073672	0.0273681	1.95604	0.967937	1.95604	511.571	261.534	0.193522	0.537842	1.38601	0.470934	1.38601	362.488	261.534	0.168289	0.357819	0.708578	-0.497002	-1.41128	362.488	511.571
ENSCAFG00000003299	#N/A	ENSCAFG00000003299	---	protein_coding	3.02756e-05	0.000258166	0.379565	-1.39758	-2.63459	43.7749	115.329	0.962101	0.988984	1.01061	0.0152297	1.01061	116.553	115.329	2.6908e-05	0.000270985	2.66255	1.41281	2.66255	116.553	43.7749
SLC26A2	solute carrier family 26 member 2	SLC26A2	SLC26A2	protein_coding	0.372583	0.537937	0.843871	-0.244906	-1.18502	194.724	230.751	1.64273e-05	0.000573792	2.24479	1.16658	2.24479	517.987	230.751	2.18662e-07	3.45181e-06	2.66011	1.41149	2.66011	517.987	194.724
KLHDC9	kelch domain containing 9	KLHDC9	KLHDC9	protein_coding	0.00335688	0.0143581	0.456418	-1.13157	-2.19097	190.796	418.029	0.466589	0.774756	1.21319	0.278808	1.21319	507.149	418.029	0.000256326	0.00199241	2.65807	1.41038	2.65807	507.149	190.796
ENSCAFG00000031907	#N/A	ENSCAFG00000031907	---	protein_coding	3.82458e-07	5.18347e-06	1.95275	0.965509	1.95275	175.286	89.7636	0.00866263	0.0833461	1.42594	0.511916	1.42594	127.998	89.7636	0.0152878	0.0614765	0.730222	-0.453593	-1.36945	127.998	175.286
PLOD2	procollagen-lysine,2-oxoglutarate 5-dioxygenase 2	PLOD2	PLOD2	protein_coding	0.00513536	0.0204186	0.505982	-0.982843	-1.97636	21.4172	42.3281	0.188315	0.531008	1.3418	0.424167	1.3418	56.7957	42.3281	5.48465e-05	0.000505489	2.65187	1.40701	2.65187	56.7957	21.4172
FURIN	furin, paired basic amino acid cleaving enzyme	FURIN	FURIN	protein_coding	5.66969e-07	7.37969e-06	0.535044	-0.902271	-1.86901	31279.4	58461.3	0.00517407	0.0588513	1.41834	0.504208	1.41834	82918.3	58461.3	6.34242e-15	2.86906e-13	2.65089	1.40648	2.65089	82918.3	31279.4
CXorf65	chromosome X open reading frame 65	CXorf65	CXorf65	protein_coding	0.203939	0.35331	0.66211	-0.594857	-1.51032	19.4817	29.4237	0.0686032	0.312898	1.75345	0.810195	1.75345	51.5929	29.4237	0.00229744	0.0130521	2.64827	1.40505	2.64827	51.5929	19.4817
TNS2	tensin 2	TNS2	TNS2	protein_coding	0.0544665	0.132699	0.624903	-0.678296	-1.60025	172.592	276.191	0.0378225	0.223294	1.65333	0.725376	1.65333	456.635	276.191	6.61544e-05	0.00059749	2.64574	1.40367	2.64574	456.635	172.592
SLC29A1	solute carrier family 29 member 1 (Augustine blood group)	SLC29A1	SLC29A1	protein_coding	1.10815e-07	1.68569e-06	0.380134	-1.39542	-2.63065	818.59	2153.43	0.99084	0.996764	1.00209	0.0030068	1.00209	2157.92	2153.43	1.05353e-07	1.75976e-06	2.63614	1.39843	2.63614	2157.92	818.59
DEF6	DEF6 guanine nucleotide exchange factor	DEF6	DEF6	protein_coding	0.0132703	0.0438223	0.518911	-0.946441	-1.92711	572.302	1102.89	0.236069	0.583072	1.36765	0.451704	1.36765	1508.37	1102.89	0.000253036	0.00197017	2.63562	1.39814	2.63562	1508.37	572.302
TST	thiosulfate sulfurtransferase	TST	TST	protein_coding	0.000513936	0.00301607	0.386794	-1.37036	-2.58536	27.3905	70.8143	0.953113	0.986438	1.0154	0.0220462	1.0154	71.9048	70.8143	0.000445444	0.00322107	2.62517	1.39241	2.62517	71.9048	27.3905
SLC4A5	solute carrier family 4 member 5	SLC4A5	SLC4A5	protein_coding	0.00119643	0.00605325	0.417224	-1.2611	-2.39679	96.7794	231.96	0.738956	0.9159	1.09268	0.127877	1.09268	253.459	231.96	0.00036369	0.00269776	2.61894	1.38898	2.61894	253.459	96.7794
LYAR	Ly1 antibody reactive	LYAR	LYAR	protein_coding	0.000262587	0.00169533	1.94451	0.959406	1.94451	562.756	289.408	0.199522	0.544202	1.26509	0.339241	1.26509	366.127	289.408	0.0182154	0.0707342	0.650597	-0.620165	-1.53705	366.127	562.756
DSE	dermatan sulfate epimerase	DSE	DSE	protein_coding	0.0074929	0.0277306	0.540388	-0.887934	-1.85052	7714.58	14276	0.132049	0.44254	1.41418	0.499962	1.41418	20188.8	14276	2.9175e-05	0.000290233	2.61697	1.3879	2.61697	20188.8	7714.58
RNF138	ring finger protein 138	RNF138	RNF138	protein_coding	1.02271e-05	9.81373e-05	1.94019	0.956201	1.94019	474.726	244.68	0.0298395	0.191309	1.38941	0.474468	1.38941	339.959	244.68	0.0256426	0.0919893	0.716117	-0.481733	-1.39642	339.959	474.726
H2BC18	H2B clustered histone 18	H2BC18	H2BC18	protein_coding	1.4125e-05	0.000130096	0.369472	-1.43646	-2.70656	40.4943	109.6	0.875948	0.965343	0.966481	-0.0491874	-1.03468	105.927	109.6	3.0806e-05	0.000304027	2.61584	1.38727	2.61584	105.927	40.4943
FOXO4	forkhead box O4	FOXO4	FOXO4	protein_coding	2.06529e-12	7.05316e-11	0.408044	-1.2932	-2.45072	643.657	1577.42	0.609721	0.86046	1.06659	0.0930001	1.06659	1682.46	1577.42	5.07824e-14	2.07907e-12	2.6139	1.3862	2.6139	1682.46	643.657
GALC	galactosylceramidase	GALC	GALC	protein_coding	0.000666731	0.00373801	0.530302	-0.915114	-1.88572	757.962	1429.3	0.0827564	0.346934	1.38012	0.464794	1.38012	1972.61	1429.3	2.84945e-07	4.39262e-06	2.60252	1.37991	2.60252	1972.61	757.962
STIM2	stromal interaction molecule 2	STIM2	STIM2	protein_coding	2.57793e-07	3.61093e-06	0.544956	-0.875787	-1.83501	330.011	605.574	0.00252136	0.0340208	1.41649	0.502322	1.41649	857.79	605.574	4.33012e-16	2.20452e-14	2.59927	1.37811	2.59927	857.79	330.011
PPM1L	protein phosphatase, Mg2+/Mn2+ dependent 1L	PPM1L	PPM1L	protein_coding	4.85589e-07	6.44819e-06	0.314387	-1.66939	-3.1808	266.716	848.37	0.369785	0.707421	0.81482	-0.295447	-1.22727	691.269	848.37	3.55185e-05	0.000344862	2.59178	1.37394	2.59178	691.269	266.716
ANKRD6	ankyrin repeat domain 6	ANKRD6	ANKRD6	protein_coding	0.347016	0.51294	1.22343	0.290936	1.22343	273.812	223.806	5.98368e-08	3.73561e-06	3.16803	1.66359	3.16803	709.024	223.806	7.53606e-06	8.78909e-05	2.58946	1.37265	2.58946	709.024	273.812
PGBD1	piggyBac transposable element derived 1	PGBD1	PGBD1	protein_coding	0.00745359	0.0276444	0.375951	-1.41138	-2.65992	11.0949	29.5115	0.936585	0.982038	0.973269	-0.0390894	-1.02747	28.7227	29.5115	0.00989182	0.0434919	2.58882	1.37229	2.58882	28.7227	11.0949
SLC16A11	solute carrier family 16 member 11	SLC16A11	SLC16A11	protein_coding	3.13326e-05	0.000266028	0.238338	-2.06892	-4.19572	7.34491	30.8172	0.110823	0.402493	0.616699	-0.697361	-1.62154	19.0049	30.8172	0.00780925	0.0359867	2.5875	1.37156	2.5875	19.0049	7.34491
MTHFD2	methylenetetrahydrofolate dehydrogenase (NADP+ dependent) 2, methenyltetrahydrofolate cyclohydrolase	MTHFD2	MTHFD2	protein_coding	0.0647022	0.150972	0.561745	-0.832013	-1.78017	1858.8	3308.98	0.231707	0.578827	1.45232	0.538362	1.45232	4805.7	3308.98	0.00234362	0.0132566	2.58538	1.37037	2.58538	4805.7	1858.8
ENSCAFG00000024768	#N/A	ENSCAFG00000024768	---	protein_coding	0.0153294	0.0490759	1.93295	0.950802	1.93295	89.981	46.5512	0.475155	0.780813	1.21844	0.28503	1.21844	56.7197	46.5512	0.0892681	0.234373	0.630352	-0.665771	-1.58642	56.7197	89.981
ENSCAFG00000008338	#N/A	ENSCAFG00000008338	---	protein_coding	0.0145456	0.047032	1.93281	0.950696	1.93281	52.4381	27.1306	0.380672	0.7164	1.27492	0.350402	1.27492	34.5892	27.1306	0.120898	0.289338	0.659619	-0.600294	-1.51603	34.5892	52.4381
PALM3	paralemmin 3	PALM3	PALM3	protein_coding	0.00227595	0.0104115	0.325753	-1.61815	-3.06981	7.92757	24.3361	0.601518	0.85761	0.840719	-0.250304	-1.18946	20.4598	24.3361	0.011349	0.0485225	2.58085	1.36784	2.58085	20.4598	7.92757
DHDH	dihydrodiol dehydrogenase	DHDH	DHDH	protein_coding	0.0698704	0.160107	0.505612	-0.983899	-1.9778	454.216	898.351	0.479587	0.783989	1.30417	0.383129	1.30417	1171.6	898.351	0.0117737	0.0499976	2.57939	1.36703	2.57939	1171.6	454.216
ENSCAFG00000044475	#N/A	ENSCAFG00000044475	---	protein_coding	4.63207e-06	4.8379e-05	1.92643	0.945933	1.92643	2844.82	1476.73	0.012487	0.10794	1.43049	0.516513	1.43049	2112.45	1476.73	0.0374065	0.123557	0.74256	-0.42942	-1.34669	2112.45	2844.82
LRRC27	leucine rich repeat containing 27	LRRC27	LRRC27	protein_coding	0.000202222	0.00135769	3.56495	1.83388	3.56495	54.857	15.3879	0.00103415	0.0169658	3.09379	1.62938	3.09379	47.6069	15.3879	0.661554	0.814516	0.867835	-0.204507	-1.15229	47.6069	54.857
FZD4	frizzled class receptor 4	FZD4	FZD4	protein_coding	5.28255e-06	5.44718e-05	0.232002	-2.10779	-4.3103	17.1458	73.9035	0.0882147	0.35945	0.596987	-0.744228	-1.67508	44.1194	73.9035	0.00387009	0.020218	2.57319	1.36356	2.57319	44.1194	17.1458
MCOLN3	mucolipin TRP cation channel 3	MCOLN3	MCOLN3	protein_coding	0.0233918	0.0681453	0.464621	-1.10587	-2.15229	30.5331	65.716	0.587198	0.851011	1.19525	0.257313	1.19525	78.5471	65.716	0.00519988	0.0257604	2.57253	1.36319	2.57253	78.5471	30.5331
CACNB1	calcium voltage-gated channel auxiliary subunit beta 1	CACNB1	CACNB1	protein_coding	0.00553438	0.0217296	1.92186	0.942506	1.92186	62.8302	32.6923	0.204265	0.549321	1.35846	0.44197	1.35846	44.4111	32.6923	0.13648	0.313261	0.706844	-0.500536	-1.41474	44.4111	62.8302
STS	steroid sulfatase	STS	STS	protein_coding	0.00241946	0.0109643	1.92179	0.942452	1.92179	149.427	77.754	0.0887911	0.360472	1.4482	0.534261	1.4482	112.603	77.754	0.185636	0.381475	0.753568	-0.408191	-1.32702	112.603	149.427
TIMM10	translocase of inner mitochondrial membrane 10	TIMM10	TIMM10	protein_coding	9.11372e-05	0.00068338	1.92112	0.941948	1.92112	487.644	253.833	0.0415091	0.234945	1.4079	0.493548	1.4079	357.372	253.833	0.0616436	0.179733	0.732855	-0.448401	-1.36453	357.372	487.644
SLC25A25	solute carrier family 25 member 25	SLC25A25	SLC25A25	protein_coding	0.000611093	0.00347537	1.92051	0.94149	1.92051	1037.83	540.392	0.0643884	0.302264	1.42325	0.509189	1.42325	769.113	540.392	0.115171	0.279708	0.741079	-0.432301	-1.34938	769.113	1037.83
TJP3	tight junction protein 3	TJP3	TJP3	protein_coding	0.00445961	0.0181347	0.446483	-1.16332	-2.23973	327.594	733.721	0.628169	0.869013	1.14662	0.197385	1.14662	841.298	733.721	0.000881794	0.00580999	2.56811	1.36071	2.56811	841.298	327.594
FCHO2	FCH and mu domain containing endocytic adaptor 2	FCHO2	FCHO2	protein_coding	0.000149439	0.00104714	0.511682	-0.966681	-1.95434	675.279	1319.73	0.120455	0.422182	1.31405	0.394016	1.31405	1734.18	1319.73	9.33881e-08	1.56749e-06	2.56809	1.3607	2.56809	1734.18	675.279
MTURN	maturin, neural progenitor differentiation regulator homolog	MTURN	MTURN	protein_coding	1.20115e-08	2.24252e-07	0.302742	-1.72384	-3.30314	97.7969	323.037	0.213621	0.559743	0.775127	-0.367495	-1.29011	250.395	323.037	8.24563e-06	9.47186e-05	2.56036	1.35634	2.56036	250.395	97.7969
MOB3A	MOB kinase activator 3A	MOB3A	MOB3A	protein_coding	0.0479236	0.119892	0.770649	-0.375853	-1.29761	1369.95	1777.66	2.23363e-07	1.22291e-05	1.97252	0.980041	1.97252	3506.47	1777.66	8.75255e-13	3.08846e-11	2.55956	1.35589	2.55956	3506.47	1369.95
ADO	2-aminoethanethiol dioxygenase	ADO	ADO	protein_coding	0.778907	0.867079	1.08786	0.121488	1.08786	139.578	128.306	0.000581492	0.0107979	2.78389	1.4771	2.78389	357.189	128.306	0.00159745	0.00965282	2.55906	1.35561	2.55906	357.189	139.578
ENOPH1	enolase-phosphatase 1	ENOPH1	ENOPH1	protein_coding	0.00832826	0.030229	1.91299	0.935826	1.91299	607.512	317.572	0.0242585	0.167431	1.74086	0.799798	1.74086	552.848	317.572	0.700626	0.840335	0.910021	-0.136028	-1.09888	552.848	607.512
EXOC6B	exocyst complex component 6B	EXOC6B	EXOC6B	protein_coding	6.90177e-07	8.7683e-06	1.91229	0.935305	1.91229	1957.39	1023.58	0.00506392	0.0581403	1.44317	0.529242	1.44317	1477.21	1023.58	0.0308915	0.10626	0.75468	-0.406063	-1.32506	1477.21	1957.39
CARHSP1	calcium regulated heat stable protein 1	CARHSP1	CARHSP1	protein_coding	4.78235e-10	1.16576e-08	0.238212	-2.06968	-4.19795	338.089	1419.28	0.0304616	0.193856	0.609038	-0.715397	-1.64193	864.395	1419.28	4.77692e-05	0.000447193	2.55671	1.35429	2.55671	864.395	338.089
CDC42BPA	CDC42 binding protein kinase alpha	CDC42BPA	CDC42BPA	protein_coding	0.466191	0.626287	0.770443	-0.376239	-1.29795	9.60615	12.4683	0.0389974	0.227046	1.96964	0.977935	1.96964	24.5582	12.4683	0.00637536	0.0305266	2.55651	1.35417	2.55651	24.5582	9.60615
ENSCAFG00000005091	#N/A	ENSCAFG00000005091	---	protein_coding	0.000503739	0.00297139	1.9114	0.934628	1.9114	852.301	445.904	0.289763	0.640785	1.21887	0.28554	1.21887	543.498	445.904	0.0156749	0.0627588	0.637683	-0.649088	-1.56818	543.498	852.301
GPAT2	glycerol-3-phosphate acyltransferase 2, mitochondrial	GPAT2	GPAT2	protein_coding	0.000228988	0.00150374	0.282726	-1.82252	-3.53699	9.75996	34.5208	0.296379	0.645882	0.721605	-0.470719	-1.3858	24.9104	34.5208	0.00760572	0.0352632	2.55231	1.3518	2.55231	24.9104	9.75996
ASAP1	ArfGAP with SH3 domain, ankyrin repeat and PH domain 1	ASAP1	ASAP1	protein_coding	0.159014	0.296036	0.872876	-0.196151	-1.14564	1924.83	2205.15	7.47815e-17	1.7789e-14	2.22732	1.15531	2.22732	4911.58	2205.15	2.14286e-22	1.69914e-20	2.5517	1.35146	2.5517	4911.58	1924.83
KLHL23	kelch like family member 23	KLHL23	KLHL23	protein_coding	0.00758665	0.0280174	0.439048	-1.18755	-2.27766	16.0463	36.5479	0.699474	0.900172	1.11761	0.160415	1.11761	40.8462	36.5479	0.00251213	0.0140266	2.54553	1.34796	2.54553	40.8462	16.0463
ENSCAFG00000029155	#N/A	ENSCAFG00000029155	---	protein_coding	1.32474e-05	0.000122832	1.90813	0.932161	1.90813	1373.86	720.005	0.0643563	0.302264	1.31682	0.397062	1.31682	948.119	720.005	0.0123231	0.0518517	0.690112	-0.535099	-1.44904	948.119	1373.86
ITGAV	integrin subunit alpha V	ITGAV	ITGAV	protein_coding	0.0068804	0.0259865	0.491068	-1.026	-2.03638	13599.9	27694.5	0.396679	0.726781	1.24983	0.321731	1.24983	34613.4	27694.5	0.00038522	0.0028346	2.54512	1.34773	2.54512	34613.4	13599.9
PLEKHA4	pleckstrin homology domain containing A4	PLEKHA4	PLEKHA4	protein_coding	0.0108441	0.0373853	1.90443	0.929355	1.90443	83.5242	43.858	0.00616562	0.0664067	1.9999	0.999926	1.9999	87.7115	43.858	0.843175	0.920282	1.05013	0.0705706	1.05013	87.7115	83.5242
ARRDC4	arrestin domain containing 4	ARRDC4	ARRDC4	protein_coding	0.00219816	0.0101161	1.94744	0.961577	1.94744	2213.84	1136.8	1.9257e-13	2.91966e-11	4.95006	2.30745	4.95006	5627.2	1136.8	1.74757e-05	0.000184478	2.54183	1.34587	2.54183	5627.2	2213.84
OSGIN2	oxidative stress induced growth inhibitor family member 2	OSGIN2	OSGIN2	protein_coding	0.165114	0.303784	0.719506	-0.474921	-1.38984	286.77	398.564	0.0104514	0.0954322	1.82867	0.870794	1.82867	728.842	398.564	8.07089e-05	0.000712881	2.54156	1.34571	2.54156	728.842	286.77
ETS2	ETS proto-oncogene 2, transcription factor	ETS2	ETS2	protein_coding	7.9917e-07	1.00056e-05	0.39324	-1.34652	-2.54298	10077	25625.6	0.996802	0.998843	0.999243	-0.00109317	-1.00076	25606.2	25625.6	8.16429e-07	1.15059e-05	2.54105	1.34542	2.54105	25606.2	10077
PNMA1	PNMA family member 1	PNMA1	PNMA1	protein_coding	1.43299e-08	2.63044e-07	0.302757	-1.72377	-3.30298	31.3281	103.476	0.179613	0.517785	0.769219	-0.378534	-1.30002	79.5959	103.476	1.38352e-05	0.000150658	2.54072	1.34523	2.54072	79.5959	31.3281
SLC16A5	solute carrier family 16 member 5	SLC16A5	SLC16A5	protein_coding	0.00340526	0.0145186	1.90046	0.926349	1.90046	355.677	187.153	0.309472	0.657804	1.25136	0.323497	1.25136	234.196	187.153	0.056484	0.168149	0.658451	-0.602851	-1.51872	234.196	355.677
FKBP3	FKBP prolyl isomerase 3	FKBP3	FKBP3	protein_coding	0.000512941	0.00301407	1.89656	0.923383	1.89656	557.041	293.712	0.208437	0.553784	1.26242	0.336194	1.26242	370.788	293.712	0.0270446	0.096045	0.665638	-0.58719	-1.50232	370.788	557.041
PICALM	phosphatidylinositol binding clathrin assembly protein	PICALM	PICALM	protein_coding	0.220907	0.373421	0.843964	-0.244747	-1.18488	9735.64	11535.6	3.77754e-08	2.47008e-06	2.14259	1.09935	2.14259	24716	11535.6	1.76912e-11	5.42413e-10	2.53872	1.3441	2.53872	24716	9735.64
PPP1R14B	protein phosphatase 1 regulatory inhibitor subunit 14B	PPP1R14B	PPP1R14B	protein_coding	0.000843311	0.00454321	1.89086	0.919045	1.89086	1496.07	791.208	0.091117	0.365023	1.38112	0.465834	1.38112	1092.75	791.208	0.0994874	0.252972	0.730415	-0.453211	-1.36908	1092.75	1496.07
ADGRA3	adhesion G protein-coupled receptor A3	ADGRA3	ADGRA3	protein_coding	0.000115315	0.000838695	0.248892	-2.00641	-4.01781	91.6554	368.254	0.195356	0.539847	0.629248	-0.668298	-1.5892	231.723	368.254	0.0103401	0.0451036	2.5282	1.33811	2.5282	231.723	91.6554
THEM4	thioesterase superfamily member 4	THEM4	THEM4	protein_coding	0.00425765	0.0174934	1.8888	0.917473	1.8888	288.235	152.602	0.381034	0.716522	1.21706	0.283401	1.21706	185.726	152.602	0.0481365	0.149211	0.644355	-0.634072	-1.55194	185.726	288.235
RNASEH2C	ribonuclease H2 subunit C	RNASEH2C	RNASEH2C	protein_coding	3.57137e-07	4.89317e-06	0.184555	-2.43787	-5.41843	110.158	596.881	0.0205681	0.151403	0.466469	-1.10015	-2.14377	278.426	596.881	0.00538062	0.0265035	2.52753	1.33773	2.52753	278.426	110.158
NME1	NME/NM23 nucleoside diphosphate kinase 1	NME1	NME1	protein_coding	0.0055846	0.0218894	1.88656	0.915761	1.88656	1475.51	782.113	0.123365	0.427442	1.42369	0.509637	1.42369	1113.49	782.113	0.218799	0.423824	0.754648	-0.406124	-1.32512	1113.49	1475.51
ENSCAFG00000015164	#N/A	ENSCAFG00000015164	---	protein_coding	0.0129663	0.0429832	1.88623	0.915507	1.88623	41.167	21.825	0.147686	0.469176	1.46017	0.546132	1.46017	31.8681	21.825	0.306195	0.523361	0.774118	-0.369374	-1.29179	31.8681	41.167
CLEC5A	C-type lectin domain containing 5A	CLEC5A	CLEC5A	protein_coding	2.84091e-16	1.62163e-14	0.29074	-1.7822	-3.4395	6245.83	21482.5	0.0377877	0.223184	0.730936	-0.452183	-1.36811	15702.3	21482.5	1.03635e-09	2.46101e-08	2.51405	1.33001	2.51405	15702.3	6245.83
CRYBG3	crystallin beta-gamma domain containing 3	CRYBG3	CRYBG3	protein_coding	0.00166367	0.00799502	0.610676	-0.711521	-1.63753	1054.26	1726.37	0.00609349	0.065935	1.53506	0.618295	1.53506	2650.09	1726.37	4.07161e-09	8.80503e-08	2.51371	1.32982	2.51371	2650.09	1054.26
SLC17A9	solute carrier family 17 member 9	SLC17A9	SLC17A9	protein_coding	0.000164763	0.00114233	1.88134	0.911761	1.88134	3128.89	1663.12	0.161629	0.490001	1.26495	0.339083	1.26495	2103.77	1663.12	0.0179358	0.0699211	0.672368	-0.572677	-1.48728	2103.77	3128.89
GINS1	GINS complex subunit 1	GINS1	GINS1	protein_coding	1.57721e-14	7.32688e-13	0.509552	-0.972698	-1.96251	723.773	1420.41	0.00413901	0.0499178	1.28054	0.35675	1.28054	1818.89	1420.41	8.07324e-26	8.07149e-24	2.51307	1.32945	2.51307	1818.89	723.773
GTPBP4	GTP binding protein 4	GTPBP4	GTPBP4	protein_coding	0.00801062	0.0292697	1.87791	0.909128	1.87791	1786.09	951.107	0.238695	0.585129	1.32347	0.404329	1.32347	1258.76	951.107	0.140821	0.319505	0.704758	-0.5048	-1.41893	1258.76	1786.09
ENSCAFG00000008661	#N/A	ENSCAFG00000008661	---	protein_coding	5.82529e-16	3.24079e-14	0.317551	-1.65494	-3.1491	1193.16	3757.39	0.108836	0.398331	0.797456	-0.326524	-1.25399	2996.35	3757.39	8.58657e-11	2.35994e-09	2.51127	1.32841	2.51127	2996.35	1193.16
ZBTB32	zinc finger and BTB domain containing 32	ZBTB32	ZBTB32	protein_coding	0.286578	0.450691	0.70986	-0.494394	-1.40873	22.7775	32.0874	0.060774	0.293079	1.7823	0.833743	1.7823	57.1894	32.0874	0.00364852	0.0192279	2.51078	1.32814	2.51078	57.1894	22.7775
ZNHIT3	zinc finger HIT-type containing 3	ZNHIT3	ZNHIT3	protein_coding	0.00239042	0.0108632	1.87558	0.907339	1.87558	313.589	167.195	0.150202	0.471736	1.34963	0.432562	1.34963	225.651	167.195	0.111172	0.273022	0.719578	-0.474777	-1.3897	225.651	313.589
ALCAM	activated leukocyte cell adhesion molecule	ALCAM	ALCAM	protein_coding	1.35537e-12	4.73419e-11	0.443302	-1.17364	-2.2558	6327.54	14273.7	0.352742	0.693966	1.11239	0.153664	1.11239	15877.9	14273.7	1.09383e-15	5.42864e-14	2.50933	1.3273	2.50933	15877.9	6327.54
PC	pyruvate carboxylase	PC	PC	protein_coding	0.000147786	0.00103766	1.87427	0.906329	1.87427	226.861	121.039	0.0338244	0.207966	1.42653	0.512514	1.42653	172.667	121.039	0.0966275	0.248032	0.761114	-0.393816	-1.31386	172.667	226.861
PPRC1	PPARG related coactivator 1	PPRC1	PPRC1	protein_coding	0.00103368	0.00535549	1.87355	0.905774	1.87355	840.858	448.805	0.223094	0.569816	1.2635	0.337424	1.2635	567.064	448.805	0.0394098	0.128361	0.674388	-0.568349	-1.48283	567.064	840.858
MSH3	mutS homolog 3	MSH3	MSH3	protein_coding	7.2143e-05	0.000553899	1.87346	0.905708	1.87346	491.677	262.443	0.0892479	0.3611	1.31098	0.390641	1.31098	344.056	262.443	0.0237074	0.0864635	0.69976	-0.515067	-1.42906	344.056	491.677
FASTKD2	FAST kinase domains 2	FASTKD2	FASTKD2	protein_coding	1.05738e-05	0.0001011	1.87186	0.904476	1.87186	403.789	215.715	0.0524134	0.269806	1.32185	0.402559	1.32185	285.143	215.715	0.0141745	0.0577912	0.706168	-0.501917	-1.41609	285.143	403.789
H2AC6	H2A clustered histone 6	H2AC6	H2AC6	protein_coding	0.031745	0.0870177	0.462618	-1.11211	-2.16161	35.5268	76.795	0.671575	0.886279	1.16062	0.2149	1.16062	89.1301	76.795	0.0104265	0.04538	2.50881	1.32701	2.50881	89.1301	35.5268
IFI35	interferon induced protein 35	IFI35	IFI35	protein_coding	0.0112338	0.0383906	1.871	0.903813	1.871	1438.4	768.784	0.476272	0.781812	1.19273	0.254265	1.19273	916.95	768.784	0.0684446	0.193219	0.63748	-0.649548	-1.56868	916.95	1438.4
PTGER4	prostaglandin E receptor 4	PTGER4	PTGER4	protein_coding	0.00799932	0.0292362	0.611042	-0.710657	-1.63655	3700.12	6055.43	0.021934	0.157272	1.53004	0.613569	1.53004	9265.04	6055.43	7.7152e-07	1.09513e-05	2.50399	1.32423	2.50399	9265.04	3700.12
ABL2	ABL proto-oncogene 2, non-receptor tyrosine kinase	ABL2	ABL2	protein_coding	0.840772	0.906241	1.02186	0.0311964	1.02186	327.534	320.528	3.74309e-19	1.0988e-16	2.55557	1.35364	2.55557	819.129	320.528	3.12406e-18	1.88221e-16	2.5009	1.32245	2.5009	819.129	327.534
FAM210B	family with sequence similarity 210 member B	FAM210B	FAM210B	protein_coding	0.0139137	0.0455113	1.86721	0.900886	1.86721	635.864	340.542	0.0053809	0.0604562	2.02719	1.01948	2.02719	690.344	340.542	0.745403	0.867629	1.08568	0.118598	1.08568	690.344	635.864
SESN2	sestrin 2	SESN2	SESN2	protein_coding	0.00868548	0.0313126	0.681653	-0.55289	-1.46702	1323.36	1941.4	0.0002934	0.00620291	1.6939	0.76035	1.6939	3288.53	1941.4	4.39656e-10	1.1029e-08	2.48499	1.31324	2.48499	3288.53	1323.36
ENSCAFG00000028603	#N/A	ENSCAFG00000028603	---	protein_coding	0.161032	0.298321	0.731897	-0.450287	-1.36631	1168.08	1595.96	0.00750152	0.0760459	1.81199	0.857571	1.81199	2891.85	1595.96	4.63178e-05	0.000436209	2.47574	1.30786	2.47574	2891.85	1168.08
PAK1IP1	PAK1 interacting protein 1	PAK1IP1	PAK1IP1	protein_coding	0.000290063	0.00185278	1.86448	0.898776	1.86448	610.45	327.41	0.0662327	0.307544	1.37318	0.45752	1.37318	449.592	327.41	0.0746103	0.205856	0.736493	-0.441255	-1.35779	449.592	610.45
MXD4	MAX dimerization protein 4	MXD4	MXD4	protein_coding	7.23643e-06	7.21395e-05	0.416218	-1.26459	-2.40258	574.787	1380.97	0.88426	0.968401	1.02872	0.0408502	1.02872	1420.64	1380.97	3.66879e-06	4.52868e-05	2.47159	1.30544	2.47159	1420.64	574.787
GAS7	growth arrest specific 7	GAS7	GAS7	protein_coding	0.0154749	0.0494574	0.538552	-0.892842	-1.85683	2630.27	4883.96	0.263198	0.613918	1.33088	0.412383	1.33088	6499.98	4883.96	0.000401022	0.00293523	2.47122	1.30522	2.47122	6499.98	2630.27
VIM	vimentin	VIM	VIM	protein_coding	1.91534e-10	4.93021e-09	0.25327	-1.98125	-3.94836	6288.19	24828	0.029712	0.190848	0.625863	-0.676082	-1.59779	15538.9	24828	2.73226e-05	0.00027436	2.47113	1.30517	2.47113	15538.9	6288.19
TMLHE	trimethyllysine hydroxylase, epsilon	TMLHE	TMLHE	protein_coding	1.9291e-23	2.66158e-21	32.3815	5.0171	32.3815	108.309	3.34478	1.05113e-36	1.20854e-33	79.835	6.31895	79.835	267.031	3.34478	4.45375e-07	6.60025e-06	2.46545	1.30185	2.46545	267.031	108.309
ENSCAFG00000042167	#N/A	ENSCAFG00000042167	---	protein_coding	0.0141705	0.0461544	0.471951	-1.08329	-2.11886	24.7877	52.5217	0.606593	0.859403	1.16308	0.217953	1.16308	61.087	52.5217	0.00324025	0.0173779	2.46441	1.30124	2.46441	61.087	24.7877
WDR27	WD repeat domain 27	WDR27	WDR27	protein_coding	0.000651142	0.00366986	0.396758	-1.33367	-2.52043	142.047	358.02	0.93301	0.981528	0.977669	-0.0325814	-1.02284	350.025	358.02	0.000894577	0.00587988	2.46414	1.30109	2.46414	350.025	142.047
P2RX2	purinergic receptor P2X 2	P2RX2	P2RX2	protein_coding	0.132686	0.259156	1.42708	0.513062	1.42708	88.0217	61.6798	6.06072e-08	3.76665e-06	3.51295	1.81268	3.51295	216.678	61.6798	8.69528e-05	0.000761706	2.46164	1.29962	2.46164	216.678	88.0217
AARS2	alanyl-tRNA synthetase 2, mitochondrial	AARS2	AARS2	protein_coding	7.11302e-06	7.10118e-05	1.85953	0.894939	1.85953	942.349	506.767	0.0492379	0.260434	1.31391	0.393863	1.31391	665.844	506.767	0.0118122	0.050136	0.706579	-0.501076	-1.41527	665.844	942.349
IFFO2	intermediate filament family orphan 2	IFFO2	IFFO2	protein_coding	0.000237854	0.00155603	0.449116	-1.15484	-2.22659	95.4268	212.477	0.646401	0.877085	1.10276	0.141122	1.10276	234.311	212.477	3.80959e-05	0.000366128	2.4554	1.29596	2.4554	234.311	95.4268
B9D1	B9 domain containing 1	B9D1	B9D1	protein_coding	0.000184051	0.00124968	0.393912	-1.34406	-2.53864	40.1582	101.947	0.886299	0.969049	0.966337	-0.0494024	-1.03484	98.5153	101.947	0.000340708	0.00255263	2.45318	1.29465	2.45318	98.5153	40.1582
PHEX	phosphate regulating endopeptidase homolog X-linked	PHEX	PHEX	protein_coding	3.7127e-07	5.05777e-06	0.184423	-2.43891	-5.42233	11.8714	64.3706	0.00967075	0.0900177	0.450928	-1.14903	-2.21765	29.0265	64.3706	0.00934992	0.0416535	2.44508	1.28988	2.44508	29.0265	11.8714
ENSCAFG00000010923	#N/A	ENSCAFG00000010923	---	protein_coding	2.86907e-07	3.98637e-06	0.232694	-2.1035	-4.2975	63.8629	274.451	0.0426944	0.239064	0.568257	-0.815385	-1.75977	155.958	274.451	0.00181425	0.0107338	2.44208	1.28811	2.44208	155.958	63.8629
ENSCAFG00000004629	#N/A	ENSCAFG00000004629	---	protein_coding	0.0705688	0.161519	0.727295	-0.459387	-1.37496	731.357	1005.58	0.00110128	0.0178475	1.7723	0.825619	1.7723	1782.19	1005.58	4.06751e-07	6.05387e-06	2.43683	1.28501	2.43683	1782.19	731.357
MXD1	MAX dimerization protein 1	MXD1	MXD1	protein_coding	2.80727e-05	0.000241321	0.292375	-1.77411	-3.42027	2170.89	7425.03	0.246123	0.59325	0.711538	-0.490986	-1.40541	5283.19	7425.03	0.00245411	0.013764	2.43365	1.28312	2.43365	5283.19	2170.89
ENSCAFG00000005305	#N/A	ENSCAFG00000005305	---	protein_coding	0.00011947	0.000864355	0.45841	-1.12529	-2.18145	171.423	373.95	0.587912	0.851123	1.11448	0.156365	1.11448	416.758	373.95	1.19495e-05	0.000131999	2.43118	1.28165	2.43118	416.758	171.423
METTL16	methyltransferase 16, N6-methyladenosine	METTL16	METTL16	protein_coding	0.00343756	0.0146207	1.85181	0.888939	1.85181	511.364	276.142	0.156764	0.481933	1.34891	0.431793	1.34891	372.491	276.142	0.131899	0.306256	0.728426	-0.457145	-1.37282	372.491	511.364
GADD45G	growth arrest and DNA damage inducible gamma	GADD45G	GADD45G	protein_coding	7.28136e-16	3.95515e-14	0.540426	-0.887832	-1.85039	555.824	1028.49	0.000314555	0.00654588	1.30582	0.384958	1.30582	1343.03	1028.49	4.86384e-31	6.91818e-29	2.41628	1.27279	2.41628	1343.03	555.824
CHPF	chondroitin polymerizing factor	CHPF	CHPF	protein_coding	0.000400757	0.00244859	1.84879	0.886584	1.84879	570.286	308.464	0.196523	0.540664	1.25298	0.325366	1.25298	386.5	308.464	0.0249437	0.0900675	0.67773	-0.561218	-1.47551	386.5	570.286
POMGNT2	protein O-linked mannose N-acetylglucosaminyltransferase 2 (beta 1,4-)	POMGNT2	POMGNT2	protein_coding	0.0180981	0.0558986	0.493576	-1.01865	-2.02603	35.8071	72.5462	0.547873	0.827478	1.19031	0.251338	1.19031	86.3525	72.5462	0.0032144	0.0172631	2.4116	1.26999	2.4116	86.3525	35.8071
CA11	carbonic anhydrase 11	CA11	CA11	protein_coding	0.00810879	0.029558	0.426511	-1.22935	-2.34461	22.028	51.6471	0.930258	0.980817	1.02736	0.0389485	1.02736	53.0604	51.6471	0.00655052	0.0311647	2.40877	1.2683	2.40877	53.0604	22.028
WNK2	WNK lysine deficient protein kinase 2	WNK2	WNK2	protein_coding	0.00811474	0.0295719	1.84491	0.883549	1.84491	1119.47	606.791	0.0593054	0.289539	1.54751	0.629952	1.54751	939.017	606.791	0.446877	0.655841	0.838803	-0.253596	-1.19218	939.017	1119.47
FASTKD1	FAST kinase domains 1	FASTKD1	FASTKD1	protein_coding	4.16195e-05	0.000339979	1.84315	0.882175	1.84315	204.981	111.212	0.0135287	0.114023	1.45265	0.538682	1.45265	161.552	111.212	0.106586	0.264667	0.788131	-0.343492	-1.26882	161.552	204.981
SLC26A6	solute carrier family 26 member 6	SLC26A6	SLC26A6	protein_coding	1.50509e-14	7.01545e-13	0.391053	-1.35456	-2.5572	1950.98	4989.03	0.620365	0.864641	0.941484	-0.0869918	-1.06215	4697.09	4989.03	6.50153e-13	2.34821e-11	2.40756	1.26757	2.40756	4697.09	1950.98
ENSCAFG00000043021	#N/A	ENSCAFG00000043021	---	protein_coding	8.3481e-11	2.31283e-09	0.185132	-2.43337	-5.40155	172.506	931.798	0.00170494	0.0253755	0.445645	-1.16603	-2.24394	415.251	931.798	0.000755026	0.00507655	2.40717	1.26734	2.40717	415.251	172.506
MACROH2A2	macroH2A.2 histone	MACROH2A2	MACROH2A2	protein_coding	0.00218546	0.0100643	1.84123	0.880668	1.84123	51.4128	27.9231	0.00475532	0.0551337	1.76455	0.819297	1.76455	49.2716	27.9231	0.82287	0.909852	0.958353	-0.0613713	-1.04346	49.2716	51.4128
CROCC	ciliary rootlet coiled-coil, rootletin	CROCC	CROCC	protein_coding	0.00787137	0.0289141	0.56641	-0.820081	-1.76551	269.705	476.166	0.146937	0.468401	1.36056	0.444201	1.36056	647.853	476.166	4.12586e-05	0.000393668	2.40208	1.26428	2.40208	647.853	269.705
ZNF672	zinc finger protein 672	ZNF672	ZNF672	protein_coding	1.16514e-13	4.79865e-12	2.4784	1.30941	2.4784	459.66	185.466	9.18659e-20	2.88062e-17	3.03324	1.60086	3.03324	562.564	185.466	0.0873206	0.230577	1.22387	0.29145	1.22387	562.564	459.66
ENSCAFG00000029405	#N/A	ENSCAFG00000029405	---	protein_coding	3.80916e-29	7.72866e-27	0.343308	-1.54242	-2.91284	701.051	2042.05	0.0386059	0.226176	0.823338	-0.280443	-1.21457	1681.3	2042.05	6.50851e-20	4.42354e-18	2.39825	1.26198	2.39825	1681.3	701.051
ST3GAL2	ST3 beta-galactoside alpha-2,3-sialyltransferase 2	ST3GAL2	ST3GAL2	protein_coding	3.49629e-35	9.84457e-33	0.363617	-1.45951	-2.75015	1740.84	4787.57	0.0900635	0.362516	0.871628	-0.198215	-1.14728	4172.98	4787.57	1.29345e-26	1.41633e-24	2.39711	1.26129	2.39711	4172.98	1740.84
F11	coagulation factor XI	F11	F11	protein_coding	0.000756352	0.00413939	1.83724	0.877538	1.83724	9475.57	5157.51	0.248661	0.596552	1.23169	0.300642	1.23169	6352.46	5157.51	0.0268003	0.0953984	0.670405	-0.576896	-1.49164	6352.46	9475.57
SLC37A2	solute carrier family 37 member 2	SLC37A2	SLC37A2	protein_coding	2.61014e-15	1.35895e-13	0.279231	-1.84047	-3.58127	3699.76	13249.8	0.0127005	0.109382	0.669274	-0.579331	-1.49416	8867.76	13249.8	6.04364e-08	1.06087e-06	2.39685	1.26114	2.39685	8867.76	3699.76
CEPT1	choline/ethanolamine phosphotransferase 1	CEPT1	CEPT1	protein_coding	1.32458e-05	0.000122832	1.83637	0.876854	1.83637	3050.64	1661.24	0.0640129	0.301726	1.29538	0.373371	1.29538	2151.93	1661.24	0.0123445	0.0519102	0.705402	-0.503483	-1.41763	2151.93	3050.64
TMEM170B	transmembrane protein 170B	TMEM170B	TMEM170B	protein_coding	9.50159e-22	1.0572e-19	0.347089	-1.52662	-2.88111	417.456	1202.73	0.0884005	0.359782	0.831379	-0.266422	-1.20282	999.929	1202.73	3.41771e-15	1.60388e-13	2.39529	1.2602	2.39529	999.929	417.456
FGL2	fibrinogen like 2	FGL2	FGL2	protein_coding	5.90697e-08	9.58805e-07	0.362054	-1.46572	-2.76202	4622.95	12768.7	0.440397	0.759515	0.865468	-0.208447	-1.15544	11050.9	12768.7	3.3186e-06	4.14359e-05	2.39044	1.25728	2.39044	11050.9	4622.95
QRSL1	glutaminyl-tRNA amidotransferase subunit QRSL1	QRSL1	QRSL1	protein_coding	1.11874e-06	1.36303e-05	1.8347	0.875544	1.8347	253.232	138.023	0.0161214	0.128138	1.35746	0.440912	1.35746	187.362	138.023	0.0147338	0.0598063	0.739882	-0.434633	-1.35157	187.362	253.232
SUOX	sulfite oxidase	SUOX	SUOX	protein_coding	0.000781558	0.00425707	0.574008	-0.800858	-1.74214	1276.62	2224.05	0.0601753	0.291796	1.3631	0.446891	1.3631	3031.6	2224.05	1.6488e-07	2.66515e-06	2.37471	1.24775	2.37471	3031.6	1276.62
GAS2L1	growth arrest specific 2 like 1	GAS2L1	GAS2L1	protein_coding	0.152381	0.287095	0.735431	-0.443338	-1.35975	1365.47	1856.7	0.0094398	0.088299	1.74462	0.802912	1.74462	3239.23	1856.7	5.69249e-05	0.000522224	2.37224	1.24625	2.37224	3239.23	1365.47
AKT3	AKT serine/threonine kinase 3	AKT3	AKT3	protein_coding	4.18303e-06	4.41233e-05	0.542758	-0.881618	-1.84244	801.817	1477.3	0.0558965	0.279558	1.28685	0.363849	1.28685	1901.07	1477.3	7.84024e-11	2.16777e-09	2.37095	1.24547	2.37095	1901.07	801.817
ENSCAFG00000042084	#N/A	ENSCAFG00000042084	---	protein_coding	0.00366424	0.015418	1.82987	0.87174	1.82987	152.914	83.5658	0.0749783	0.328475	1.453	0.539032	1.453	121.421	83.5658	0.263814	0.478224	0.794045	-0.332707	-1.25937	121.421	152.914
SCRN1	secernin 1	SCRN1	SCRN1	protein_coding	0.000116281	0.000845276	0.340965	-1.5523	-2.93285	35.2493	103.381	0.42692	0.748725	0.80712	-0.309144	-1.23897	83.4408	103.381	0.00222267	0.0126929	2.36716	1.24316	2.36716	83.4408	35.2493
SMIM3	small integral membrane protein 3	SMIM3	SMIM3	protein_coding	0.000227641	0.00149709	0.474666	-1.07501	-2.10674	157.614	332.053	0.563461	0.835741	1.12199	0.166062	1.12199	372.56	332.053	2.11552e-05	0.000218145	2.36375	1.24108	2.36375	372.56	157.614
PTER	phosphotriesterase related	PTER	PTER	protein_coding	0.482759	0.640874	0.789584	-0.340835	-1.26649	12.749	16.1465	0.0473594	0.254446	1.86599	0.899941	1.86599	30.1292	16.1465	0.00839505	0.0381401	2.36326	1.24078	2.36326	30.1292	12.749
NUPR2	nuclear protein 2, transcriptional regulator	NUPR2	NUPR2	protein_coding	1.11881e-05	0.000105946	0.453161	-1.1419	-2.20672	84.9712	187.508	0.69585	0.899021	1.07043	0.0981892	1.07043	200.714	187.508	1.9677e-06	2.56117e-05	2.36214	1.24009	2.36214	200.714	84.9712
EARS2	glutamyl-tRNA synthetase 2, mitochondrial	EARS2	EARS2	protein_coding	0.0122815	0.0412985	1.82717	0.869608	1.82717	205.583	112.515	0.0396847	0.228996	1.64309	0.716414	1.64309	184.872	112.515	0.657088	0.811479	0.899257	-0.153194	-1.11203	184.872	205.583
STOML2	stomatin like 2	STOML2	STOML2	protein_coding	2.21085e-05	0.00019404	1.82685	0.869361	1.82685	1044.31	571.643	0.0780871	0.336047	1.28572	0.362576	1.28572	734.972	571.643	0.0133085	0.0551073	0.703789	-0.506785	-1.42088	734.972	1044.31
ABCC1	ATP binding cassette subfamily C member 1	ABCC1	ABCC1	protein_coding	2.17892e-08	3.83941e-07	0.371724	-1.4277	-2.69017	1863.59	5013.38	0.461211	0.771874	0.878039	-0.187643	-1.1389	4401.94	5013.38	1.17454e-06	1.59971e-05	2.36207	1.24005	2.36207	4401.94	1863.59
ENSCAFG00000023602	#N/A	ENSCAFG00000023602	---	protein_coding	8.03271e-08	1.26515e-06	0.190776	-2.39005	-5.24176	29.5289	154.783	0.00757185	0.076366	0.450611	-1.15005	-2.21921	69.7471	154.783	0.00618057	0.0298367	2.36199	1.24	2.36199	69.7471	29.5289
PVR	PVR cell adhesion molecule	PVR	PVR	protein_coding	0.211996	0.362622	0.779961	-0.358526	-1.28212	1446.2	1854.19	0.0022073	0.0309493	1.83765	0.877863	1.83765	3407.36	1854.19	1.65473e-05	0.000176432	2.35608	1.23639	2.35608	3407.36	1446.2
TBC1D7	TBC1 domain family member 7	TBC1D7	TBC1D7	protein_coding	8.84274e-08	1.37546e-06	0.445654	-1.166	-2.24389	522.664	1172.8	0.759917	0.924724	1.04688	0.0660984	1.04688	1227.79	1172.8	1.62747e-08	3.15368e-07	2.34909	1.2321	2.34909	1227.79	522.664
BAG2	BAG cochaperone 2	BAG2	BAG2	protein_coding	0.000463566	0.00277717	1.82354	0.866741	1.82354	391.471	214.677	0.0334827	0.206694	1.44311	0.529184	1.44311	309.803	214.677	0.170952	0.361586	0.79138	-0.337557	-1.26361	309.803	391.471
MPZL1	myelin protein zero like 1	MPZL1	MPZL1	protein_coding	1.81823e-13	7.25033e-12	0.442755	-1.17542	-2.25859	209.753	473.744	0.723794	0.909813	1.03842	0.0543857	1.03842	491.944	473.744	1.69529e-14	7.3751e-13	2.34535	1.22981	2.34535	491.944	209.753
TMEM51	transmembrane protein 51	TMEM51	TMEM51	protein_coding	0.0218216	0.0646182	0.633987	-0.657475	-1.57732	1719.11	2711.58	0.0455976	0.248758	1.48691	0.57232	1.48691	4031.88	2711.58	1.77943e-05	0.000187411	2.34534	1.22979	2.34534	4031.88	1719.11
RAB7B	RAB7B, member RAS oncogene family	RAB7B	RAB7B	protein_coding	2.52472e-08	4.37607e-07	0.353522	-1.50013	-2.82867	1563.84	4423.59	0.313837	0.659926	0.82891	-0.270713	-1.2064	3666.76	4423.59	5.01372e-06	6.0467e-05	2.34472	1.22941	2.34472	3666.76	1563.84
PLXNA3	plexin A3	PLXNA3	PLXNA3	protein_coding	0.00107859	0.00554654	0.599696	-0.737697	-1.66751	620.978	1035.49	0.0292487	0.188749	1.40346	0.488992	1.40346	1453.27	1035.49	5.30693e-08	9.4599e-07	2.34029	1.22669	2.34029	1453.27	620.978
TBXAS1	thromboxane A synthase 1	TBXAS1	TBXAS1	protein_coding	1.5822e-06	1.85626e-05	0.540426	-0.887832	-1.85039	12970.3	24000.1	0.0690896	0.314182	1.26228	0.336036	1.26228	30295	24000.1	3.65779e-11	1.07375e-09	2.33572	1.22387	2.33572	30295	12970.3
GMPPB	GDP-mannose pyrophosphorylase B	GMPPB	GMPPB	protein_coding	0.000203605	0.00136499	1.82211	0.865612	1.82211	1744.22	957.254	0.018584	0.141036	1.46328	0.549206	1.46328	1400.73	957.254	0.174054	0.36607	0.803068	-0.316406	-1.24522	1400.73	1744.22
EMP3	epithelial membrane protein 3	EMP3	EMP3	protein_coding	8.01345e-07	1.00237e-05	0.397146	-1.33226	-2.51797	2068.97	5209.59	0.676967	0.889079	0.9251	-0.112319	-1.08096	4819.39	5209.59	6.24545e-06	7.40279e-05	2.32937	1.21994	2.32937	4819.39	2068.97
HSPBP1	HSPA (Hsp70) binding protein 1	HSPBP1	HSPBP1	protein_coding	0.00568093	0.0222102	1.82054	0.864365	1.82054	675.439	371.011	0.0890401	0.360726	1.44641	0.532475	1.44641	536.633	371.011	0.287537	0.505177	0.794495	-0.331891	-1.25866	536.633	675.439
EIF2S1	eukaryotic translation initiation factor 2 subunit alpha	EIF2S1	EIF2S1	protein_coding	0.000305732	0.00193497	1.82031	0.864188	1.82031	1811.23	995.01	0.154035	0.477715	1.26735	0.34182	1.26735	1261.03	995.01	0.0290325	0.101434	0.696228	-0.522368	-1.43631	1261.03	1811.23
ENSCAFG00000015210	#N/A	ENSCAFG00000015210	---	protein_coding	3.7135e-07	5.05777e-06	1.81731	0.861805	1.81731	848.819	467.074	0.00691354	0.071665	1.37622	0.460707	1.37622	642.795	467.074	0.0176348	0.0689258	0.757282	-0.401098	-1.32051	642.795	848.819
PLA2G7	phospholipase A2 group VII	PLA2G7	PLA2G7	protein_coding	4.57685e-09	9.19168e-08	0.615639	-0.699842	-1.62433	10618.8	17248.4	1.35411e-05	0.000485522	1.43278	0.518816	1.43278	24713.1	17248.4	1.82923e-24	1.70527e-22	2.3273	1.21866	2.3273	24713.1	10618.8
CHCHD4	coiled-coil-helix-coiled-coil-helix domain containing 4	CHCHD4	CHCHD4	protein_coding	0.000210221	0.0014032	1.8148	0.859812	1.8148	376.651	207.544	0.100609	0.383318	1.3051	0.384164	1.3051	270.866	207.544	0.039847	0.129413	0.719143	-0.475649	-1.39054	270.866	376.651
CRYBG1	crystallin beta-gamma domain containing 1	CRYBG1	CRYBG1	protein_coding	0.0576702	0.138379	0.720664	-0.472602	-1.38761	944.635	1310.79	0.00266189	0.0354841	1.67667	0.745599	1.67667	2197.76	1310.79	9.67823e-07	1.34337e-05	2.32657	1.2182	2.32657	2197.76	944.635
RHBDL1	rhomboid like 1	RHBDL1	RHBDL1	protein_coding	0.762714	0.857215	0.906267	-0.141991	-1.10343	29.8772	32.9673	0.0185164	0.140678	2.10772	1.07568	2.10772	69.4857	32.9673	0.00831009	0.0379244	2.32571	1.21767	2.32571	69.4857	29.8772
NCOA3	nuclear receptor coactivator 3	NCOA3	NCOA3	protein_coding	0.435551	0.598476	0.926454	-0.110209	-1.07938	2559.36	2762.54	4.1681e-15	8.09962e-13	2.15188	1.1056	2.15188	5944.65	2762.54	6.5699e-18	3.85723e-16	2.32271	1.21581	2.32271	5944.65	2559.36
ENSCAFG00000004703	#N/A	ENSCAFG00000004703	---	protein_coding	0.00127459	0.00640402	1.80873	0.854978	1.80873	249.27	137.815	0.239949	0.586773	1.24433	0.315367	1.24433	171.487	137.815	0.0417518	0.133785	0.687957	-0.53961	-1.45358	171.487	249.27
HYKK	hydroxylysine kinase	HYKK	HYKK	protein_coding	0.00697785	0.0262295	0.408135	-1.29288	-2.45017	37.1846	91.1085	0.865692	0.961206	0.946549	-0.0792515	-1.05647	86.2386	91.1085	0.0116537	0.0496366	2.3192	1.21363	2.3192	86.2386	37.1846
ENSCAFG00000048405	#N/A	ENSCAFG00000048405	---	protein_coding	8.84296e-07	1.09325e-05	0.269624	-1.89098	-3.70887	19.4264	72.0499	0.0580468	0.286025	0.624192	-0.679938	-1.60207	44.973	72.0499	0.00216314	0.0123992	2.31505	1.21104	2.31505	44.973	19.4264
LARGE1	LARGE xylosyl- and glucuronyltransferase 1	LARGE1	LARGE1	protein_coding	7.08936e-08	1.13735e-06	0.237118	-2.07632	-4.21731	155.059	653.93	0.023389	0.163383	0.548553	-0.866296	-1.82298	358.716	653.93	0.00175653	0.0104641	2.31342	1.21003	2.31342	358.716	155.059
BAZ1A	bromodomain adjacent to zinc finger domain 1A	BAZ1A	BAZ1A	protein_coding	0.000325174	0.00204207	1.8067	0.853353	1.8067	6978.93	3862.82	0.262809	0.613918	1.20246	0.265991	1.20246	4644.89	3862.82	0.0133589	0.0552332	0.665559	-0.587362	-1.5025	4644.89	6978.93
RAX2	retina and anterior neural fold homeobox 2	RAX2	RAX2	protein_coding	0.652533	0.775853	0.86992	-0.201046	-1.14953	25.9996	29.8874	0.0191052	0.143769	2.01113	1.00801	2.01113	60.1075	29.8874	0.00563889	0.0275885	2.31186	1.20905	2.31186	60.1075	25.9996
DOHH	deoxyhypusine hydroxylase	DOHH	DOHH	protein_coding	0.000114413	0.000833454	1.80636	0.853084	1.80636	891.876	493.742	0.0849292	0.351249	1.30357	0.382472	1.30357	643.629	493.742	0.033129	0.112526	0.721658	-0.470612	-1.3857	643.629	891.876
ATP11A	ATPase phospholipid transporting 11A	ATP11A	ATP11A	protein_coding	4.52462e-09	9.11331e-08	0.536374	-0.898688	-1.86437	1446.57	2696.93	0.0423829	0.237997	1.23914	0.309341	1.23914	3341.88	2696.93	3.19872e-15	1.51139e-13	2.31022	1.20803	2.31022	3341.88	1446.57
CRIP1	cysteine rich protein 1	CRIP1	CRIP1	protein_coding	0.00733604	0.0272818	0.661421	-0.59636	-1.5119	2361.12	3569.77	0.00624852	0.0670379	1.52334	0.607234	1.52334	5437.96	3569.77	6.19637e-08	1.08492e-06	2.30313	1.20359	2.30313	5437.96	2361.12
SH3KBP1	SH3 domain containing kinase binding protein 1	SH3KBP1	SH3KBP1	protein_coding	1.86193e-08	3.34492e-07	0.587569	-0.767171	-1.70193	3253.02	5536.4	0.0013408	0.0207854	1.35292	0.436081	1.35292	7490.33	5536.4	1.1097e-18	6.83504e-17	2.30258	1.20325	2.30258	7490.33	3253.02
FRY	FRY microtubule binding protein	FRY	FRY	protein_coding	1.04693e-14	5.02633e-13	0.119947	-3.05953	-8.33703	256.151	2135.53	2.41627e-06	0.00010617	0.276139	-1.85653	-3.62136	589.704	2135.53	0.002433	0.0136734	2.30218	1.203	2.30218	589.704	256.151
NECAB3	N-terminal EF-hand calcium binding protein 3	NECAB3	NECAB3	protein_coding	0.000202357	0.00135794	0.338659	-1.56209	-2.95282	28.0769	82.9061	0.373842	0.710919	0.779424	-0.359519	-1.283	64.619	82.9061	0.00467682	0.0235927	2.3015	1.20257	2.3015	64.619	28.0769
TAGAP	T cell activation RhoGTPase activating protein	TAGAP	TAGAP	protein_coding	3.86292e-40	1.48046e-37	3.74556	1.90518	3.74556	1885.87	503.495	3.98567e-27	2.74951e-24	2.93761	1.55464	2.93761	1479.07	503.495	0.0129035	0.0536882	0.784291	-0.350538	-1.27504	1479.07	1885.87
PPFIA4	PTPRF interacting protein alpha 4	PPFIA4	PPFIA4	protein_coding	9.74044e-08	1.49987e-06	0.368075	-1.44193	-2.71684	241.714	656.697	0.367584	0.705657	0.846107	-0.241087	-1.18188	555.636	656.697	9.50916e-06	0.000107276	2.29874	1.20084	2.29874	555.636	241.714
PGRMC1	progesterone receptor membrane component 1	PGRMC1	PGRMC1	protein_coding	0.00747752	0.0277034	0.729534	-0.454953	-1.37074	2353.61	3226.18	1.1775e-05	0.000430926	1.67396	0.743267	1.67396	5400.51	3226.18	1.78009e-12	6.03436e-11	2.29456	1.19822	2.29456	5400.51	2353.61
CENPW	centromere protein W	CENPW	CENPW	protein_coding	1.02096e-13	4.30772e-12	0.257783	-1.95577	-3.87923	71.9233	279.007	0.00261934	0.0350184	0.590049	-0.761093	-1.69477	164.628	279.007	7.84209e-06	9.06934e-05	2.28894	1.19468	2.28894	164.628	71.9233
HEXIM2	HEXIM P-TEFb complex subunit 2	HEXIM2	HEXIM2	protein_coding	0.000252272	0.00163743	0.425309	-1.23342	-2.35123	35.2231	82.8177	0.893028	0.971523	0.970518	-0.0431735	-1.03038	80.376	82.8177	0.000456684	0.00328512	2.28191	1.19024	2.28191	80.376	35.2231
AURKB	aurora kinase B	AURKB	AURKB	protein_coding	1.66467e-05	0.000150507	0.381177	-1.39147	-2.62346	85.5784	224.511	0.524206	0.813696	0.869639	-0.201511	-1.1499	195.244	224.511	0.000248672	0.00194057	2.28146	1.18996	2.28146	195.244	85.5784
IQCK	IQ motif containing K	IQCK	IQCK	protein_coding	0.0324919	0.08863	0.597191	-0.743735	-1.67451	37.9823	63.6016	0.181882	0.521575	1.36158	0.445282	1.36158	86.5987	63.6016	0.000590393	0.00413905	2.27997	1.18902	2.27997	86.5987	37.9823
RAB11FIP1	RAB11 family interacting protein 1	RAB11FIP1	RAB11FIP1	protein_coding	0.276542	0.438759	0.75068	-0.413729	-1.33213	390.195	519.788	0.0410817	0.233637	1.71018	0.774146	1.71018	888.93	519.788	0.00175987	0.010472	2.27817	1.18788	2.27817	888.93	390.195
WDR75	WD repeat domain 75	WDR75	WDR75	protein_coding	0.00294272	0.0128891	1.79655	0.845233	1.79655	815.903	454.149	0.280972	0.632361	1.23745	0.307372	1.23745	561.987	454.149	0.0583821	0.17241	0.688792	-0.537861	-1.45182	561.987	815.903
NOXA1	NADPH oxidase activator 1	NOXA1	NOXA1	protein_coding	0.00539978	0.0212981	0.486595	-1.03921	-2.0551	32.6055	67.0075	0.680376	0.890367	1.10765	0.147505	1.10765	74.221	67.0075	0.00153095	0.00932564	2.27633	1.18671	2.27633	74.221	32.6055
PNPLA8	patatin like phospholipase domain containing 8	PNPLA8	PNPLA8	protein_coding	0.111788	0.228156	0.847392	-0.238899	-1.18009	1680.16	1982.75	2.89293e-10	2.66092e-08	1.92199	0.942602	1.92199	3810.82	1982.75	3.1599e-15	1.49818e-13	2.26813	1.1815	2.26813	3810.82	1680.16
ATP5IF1	ATP synthase inhibitory factor subunit 1	ATP5IF1	ATP5IF1	protein_coding	1.37093e-06	1.63313e-05	1.7931	0.842453	1.7931	3956.93	2206.76	0.00525655	0.0594464	1.40191	0.487394	1.40191	3093.68	2206.76	0.0416712	0.133582	0.781838	-0.355059	-1.27904	3093.68	3956.93
TLE4	TLE family member 4, transcriptional corepressor	TLE4	TLE4	protein_coding	0.000183238	0.00124477	0.503946	-0.98866	-1.98434	709.129	1407.15	0.471457	0.778545	1.14044	0.189593	1.14044	1604.78	1407.15	8.28519e-06	9.50214e-05	2.26303	1.17825	2.26303	1604.78	709.129
CASTOR2	cytosolic arginine sensor for mTORC1 subunit 2	CASTOR2	CASTOR2	protein_coding	5.95293e-05	0.000467193	0.329076	-1.60351	-3.03881	36.8319	111.925	0.270266	0.621485	0.744135	-0.426364	-1.34384	83.2874	111.925	0.00354469	0.0187451	2.26128	1.17714	2.26128	83.2874	36.8319
POLR1A	RNA polymerase I subunit A	POLR1A	POLR1A	protein_coding	0.00100819	0.00525895	1.78981	0.839803	1.78981	1648.57	921.086	0.216146	0.563418	1.24526	0.316449	1.24526	1146.99	921.086	0.0404015	0.130666	0.695752	-0.523355	-1.43729	1146.99	1648.57
ANKRD2	ankyrin repeat domain 2	ANKRD2	ANKRD2	protein_coding	0.0019794	0.00925766	0.612697	-0.706755	-1.63213	421.878	688.559	0.0388456	0.22672	1.38324	0.468051	1.38324	952.442	688.559	2.63695e-07	4.08787e-06	2.25763	1.17481	2.25763	952.442	421.878
TFB2M	transcription factor B2, mitochondrial	TFB2M	TFB2M	protein_coding	9.7652e-06	9.4283e-05	1.78696	0.837509	1.78696	833.226	466.281	0.0268128	0.179319	1.33931	0.421488	1.33931	624.493	466.281	0.0277193	0.0980121	0.749489	-0.416021	-1.33424	624.493	833.226
SLC2A1	solute carrier family 2 member 1	SLC2A1	SLC2A1	protein_coding	0.000271523	0.0017473	0.468627	-1.09349	-2.13389	3099.11	6613.16	0.795856	0.936577	1.05529	0.0776439	1.05529	6978.83	6613.16	9.6476e-05	0.00083401	2.25188	1.17113	2.25188	6978.83	3099.11
PLCD3	phospholipase C delta 3	PLCD3	PLCD3	protein_coding	0.00101986	0.00530383	0.348805	-1.51951	-2.86693	71.5525	205.136	0.443861	0.76055	0.784626	-0.349924	-1.27449	160.955	205.136	0.0117701	0.0499975	2.24947	1.16958	2.24947	160.955	71.5525
CLEC4D	C-type lectin domain family 4 member D	CLEC4D	CLEC4D	protein_coding	1.60582e-18	1.24469e-16	0.108254	-3.20751	-9.23754	144.721	1336.86	1.68801e-08	1.20049e-06	0.243057	-2.04063	-4.11426	324.934	1336.86	0.00150719	0.00921341	2.24525	1.16688	2.24525	324.934	144.721
ENSCAFG00000005271	#N/A	ENSCAFG00000005271	---	protein_coding	0.00620068	0.0239035	0.703003	-0.508396	-1.42247	134.251	190.968	0.000224047	0.00494588	1.57789	0.657996	1.57789	301.326	190.968	2.10194e-10	5.51364e-09	2.2445	1.16639	2.2445	301.326	134.251
SRFBP1	serum response factor binding protein 1	SRFBP1	SRFBP1	protein_coding	0.000509271	0.00299889	1.78414	0.83523	1.78414	371.74	208.358	0.0328096	0.204183	1.42977	0.51578	1.42977	297.904	208.358	0.181815	0.376481	0.801375	-0.31945	-1.24785	297.904	371.74
DLA-79	#N/A	DLA-79	DLA-79	protein_coding	2.48315e-14	1.11961e-12	3.48522	1.80125	3.48522	19257	5525.35	1.06482e-10	1.06459e-08	2.87982	1.52598	2.87982	15912	5525.35	0.243702	0.4545	0.826296	-0.275269	-1.21022	15912	19257
POC1B	POC1 centriolar protein B	POC1B	POC1B	protein_coding	7.30634e-18	5.11703e-16	0.302953	-1.72284	-3.30084	146.347	483.068	0.00403675	0.0490677	0.679671	-0.557091	-1.4713	328.327	483.068	8.64102e-09	1.76101e-07	2.24349	1.16574	2.24349	328.327	146.347
CSRP1	cysteine and glycine rich protein 1	CSRP1	CSRP1	protein_coding	4.28189e-20	4.10258e-18	0.446217	-1.16418	-2.24106	1809.47	4055.13	0.985743	0.996207	0.998441	-0.00225125	-1.00156	4048.8	4055.13	5.4833e-20	3.7474e-18	2.23757	1.16193	2.23757	4048.8	1809.47
TREX1	three prime repair exonuclease 1	TREX1	TREX1	protein_coding	0.00749169	0.0277306	1.78259	0.833971	1.78259	714.031	400.559	0.450433	0.764481	1.17781	0.236113	1.17781	471.785	400.559	0.0552635	0.165596	0.660734	-0.597858	-1.51347	471.785	714.031
SH2D1B	SH2 domain containing 1B	SH2D1B	SH2D1B	protein_coding	0.387557	0.551819	0.774215	-0.369194	-1.29163	115.743	149.497	0.0613234	0.294699	1.73221	0.792616	1.73221	258.96	149.497	0.0063562	0.0304713	2.23738	1.16181	2.23738	258.96	115.743
DGKE	diacylglycerol kinase epsilon	DGKE	DGKE	protein_coding	0.129409	0.254593	0.723446	-0.467042	-1.38227	81.5605	112.739	0.0210715	0.153985	1.6173	0.693591	1.6173	182.333	112.739	0.000146014	0.00121725	2.23556	1.16063	2.23556	182.333	81.5605
FGD4	FYVE, RhoGEF and PH domain containing 4	FGD4	FGD4	protein_coding	5.24815e-10	1.2681e-08	0.401717	-1.31575	-2.48931	382.331	951.741	0.458706	0.769884	0.897961	-0.155275	-1.11363	854.626	951.741	4.62789e-08	8.32477e-07	2.23531	1.16047	2.23531	854.626	382.331
CDH24	cadherin 24	CDH24	CDH24	protein_coding	0.000182	0.00123819	0.319392	-1.6466	-3.13095	48.7566	152.655	0.258	0.608658	0.713026	-0.487973	-1.40247	108.847	152.655	0.00893079	0.0400709	2.23245	1.15863	2.23245	108.847	48.7566
ENSCAFG00000005880	#N/A	ENSCAFG00000005880	---	protein_coding	0.000489426	0.00290435	1.77795	0.830214	1.77795	2876.21	1617.71	0.0640998	0.30192	1.3578	0.441269	1.3578	2196.53	1617.71	0.102244	0.256976	0.763687	-0.388946	-1.30944	2196.53	2876.21
RASGRP3	RAS guanyl releasing protein 3	RASGRP3	RASGRP3	protein_coding	0.0182908	0.0563929	0.647568	-0.626897	-1.54424	445.623	688.148	0.0441876	0.243936	1.44545	0.531522	1.44545	994.686	688.148	1.27082e-05	0.000139598	2.23213	1.15842	2.23213	994.686	445.623
C15H16orf87	#N/A	C15H16orf87	C15H16orf87	protein_coding	3.82485e-05	0.000316755	0.635359	-0.654357	-1.57391	184.807	290.87	0.000990029	0.0164571	1.4168	0.50264	1.4168	412.106	290.87	2.29724e-13	8.75555e-12	2.22993	1.157	2.22993	412.106	184.807
PRKAR2B	protein kinase cAMP-dependent type II regulatory subunit beta	PRKAR2B	PRKAR2B	protein_coding	1.00837e-05	9.6951e-05	0.312184	-1.67953	-3.20324	284.569	911.544	0.166953	0.499059	0.695742	-0.523375	-1.43731	634.2	911.544	0.00241123	0.0135787	2.22863	1.15616	2.22863	634.2	284.569
WDR46	WD repeat domain 46	WDR46	WDR46	protein_coding	0.00137459	0.00683432	1.77505	0.827861	1.77505	1024.74	577.299	0.127266	0.434165	1.31535	0.395447	1.31535	759.351	577.299	0.0943939	0.244023	0.741021	-0.432414	-1.34949	759.351	1024.74
ENDOV	endonuclease V	ENDOV	ENDOV	protein_coding	6.47023e-10	1.52598e-08	0.390349	-1.35716	-2.56181	164.324	420.968	0.346901	0.688966	0.869446	-0.201831	-1.15016	366.009	420.968	1.70184e-07	2.74623e-06	2.22736	1.15533	2.22736	366.009	164.324
ENSCAFG00000041383	#N/A	ENSCAFG00000041383	---	protein_coding	0.000179856	0.00122886	0.507448	-0.978668	-1.97065	3091.52	6092.29	0.50131	0.798311	1.12938	0.175532	1.12938	6880.52	6092.29	9.99364e-06	0.000111917	2.22561	1.1542	2.22561	6880.52	3091.52
CALML6	calmodulin like 6	CALML6	CALML6	protein_coding	8.62029e-15	4.19087e-13	0.23125	-2.11247	-4.32432	49.8532	215.581	0.000209695	0.00468674	0.514516	-0.958711	-1.94357	110.92	215.581	3.60803e-05	0.000348843	2.22493	1.15376	2.22493	110.92	49.8532
TRAF3IP3	TRAF3 interacting protein 3	TRAF3IP3	TRAF3IP3	protein_coding	2.6677e-08	4.60654e-07	0.41689	-1.26226	-2.39871	860.209	2063.39	0.628636	0.869013	0.927034	-0.109305	-1.07871	1912.84	2063.39	3.85579e-07	5.76989e-06	2.22369	1.15295	2.22369	1912.84	860.209
MMP12	matrix metallopeptidase 12	MMP12	MMP12	protein_coding	0.0255682	0.0732485	0.616227	-0.698466	-1.62278	182491	296143	0.148094	0.469788	1.36835	0.452443	1.36835	405229	296143	0.000234236	0.00184461	2.22054	1.15091	2.22054	405229	182491
ENSCAFG00000006373	#N/A	ENSCAFG00000006373	---	protein_coding	2.99935e-07	4.15482e-06	0.262729	-1.92835	-3.80621	162.507	618.534	0.0369487	0.219828	0.582756	-0.779035	-1.71598	360.454	618.534	0.00234873	0.0132755	2.21809	1.14932	2.21809	360.454	162.507
ENSCAFG00000044026	#N/A	ENSCAFG00000044026	---	protein_coding	1.77012e-06	2.04201e-05	1.76864	0.82264	1.76864	2031.87	1148.83	0.0204316	0.150937	1.31967	0.400173	1.31967	1516.08	1148.83	0.0140507	0.0574053	0.746148	-0.422466	-1.34022	1516.08	2031.87
PECAM1	platelet and endothelial cell adhesion molecule 1	PECAM1	PECAM1	protein_coding	3.71355e-06	3.97485e-05	0.307111	-1.70317	-3.25615	34.2147	111.408	0.11646	0.413024	0.680674	-0.554964	-1.46913	75.8327	111.408	0.00213259	0.0122802	2.21638	1.1482	2.21638	75.8327	34.2147
ENSCAFG00000004578	#N/A	ENSCAFG00000004578	---	protein_coding	0.000125051	0.000899544	0.416966	-1.262	-2.39828	30.9475	74.2207	0.708768	0.904134	0.922679	-0.1161	-1.0838	68.4818	74.2207	0.00057336	0.00402988	2.21284	1.1459	2.21284	68.4818	30.9475
APOBR	apolipoprotein B receptor	APOBR	APOBR	protein_coding	3.56092e-12	1.17818e-10	0.291066	-1.78058	-3.43564	3366.91	11567.5	0.0130253	0.111207	0.643831	-0.635247	-1.5532	7447.51	11567.5	7.76703e-06	9.01276e-05	2.21197	1.14533	2.21197	7447.51	3366.91
FBL	fibrillarin	FBL	FBL	protein_coding	0.0113723	0.0387418	1.76416	0.81898	1.76416	2335.17	1323.67	0.19634	0.540377	1.33638	0.418325	1.33638	1768.92	1323.67	0.215522	0.419935	0.757514	-0.400655	-1.32011	1768.92	2335.17
CCDC17	coiled-coil domain containing 17	CCDC17	CCDC17	protein_coding	0.000306541	0.00193918	1.76358	0.818509	1.76358	1327.27	752.601	0.144011	0.464464	1.25889	0.332155	1.25889	947.444	752.601	0.0318921	0.109071	0.713827	-0.486354	-1.4009	947.444	1327.27
ENSCAFG00000002706	#N/A	ENSCAFG00000002706	---	protein_coding	0.00419197	0.0172753	1.76156	0.816855	1.76156	542.828	308.152	0.194124	0.538152	1.29397	0.371807	1.29397	398.74	308.152	0.1184	0.284989	0.73456	-0.445048	-1.36136	398.74	542.828
PRKAB2	protein kinase AMP-activated non-catalytic subunit beta 2	PRKAB2	PRKAB2	protein_coding	4.85245e-05	0.00038992	1.76086	0.816276	1.76086	1844.75	1047.65	0.10176	0.386135	1.25664	0.329573	1.25664	1316.51	1047.65	0.015383	0.0618231	0.713654	-0.486704	-1.40124	1316.51	1844.75
RRN3	RRN3 homolog, RNA polymerase I transcription factor	RRN3	RRN3	protein_coding	0.00365367	0.0153876	1.76006	0.815628	1.76006	906.9	515.265	0.185266	0.526352	1.29467	0.372581	1.29467	667.097	515.265	0.114152	0.278015	0.73558	-0.443047	-1.35947	667.097	906.9
SDC2	syndecan 2	SDC2	SDC2	protein_coding	3.85968e-12	1.27397e-10	0.368934	-1.43856	-2.71051	6191.86	16783.1	0.155632	0.480395	0.815637	-0.294002	-1.22604	13688.9	16783.1	3.34147e-08	6.15518e-07	2.21079	1.14456	2.21079	13688.9	6191.86
ENSCAFG00000030667	#N/A	ENSCAFG00000030667	---	protein_coding	0.00293711	0.0128727	1.75884	0.814627	1.75884	81.2149	46.1752	0.0564664	0.28115	1.44546	0.53153	1.44546	66.7444	46.1752	0.293309	0.511247	0.821825	-0.283097	-1.2168	66.7444	81.2149
ATP5PB	ATP synthase peripheral stalk-membrane subunit b	ATP5PB	ATP5PB	protein_coding	3.19822e-06	3.50205e-05	1.75813	0.814042	1.75813	3927.68	2234.01	0.00647909	0.0686574	1.39119	0.476317	1.39119	3107.93	2234.01	0.0531538	0.160896	0.791288	-0.337725	-1.26376	3107.93	3927.68
FAR2	fatty acyl-CoA reductase 2	FAR2	FAR2	protein_coding	0.0197545	0.0597703	0.503378	-0.990286	-1.98658	12.6706	25.1711	0.698752	0.900172	1.11032	0.150974	1.11032	27.9479	25.1711	0.00750144	0.0348946	2.20574	1.14126	2.20574	27.9479	12.6706
WDR43	WD repeat domain 43	WDR43	WDR43	protein_coding	3.79913e-05	0.000315193	1.75772	0.813707	1.75772	1286.68	732.016	0.0548496	0.27664	1.30177	0.380478	1.30177	952.919	732.016	0.0281481	0.0989701	0.740602	-0.433229	-1.35025	952.919	1286.68
TRAP1	TNF receptor associated protein 1	TRAP1	TRAP1	protein_coding	0.00142498	0.00703921	1.75766	0.813655	1.75766	1552.55	883.308	0.0504217	0.264003	1.41388	0.49966	1.41388	1248.89	883.308	0.217977	0.423038	0.804411	-0.313995	-1.24315	1248.89	1552.55
ATP5F1A	ATP synthase F1 subunit alpha	ATP5F1A	ATP5F1A	protein_coding	9.17566e-06	8.94043e-05	1.75737	0.813419	1.75737	15135.9	8612.8	0.017886	0.137637	1.35129	0.434341	1.35129	11638.4	8612.8	0.038685	0.126666	0.768929	-0.379078	-1.30051	11638.4	15135.9
RRP12	ribosomal RNA processing 12 homolog	RRP12	RRP12	protein_coding	0.000296467	0.00188931	1.75725	0.813316	1.75725	1358.37	773.011	0.235838	0.582711	1.2035	0.267239	1.2035	930.32	773.011	0.0151167	0.0610195	0.68488	-0.546077	-1.46011	930.32	1358.37
EMC9	ER membrane protein complex subunit 9	EMC9	EMC9	protein_coding	0.00351235	0.0148878	0.635082	-0.654984	-1.5746	78.6375	123.823	0.0239738	0.165798	1.39781	0.483171	1.39781	173.081	123.823	3.21601e-07	4.88133e-06	2.20099	1.13816	2.20099	173.081	78.6375
MTX1	metaxin 1	MTX1	MTX1	protein_coding	8.0386e-06	7.9277e-05	1.75546	0.811851	1.75546	867.066	493.925	0.0385096	0.226035	1.29993	0.378429	1.29993	642.065	493.925	0.0169851	0.0668408	0.740503	-0.433422	-1.35043	642.065	867.066
LIPA	lipase A, lysosomal acid type	LIPA	LIPA	protein_coding	1.34417e-05	0.00012455	0.633153	-0.659373	-1.5794	13921.8	21988	0.00163628	0.0245388	1.39165	0.476797	1.39165	30599.6	21988	6.3687e-14	2.58438e-12	2.19797	1.13617	2.19797	30599.6	13921.8
DOCK9	dedicator of cytokinesis 9	DOCK9	DOCK9	protein_coding	0.015345	0.0491105	2.20857	1.14311	2.20857	70.3628	31.8589	0.00131048	0.0204302	2.84791	1.5099	2.84791	90.7313	31.8589	0.424396	0.635784	1.28948	0.366788	1.28948	90.7313	70.3628
ENSCAFG00000001388	#N/A	ENSCAFG00000001388	---	protein_coding	0.00224853	0.0103169	1.75257	0.809471	1.75257	206.069	117.581	0.149797	0.471234	1.30647	0.385679	1.30647	153.617	117.581	0.108516	0.267991	0.745462	-0.423792	-1.34145	153.617	206.069
RRP15	ribosomal RNA processing 15 homolog	RRP15	RRP15	protein_coding	2.05732e-06	2.34585e-05	1.75218	0.809148	1.75218	600.979	342.99	0.00657403	0.0691957	1.38182	0.466567	1.38182	473.95	342.99	0.0434988	0.138444	0.788629	-0.342582	-1.26802	473.95	600.979
CCDC62	coiled-coil domain containing 62	CCDC62	CCDC62	protein_coding	0.00102906	0.00533558	0.40687	-1.29736	-2.45779	54.5553	134.085	0.670131	0.886246	0.892051	-0.164802	-1.12101	119.611	134.085	0.00436039	0.0223146	2.19247	1.13256	2.19247	119.611	54.5553
FNDC3B	fibronectin type III domain containing 3B	FNDC3B	FNDC3B	protein_coding	4.9447e-13	1.82901e-11	0.370854	-1.43108	-2.69648	4747.63	12801.9	0.130468	0.439468	0.812737	-0.299139	-1.23041	10404.6	12801.9	1.09867e-08	2.20325e-07	2.19153	1.13194	2.19153	10404.6	4747.63
P2RX4	purinergic receptor P2X 4	P2RX4	P2RX4	protein_coding	5.71951e-10	1.37477e-08	0.43617	-1.19704	-2.29269	3359.7	7702.73	0.720264	0.907947	0.95326	-0.0690578	-1.04903	7342.71	7702.73	5.25756e-09	1.11085e-07	2.18553	1.12798	2.18553	7342.71	3359.7
DHX37	DEAH-box helicase 37	DHX37	DHX37	protein_coding	0.00241982	0.0109643	1.7482	0.805869	1.7482	1345.29	769.529	0.049076	0.259803	1.43739	0.523449	1.43739	1106.11	769.529	0.287308	0.504838	0.822211	-0.28242	-1.21623	1106.11	1345.29
CELSR3	cadherin EGF LAG seven-pass G-type receptor 3	CELSR3	CELSR3	protein_coding	3.86644e-10	9.54297e-09	0.358429	-1.48024	-2.78995	50.8238	141.796	0.109719	0.400007	0.782509	-0.353821	-1.27794	110.957	141.796	3.04854e-06	3.83067e-05	2.18316	1.12642	2.18316	110.957	50.8238
PRPS1	phosphoribosyl pyrophosphate synthetase 1	PRPS1	PRPS1	protein_coding	0.00253035	0.0113676	1.74691	0.804807	1.74691	793.211	454.065	0.167062	0.499232	1.29173	0.369303	1.29173	586.528	454.065	0.102002	0.256617	0.739436	-0.435504	-1.35238	586.528	793.211
CYP46A1	cytochrome P450 family 46 subfamily A member 1	CYP46A1	CYP46A1	protein_coding	8.79206e-06	8.59094e-05	0.406841	-1.29746	-2.45796	1031.87	2536.3	0.555323	0.831753	0.887731	-0.171806	-1.12647	2251.55	2536.3	0.00011601	0.000991688	2.18201	1.12566	2.18201	2251.55	1031.87
COQ10B	coenzyme Q10B	COQ10B	COQ10B	protein_coding	0.000446499	0.00269599	1.7435	0.801985	1.7435	1728.54	991.419	0.0454624	0.248562	1.37324	0.45758	1.37324	1361.45	991.419	0.13131	0.305346	0.787633	-0.344404	-1.26963	1361.45	1728.54
FARSA	phenylalanyl-tRNA synthetase subunit alpha	FARSA	FARSA	protein_coding	0.000121876	0.000879888	1.74238	0.801059	1.74238	1569.25	900.636	0.0322806	0.201917	1.3634	0.447209	1.3634	1227.93	900.636	0.0893247	0.234477	0.782494	-0.353849	-1.27797	1227.93	1569.25
MRPS35	mitochondrial ribosomal protein S35	MRPS35	MRPS35	protein_coding	4.34873e-05	0.000353353	1.74205	0.800786	1.74205	533.368	306.173	0.0893279	0.361213	1.26187	0.335562	1.26187	386.35	306.173	0.0173849	0.068081	0.724359	-0.465223	-1.38053	386.35	533.368
EVI2B	ecotropic viral integration site 2B	EVI2B	EVI2B	protein_coding	2.88494e-19	2.41233e-17	0.412777	-1.27657	-2.42262	1792.4	4342.31	0.282791	0.634564	0.899985	-0.152027	-1.11113	3908.02	4342.31	2.89565e-15	1.3872e-13	2.18032	1.12454	2.18032	3908.02	1792.4
UGP2	UDP-glucose pyrophosphorylase 2	UGP2	UGP2	protein_coding	0.11267	0.229447	0.788599	-0.342637	-1.26807	2471.47	3134	0.000294028	0.00620291	1.71813	0.780836	1.71813	5384.62	3134	1.9459e-07	3.10018e-06	2.17871	1.12347	2.17871	5384.62	2471.47
TIMMDC1	translocase of inner mitochondrial membrane domain containing 1	TIMMDC1	TIMMDC1	protein_coding	0.000302502	0.00191979	1.73848	0.797826	1.73848	842.877	484.836	0.208671	0.554014	1.21327	0.2789	1.21327	588.236	484.836	0.0187465	0.0722965	0.697891	-0.518926	-1.43289	588.236	842.877
AKAP7	A-kinase anchoring protein 7	AKAP7	AKAP7	protein_coding	0.0199889	0.0603265	0.556702	-0.845024	-1.79629	355.031	637.741	0.446623	0.762348	1.21031	0.275375	1.21031	771.863	637.741	0.00203686	0.0118028	2.17407	1.1204	2.17407	771.863	355.031
ABHD1	abhydrolase domain containing 1	ABHD1	ABHD1	protein_coding	0.0383866	0.100478	0.537095	-0.896752	-1.86187	194.272	361.709	0.60596	0.858978	1.1666	0.22231	1.1666	421.97	361.709	0.0097749	0.0431152	2.17206	1.11906	2.17206	421.97	194.272
APBB3	amyloid beta precursor protein binding family B member 3	APBB3	APBB3	protein_coding	0.0119685	0.0404234	0.592757	-0.754487	-1.68703	219.253	369.888	0.22186	0.568773	1.28651	0.363464	1.28651	475.865	369.888	0.00019449	0.00156922	2.17039	1.11795	2.17039	475.865	219.253
SVIL	supervillin	SVIL	SVIL	protein_coding	1.38452e-09	3.081e-08	0.380116	-1.39549	-2.63077	383.166	1008.02	0.221347	0.568066	0.824007	-0.279272	-1.21358	830.618	1008.02	1.3501e-06	1.812e-05	2.16777	1.11621	2.16777	830.618	383.166
ENSCAFG00000025112	#N/A	ENSCAFG00000025112	---	protein_coding	0.000749524	0.00411017	1.73219	0.792595	1.73219	1185.78	684.556	0.0995994	0.381503	1.30867	0.388106	1.30867	895.861	684.556	0.0851632	0.226615	0.755504	-0.404489	-1.32362	895.861	1185.78
SLAMF1	signaling lymphocytic activation molecule family member 1	SLAMF1	SLAMF1	protein_coding	0.0572915	0.137829	1.76376	0.818654	1.76376	428.415	242.899	7.09249e-06	0.000282003	3.80976	1.9297	3.80976	925.385	242.899	0.00952601	0.0422198	2.16002	1.11105	2.16002	925.385	428.415
THY1	Thy-1 cell surface antigen	THY1	THY1	protein_coding	0.0304266	0.084077	2.04588	1.03272	2.04588	147.68	72.1838	0.00162934	0.0244614	2.82805	1.49981	2.82805	204.14	72.1838	0.322157	0.539811	1.38231	0.467085	1.38231	204.14	147.68
AP4M1	adaptor related protein complex 4 subunit mu 1	AP4M1	AP4M1	protein_coding	5.48133e-06	5.62274e-05	0.417761	-1.25925	-2.39371	152.833	365.838	0.582131	0.847703	0.901161	-0.150144	-1.10968	329.679	365.838	6.64122e-05	0.000598882	2.15712	1.10911	2.15712	329.679	152.833
FGD1	FYVE, RhoGEF and PH domain containing 1	FGD1	FGD1	protein_coding	0.952298	0.972312	1.00996	0.0142911	1.00996	201.307	199.323	1.85329e-06	8.38355e-05	2.17623	1.12183	2.17623	433.773	199.323	2.66618e-06	3.38723e-05	2.15478	1.10754	2.15478	433.773	201.307
GAS6	growth arrest specific 6	GAS6	GAS6	protein_coding	2.49057e-05	0.000215844	0.291651	-1.77768	-3.42875	15.6243	53.5718	0.0881591	0.359436	0.627528	-0.672248	-1.59355	33.6178	53.5718	0.0108683	0.0468886	2.15164	1.10543	2.15164	33.6178	15.6243
CBX6	chromobox 6	CBX6	CBX6	protein_coding	0.00115517	0.00587899	0.423718	-1.23883	-2.36006	228.939	540.311	0.718479	0.907689	0.909599	-0.136697	-1.09939	491.466	540.311	0.00388383	0.0202514	2.14671	1.10213	2.14671	491.466	228.939
FTSJ3	FtsJ RNA 2'-O-methyltransferase 3	FTSJ3	FTSJ3	protein_coding	0.00148212	0.00726939	1.72391	0.785681	1.72391	926.118	537.221	0.189247	0.532214	1.25311	0.325515	1.25311	673.198	537.221	0.0625695	0.181818	0.726902	-0.460166	-1.3757	673.198	926.118
LRRC59	leucine rich repeat containing 59	LRRC59	LRRC59	protein_coding	0.000794034	0.00430802	1.72376	0.785558	1.72376	4872.86	2826.88	0.34563	0.688026	1.16554	0.221	1.16554	3294.84	2826.88	0.0159116	0.063522	0.676162	-0.564558	-1.47893	3294.84	4872.86
RNF144A	ring finger protein 144A	RNF144A	RNF144A	protein_coding	0.00050755	0.00299131	0.466954	-1.09865	-2.14154	843.884	1807.21	0.995848	0.998496	1.00114	0.00164094	1.00114	1809.27	1807.21	0.000500064	0.00355455	2.14398	1.10029	2.14398	1809.27	843.884
TRIM7	tripartite motif containing 7	TRIM7	TRIM7	protein_coding	0.0201843	0.060751	0.536146	-0.899302	-1.86516	81.4549	151.927	0.599758	0.856345	1.14889	0.200235	1.14889	174.546	151.927	0.00453362	0.022988	2.14286	1.09954	2.14286	174.546	81.4549
ESPL1	extra spindle pole bodies like 1, separase	ESPL1	ESPL1	protein_coding	0.00297011	0.0129967	0.411258	-1.28189	-2.43157	97.1717	236.279	0.669211	0.885839	0.881137	-0.182562	-1.1349	208.194	236.279	0.0110485	0.0474333	2.14254	1.09932	2.14254	208.194	97.1717
IGSF8	immunoglobulin superfamily member 8	IGSF8	IGSF8	protein_coding	0.919722	0.954851	0.982771	-0.025073	-1.01753	2946.17	2997.82	1.55571e-05	0.000548956	2.10515	1.07392	2.10515	6310.85	2997.82	9.84538e-06	0.000110616	2.14205	1.09899	2.14205	6310.85	2946.17
C18H7orf57	#N/A	C18H7orf57	C18H7orf57	protein_coding	3.3721e-18	2.46163e-16	0.294776	-1.76231	-3.39241	186.716	633.417	0.00073961	0.013201	0.629408	-0.667932	-1.58879	398.678	633.417	9.10003e-08	1.53114e-06	2.13521	1.09438	2.13521	398.678	186.716
UQCR10	ubiquinol-cytochrome c reductase, complex III subunit X	UQCR10	UQCR10	protein_coding	6.19797e-06	6.26472e-05	1.71501	0.778221	1.71501	1267.77	739.216	0.0172189	0.134829	1.3302	0.411646	1.3302	983.307	739.216	0.0330034	0.112155	0.775622	-0.366575	-1.28929	983.307	1267.77
EDARADD	EDAR associated death domain	EDARADD	EDARADD	protein_coding	0.112716	0.229468	0.654735	-0.611017	-1.52734	29.064	44.3905	0.195694	0.540088	1.39288	0.478076	1.39288	61.8308	44.3905	0.00441561	0.0225054	2.1274	1.08909	2.1274	61.8308	29.064
PARP3	poly(ADP-ribose) polymerase family member 3	PARP3	PARP3	protein_coding	5.12812e-05	0.000408267	0.400885	-1.31874	-2.49448	238.445	594.797	0.467668	0.775239	0.849756	-0.234879	-1.17681	505.433	594.797	0.000894959	0.00587988	2.1197	1.08386	2.1197	505.433	238.445
CCT2	chaperonin containing TCP1 subunit 2	CCT2	CCT2	protein_coding	0.00072822	0.00401088	1.71391	0.77729	1.71391	2829.05	1650.64	0.0873941	0.357373	1.31367	0.393604	1.31367	2168.4	1650.64	0.0952416	0.245433	0.766476	-0.383687	-1.30467	2168.4	2829.05
TAF1B	TATA-box binding protein associated factor, RNA polymerase I subunit B	TAF1B	TAF1B	protein_coding	0.00478698	0.0192412	1.71337	0.776833	1.71337	260.372	151.965	0.0265021	0.178105	1.5297	0.613248	1.5297	232.461	151.965	0.550072	0.737441	0.892804	-0.163584	-1.12007	232.461	260.372
FNBP1L	formin binding protein 1 like	FNBP1L	FNBP1L	protein_coding	0.0178488	0.0553268	0.514092	-0.959901	-1.94518	29.0629	56.5324	0.754825	0.922007	1.08817	0.121906	1.08817	61.517	56.5324	0.00779542	0.035935	2.11669	1.08181	2.11669	61.517	29.0629
ENSCAFG00000031378	#N/A	ENSCAFG00000031378	---	protein_coding	0.000434944	0.00263083	0.523275	-0.934357	-1.91104	980.109	1873.03	0.581441	0.847441	1.10654	0.146051	1.10654	2072.57	1873.03	4.76319e-05	0.000446967	2.11464	1.08041	2.11464	2072.57	980.109
ICAM1	intercellular adhesion molecule 1	ICAM1	ICAM1	protein_coding	2.83782e-06	3.14991e-05	2.74782	1.45829	2.74782	24495.1	8914.37	1.71138e-06	7.8445e-05	2.8094	1.49026	2.8094	25044	8914.37	0.918216	0.959624	1.02241	0.0319717	1.02241	25044	24495.1
MRPL34	mitochondrial ribosomal protein L34	MRPL34	MRPL34	protein_coding	0.00235802	0.0107371	1.71039	0.774327	1.71039	166.006	97.0571	0.105204	0.392243	1.33569	0.417585	1.33569	129.638	97.0571	0.158935	0.344781	0.780926	-0.356741	-1.28053	129.638	166.006
CALCOCO1	calcium binding and coiled-coil domain 1	CALCOCO1	CALCOCO1	protein_coding	0.000518449	0.00303609	0.384014	-1.38077	-2.60407	616.026	1604.17	0.448548	0.764083	0.811732	-0.300925	-1.23193	1302.16	1604.17	0.00666825	0.0316484	2.11381	1.07984	2.11381	1302.16	616.026
COX5B	cytochrome c oxidase subunit 5B	COX5B	COX5B	protein_coding	9.43587e-06	9.15519e-05	1.71029	0.774244	1.71029	4025.68	2353.8	0.0521413	0.268746	1.26563	0.339859	1.26563	2979.04	2353.8	0.0129214	0.0537141	0.740009	-0.434386	-1.35134	2979.04	4025.68
LYZ	lysozyme	LYZ	LYZ	protein_coding	3.82676e-08	6.37654e-07	0.259419	-1.94665	-3.85477	16854.5	64970.4	0.014252	0.118028	0.548085	-0.86753	-1.82454	35609.3	64970.4	0.00230229	0.0130694	2.11274	1.07912	2.11274	35609.3	16854.5
IL2RG	interleukin 2 receptor subunit gamma	IL2RG	IL2RG	protein_coding	0.504117	0.659445	0.857087	-0.222486	-1.16674	5179.47	6043.11	0.0103027	0.0943244	1.80775	0.854197	1.80775	10924.4	6043.11	0.00122397	0.00770077	2.10918	1.07668	2.10918	10924.4	5179.47
SERHL2	serine hydrolase like 2	SERHL2	SERHL2	protein_coding	0.00199216	0.0093109	1.7065	0.771039	1.7065	230.476	135.058	0.267158	0.617831	1.21437	0.280212	1.21437	164.011	135.058	0.0489303	0.150993	0.711617	-0.490827	-1.40525	164.011	230.476
KIAA0513	KIAA0513	KIAA0513	KIAA0513	protein_coding	8.80992e-08	1.3719e-06	0.30202	-1.72729	-3.31104	1056.17	3497.02	0.0433803	0.241334	0.636767	-0.651163	-1.57043	2226.79	3497.02	0.00086682	0.00572499	2.10836	1.07612	2.10836	2226.79	1056.17
ENSCAFG00000002833	#N/A	ENSCAFG00000002833	---	protein_coding	0.00314444	0.0136342	1.70508	0.769838	1.70508	165.024	96.7837	0.104224	0.390754	1.34566	0.428316	1.34566	130.238	96.7837	0.187708	0.383694	0.789208	-0.341522	-1.26709	130.238	165.024
SLC9A5	solute carrier family 9 member A5	SLC9A5	SLC9A5	protein_coding	2.95383e-10	7.42331e-09	0.338845	-1.5613	-2.9512	47.822	141.132	0.0368705	0.219534	0.713987	-0.48603	-1.40059	100.767	141.132	2.25507e-05	0.000231153	2.10712	1.07527	2.10712	100.767	47.822
TTC16	tetratricopeptide repeat domain 16	TTC16	TTC16	protein_coding	3.23213e-05	0.000273213	0.488362	-1.03398	-2.04766	56.6191	115.937	0.862174	0.960193	1.02884	0.0410224	1.02884	119.281	115.937	1.77346e-05	0.000186925	2.10672	1.075	2.10672	119.281	56.6191
LRRC8A	leucine rich repeat containing 8 VRAC subunit A	LRRC8A	LRRC8A	protein_coding	0.504323	0.659602	0.9222	-0.116849	-1.08436	632.285	685.627	3.37418e-08	2.22744e-06	1.94215	0.957658	1.94215	1331.59	685.627	6.60774e-10	1.62798e-08	2.106	1.07451	2.106	1331.59	632.285
ENSCAFG00000049310	#N/A	ENSCAFG00000049310	---	protein_coding	0.52288	0.67368	1.10885	0.149069	1.10885	360.649	325.245	1.22542e-07	7.07411e-06	2.33507	1.22346	2.33507	759.469	325.245	3.39641e-06	4.23309e-05	2.10584	1.07439	2.10584	759.469	360.649
HK2	hexokinase 2	HK2	HK2	protein_coding	1.10489e-09	2.48276e-08	5.27305	2.39864	5.27305	4385.23	831.631	0.000166315	0.0039292	2.79511	1.48291	2.79511	2324.5	831.631	0.0198185	0.0754374	0.530076	-0.91573	-1.88652	2324.5	4385.23
MMP9	matrix metallopeptidase 9	MMP9	MMP9	protein_coding	0.160444	0.297853	0.672994	-0.571335	-1.4859	176164	261762	0.216616	0.563525	1.4171	0.502944	1.4171	370943	261762	0.00831221	0.0379244	2.10567	1.07428	2.10567	370943	176164
TMEM63A	transmembrane protein 63A	TMEM63A	TMEM63A	protein_coding	9.62769e-10	2.18476e-08	0.349695	-1.51583	-2.85963	1551.38	4436.38	0.0721744	0.321416	0.734668	-0.444835	-1.36116	3259.27	4436.38	1.57558e-05	0.000168645	2.10088	1.07099	2.10088	3259.27	1551.38
TRIP6	thyroid hormone receptor interactor 6	TRIP6	TRIP6	protein_coding	0.000470217	0.00280527	0.499221	-1.00225	-2.00312	40.4821	81.0905	0.81074	0.942912	1.0461	0.0650209	1.0461	84.8288	81.0905	0.000215686	0.00172013	2.09547	1.06727	2.09547	84.8288	40.4821
FCHSD2	FCH and double SH3 domains 2	FCHSD2	FCHSD2	protein_coding	0.817802	0.891533	0.962079	-0.0557724	-1.03942	1150.51	1195.86	2.90924e-05	0.000943289	2.0133	1.00956	2.0133	2407.62	1195.86	1.04174e-05	0.000116191	2.09266	1.06534	2.09266	2407.62	1150.51
ABCE1	ATP binding cassette subfamily E member 1	ABCE1	ABCE1	protein_coding	0.00022765	0.00149709	1.70048	0.765942	1.70048	1784.25	1049.26	0.0360378	0.217219	1.35316	0.436329	1.35316	1419.81	1049.26	0.112375	0.275046	0.79575	-0.329613	-1.25668	1419.81	1784.25
SCIMP	SLP adaptor and CSK interacting membrane protein	SCIMP	SCIMP	protein_coding	0.00345891	0.0146974	2.03783	1.02703	2.03783	1848.19	906.941	2.51368e-05	0.000837711	2.78888	1.47969	2.78888	2529.35	906.941	0.196807	0.395499	1.36856	0.452655	1.36856	2529.35	1848.19
LIX1L	limb and CNS expressed 1 like	LIX1L	LIX1L	protein_coding	0.00202385	0.00943985	0.627795	-0.671634	-1.59288	247.813	394.735	0.0668517	0.308892	1.31308	0.392954	1.31308	518.318	394.735	9.59268e-07	1.33418e-05	2.09157	1.06459	2.09157	518.318	247.813
ENSCAFG00000012982	#N/A	ENSCAFG00000012982	---	protein_coding	0.598635	0.734694	0.916281	-0.126139	-1.09137	195.746	213.632	7.0576e-05	0.00197113	1.91583	0.937972	1.91583	409.282	213.632	7.33046e-06	8.57832e-05	2.09088	1.06411	2.09088	409.282	195.746
ENSCAFG00000012196	#N/A	ENSCAFG00000012196	---	protein_coding	0.00791013	0.0290025	1.69884	0.764552	1.69884	134.591	79.2251	0.206613	0.551914	1.29083	0.368294	1.29083	102.266	79.2251	0.167092	0.356317	0.759826	-0.396259	-1.31609	102.266	134.591
ARG2	arginase 2	ARG2	ARG2	protein_coding	3.67843e-10	9.13297e-09	0.366177	-1.44939	-2.73092	534.214	1458.9	0.0934026	0.369566	0.765429	-0.385659	-1.30646	1116.68	1458.9	4.44966e-06	5.42332e-05	2.09033	1.06373	2.09033	1116.68	534.214
ZFHX2	zinc finger homeobox 2	ZFHX2	ZFHX2	protein_coding	0.274812	0.436916	0.834343	-0.261288	-1.19855	83.7889	100.425	0.000518049	0.00979113	1.74195	0.800701	1.74195	174.935	100.425	6.25876e-06	7.41219e-05	2.08781	1.06199	2.08781	174.935	83.7889
NAA15	N-alpha-acetyltransferase 15, NatA auxiliary subunit	NAA15	NAA15	protein_coding	0.000574425	0.0033049	1.69715	0.763118	1.69715	1514.89	892.608	0.0495593	0.26138	1.35278	0.435922	1.35278	1207.5	892.608	0.1395	0.317395	0.797084	-0.327196	-1.25457	1207.5	1514.89
BRCA2	BRCA2 DNA repair associated	BRCA2	BRCA2	protein_coding	6.50887e-07	8.31509e-06	0.484208	-1.0463	-2.06523	104.736	216.304	0.939919	0.983248	1.01063	0.0152586	1.01063	218.604	216.304	5.2176e-07	7.6177e-06	2.08718	1.06156	2.08718	218.604	104.736
CPA1	carboxypeptidase A1	CPA1	CPA1	protein_coding	3.13084e-05	0.000265986	0.397428	-1.33123	-2.51618	25.3123	63.6902	0.361844	0.701	0.828295	-0.271783	-1.2073	52.7543	63.6902	0.00117037	0.00743444	2.08414	1.05945	2.08414	52.7543	25.3123
ARID3B	AT-rich interaction domain 3B	ARID3B	ARID3B	protein_coding	0.00433014	0.0177174	0.575932	-0.796028	-1.73631	352.427	611.924	0.342968	0.68563	1.19993	0.26295	1.19993	734.266	611.924	0.000147369	0.00122707	2.08346	1.05898	2.08346	734.266	352.427
GEMIN6	gem nuclear organelle associated protein 6	GEMIN6	GEMIN6	protein_coding	0.0126641	0.0423354	1.69396	0.760396	1.69396	264.348	156.054	0.144311	0.464925	1.36362	0.447439	1.36362	212.797	156.054	0.303553	0.520656	0.80499	-0.312957	-1.24225	212.797	264.348
DNAI4	dynein axonemal intermediate chain 4	DNAI4	DNAI4	protein_coding	0.0763788	0.171656	0.622182	-0.68459	-1.60725	17.7089	28.4626	0.300827	0.649521	1.29527	0.373252	1.29527	36.8667	28.4626	0.00586074	0.0285022	2.08182	1.05784	2.08182	36.8667	17.7089
MRPS28	mitochondrial ribosomal protein S28	MRPS28	MRPS28	protein_coding	0.00445296	0.0181232	1.69363	0.760117	1.69363	540.489	319.131	0.301432	0.650228	1.21205	0.277445	1.21205	386.802	319.131	0.0708637	0.198398	0.715651	-0.482672	-1.39733	386.802	540.489
IDS	iduronate 2-sulfatase	IDS	IDS	protein_coding	0.375176	0.540549	0.880147	-0.184184	-1.13617	3970.42	4511.09	2.59346e-05	0.000858082	1.83125	0.872829	1.83125	8260.94	4511.09	3.54492e-07	5.36286e-06	2.08062	1.05701	2.08062	8260.94	3970.42
SLCO2B1	solute carrier organic anion transporter family member 2B1	SLCO2B1	SLCO2B1	protein_coding	0.82663	0.896832	1.04447	0.0627725	1.04447	7735.13	7405.79	9.3515e-05	0.00246226	2.17262	1.11944	2.17262	16090	7405.79	0.000226334	0.00179261	2.08012	1.05667	2.08012	16090	7735.13
KCTD12	potassium channel tetramerization domain containing 12	KCTD12	KCTD12	protein_coding	7.55922e-20	6.86149e-18	0.257186	-1.95911	-3.88823	2945.28	11451.9	2.37296e-05	0.000792729	0.533395	-0.906723	-1.87478	6108.41	11451.9	9.79297e-07	1.35656e-05	2.07396	1.05239	2.07396	6108.41	2945.28
GRPEL1	GrpE like 1, mitochondrial	GRPEL1	GRPEL1	protein_coding	3.79303e-05	0.000315066	1.68943	0.75654	1.68943	1001.37	592.728	0.015272	0.123566	1.36324	0.447034	1.36324	808.027	592.728	0.0912711	0.238265	0.806918	-0.309506	-1.23928	808.027	1001.37
NMRK1	nicotinamide riboside kinase 1	NMRK1	NMRK1	protein_coding	9.38417e-13	3.34557e-11	0.456694	-1.1307	-2.18965	254.497	557.26	0.603134	0.858414	0.945969	-0.0801348	-1.05712	527.151	557.26	4.27591e-11	1.24461e-09	2.07134	1.05056	2.07134	527.151	254.497
PDE7B	phosphodiesterase 7B	PDE7B	PDE7B	protein_coding	0.000606416	0.00345447	0.435419	-1.19952	-2.29664	620.176	1424.32	0.664137	0.885409	0.900273	-0.151565	-1.11077	1282.28	1424.32	0.00275612	0.0152165	2.0676	1.04796	2.0676	1282.28	620.176
EMILIN1	elastin microfibril interfacer 1	EMILIN1	EMILIN1	protein_coding	0.200541	0.348843	1.32133	0.401993	1.32133	11963	9053.77	3.90107e-06	0.000162118	2.73156	1.44972	2.73156	24730.9	9053.77	0.000847706	0.00562298	2.06727	1.04773	2.06727	24730.9	11963
ENSCAFG00000011952	#N/A	ENSCAFG00000011952	---	protein_coding	0.000697484	0.00387095	1.68628	0.753843	1.68628	331.367	196.508	0.166655	0.498739	1.24018	0.310544	1.24018	243.704	196.508	0.0459064	0.144079	0.735451	-0.443299	-1.35971	243.704	331.367
CD80	CD80 molecule	CD80	CD80	protein_coding	0.0654732	0.15241	0.646428	-0.629438	-1.54696	1904.57	2946.3	0.22087	0.567581	1.33609	0.418013	1.33609	3936.52	2946.3	0.00217274	0.0124438	2.06687	1.04745	2.06687	3936.52	1904.57
MRTFB	myocardin related transcription factor B	MRTFB	MRTFB	protein_coding	0.139647	0.268982	0.802941	-0.316634	-1.24542	205.519	255.957	0.000561813	0.0104748	1.65433	0.726249	1.65433	423.438	255.957	9.51135e-07	1.3242e-05	2.06034	1.04288	2.06034	423.438	205.519
LRP12	LDL receptor related protein 12	LRP12	LRP12	protein_coding	0.828051	0.897715	1.04833	0.0680996	1.04833	202.345	193.015	0.000363629	0.00733477	2.1561	1.10843	2.1561	416.161	193.015	0.000829119	0.00552626	2.05669	1.04033	2.05669	416.161	202.345
SMIM4	small integral membrane protein 4	SMIM4	SMIM4	protein_coding	8.34239e-07	1.03975e-05	0.409579	-1.28779	-2.44153	314.138	766.978	0.338291	0.681853	0.841885	-0.248304	-1.18781	645.707	766.978	7.2756e-05	0.000650982	2.05549	1.03948	2.05549	645.707	314.138
DKC1	dyskerin pseudouridine synthase 1	DKC1	DKC1	protein_coding	0.00718135	0.0268367	1.683	0.751032	1.683	1172.76	696.829	0.358423	0.698225	1.19505	0.257076	1.19505	832.748	696.829	0.077044	0.210735	0.710075	-0.493957	-1.4083	832.748	1172.76
EIF4EBP1	eukaryotic translation initiation factor 4E binding protein 1	EIF4EBP1	EIF4EBP1	protein_coding	1.0388e-09	2.34189e-08	0.295702	-1.75778	-3.38179	189.167	639.724	0.0114524	0.102454	0.606917	-0.72043	-1.64767	388.259	639.724	0.000341846	0.00255911	2.05246	1.03736	2.05246	388.259	189.167
PUS1	pseudouridine synthase 1	PUS1	PUS1	protein_coding	0.0013688	0.00681472	1.68203	0.750202	1.68203	1364.35	811.132	0.201982	0.548025	1.23087	0.299679	1.23087	998.399	811.132	0.054506	0.163839	0.731778	-0.450523	-1.36654	998.399	1364.35
CCNG2	cyclin G2	CCNG2	CCNG2	protein_coding	0.000189251	0.00128022	0.357302	-1.48478	-2.79875	662	1852.77	0.255407	0.605576	0.731213	-0.451637	-1.36759	1354.77	1852.77	0.00943927	0.0419567	2.04648	1.03315	2.04648	1354.77	662
SERF1A	small EDRK-rich factor 1A	SERF1A	SERF1A	protein_coding	0.00101178	0.00527172	0.495659	-1.01258	-2.01752	78.1676	157.704	0.949528	0.98556	1.0133	0.019058	1.0133	159.802	157.704	0.000848652	0.00562655	2.04434	1.03164	2.04434	159.802	78.1676
ENSCAFG00000017667	#N/A	ENSCAFG00000017667	---	protein_coding	0.00121457	0.00613375	1.6806	0.748974	1.6806	1369.72	815.02	0.0569227	0.282503	1.35796	0.441441	1.35796	1106.76	815.02	0.183634	0.378639	0.808022	-0.307533	-1.23759	1106.76	1369.72
NDRG1	N-myc downstream regulated 1	NDRG1	NDRG1	protein_coding	6.90761e-21	7.11226e-19	0.377572	-1.40517	-2.6485	2313.53	6127.38	0.0122206	0.106377	0.771486	-0.374289	-1.2962	4727.18	6127.38	6.42569e-12	2.05697e-10	2.04328	1.03089	2.04328	4727.18	2313.53
ATP5F1E	ATP synthase F1 subunit epsilon	ATP5F1E	ATP5F1E	protein_coding	0.0136116	0.0447461	1.67922	0.747789	1.67922	336.636	200.472	0.704029	0.902043	1.08373	0.116008	1.08373	217.258	200.472	0.0374468	0.123624	0.645379	-0.63178	-1.54948	217.258	336.636
MAP4K4	mitogen-activated protein kinase kinase kinase kinase 4	MAP4K4	MAP4K4	protein_coding	9.81001e-13	3.4794e-11	0.358854	-1.47853	-2.78665	3465.21	9656.31	0.0300749	0.192192	0.732524	-0.449052	-1.36514	7073.48	9656.31	6.88389e-07	9.85239e-06	2.04129	1.02948	2.04129	7073.48	3465.21
STXBP5	syntaxin binding protein 5	STXBP5	STXBP5	protein_coding	2.90594e-08	4.96818e-07	0.640189	-0.64343	-1.56204	1349.57	2108.08	0.000799601	0.0140001	1.30618	0.385354	1.30618	2753.54	2108.08	6.91231e-19	4.33496e-17	2.0403	1.02878	2.0403	2753.54	1349.57
MYC	MYC proto-oncogene, bHLH transcription factor	MYC	MYC	protein_coding	0.209855	0.360211	0.743552	-0.427495	-1.3449	626.696	842.841	0.0773425	0.334617	1.51656	0.600801	1.51656	1278.22	842.841	0.00254225	0.0141719	2.03961	1.0283	2.03961	1278.22	626.696
GLRX	glutaredoxin	GLRX	GLRX	protein_coding	0.776982	0.86602	1.03576	0.0506877	1.03576	9087.17	8773.44	1.63415e-09	1.35822e-07	2.11204	1.07864	2.11204	18529.9	8773.44	9.09821e-09	1.846e-07	2.03912	1.02795	2.03912	18529.9	9087.17
ENSCAFG00000043633	#N/A	ENSCAFG00000043633	---	protein_coding	0.00332423	0.014248	0.606474	-0.721483	-1.64888	64.5783	106.482	0.198492	0.543583	1.23314	0.302339	1.23314	131.307	106.482	3.00231e-05	0.000297151	2.0333	1.02382	2.0333	131.307	64.5783
CDA	cytidine deaminase	CDA	CDA	protein_coding	9.87035e-08	1.51819e-06	0.507489	-0.978552	-1.97049	2340.84	4612.59	0.805263	0.939997	1.03181	0.0451733	1.03181	4759.31	4612.59	2.50069e-08	4.70696e-07	2.03316	1.02373	2.03316	4759.31	2340.84
RUNX1	RUNX family transcription factor 1	RUNX1	RUNX1	protein_coding	9.50868e-08	1.46911e-06	0.497337	-1.0077	-2.01071	1041.8	2094.75	0.945468	0.98504	1.00895	0.0128595	1.00895	2113.5	2094.75	6.67735e-08	1.15448e-06	2.02871	1.02056	2.02871	2113.5	1041.8
FHOD1	formin homology 2 domain containing 1	FHOD1	FHOD1	protein_coding	1.31859e-28	2.56233e-26	0.431771	-1.21166	-2.31604	1101.76	2551.72	0.0729639	0.32338	0.874608	-0.193291	-1.14337	2231.75	2551.72	1.53237e-20	1.09545e-18	2.02563	1.01837	2.02563	2231.75	1101.76
CHSY1	chondroitin sulfate synthase 1	CHSY1	CHSY1	protein_coding	0.00960608	0.0339746	0.787399	-0.344833	-1.27	1738.2	2207.51	3.84414e-07	2.03507e-05	1.59372	0.672401	1.59372	3518.17	2207.51	1.95111e-14	8.41233e-13	2.02403	1.01723	2.02403	3518.17	1738.2
CRTC3	CREB regulated transcription coactivator 3	CRTC3	CRTC3	protein_coding	0.136458	0.264686	0.777731	-0.362656	-1.28579	1893.97	2435.25	0.00712985	0.0732891	1.5739	0.654348	1.5739	3832.84	2435.25	2.94132e-05	0.000291742	2.02371	1.017	2.02371	3832.84	1893.97
DDX39A	DExD-box helicase 39A	DDX39A	DDX39A	protein_coding	0.00147697	0.00725189	1.67141	0.741066	1.67141	1884.7	1127.61	0.054993	0.277203	1.36395	0.447795	1.36395	1538.01	1127.61	0.20805	0.409949	0.81605	-0.293271	-1.22542	1538.01	1884.7
ENSCAFG00000008488	#N/A	ENSCAFG00000008488	---	protein_coding	0.000364089	0.0022587	1.67129	0.740959	1.67129	960.658	574.801	0.0173617	0.135354	1.40994	0.495637	1.40994	810.437	574.801	0.236978	0.446603	0.843627	-0.245322	-1.18536	810.437	960.658
TP53I13	tumor protein p53 inducible protein 13	TP53I13	TP53I13	protein_coding	1.37889e-16	8.16502e-15	0.350269	-1.51346	-2.85494	751.683	2146.01	0.00629548	0.0673323	0.708655	-0.496845	-1.41112	1520.78	2146.01	3.08635e-08	5.71576e-07	2.02317	1.01662	2.02317	1520.78	751.683
TMEM126B	transmembrane protein 126B	TMEM126B	TMEM126B	protein_coding	0.0138575	0.0453782	1.67001	0.739855	1.67001	572.724	342.947	0.543274	0.82405	1.13562	0.183476	1.13562	389.456	342.947	0.0643678	0.185391	0.680007	-0.556379	-1.47057	389.456	572.724
UTP6	UTP6 small subunit processome component	UTP6	UTP6	protein_coding	1.14128e-05	0.000107703	1.66744	0.737635	1.66744	676.992	406.007	0.0149684	0.122065	1.33015	0.411594	1.33015	540.052	406.007	0.0517419	0.15759	0.797722	-0.326042	-1.25357	540.052	676.992
MFHAS1	multifunctional ROCO family signaling regulator 1	MFHAS1	MFHAS1	protein_coding	0.000592755	0.00339487	1.66662	0.736929	1.66662	716.555	429.944	0.145074	0.465919	1.24323	0.314098	1.24323	534.521	429.944	0.0486019	0.150283	0.74596	-0.422831	-1.34056	534.521	716.555
KLHL8	kelch like family member 8	KLHL8	KLHL8	protein_coding	8.68527e-08	1.35402e-06	0.520769	-0.941285	-1.92024	239.956	460.772	0.667998	0.885733	1.05244	0.0737439	1.05244	484.937	460.772	8.70656e-09	1.76914e-07	2.02094	1.01503	2.02094	484.937	239.956
SASH3	SAM and SH3 domain containing 3	SASH3	SASH3	protein_coding	0.587034	0.725966	0.91739	-0.124394	-1.09005	2964.19	3231.12	0.000105948	0.00270698	1.84925	0.886938	1.84925	5975.14	3231.12	9.94071e-06	0.000111415	2.01577	1.01133	2.01577	5975.14	2964.19
RGS9	regulator of G protein signaling 9	RGS9	RGS9	protein_coding	6.34567e-05	0.000495199	0.515225	-0.956726	-1.9409	139.483	270.723	0.818044	0.944403	1.03806	0.0538959	1.03806	281.028	270.723	2.53344e-05	0.000256825	2.01478	1.01062	2.01478	281.028	139.483
ENSCAFG00000009857	#N/A	ENSCAFG00000009857	---	protein_coding	0.00101777	0.00529694	1.66421	0.734842	1.66421	374.505	225.034	0.00514787	0.0587558	1.545	0.627609	1.545	347.678	225.034	0.629424	0.793904	0.928367	-0.107232	-1.07716	347.678	374.505
GRAMD1A	GRAM domain containing 1A	GRAMD1A	GRAMD1A	protein_coding	0.0221568	0.065376	0.575047	-0.798248	-1.73899	2511.68	4367.79	0.543204	0.82405	1.15832	0.212029	1.15832	5059.28	4367.79	0.00378883	0.019846	2.0143	1.01028	2.0143	5059.28	2511.68
PLK3	polo like kinase 3	PLK3	PLK3	protein_coding	0.0212775	0.0633502	0.645672	-0.631127	-1.54877	605.752	938.174	0.166247	0.498059	1.29955	0.378013	1.29955	1219.2	938.174	0.000229941	0.00181909	2.01271	1.00914	2.01271	1219.2	605.752
RBPJ	recombination signal binding protein for immunoglobulin kappa J region	RBPJ	RBPJ	protein_coding	0.196561	0.343851	0.847414	-0.238862	-1.18006	817.086	964.212	2.8927e-05	0.000943289	1.70407	0.768988	1.70407	1643.09	964.212	4.65081e-08	8.35511e-07	2.01091	1.00785	2.01091	1643.09	817.086
LCP2	lymphocyte cytosolic protein 2	LCP2	LCP2	protein_coding	3.22478e-05	0.000272959	1.66187	0.73281	1.66187	6916.36	4161.79	0.00522231	0.0592688	1.40695	0.492572	1.40695	5855.43	4161.79	0.172776	0.364383	0.846605	-0.240239	-1.18119	5855.43	6916.36
MRPS15	mitochondrial ribosomal protein S15	MRPS15	MRPS15	protein_coding	6.69685e-05	0.000519081	1.66083	0.731904	1.66083	399.795	240.72	0.041115	0.23373	1.30007	0.37859	1.30007	312.953	240.72	0.0535101	0.161761	0.782784	-0.353315	-1.27749	312.953	399.795
RCN3	reticulocalbin 3	RCN3	RCN3	protein_coding	3.998e-05	0.000328532	0.484698	-1.04484	-2.06314	69.2875	142.95	0.874456	0.96465	0.973528	-0.0387063	-1.02719	139.166	142.95	8.66138e-05	0.000759219	2.00852	1.00614	2.00852	139.166	69.2875
ZBTB14	zinc finger and BTB domain containing 14	ZBTB14	ZBTB14	protein_coding	2.88462e-06	3.19928e-05	0.51529	-0.956544	-1.94066	570.336	1106.83	0.810308	0.942815	1.03436	0.0487338	1.03436	1144.85	1106.83	9.02052e-07	1.26223e-05	2.00733	1.00528	2.00733	1144.85	570.336
DDAH2	dimethylarginine dimethylaminohydrolase 2	DDAH2	DDAH2	protein_coding	9.5294e-11	2.60226e-09	0.348176	-1.52211	-2.87211	157.852	453.369	0.0244029	0.168175	0.697759	-0.519198	-1.43316	316.343	453.369	2.35687e-05	0.000240694	2.00404	1.00291	2.00404	316.343	157.852
ELP3	elongator acetyltransferase complex subunit 3	ELP3	ELP3	protein_coding	1.78714e-05	0.000160582	1.65892	0.73024	1.65892	655.366	395.057	0.0462939	0.250754	1.2673	0.341762	1.2673	500.657	395.057	0.0222627	0.0824145	0.763935	-0.388478	-1.30901	500.657	655.366
ULK2	unc-51 like autophagy activating kinase 2	ULK2	ULK2	protein_coding	2.35794e-14	1.07015e-12	0.267983	-1.89979	-3.73159	1755.04	6549.1	0.000299292	0.00627558	0.536276	-0.898952	-1.86471	3512.13	6549.1	5.92332e-05	0.000541578	2.00116	1.00084	2.00116	3512.13	1755.04
NLN	neurolysin	NLN	NLN	protein_coding	0.00324225	0.0139661	1.65795	0.729401	1.65795	108.926	65.6994	0.0496916	0.261877	1.40737	0.493	1.40737	92.4632	65.6994	0.334075	0.553461	0.84886	-0.236401	-1.17805	92.4632	108.926
PCNX1	pecanex 1	PCNX1	PCNX1	protein_coding	0.00120587	0.00609428	1.65732	0.728853	1.65732	6925.57	4178.78	0.113488	0.407336	1.28027	0.356449	1.28027	5349.96	4178.78	0.0980528	0.250525	0.772494	-0.372404	-1.29451	5349.96	6925.57
MICAL2	microtubule associated monooxygenase, calponin and LIM domain containing 2	MICAL2	MICAL2	protein_coding	7.63197e-07	9.61628e-06	0.301786	-1.7284	-3.31361	374.448	1240.77	0.0364433	0.218328	0.603475	-0.728635	-1.65707	748.776	1240.77	0.00431272	0.0221281	1.99968	0.999768	1.99968	748.776	374.448
ENSCAFG00000000314	#N/A	ENSCAFG00000000314	---	protein_coding	0.00547912	0.0215494	1.65579	0.727522	1.65579	416.622	251.615	0.171051	0.504811	1.28367	0.360274	1.28367	322.99	251.615	0.160383	0.346684	0.77526	-0.367248	-1.28989	322.99	416.622
EML4	EMAP like 4	EML4	EML4	protein_coding	0.161574	0.299048	0.803754	-0.315174	-1.24416	2909.21	3619.52	0.00238033	0.0326455	1.60584	0.683325	1.60584	5812.36	3619.52	9.14643e-06	0.000103607	1.99792	0.998498	1.99792	5812.36	2909.21
ABHD11	abhydrolase domain containing 11	ABHD11	ABHD11	protein_coding	0.0036759	0.0154576	1.65373	0.725722	1.65373	154.26	93.2799	0.560541	0.834111	1.10848	0.148579	1.10848	103.399	93.2799	0.0214045	0.0799019	0.67029	-0.577143	-1.49189	103.399	154.26
NAT10	N-acetyltransferase 10	NAT10	NAT10	protein_coding	0.00472441	0.0190203	1.65158	0.723849	1.65158	827.255	500.886	0.0583466	0.286716	1.40044	0.485878	1.40044	701.46	500.886	0.352302	0.571292	0.847937	-0.237972	-1.17933	701.46	827.255
TTC21B	tetratricopeptide repeat domain 21B	TTC21B	TTC21B	protein_coding	5.70359e-06	5.81614e-05	0.471672	-1.08414	-2.12012	153.882	326.249	0.714628	0.906989	0.942295	-0.0857498	-1.06124	307.422	326.249	3.19291e-05	0.000313764	1.99777	0.998394	1.99777	307.422	153.882
TPST1	tyrosylprotein sulfotransferase 1	TPST1	TPST1	protein_coding	0.0527499	0.129469	0.731863	-0.450354	-1.36638	914.433	1249.46	0.0189451	0.143068	1.45783	0.543826	1.45783	1821.5	1249.46	1.87437e-05	0.000195322	1.99195	0.99418	1.99195	1821.5	914.433
ERGIC2	ERGIC and golgi 2	ERGIC2	ERGIC2	protein_coding	0.000849536	0.00456783	1.6464	0.719316	1.6464	1080.31	656.164	0.383028	0.718407	1.13983	0.188818	1.13983	747.915	656.164	0.0139272	0.057002	0.692316	-0.530498	-1.44443	747.915	1080.31
SDF2L1	stromal cell derived factor 2 like 1	SDF2L1	SDF2L1	protein_coding	0.00573047	0.0223343	1.6455	0.718526	1.6455	2952.03	1794	0.139736	0.456642	1.30523	0.384305	1.30523	2341.59	1794	0.198649	0.397845	0.793212	-0.334221	-1.2607	2341.59	2952.03
SOAT1	sterol O-acyltransferase 1	SOAT1	SOAT1	protein_coding	1.92532e-06	2.21364e-05	0.442991	-1.17465	-2.25738	4392.46	9915.46	0.462934	0.772039	0.882105	-0.180978	-1.13365	8746.47	9915.46	5.65243e-05	0.000519218	1.99125	0.993672	1.99125	8746.47	4392.46
PIGL	phosphatidylinositol glycan anchor biosynthesis class L	PIGL	PIGL	protein_coding	0.0721808	0.164147	0.747905	-0.419072	-1.33707	207.621	277.603	0.0125019	0.10794	1.48846	0.573817	1.48846	413.201	277.603	1.89143e-05	0.000196803	1.99017	0.992889	1.99017	413.201	207.621
CLDN5	claudin 5	CLDN5	CLDN5	protein_coding	0.84289	0.907126	0.94685	-0.0787924	-1.05613	55.2792	58.3822	0.019206	0.144249	1.88376	0.913617	1.88376	109.978	58.3822	0.0114651	0.0489735	1.9895	0.992409	1.9895	109.978	55.2792
RUVBL1	RuvB like AAA ATPase 1	RUVBL1	RUVBL1	protein_coding	0.0128192	0.0426184	1.6437	0.716949	1.6437	2001.76	1217.84	0.0972957	0.377606	1.39275	0.477935	1.39275	1696.14	1217.84	0.406503	0.621787	0.847324	-0.239014	-1.18019	1696.14	2001.76
ANKRD9	ankyrin repeat domain 9	ANKRD9	ANKRD9	protein_coding	0.000512899	0.00301407	1.64233	0.715744	1.64233	1140.42	694.389	0.0253688	0.173082	1.37706	0.461592	1.37706	956.216	694.389	0.216717	0.421549	0.83848	-0.254151	-1.19263	956.216	1140.42
AP2A2	adaptor related protein complex 2 subunit alpha 2	AP2A2	AP2A2	protein_coding	0.492895	0.649768	0.933537	-0.099221	-1.07119	3186.27	3413.12	7.65313e-10	6.68293e-08	1.85077	0.888125	1.85077	6316.9	3413.12	8.29341e-12	2.6184e-10	1.98253	0.987346	1.98253	6316.9	3186.27
HSPA4L	heat shock protein family A (Hsp70) member 4 like	HSPA4L	HSPA4L	protein_coding	0.000549732	0.00319219	1.64221	0.715643	1.64221	286.551	174.491	0.0215737	0.15592	1.3943	0.479544	1.3943	243.293	174.491	0.251397	0.463335	0.849038	-0.236099	-1.1778	243.293	286.551
AP1B1	adaptor related protein complex 1 subunit beta 1	AP1B1	AP1B1	protein_coding	0.938741	0.965185	1.00743	0.0106767	1.00743	6232.72	6186.76	6.58209e-13	9.4597e-11	1.99637	0.99738	1.99637	12351.1	6186.76	1.16874e-12	4.07199e-11	1.98165	0.986703	1.98165	12351.1	6232.72
WHRN	whirlin	WHRN	WHRN	protein_coding	5.95784e-07	7.68946e-06	0.358081	-1.48164	-2.79266	102.119	285.183	0.089076	0.360726	0.7093	-0.495532	-1.40984	202.281	285.183	0.000985864	0.00639791	1.98083	0.986108	1.98083	202.281	102.119
CREB3L4	cAMP responsive element binding protein 3 like 4	CREB3L4	CREB3L4	protein_coding	0.0104578	0.0363259	0.575446	-0.797247	-1.73778	54.7666	95.1725	0.531938	0.817824	1.13973	0.188689	1.13973	108.471	95.1725	0.00157161	0.00952281	1.9806	0.985936	1.9806	108.471	54.7666
ENSCAFG00000044246	#N/A	ENSCAFG00000044246	---	protein_coding	0.000719497	0.00397474	1.63935	0.713128	1.63935	155.262	94.7095	0.402708	0.730662	1.13391	0.18131	1.13391	107.392	94.7095	0.0119627	0.0506132	0.691683	-0.531818	-1.44575	107.392	155.262
NCOA7	nuclear receptor coactivator 7	NCOA7	NCOA7	protein_coding	3.60006e-06	3.87441e-05	0.387711	-1.36695	-2.57924	1410.01	3636.75	0.195444	0.539847	0.767669	-0.381444	-1.30264	2791.82	3636.75	0.000842197	0.00559451	1.98	0.985502	1.98	2791.82	1410.01
ENSCAFG00000032627	#N/A	ENSCAFG00000032627	---	protein_coding	0.0129647	0.0429832	0.612864	-0.706361	-1.63168	122.72	200.24	0.319651	0.66484	1.21278	0.278321	1.21278	242.847	200.24	0.000530946	0.00375472	1.97888	0.984683	1.97888	242.847	122.72
MORC2	MORC family CW-type zinc finger 2	MORC2	MORC2	protein_coding	0.00079172	0.00430054	1.63716	0.711199	1.63716	1974.64	1206.13	0.307053	0.655995	1.16225	0.216922	1.16225	1401.83	1206.13	0.0197129	0.0751116	0.709917	-0.494277	-1.40861	1401.83	1974.64
ATP5F1D	ATP synthase F1 subunit delta	ATP5F1D	ATP5F1D	protein_coding	0.000430134	0.00260745	1.63643	0.710548	1.63643	4543.24	2776.32	0.0216795	0.15645	1.37896	0.463585	1.37896	3828.45	2776.32	0.22087	0.42644	0.842668	-0.246963	-1.18671	3828.45	4543.24
ENSCAFG00000003268	#N/A	ENSCAFG00000003268	---	protein_coding	0.404848	0.568056	1.10308	0.141539	1.10308	1612.12	1461.47	2.986e-11	3.32241e-09	2.18211	1.12572	2.18211	3189.1	1461.47	6.19479e-09	1.29499e-07	1.9782	0.984186	1.9782	3189.1	1612.12
CCT5	chaperonin containing TCP1 subunit 5	CCT5	CCT5	protein_coding	0.00538236	0.0212659	1.63454	0.708887	1.63454	3017.75	1846.24	0.137872	0.453451	1.29968	0.378154	1.29968	2399.51	1846.24	0.194013	0.391517	0.795133	-0.330732	-1.25765	2399.51	3017.75
ENSCAFG00000010687	#N/A	ENSCAFG00000010687	---	protein_coding	0.000521681	0.00304855	1.63443	0.70879	1.63443	1687.92	1032.72	0.115312	0.410818	1.25039	0.322377	1.25039	1291.3	1032.72	0.0584879	0.172648	0.765029	-0.386413	-1.30714	1291.3	1687.92
RPS6KA5	ribosomal protein S6 kinase A5	RPS6KA5	RPS6KA5	protein_coding	0.000183088	0.00124437	0.409449	-1.28824	-2.44231	734.675	1794.3	0.370592	0.708377	0.807912	-0.307731	-1.23776	1449.64	1794.3	0.00443328	0.0225622	1.97317	0.980514	1.97317	1449.64	734.675
ZNF202	zinc finger protein 202	ZNF202	ZNF202	protein_coding	0.000142876	0.00100987	1.63346	0.707931	1.63346	258.94	158.523	0.14612	0.467816	1.21021	0.275259	1.21021	191.846	158.523	0.019987	0.0758418	0.740888	-0.432672	-1.34973	191.846	258.94
GET3	guided entry of tail-anchored proteins factor 3, ATPase	GET3	GET3	protein_coding	1.53205e-06	1.80202e-05	1.63216	0.706785	1.63216	2907.2	1781.2	0.00611874	0.0660441	1.32299	0.403801	1.32299	2356.51	1781.2	0.0391739	0.127875	0.810574	-0.302983	-1.23369	2356.51	2907.2
UCK2	uridine-cytidine kinase 2	UCK2	UCK2	protein_coding	1.79648e-07	2.61913e-06	0.470259	-1.08847	-2.12649	526.819	1120.27	0.578571	0.845159	0.92336	-0.115035	-1.083	1034.42	1120.27	3.18205e-06	3.99116e-05	1.96351	0.973437	1.96351	1034.42	526.819
WDR74	WD repeat domain 74	WDR74	WDR74	protein_coding	0.000354512	0.00220424	1.63173	0.706405	1.63173	591.588	362.552	0.048187	0.25719	1.31289	0.392752	1.31289	475.993	362.552	0.112032	0.274558	0.804602	-0.313653	-1.24285	475.993	591.588
GLI1	GLI family zinc finger 1	GLI1	GLI1	protein_coding	3.78187e-09	7.77622e-08	0.336149	-1.57283	-2.97487	66.4716	197.745	0.0193526	0.145071	0.658399	-0.602967	-1.51884	130.195	197.745	0.000357368	0.00265674	1.95865	0.96986	1.95865	130.195	66.4716
CCR7	C-C motif chemokine receptor 7	CCR7	CCR7	protein_coding	1.97364e-06	2.2579e-05	3.57101	1.83633	3.57101	354.309	99.2183	0.000393564	0.00781296	2.5899	1.37289	2.5899	256.965	99.2183	0.224585	0.431059	0.725257	-0.463436	-1.37882	256.965	354.309
DAZAP1	DAZ associated protein 1	DAZAP1	DAZAP1	protein_coding	0.000716021	0.0039595	1.62792	0.703034	1.62792	2618.52	1608.5	0.251312	0.600719	1.17995	0.238729	1.17995	1897.95	1608.5	0.0254601	0.0914058	0.72482	-0.464305	-1.37965	1897.95	2618.52
PSPH	phosphoserine phosphatase	PSPH	PSPH	protein_coding	6.56178e-05	0.000509758	0.488594	-1.03329	-2.04669	196.917	403.027	0.800833	0.938407	0.956265	-0.0645179	-1.04574	385.401	403.027	0.000190414	0.00154266	1.95718	0.968774	1.95718	385.401	196.917
MBP	myelin basic protein	MBP	MBP	protein_coding	0.0013203	0.00659864	0.559778	-0.837072	-1.78642	1469.43	2625.02	0.613294	0.861935	1.09544	0.131514	1.09544	2875.56	2625.02	0.000202852	0.00163383	1.95692	0.968586	1.95692	2875.56	1469.43
MRPS12	mitochondrial ribosomal protein S12	MRPS12	MRPS12	protein_coding	5.38011e-05	0.000425627	1.62667	0.701924	1.62667	711.433	437.355	0.123185	0.427354	1.20573	0.269912	1.20573	527.333	437.355	0.0129152	0.0537044	0.741227	-0.432012	-1.34911	527.333	711.433
PHACTR4	phosphatase and actin regulator 4	PHACTR4	PHACTR4	protein_coding	0.00323827	0.0139576	1.62592	0.701253	1.62592	2808.37	1727.25	0.200619	0.545594	1.23551	0.305104	1.23551	2134.04	1727.25	0.0962352	0.247468	0.759884	-0.396148	-1.31599	2134.04	2808.37
OMG	oligodendrocyte myelin glycoprotein	OMG	OMG	protein_coding	0.00267354	0.0118798	0.507397	-0.978812	-1.97084	33.2792	65.5881	0.972795	0.992032	0.992673	-0.0106091	-1.00738	65.1075	65.5881	0.0032408	0.0173779	1.9564	0.968203	1.9564	65.1075	33.2792
CD58	CD58 molecule	CD58	CD58	protein_coding	0.000381856	0.0023541	0.642734	-0.637707	-1.55585	568.289	884.176	0.065134	0.304732	1.25548	0.328238	1.25548	1110.06	884.176	7.31456e-08	1.26149e-06	1.95334	0.965945	1.95334	1110.06	568.289
C1H18orf54	#N/A	C1H18orf54	C1H18orf54	protein_coding	0.000907424	0.00481807	0.530281	-0.915171	-1.88579	79.6995	150.297	0.853714	0.956463	1.03493	0.0495262	1.03493	155.546	150.297	0.000496806	0.00353869	1.95165	0.964697	1.95165	155.546	79.6995
INSR	insulin receptor	INSR	INSR	protein_coding	1.87631e-08	3.3533e-07	0.377906	-1.4039	-2.64616	203.286	537.927	0.0742431	0.326282	0.737076	-0.440115	-1.35671	396.493	537.927	0.000124124	0.00105128	1.95042	0.963785	1.95042	396.493	203.286
SUCLA2	succinate-CoA ligase ADP-forming subunit beta	SUCLA2	SUCLA2	protein_coding	1.14904e-05	0.000108066	1.62238	0.698111	1.62238	1490.41	918.659	0.0387289	0.22669	1.25712	0.330123	1.25712	1154.87	918.659	0.020664	0.0778329	0.774862	-0.367988	-1.29055	1154.87	1490.41
PSMB1	proteasome 20S subunit beta 1	PSMB1	PSMB1	protein_coding	3.75243e-05	0.000313013	1.62054	0.696478	1.62054	4638.08	2862.05	0.0670695	0.309062	1.23947	0.309725	1.23947	3547.43	2862.05	0.0220551	0.0818654	0.764849	-0.386753	-1.30745	3547.43	4638.08
ENSCAFG00000046514	#N/A	ENSCAFG00000046514	---	protein_coding	0.000427589	0.0025943	1.62053	0.696466	1.62053	302.315	186.553	0.0219678	0.157272	1.37231	0.456605	1.37231	256.009	186.553	0.222439	0.428311	0.846827	-0.23986	-1.18088	256.009	302.315
AMT	aminomethyltransferase	AMT	AMT	protein_coding	1.73897e-05	0.000156609	0.38692	-1.36989	-2.58451	313.142	809.32	0.19784	0.542556	0.75336	-0.408588	-1.32739	609.71	809.32	0.00263058	0.0146053	1.94707	0.961304	1.94707	609.71	313.142
UBALD1	UBA like domain containing 1	UBALD1	UBALD1	protein_coding	1.054e-05	0.000100847	0.49396	-1.01753	-2.02446	113.517	229.81	0.793101	0.935322	0.959934	-0.0589924	-1.04174	220.602	229.81	3.71635e-05	0.000358062	1.94334	0.958542	1.94334	220.602	113.517
SESN1	sestrin 1	SESN1	SESN1	protein_coding	1.8003e-07	2.62013e-06	0.33815	-1.56426	-2.95727	129.403	382.679	0.039774	0.229121	0.656133	-0.607939	-1.52408	251.088	382.679	0.00154148	0.00937321	1.94036	0.956325	1.94036	251.088	129.403
MAP3K14	mitogen-activated protein kinase kinase kinase 14	MAP3K14	MAP3K14	protein_coding	0.055225	0.134073	0.80449	-0.313854	-1.24302	1891.75	2351.49	8.27504e-05	0.0022299	1.56099	0.64246	1.56099	3670.65	2351.49	4.98149e-09	1.05575e-07	1.94035	0.956314	1.94035	3670.65	1891.75
HECA	hdc homolog, cell cycle regulator	HECA	HECA	protein_coding	7.86255e-09	1.51297e-07	0.391244	-1.35386	-2.55595	568.328	1452.62	0.0883803	0.359782	0.759065	-0.397705	-1.31741	1102.63	1452.62	4.76545e-05	0.000446967	1.94013	0.956154	1.94013	1102.63	568.328
ITGAM	integrin subunit alpha M	ITGAM	ITGAM	protein_coding	1.00699e-24	1.59695e-22	0.398756	-1.32642	-2.5078	18516.1	46434.6	0.0039725	0.0485461	0.772768	-0.371893	-1.29405	35883.2	46434.6	1.50547e-13	5.85098e-12	1.93795	0.954531	1.93795	35883.2	18516.1
AAK1	AP2 associated kinase 1	AAK1	AAK1	protein_coding	0.000231469	0.00151714	0.720265	-0.473401	-1.38838	2441.1	3389.17	0.000173371	0.00403374	1.39564	0.480928	1.39564	4730.07	3389.17	1.10609e-13	4.4106e-12	1.93768	0.954329	1.93768	4730.07	2441.1
ICAM4	intercellular adhesion molecule 4 (Landsteiner-Wiener blood group)	ICAM4	ICAM4	protein_coding	0.0132792	0.0438413	1.82556	0.868338	1.82556	62.7334	34.364	1.14517e-07	6.66663e-06	3.53473	1.8216	3.53473	121.467	34.364	0.0041818	0.0215606	1.93625	0.953262	1.93625	121.467	62.7334
ENSCAFG00000030164	#N/A	ENSCAFG00000030164	---	protein_coding	1.10951e-13	4.61083e-12	4.10847	2.0386	4.10847	14275.5	3474.64	7.54847e-07	3.81488e-05	2.56327	1.35799	2.56327	8906.45	3474.64	0.0130806	0.0543059	0.623899	-0.680616	-1.60282	8906.45	14275.5
CCDC150	coiled-coil domain containing 150	CCDC150	CCDC150	protein_coding	0.00378775	0.0158507	0.544483	-0.877041	-1.8366	28.2979	51.972	0.788741	0.933708	1.0542	0.076143	1.0542	54.7887	51.972	0.00180347	0.0106917	1.93614	0.953184	1.93614	54.7887	28.2979
ENSCAFG00000019812	#N/A	ENSCAFG00000019812	---	protein_coding	0.000914704	0.00484832	0.578825	-0.7888	-1.72764	1221.57	2110.43	0.489118	0.790947	1.12054	0.164192	1.12054	2364.82	2110.43	6.20512e-05	0.000563979	1.93588	0.952992	1.93588	2364.82	1221.57
AHRR	aryl-hydrocarbon receptor repressor	AHRR	AHRR	protein_coding	0.0043323	0.017721	0.646397	-0.629507	-1.54704	5408.28	8366.8	0.142992	0.462577	1.25094	0.323008	1.25094	10466.3	8366.8	1.58325e-05	0.000169335	1.93524	0.952515	1.93524	10466.3	5408.28
GADD45A	growth arrest and DNA damage inducible alpha	GADD45A	GADD45A	protein_coding	3.76202e-09	7.74694e-08	0.282571	-1.82332	-3.53894	1476.73	5226.05	0.00481387	0.0556257	0.546742	-0.871069	-1.82902	2857.3	5226.05	0.00209622	0.0121138	1.93489	0.952248	1.93489	2857.3	1476.73
BBS7	Bardet-Biedl syndrome 7	BBS7	BBS7	protein_coding	1.25861e-10	3.3916e-09	0.449472	-1.1537	-2.22483	92.5355	205.876	0.231892	0.579179	0.868788	-0.202924	-1.15103	178.863	205.876	1.88737e-07	3.03497e-06	1.93291	0.950772	1.93291	178.863	92.5355
UBA2	ubiquitin like modifier activating enzyme 2	UBA2	UBA2	protein_coding	0.00109378	0.00561418	1.61193	0.688787	1.61193	2518.06	1562.14	0.0419511	0.236631	1.34672	0.429455	1.34672	2103.78	1562.14	0.21869	0.423753	0.835474	-0.259332	-1.19692	2103.78	2518.06
NQO1	NAD(P)H quinone dehydrogenase 1	NQO1	NQO1	protein_coding	2.97008e-22	3.5326e-20	0.320837	-1.64009	-3.11685	3675.63	11456.4	4.35568e-05	0.00131488	0.619896	-0.689901	-1.61317	7101.77	11456.4	1.94988e-08	3.73127e-07	1.93212	0.950187	1.93212	7101.77	3675.63
ARPC5L	actin related protein 2/3 complex subunit 5 like	ARPC5L	ARPC5L	protein_coding	1.39878e-05	0.000129165	1.61068	0.68767	1.61068	1017.23	631.55	0.00680824	0.0711077	1.34731	0.430076	1.34731	850.891	631.55	0.102901	0.258414	0.836482	-0.257594	-1.19548	850.891	1017.23
ELP6	elongator acetyltransferase complex subunit 6	ELP6	ELP6	protein_coding	0.00761591	0.0281104	1.60994	0.687006	1.60994	305.126	189.526	0.374407	0.711429	1.17329	0.230563	1.17329	222.37	189.526	0.076362	0.209269	0.728781	-0.456443	-1.37215	222.37	305.126
ENSCAFG00000019501	#N/A	ENSCAFG00000019501	---	protein_coding	8.8893e-05	0.000668005	1.60759	0.684904	1.60759	1691.59	1052.25	0.0061735	0.0664398	1.39413	0.479363	1.39413	1466.97	1052.25	0.23888	0.449146	0.867214	-0.205541	-1.15312	1466.97	1691.59
ARRDC3	arrestin domain containing 3	ARRDC3	ARRDC3	protein_coding	3.86718e-05	0.000319494	0.412689	-1.27687	-2.42313	1114.14	2699.71	0.290347	0.640882	0.796868	-0.327588	-1.25491	2151.31	2699.71	0.00223075	0.0127188	1.93091	0.949284	1.93091	2151.31	1114.14
ENSCAFG00000002015	#N/A	ENSCAFG00000002015	---	protein_coding	0.000214643	0.00142857	0.614346	-0.702876	-1.62775	1792.15	2917.16	0.193942	0.53811	1.18599	0.246094	1.18599	3459.73	2917.16	5.83273e-07	8.43544e-06	1.93049	0.948971	1.93049	3459.73	1792.15
ENSCAFG00000032470	#N/A	ENSCAFG00000032470	---	protein_coding	2.1692e-07	3.09498e-06	0.447473	-1.16013	-2.23477	277.894	621.03	0.339227	0.682959	0.863661	-0.211464	-1.15786	536.359	621.03	2.41325e-05	0.000245724	1.93009	0.948665	1.93009	536.359	277.894
MEF2D	myocyte enhancer factor 2D	MEF2D	MEF2D	protein_coding	3.00837e-07	4.16313e-06	0.46492	-1.10495	-2.15091	788.915	1696.88	0.462891	0.772039	0.89648	-0.157657	-1.11547	1521.22	1696.88	1.15396e-05	0.000127778	1.92825	0.947289	1.92825	1521.22	788.915
ENSCAFG00000048541	#N/A	ENSCAFG00000048541	---	protein_coding	0.00846624	0.0306504	1.60452	0.682143	1.60452	96.7301	60.286	0.100608	0.383318	1.34884	0.431715	1.34884	81.3159	60.286	0.329213	0.54804	0.840647	-0.250428	-1.18956	81.3159	96.7301
PEMT	phosphatidylethanolamine N-methyltransferase	PEMT	PEMT	protein_coding	0.000450493	0.00271417	0.407034	-1.29678	-2.4568	452.635	1112.03	0.343053	0.68563	0.784828	-0.349552	-1.27416	872.754	1112.03	0.0104656	0.0454801	1.92816	0.947228	1.92816	872.754	452.635
BMERB1	bMERB domain containing 1	BMERB1	BMERB1	protein_coding	5.38321e-07	7.07354e-06	0.47575	-1.07172	-2.10194	116.114	244.065	0.546754	0.827028	0.916974	-0.125047	-1.09054	223.801	244.065	1.13369e-05	0.000125635	1.92743	0.946676	1.92743	223.801	116.114
ARRB2	arrestin beta 2	ARRB2	ARRB2	protein_coding	3.66948e-11	1.06361e-09	0.394582	-1.3416	-2.53433	839.125	2126.62	0.0499743	0.262565	0.760163	-0.395619	-1.31551	1616.58	2126.62	3.22157e-06	4.02973e-05	1.9265	0.945984	1.9265	1616.58	839.125
YBX3	Y-box binding protein 3	YBX3	YBX3	protein_coding	2.42172e-09	5.1483e-08	0.513696	-0.961013	-1.94668	870.774	1695.12	0.91799	0.97773	0.988649	-0.0164691	-1.01148	1675.87	1695.12	4.75644e-09	1.01586e-07	1.92458	0.944543	1.92458	1675.87	870.774
XIAP	X-linked inhibitor of apoptosis	XIAP	XIAP	protein_coding	0.000299401	0.00190361	1.602	0.679871	1.602	1010.2	630.591	0.273242	0.624572	1.15429	0.20701	1.15429	727.887	630.591	0.0119516	0.0505817	0.720534	-0.472861	-1.38786	727.887	1010.2
PRKCB	protein kinase C beta	PRKCB	PRKCB	protein_coding	2.9386e-08	5.0178e-07	2.35623	1.23648	2.35623	4879.46	2070.87	1.343e-09	1.12984e-07	2.55232	1.35181	2.55232	5285.53	2070.87	0.604408	0.777062	1.08322	0.115327	1.08322	5285.53	4879.46
RASGEF1B	RasGEF domain family member 1B	RASGEF1B	RASGEF1B	protein_coding	0.101038	0.21189	1.65719	0.728735	1.65719	1311.42	791.354	0.00258979	0.034657	2.52852	1.3383	2.52852	2000.96	791.354	0.169711	0.359993	1.52579	0.60956	1.52579	2000.96	1311.42
NDUFS3	NADH:ubiquinone oxidoreductase core subunit S3	NDUFS3	NDUFS3	protein_coding	7.61191e-06	7.55007e-05	1.6014	0.67933	1.6014	1562.73	975.854	0.0387428	0.22669	1.24392	0.314891	1.24392	1213.88	975.854	0.0162844	0.0647107	0.776771	-0.364438	-1.28738	1213.88	1562.73
ENSCAFG00000019285	#N/A	ENSCAFG00000019285	---	protein_coding	0.00618034	0.0238385	1.60116	0.67912	1.60116	149.024	93.0724	0.227796	0.573736	1.23424	0.303624	1.23424	114.874	93.0724	0.129304	0.302257	0.77084	-0.375496	-1.29729	114.874	149.024
TTC9C	tetratricopeptide repeat domain 9C	TTC9C	TTC9C	protein_coding	0.000203044	0.00136189	0.622863	-0.683012	-1.60549	193.842	311.211	0.15471	0.479024	1.19369	0.255426	1.19369	371.489	311.211	3.32033e-07	5.03413e-06	1.91645	0.938438	1.91645	371.489	193.842
MKKS	MKKS centrosomal shuttling protein	MKKS	MKKS	protein_coding	0.000263483	0.00169953	1.60036	0.678395	1.60036	3260.89	2037.6	0.0446616	0.24579	1.29566	0.373684	1.29566	2640.03	2037.6	0.101109	0.255636	0.809604	-0.304711	-1.23517	2640.03	3260.89
PTPN21	protein tyrosine phosphatase non-receptor type 21	PTPN21	PTPN21	protein_coding	0.000102754	0.000756911	0.387095	-1.36924	-2.58334	304.493	786.609	0.218264	0.564672	0.741104	-0.432252	-1.34934	582.959	786.609	0.00798714	0.0366962	1.91453	0.936987	1.91453	582.959	304.493
ATG7	autophagy related 7	ATG7	ATG7	protein_coding	2.0206e-09	4.34918e-08	0.620588	-0.688292	-1.61137	675.714	1088.83	0.0275535	0.182329	1.18801	0.248545	1.18801	1293.54	1088.83	3.36326e-16	1.73145e-14	1.91433	0.936837	1.91433	1293.54	675.714
DHRS1	dehydrogenase/reductase 1	DHRS1	DHRS1	protein_coding	0.000462986	0.0027749	0.560735	-0.834609	-1.78337	218.799	390.2	0.670304	0.886279	1.07194	0.100225	1.07194	418.271	390.2	9.03271e-05	0.000788761	1.91167	0.934834	1.91167	418.271	218.799
ENSCAFG00000012274	#N/A	ENSCAFG00000012274	---	protein_coding	0.00208297	0.00967961	1.59736	0.675687	1.59736	356.335	223.078	0.0276561	0.18292	1.40023	0.485662	1.40023	312.36	223.078	0.384605	0.601268	0.87659	-0.190025	-1.14078	312.36	356.335
ZMAT3	zinc finger matrin-type 3	ZMAT3	ZMAT3	protein_coding	0.000167558	0.00115764	1.59727	0.675612	1.59727	396.185	248.038	0.00974775	0.0903829	1.38233	0.4671	1.38233	342.87	248.038	0.242861	0.453724	0.865429	-0.208512	-1.1555	342.87	396.185
DYNC2H1	dynein cytoplasmic 2 heavy chain 1	DYNC2H1	DYNC2H1	protein_coding	1.40818e-13	5.74814e-12	0.40744	-1.29534	-2.45435	411.861	1010.85	0.0365343	0.218683	0.778227	-0.361736	-1.28497	786.671	1010.85	1.14825e-07	1.90414e-06	1.91004	0.933605	1.91004	786.671	411.861
SAE1	SUMO1 activating enzyme subunit 1	SAE1	SAE1	protein_coding	0.00380485	0.0159125	1.5963	0.674733	1.5963	1229.47	770.198	0.0438262	0.242937	1.38567	0.470586	1.38567	1067.24	770.198	0.380763	0.597791	0.868052	-0.204147	-1.15201	1067.24	1229.47
TXNDC5	thioredoxin domain containing 5	TXNDC5	TXNDC5	protein_coding	0.000348861	0.00217425	0.67429	-0.568558	-1.48304	1463.78	2170.84	0.0211512	0.154322	1.28788	0.365	1.28788	2795.79	2170.84	4.2601e-09	9.15856e-08	1.90998	0.933558	1.90998	2795.79	1463.78
ESF1	ESF1 nucleolar pre-rRNA processing protein homolog	ESF1	ESF1	protein_coding	0.00047726	0.00284316	1.59561	0.674111	1.59561	627.711	393.398	0.016951	0.133565	1.37793	0.462507	1.37793	542.076	393.398	0.27147	0.487426	0.863576	-0.211604	-1.15798	542.076	627.711
KIFC3	kinesin family member C3	KIFC3	KIFC3	protein_coding	4.98679e-06	5.17703e-05	0.396058	-1.33622	-2.52488	218.72	552.242	0.164974	0.495514	0.756248	-0.403068	-1.32232	417.632	552.242	0.00149375	0.0091419	1.90944	0.933148	1.90944	417.632	218.72
NARS1	asparaginyl-tRNA synthetase 1	NARS1	NARS1	protein_coding	0.000360148	0.00223726	1.59529	0.673821	1.59529	2099.48	1316.05	0.0534279	0.272814	1.2882	0.365359	1.2882	1695.34	1316.05	0.102254	0.256976	0.807502	-0.308462	-1.23839	1695.34	2099.48
MRPL21	mitochondrial ribosomal protein L21	MRPL21	MRPL21	protein_coding	0.0142195	0.0462595	1.59466	0.673253	1.59466	1144.75	717.863	0.27943	0.630879	1.22901	0.297501	1.22901	882.263	717.863	0.171149	0.361835	0.770704	-0.375752	-1.29752	882.263	1144.75
ENSCAFG00000016250	#N/A	ENSCAFG00000016250	---	protein_coding	0.00539555	0.0212875	0.499678	-1.00093	-2.00129	23.3991	46.8284	0.837493	0.951818	0.952661	-0.0699655	-1.04969	44.6116	46.8284	0.0106152	0.0459838	1.90655	0.930963	1.90655	44.6116	23.3991
RELT	RELT TNF receptor	RELT	RELT	protein_coding	2.31318e-05	0.000201994	2.80806	1.48958	2.80806	1333.99	475.056	0.000144669	0.00348951	2.52801	1.338	2.52801	1200.95	475.056	0.665814	0.817354	0.900269	-0.151572	-1.11078	1200.95	1333.99
CEP162	centrosomal protein 162	CEP162	CEP162	protein_coding	0.00231959	0.0105796	1.59252	0.67131	1.59252	370.07	232.381	0.118973	0.41853	1.271	0.345963	1.271	295.355	232.381	0.139223	0.317079	0.798106	-0.325347	-1.25297	295.355	370.07
ENSCAFG00000004229	#N/A	ENSCAFG00000004229	---	protein_coding	3.14579e-10	7.86275e-09	0.424642	-1.23568	-2.35493	716.794	1688	0.113378	0.407256	0.807081	-0.309214	-1.23903	1362.35	1688	2.52405e-06	3.21554e-05	1.90062	0.926468	1.90062	1362.35	716.794
SUSD3	sushi domain containing 3	SUSD3	SUSD3	protein_coding	0.775218	0.864829	0.928561	-0.106932	-1.07694	19.1445	20.6174	0.0203886	0.150751	1.76277	0.817841	1.76277	36.3436	20.6174	0.0103731	0.0452044	1.89838	0.924773	1.89838	36.3436	19.1445
APPL2	adaptor protein, phosphotyrosine interacting with PH domain and leucine zipper 2	APPL2	APPL2	protein_coding	7.90144e-08	1.2459e-06	0.522409	-0.936748	-1.91421	353.797	677.242	0.943737	0.984258	0.991622	-0.0121373	-1.00845	671.568	677.242	1.27056e-07	2.08231e-06	1.89817	0.92461	1.89817	671.568	353.797
CKAP2L	cytoskeleton associated protein 2 like	CKAP2L	CKAP2L	protein_coding	0.000335196	0.00210233	0.435368	-1.19969	-2.29691	54.0888	124.237	0.395811	0.726584	0.825392	-0.276848	-1.21155	102.544	124.237	0.00631049	0.0303048	1.89585	0.922845	1.89585	102.544	54.0888
NOP16	NOP16 nucleolar protein	NOP16	NOP16	protein_coding	0.0030185	0.0131708	1.58879	0.667928	1.58879	610.89	384.5	0.341454	0.684619	1.16102	0.21539	1.16102	446.412	384.5	0.0445959	0.141024	0.730756	-0.452538	-1.36845	446.412	610.89
TRIM62	tripartite motif containing 62	TRIM62	TRIM62	protein_coding	0.965944	0.979869	1.00714	0.0102578	1.00714	615.548	611.187	9.67061e-05	0.002527	1.90888	0.932725	1.90888	1166.68	611.187	0.000117005	0.000998958	1.89535	0.922467	1.89535	1166.68	615.548
AMOTL1	angiomotin like 1	AMOTL1	AMOTL1	protein_coding	4.99716e-07	6.61034e-06	0.509375	-0.973201	-1.96319	187.728	368.546	0.788712	0.933708	0.965429	-0.0507575	-1.03581	355.805	368.546	2.15267e-06	2.78633e-05	1.89532	0.922443	1.89532	355.805	187.728
ARHGAP31	Rho GTPase activating protein 31	ARHGAP31	ARHGAP31	protein_coding	0.0878095	0.19023	0.712459	-0.489121	-1.40359	7922.23	11119.6	0.130685	0.43962	1.35	0.432957	1.35	15011.4	11119.6	0.00129005	0.00805875	1.89484	0.922078	1.89484	15011.4	7922.23
ENSCAFG00000016095	#N/A	ENSCAFG00000016095	---	protein_coding	1.65835e-17	1.11012e-15	0.40993	-1.28655	-2.43944	1606.73	3919.52	0.0152552	0.123558	0.776471	-0.364996	-1.28788	3043.4	3919.52	1.13986e-09	2.68832e-08	1.89416	0.921556	1.89416	3043.4	1606.73
METAP1	methionyl aminopeptidase 1	METAP1	METAP1	protein_coding	0.0125545	0.0420425	1.58737	0.666641	1.58737	457.864	288.442	0.980342	0.994982	1.00461	0.00663006	1.00461	289.77	288.442	0.0137363	0.0564162	0.632874	-0.660011	-1.58009	289.77	457.864
ILF3	interleukin enhancer binding factor 3	ILF3	ILF3	protein_coding	0.000142962	0.00100996	1.58671	0.666035	1.58671	3302.5	2081.36	0.183811	0.525061	1.17539	0.233137	1.17539	2446.4	2081.36	0.0134507	0.0554963	0.740772	-0.432898	-1.34994	2446.4	3302.5
NIBAN2	niban apoptosis regulator 2	NIBAN2	NIBAN2	protein_coding	4.4631e-11	1.28286e-09	0.388331	-1.36464	-2.57512	1849.06	4761.55	0.0318154	0.199889	0.735197	-0.443797	-1.36018	3500.68	4761.55	8.94132e-06	0.000101701	1.89322	0.920846	1.89322	3500.68	1849.06
HEATR3	HEAT repeat containing 3	HEATR3	HEATR3	protein_coding	0.00129414	0.00648337	1.58547	0.664912	1.58547	528.952	333.625	0.0622632	0.297453	1.30781	0.387154	1.30781	436.318	333.625	0.178124	0.371665	0.824872	-0.277758	-1.21231	436.318	528.952
NAB2	NGFI-A binding protein 2	NAB2	NAB2	protein_coding	0.049483	0.122926	0.781337	-0.355982	-1.27986	613.299	784.935	0.00169705	0.0252853	1.4789	0.56452	1.4789	1160.84	784.935	3.55817e-07	5.377e-06	1.89277	0.920502	1.89277	1160.84	613.299
MAD2L2	mitotic arrest deficient 2 like 2	MAD2L2	MAD2L2	protein_coding	0.000634279	0.00358993	1.58425	0.663796	1.58425	613.229	387.08	0.0177885	0.137264	1.37759	0.462143	1.37759	533.236	387.08	0.297927	0.515647	0.869554	-0.201653	-1.15002	533.236	613.229
HSPB6	heat shock protein family B (small) member 6	HSPB6	HSPB6	protein_coding	0.0190555	0.0581527	0.576067	-0.795693	-1.73591	53.3098	92.541	0.709553	0.904561	1.0892	0.12327	1.0892	100.796	92.541	0.00693575	0.0327266	1.89076	0.918963	1.89076	100.796	53.3098
JADE1	jade family PHD finger 1	JADE1	JADE1	protein_coding	0.00698556	0.0262472	1.58394	0.663519	1.58394	276.49	174.558	0.780185	0.931107	1.04938	0.0695412	1.04938	183.178	174.558	0.016178	0.0643073	0.662514	-0.593977	-1.5094	183.178	276.49
ENSCAFG00000018353	#N/A	ENSCAFG00000018353	---	protein_coding	4.19198e-05	0.000342027	1.58304	0.662697	1.58304	988.521	624.445	0.106775	0.394529	1.19947	0.262397	1.19947	749.003	624.445	0.0133333	0.0551769	0.7577	-0.4003	-1.31978	749.003	988.521
DMAC1	distal membrane arm assembly component 1	DMAC1	DMAC1	protein_coding	0.000281172	0.00180046	1.58275	0.662437	1.58275	660.491	417.305	0.141454	0.459749	1.20577	0.269952	1.20577	503.173	417.305	0.0313672	0.107682	0.761816	-0.392485	-1.31265	503.173	660.491
NBEAL1	neurobeachin like 1	NBEAL1	NBEAL1	protein_coding	6.26152e-08	1.01159e-06	0.458146	-1.12612	-2.18271	315.822	689.348	0.311926	0.658854	0.865677	-0.208099	-1.15516	596.753	689.348	1.11537e-05	0.000123804	1.88952	0.918021	1.88952	596.753	315.822
NEMP1	nuclear envelope integral membrane protein 1	NEMP1	NEMP1	protein_coding	0.00183752	0.00866743	0.60111	-0.734299	-1.66359	318.142	529.257	0.433905	0.754358	1.13514	0.182869	1.13514	600.781	529.257	0.000100752	0.000867711	1.8884	0.917168	1.8884	600.781	318.142
MAP3K15	mitogen-activated protein kinase kinase kinase 15	MAP3K15	MAP3K15	protein_coding	0.00340229	0.0145105	1.58202	0.661766	1.58202	878.524	555.319	0.581711	0.847441	1.09052	0.125021	1.09052	605.588	555.319	0.0176474	0.0689495	0.689324	-0.536745	-1.4507	605.588	878.524
ARHGAP33	Rho GTPase activating protein 33	ARHGAP33	ARHGAP33	protein_coding	6.27673e-07	8.07084e-06	0.436598	-1.19562	-2.29044	68.9124	157.839	0.224551	0.569983	0.823492	-0.280174	-1.21434	129.98	157.839	0.00017194	0.00140787	1.88616	0.915448	1.88616	129.98	68.9124
THOC6	THO complex 6	THOC6	THOC6	protein_coding	0.0135102	0.0444762	1.58161	0.661395	1.58161	779.763	493.018	0.184875	0.526136	1.27967	0.355776	1.27967	630.902	493.018	0.253445	0.46565	0.809095	-0.305619	-1.23595	630.902	779.763
DYRK2	dual specificity tyrosine phosphorylation regulated kinase 2	DYRK2	DYRK2	protein_coding	0.0924715	0.198018	0.726691	-0.460586	-1.3761	597.668	822.451	0.0955453	0.373296	1.37056	0.45477	1.37056	1127.22	822.451	0.000820332	0.00547562	1.88604	0.915357	1.88604	1127.22	597.668
ENSCAFG00000004842	#N/A	ENSCAFG00000004842	---	protein_coding	0.000343127	0.0021431	1.5801	0.660012	1.5801	1894.86	1199.2	0.00580119	0.0637598	1.42318	0.509115	1.42318	1706.68	1199.2	0.412445	0.626003	0.90069	-0.150897	-1.11026	1706.68	1894.86
CSF1R	colony stimulating factor 1 receptor	CSF1R	CSF1R	protein_coding	9.83632e-12	3.0497e-10	0.444132	-1.17094	-2.25158	28337.5	63804.2	0.133325	0.444819	0.836202	-0.258077	-1.19588	53353.2	63804.2	1.10807e-07	1.84194e-06	1.88278	0.912863	1.88278	53353.2	28337.5
FAHD1	fumarylacetoacetate hydrolase domain containing 1	FAHD1	FAHD1	protein_coding	0.000160601	0.0011174	1.5797	0.659647	1.5797	611.752	387.259	0.0433971	0.241334	1.27919	0.355227	1.27919	495.377	387.259	0.0810209	0.218585	0.809768	-0.304419	-1.23492	495.377	611.752
ENSCAFG00000048499	#N/A	ENSCAFG00000048499	---	protein_coding	0.00888687	0.0319136	1.57953	0.659492	1.57953	383.111	242.548	0.0187789	0.142202	1.50883	0.593433	1.50883	365.964	242.548	0.792397	0.894762	0.955244	-0.0660594	-1.04685	365.964	383.111
HAUS7	HAUS augmin like complex subunit 7	HAUS7	HAUS7	protein_coding	0.269066	0.429963	0.849456	-0.23539	-1.17722	103.738	122.123	0.00102742	0.0168954	1.59838	0.676607	1.59838	195.199	122.123	1.38982e-05	0.000151225	1.88165	0.911997	1.88165	195.199	103.738
SRP72	signal recognition particle 72	SRP72	SRP72	protein_coding	0.00176984	0.00842308	1.57929	0.659278	1.57929	3161.61	2001.92	0.128307	0.435519	1.24919	0.320993	1.24919	2500.77	2001.92	0.108617	0.268181	0.790981	-0.338285	-1.26425	2500.77	3161.61
SLC66A3	solute carrier family 66 member 3	SLC66A3	SLC66A3	protein_coding	0.000199358	0.00134107	0.618072	-0.694152	-1.61793	648.34	1048.97	0.239909	0.586773	1.16299	0.217842	1.16299	1219.94	1048.97	1.03014e-06	1.42413e-05	1.88164	0.911994	1.88164	1219.94	648.34
MORN4	MORN repeat containing 4	MORN4	MORN4	protein_coding	1.78774e-05	0.000160582	1.57831	0.658385	1.57831	347.141	219.944	0.010539	0.0959514	1.31708	0.397348	1.31708	289.685	219.944	0.0870875	0.230181	0.834488	-0.261037	-1.19834	289.685	347.141
PLEKHA6	pleckstrin homology domain containing A6	PLEKHA6	PLEKHA6	protein_coding	3.24422e-05	0.000273764	0.473971	-1.07713	-2.10983	144.009	303.835	0.517042	0.809261	0.891733	-0.165316	-1.12141	270.94	303.835	0.00046638	0.00334615	1.88141	0.911814	1.88141	270.94	144.009
CDKN2C	cyclin dependent kinase inhibitor 2C	CDKN2C	CDKN2C	protein_coding	2.45787e-07	3.46033e-06	0.330012	-1.59941	-3.03019	52.1871	158.137	0.0219566	0.157272	0.620499	-0.6885	-1.61161	98.1237	158.137	0.00392139	0.0204241	1.88023	0.910909	1.88023	98.1237	52.1871
HSPA4	heat shock protein family A (Hsp70) member 4	HSPA4	HSPA4	protein_coding	2.48275e-05	0.000215301	1.57701	0.657187	1.57701	4117.05	2610.68	0.0346769	0.211792	1.25667	0.329608	1.25667	3280.76	2610.68	0.0355332	0.118533	0.796872	-0.32758	-1.25491	3280.76	4117.05
ENSCAFG00000010789	#N/A	ENSCAFG00000010789	---	protein_coding	0.00370391	0.0155517	1.57543	0.65575	1.57543	141.822	90.0208	0.191139	0.535072	1.2317	0.300647	1.2317	110.878	90.0208	0.115154	0.279708	0.781814	-0.355103	-1.27908	110.878	141.822
FH	fumarate hydratase	FH	FH	protein_coding	0.00102307	0.0053165	1.57536	0.65568	1.57536	1967.94	1249.2	0.0994637	0.381299	1.25652	0.329436	1.25652	1569.65	1249.2	0.102139	0.256837	0.79761	-0.326244	-1.25374	1569.65	1967.94
B4GAT1	beta-1,4-glucuronyltransferase 1	B4GAT1	B4GAT1	protein_coding	0.0201916	0.0607598	0.594817	-0.749483	-1.68119	333.638	560.909	0.618112	0.863166	1.11742	0.160165	1.11742	626.768	560.909	0.00483217	0.0242258	1.87859	0.909648	1.87859	626.768	333.638
NOP10	NOP10 ribonucleoprotein	NOP10	NOP10	protein_coding	0.00214348	0.00991071	1.57527	0.655602	1.57527	1434.33	910.528	0.0618232	0.296069	1.31904	0.399489	1.31904	1201.02	910.528	0.230136	0.438198	0.837341	-0.256113	-1.19426	1201.02	1434.33
AUH	AU RNA binding methylglutaconyl-CoA hydratase	AUH	AUH	protein_coding	0.0373638	0.0983419	0.611252	-0.710161	-1.63599	452.312	739.976	0.558911	0.833308	1.14775	0.198812	1.14775	849.309	739.976	0.00771932	0.0356915	1.87771	0.908973	1.87771	849.309	452.312
SECISBP2L	SECIS binding protein 2 like	SECISBP2L	SECISBP2L	protein_coding	0.00428873	0.0176001	1.5745	0.654896	1.5745	4090.77	2598.14	0.687612	0.894324	1.06606	0.0922878	1.06606	2769.77	2598.14	0.01417	0.0577912	0.677077	-0.562608	-1.47694	2769.77	4090.77
FBXO25	F-box protein 25	FBXO25	FBXO25	protein_coding	8.93027e-07	1.10305e-05	0.59129	-0.758063	-1.69122	529.504	895.508	0.323087	0.668111	1.11004	0.150618	1.11004	994.054	895.508	4.02485e-09	8.73128e-08	1.87733	0.908681	1.87733	994.054	529.504
ENSCAFG00000025105	#N/A	ENSCAFG00000025105	---	protein_coding	8.22718e-05	0.000622316	0.54698	-0.870441	-1.82822	838.638	1533.22	0.863878	0.960584	1.02652	0.0377581	1.02652	1573.87	1533.22	4.0333e-05	0.00038537	1.8767	0.908199	1.8767	1573.87	838.638
STIP1	stress induced phosphoprotein 1	STIP1	STIP1	protein_coding	0.000497309	0.00293929	1.57111	0.651785	1.57111	3168.38	2016.65	0.127313	0.434165	1.21904	0.285751	1.21904	2458.38	2016.65	0.0504954	0.154647	0.775913	-0.366034	-1.2888	2458.38	3168.38
HNMT	histamine N-methyltransferase	HNMT	HNMT	protein_coding	1.51743e-09	3.36052e-08	0.29619	-1.7554	-3.37621	934.911	3156.45	0.00345723	0.0432844	0.555653	-0.847745	-1.79969	1753.89	3156.45	0.00180679	0.0106988	1.876	0.907659	1.876	1753.89	934.911
BRIX1	biogenesis of ribosomes BRX1	BRIX1	BRIX1	protein_coding	3.49181e-05	0.000293044	1.56897	0.649816	1.56897	572.755	365.052	0.00728558	0.0743213	1.34168	0.42404	1.34168	489.783	365.052	0.148845	0.331307	0.855135	-0.225775	-1.16941	489.783	572.755
ENSCAFG00000016649	#N/A	ENSCAFG00000016649	---	protein_coding	0.00226758	0.0103871	1.56894	0.649793	1.56894	1332.11	849.047	0.0985029	0.379622	1.27663	0.352335	1.27663	1083.92	849.047	0.162055	0.348973	0.813685	-0.297457	-1.22898	1083.92	1332.11
XRCC5	X-ray repair cross complementing 5	XRCC5	XRCC5	protein_coding	0.00722897	0.0269708	1.56876	0.649628	1.56876	504.749	321.75	0.153076	0.476426	1.27182	0.346896	1.27182	409.208	321.75	0.210205	0.412428	0.810716	-0.302731	-1.23348	409.208	504.749
CRYL1	crystallin lambda 1	CRYL1	CRYL1	protein_coding	0.353624	0.518695	1.19094	0.252098	1.19094	182.972	153.637	1.62204e-05	0.000568004	2.23278	1.15884	2.23278	343.038	153.637	0.000724117	0.0049094	1.87481	0.906746	1.87481	343.038	182.972
ENSCAFG00000008701	#N/A	ENSCAFG00000008701	---	protein_coding	0.00013945	0.000988179	1.56781	0.648746	1.56781	1840.16	1173.72	0.136003	0.449769	1.19301	0.254603	1.19301	1400.26	1173.72	0.0206574	0.0778289	0.760941	-0.394143	-1.31416	1400.26	1840.16
GCSH	glycine cleavage system protein H	GCSH	GCSH	protein_coding	0.00533093	0.0211111	1.56779	0.648734	1.56779	623.612	397.765	0.0763851	0.332105	1.33214	0.41374	1.33214	529.876	397.765	0.312103	0.529113	0.849689	-0.234993	-1.1769	529.876	623.612
KNTC1	kinetochore associated 1	KNTC1	KNTC1	protein_coding	1.53207e-13	6.18069e-12	0.316492	-1.65976	-3.15964	71.9112	227.213	0.000469551	0.00904803	0.593324	-0.753109	-1.68542	134.811	227.213	8.61768e-05	0.000756831	1.87469	0.90665	1.87469	134.811	71.9112
UBAC2	UBA domain containing 2	UBAC2	UBAC2	protein_coding	2.20351e-07	3.14069e-06	0.583723	-0.776645	-1.71314	811.931	1390.95	0.3833	0.718426	1.09399	0.129605	1.09399	1521.7	1390.95	1.54138e-09	3.57418e-08	1.87417	0.90625	1.87417	1521.7	811.931
MRPL11	mitochondrial ribosomal protein L11	MRPL11	MRPL11	protein_coding	0.000692337	0.00385172	1.56579	0.646895	1.56579	933.789	596.368	0.163428	0.492909	1.20317	0.266842	1.20317	717.533	596.368	0.0462246	0.144847	0.76841	-0.380053	-1.30139	717.533	933.789
CCT4	chaperonin containing TCP1 subunit 4	CCT4	CCT4	protein_coding	0.001274	0.00640342	1.56542	0.646547	1.56542	3210.45	2050.86	0.0993504	0.381299	1.25791	0.331028	1.25791	2579.8	2050.86	0.115821	0.28089	0.803562	-0.315519	-1.24446	2579.8	3210.45
ENSCAFG00000031337	#N/A	ENSCAFG00000031337	---	protein_coding	0.000139152	0.000987087	0.498305	-1.0049	-2.0068	102.198	205.091	0.702189	0.90124	0.933859	-0.0987231	-1.07083	191.526	205.091	0.000639469	0.00443354	1.87407	0.906175	1.87407	191.526	102.198
HACD3	3-hydroxyacyl-CoA dehydratase 3	HACD3	HACD3	protein_coding	0.0149833	0.0482551	1.56477	0.645955	1.56477	1677.49	1072.04	0.263983	0.615129	1.22852	0.296922	1.22852	1317.02	1072.04	0.188623	0.384793	0.785111	-0.349032	-1.27371	1317.02	1677.49
IER5L	immediate early response 5 like	IER5L	IER5L	protein_coding	1.658e-11	4.97291e-10	0.282916	-1.82155	-3.53462	238.962	844.638	0.00062347	0.0114694	0.529403	-0.917563	-1.88892	447.154	844.638	0.000898715	0.00590175	1.87124	0.903991	1.87124	447.154	238.962
EXTL2	exostosin like glycosyltransferase 2	EXTL2	EXTL2	protein_coding	0.000516672	0.00302697	0.571384	-0.807467	-1.75014	361.911	633.394	0.67825	0.889643	1.06862	0.0957452	1.06862	676.855	633.394	0.000104768	0.000900614	1.87023	0.903213	1.87023	676.855	361.911
UHRF1BP1L	UHRF1 binding protein 1 like	UHRF1BP1L	UHRF1BP1L	protein_coding	0.83982	0.905402	0.974352	-0.0374857	-1.02632	2373.19	2435.66	2.96765e-06	0.000126373	1.82151	0.865134	1.82151	4436.58	2435.66	1.09946e-06	1.50787e-05	1.86946	0.902619	1.86946	4436.58	2373.19
NUDT2	nudix hydrolase 2	NUDT2	NUDT2	protein_coding	0.0011566	0.00588191	0.468097	-1.09512	-2.13631	41.2671	88.1595	0.552485	0.830772	0.874318	-0.193769	-1.14375	77.0795	88.1595	0.00818841	0.0375334	1.86782	0.901353	1.86782	77.0795	41.2671
LTA4H	leukotriene A4 hydrolase	LTA4H	LTA4H	protein_coding	1.56761e-10	4.11968e-09	0.390474	-1.3567	-2.56099	2338.53	5988.95	0.0295155	0.18976	0.726583	-0.460801	-1.37631	4351.47	5988.95	2.41746e-05	0.000245971	1.86077	0.895902	1.86077	4351.47	2338.53
MPHOSPH6	M-phase phosphoprotein 6	MPHOSPH6	MPHOSPH6	protein_coding	0.00253109	0.0113676	1.56129	0.64274	1.56129	945.393	605.52	0.0356208	0.215689	1.36426	0.448121	1.36426	826.088	605.52	0.359861	0.578942	0.873804	-0.194619	-1.14442	826.088	945.393
PSMA2	proteasome 20S subunit alpha 2	PSMA2	PSMA2	protein_coding	3.71253e-05	0.000309872	1.56119	0.642649	1.56119	1153.15	738.636	0.0793104	0.338671	1.20977	0.274729	1.20977	893.577	738.636	0.018181	0.0706999	0.774899	-0.36792	-1.29049	893.577	1153.15
ENSCAFG00000023653	#N/A	ENSCAFG00000023653	---	protein_coding	0.00681388	0.0257989	1.56116	0.642618	1.56116	143.34	91.8166	0.524638	0.813926	1.11294	0.154382	1.11294	102.187	91.8166	0.0406414	0.131257	0.712896	-0.488236	-1.40273	102.187	143.34
CCDC88C	coiled-coil domain containing 88C	CCDC88C	CCDC88C	protein_coding	0.38291	0.547576	0.836838	-0.25698	-1.19497	169.213	202.205	0.0286762	0.186731	1.55606	0.637893	1.55606	314.643	202.205	0.00227999	0.0129666	1.85945	0.894873	1.85945	314.643	169.213
USP45	ubiquitin specific peptidase 45	USP45	USP45	protein_coding	0.130482	0.256264	0.732368	-0.44936	-1.36543	64.0949	87.5174	0.123728	0.428095	1.36165	0.44536	1.36165	119.168	87.5174	0.00247609	0.013876	1.85925	0.89472	1.85925	119.168	64.0949
YARS1	tyrosyl-tRNA synthetase 1	YARS1	YARS1	protein_coding	0.000132431	0.000945298	1.56022	0.64175	1.56022	1353.31	867.385	0.0363936	0.218219	1.27667	0.352386	1.27667	1107.36	867.385	0.0845784	0.225406	0.818263	-0.289364	-1.2221	1107.36	1353.31
HCLS1	hematopoietic cell-specific Lyn substrate 1	HCLS1	HCLS1	protein_coding	0.00349679	0.014831	0.715431	-0.483115	-1.39776	9655.91	13496.6	0.0127949	0.10992	1.33016	0.411601	1.33016	17952.7	13496.6	6.35487e-08	1.10845e-06	1.85924	0.894717	1.85924	17952.7	9655.91
SCFD2	sec1 family domain containing 2	SCFD2	SCFD2	protein_coding	0.00921586	0.0328302	1.55966	0.641229	1.55966	438.43	281.107	0.163518	0.492909	1.26979	0.344585	1.26979	356.945	281.107	0.227843	0.435113	0.814144	-0.296644	-1.22828	356.945	438.43
ENSCAFG00000031062	#N/A	ENSCAFG00000031062	---	protein_coding	0.000165228	0.00114441	0.488312	-1.03412	-2.04787	46.5933	95.4171	0.592024	0.852803	0.90701	-0.14081	-1.10252	86.5442	95.4171	0.00132591	0.00824776	1.85744	0.893314	1.85744	86.5442	46.5933
ZWINT	ZW10 interacting kinetochore protein	ZWINT	ZWINT	protein_coding	0.000205789	0.00137695	0.440244	-1.18363	-2.27147	74.2398	168.633	0.352963	0.694004	0.817695	-0.290365	-1.22295	137.891	168.633	0.00547487	0.0269199	1.85737	0.893261	1.85737	137.891	74.2398
RFTN1	raftlin, lipid raft linker 1	RFTN1	RFTN1	protein_coding	3.5816e-06	3.8636e-05	0.497599	-1.00694	-2.00965	591.112	1187.93	0.595615	0.85423	0.923574	-0.114701	-1.08275	1097.14	1187.93	4.13941e-05	0.000394689	1.85606	0.892242	1.85606	1097.14	591.112
ENSCAFG00000017563	#N/A	ENSCAFG00000017563	---	protein_coding	3.05516e-05	0.000260198	0.66344	-0.591963	-1.5073	5553.29	8370.46	0.0349058	0.212965	1.23038	0.2991	1.23038	10298.8	8370.46	3.4765e-10	8.84967e-09	1.85454	0.891063	1.85454	10298.8	5553.29
XPA	XPA, DNA damage recognition and repair factor	XPA	XPA	protein_coding	0.000174783	0.00119736	0.597567	-0.742828	-1.67345	505.705	846.273	0.462181	0.772039	1.10531	0.144451	1.10531	935.394	846.273	7.49703e-06	8.75098e-05	1.84968	0.887279	1.84968	935.394	505.705
PXK	PX domain containing serine/threonine kinase like	PXK	PXK	protein_coding	1.25579e-23	1.7862e-21	0.466044	-1.10146	-2.14572	907.378	1946.98	0.0477266	0.255623	0.861737	-0.214681	-1.16045	1677.78	1946.98	1.01372e-15	5.0859e-14	1.84904	0.88678	1.84904	1677.78	907.378
HGSNAT	heparan-alpha-glucosaminide N-acetyltransferase	HGSNAT	HGSNAT	protein_coding	3.02952e-11	8.83686e-10	0.504518	-0.987023	-1.98209	1047.89	2077.01	0.493763	0.793891	0.932391	-0.100993	-1.07251	1936.58	2077.01	2.62314e-09	5.9722e-08	1.84808	0.88603	1.84808	1936.58	1047.89
DOC2B	double C2 domain beta	DOC2B	DOC2B	protein_coding	0.0104943	0.0364161	1.62315	0.698799	1.62315	80.5163	49.6049	2.80379e-06	0.000120887	2.39327	1.25898	2.39327	118.718	49.6049	0.031894	0.109071	1.47446	0.560182	1.47446	118.718	80.5163
KIF5A	kinesin family member 5A	KIF5A	KIF5A	protein_coding	3.23442e-06	3.53049e-05	0.388435	-1.36425	-2.57443	77.8752	200.484	0.0949214	0.3725	0.717686	-0.478576	-1.39337	143.885	200.484	0.00282592	0.0155212	1.84763	0.885678	1.84763	143.885	77.8752
TTC39B	tetratricopeptide repeat domain 39B	TTC39B	TTC39B	protein_coding	0.00846919	0.030653	1.55558	0.637451	1.55558	307.876	197.918	0.850813	0.955708	1.03246	0.0460874	1.03246	204.342	197.918	0.0150152	0.0606988	0.663715	-0.591364	-1.50667	204.342	307.876
ABCA5	ATP binding cassette subfamily A member 5	ABCA5	ABCA5	protein_coding	0.019746	0.0597576	0.661436	-0.596327	-1.51186	271.027	409.755	0.255892	0.60618	1.22115	0.28824	1.22115	500.372	409.755	0.000542908	0.0038295	1.84621	0.884567	1.84621	500.372	271.027
ENSCAFG00000003639	#N/A	ENSCAFG00000003639	---	protein_coding	9.1106e-08	1.41553e-06	0.333114	-1.58591	-3.00197	37.3736	112.195	0.0132677	0.112275	0.614891	-0.701598	-1.62631	68.9875	112.195	0.00379901	0.0198843	1.84589	0.884313	1.84589	68.9875	37.3736
JAK3	Janus kinase 3	JAK3	JAK3	protein_coding	0.00438514	0.0178999	1.55448	0.636432	1.55448	7222.32	4646.13	0.0404263	0.231725	1.37353	0.457893	1.37353	6381.62	4646.13	0.424059	0.635674	0.883597	-0.178539	-1.13174	6381.62	7222.32
PSMC2	proteasome 26S subunit, ATPase 2	PSMC2	PSMC2	protein_coding	8.67157e-05	0.000652354	1.55417	0.636143	1.55417	3451.94	2221.08	0.0712587	0.31931	1.22498	0.292763	1.22498	2720.79	2221.08	0.0340925	0.114978	0.788193	-0.34338	-1.26873	2720.79	3451.94
ACAD9	acyl-CoA dehydrogenase family member 9	ACAD9	ACAD9	protein_coding	0.00364101	0.0153483	1.55398	0.635964	1.55398	1139.48	733.269	0.0733568	0.324081	1.31252	0.392336	1.31252	962.428	733.269	0.264941	0.479589	0.844619	-0.243628	-1.18397	962.428	1139.48
S100A8	S100 calcium binding protein A8	S100A8	S100A8	protein_coding	1.25138e-08	2.32687e-07	0.463084	-1.11065	-2.15944	9342.44	20174.4	0.245012	0.592611	0.854581	-0.22671	-1.17016	17240.7	20174.4	5.89925e-06	7.01655e-05	1.84541	0.883945	1.84541	17240.7	9342.44
MICOS13	mitochondrial contact site and cristae organizing system subunit 13	MICOS13	MICOS13	protein_coding	7.546e-05	0.000577759	1.55341	0.635436	1.55341	1108.01	713.277	0.0345918	0.211459	1.26625	0.340558	1.26625	903.184	713.277	0.0659595	0.188415	0.815141	-0.294878	-1.22678	903.184	1108.01
FAXDC2	fatty acid hydroxylase domain containing 2	FAXDC2	FAXDC2	protein_coding	3.89215e-10	9.58929e-09	0.310675	-1.68652	-3.2188	225.231	724.975	0.00245393	0.0333191	0.570796	-0.808954	-1.75194	413.812	724.975	0.00121485	0.00765707	1.83728	0.877569	1.83728	413.812	225.231
ENSCAFG00000049086	#N/A	ENSCAFG00000049086	---	protein_coding	0.139632	0.268982	0.795595	-0.329894	-1.25692	114.542	143.97	0.0118485	0.104724	1.46167	0.547614	1.46167	210.437	143.97	7.45549e-05	0.000664922	1.8372	0.877507	1.8372	210.437	114.542
NUDT15	nudix hydrolase 15	NUDT15	NUDT15	protein_coding	0.000180522	0.00123039	1.55213	0.634248	1.55213	276.715	178.281	0.00651128	0.0688399	1.38037	0.46506	1.38037	246.094	178.281	0.313662	0.530928	0.889343	-0.169188	-1.12443	246.094	276.715
ENSCAFG00000029003	#N/A	ENSCAFG00000029003	---	protein_coding	4.53377e-05	0.000367092	1.55149	0.633656	1.55149	525.541	338.733	0.0788775	0.337868	1.21072	0.275866	1.21072	410.111	338.733	0.021212	0.0793766	0.780359	-0.35779	-1.28146	410.111	525.541
RASSF1	Ras association domain family member 1	RASSF1	RASSF1	protein_coding	0.192632	0.339041	0.806461	-0.310323	-1.23999	281.886	349.534	0.01632	0.129481	1.48131	0.56687	1.48131	517.768	349.534	0.000220805	0.00175385	1.8368	0.877194	1.8368	517.768	281.886
NTAQ1	N-terminal glutamine amidase 1	NTAQ1	NTAQ1	protein_coding	0.0155371	0.0495933	1.5502	0.632459	1.5502	139.525	90.0044	0.545173	0.82584	1.11804	0.160973	1.11804	100.629	90.0044	0.0722186	0.201049	0.721221	-0.471486	-1.38654	100.629	139.525
UPF2	UPF2 regulator of nonsense mediated mRNA decay	UPF2	UPF2	protein_coding	0.00102668	0.00532568	1.54943	0.631741	1.54943	1347.23	869.501	0.172599	0.506346	1.20011	0.263167	1.20011	1043.5	869.501	0.0554268	0.165943	0.774548	-0.368574	-1.29108	1043.5	1347.23
CCL5	C-C motif chemokine ligand 5	CCL5	CCL5	protein_coding	1.84321e-07	2.6741e-06	3.3888	1.76078	3.3888	9228.47	2723.22	0.000200651	0.00454578	2.38784	1.2557	2.38784	6502.61	2723.22	0.134495	0.310201	0.704625	-0.505072	-1.41919	6502.61	9228.47
ZNHIT6	zinc finger HIT-type containing 6	ZNHIT6	ZNHIT6	protein_coding	0.0100598	0.035227	1.54658	0.62908	1.54658	352.232	227.749	0.282578	0.63432	1.20108	0.264338	1.20108	273.546	227.749	0.135584	0.311931	0.776608	-0.364742	-1.28765	273.546	352.232
ZBTB46	zinc finger and BTB domain containing 46	ZBTB46	ZBTB46	protein_coding	0.351625	0.517166	1.28971	0.367048	1.28971	42.1186	32.6574	0.00121964	0.0192975	2.37178	1.24597	2.37178	77.456	32.6574	0.0212837	0.07956	1.839	0.878921	1.839	77.456	42.1186
SLC2A9	solute carrier family 2 member 9	SLC2A9	SLC2A9	protein_coding	7.26058e-07	9.1903e-06	0.613987	-0.703719	-1.6287	2139.31	3484.28	0.220613	0.567449	1.12771	0.173395	1.12771	3929.26	3484.28	6.69998e-10	1.64777e-08	1.8367	0.877115	1.8367	3929.26	2139.31
LRRC71	leucine rich repeat containing 71	LRRC71	LRRC71	protein_coding	6.76616e-09	1.32415e-07	0.467377	-1.09734	-2.1396	182.424	390.315	0.232418	0.580121	0.857978	-0.220988	-1.16553	334.882	390.315	4.45717e-06	5.42767e-05	1.83573	0.876354	1.83573	334.882	182.424
FMR1	FMRP translational regulator 1	FMR1	FMR1	protein_coding	0.00978218	0.0344659	1.54491	0.627522	1.54491	1778.94	1151.48	0.943053	0.984231	1.01213	0.0173887	1.01213	1165.45	1151.48	0.0120837	0.0509842	0.655136	-0.610134	-1.5264	1165.45	1778.94
LYPLAL1	lysophospholipase like 1	LYPLAL1	LYPLAL1	protein_coding	0.038218	0.100151	0.649742	-0.622061	-1.53907	86.2549	132.753	0.388911	0.721803	1.1923	0.253752	1.1923	158.281	132.753	0.00352618	0.0186544	1.83504	0.875812	1.83504	158.281	86.2549
CHKA	choline kinase alpha	CHKA	CHKA	protein_coding	0.0032541	0.0140084	1.54421	0.626866	1.54421	888.329	575.265	0.463914	0.772742	1.11473	0.156695	1.11473	641.266	575.265	0.0274454	0.0971433	0.721879	-0.470171	-1.38527	641.266	888.329
SC5D	sterol-C5-desaturase	SC5D	SC5D	protein_coding	1.20456e-05	0.00011275	1.54387	0.626549	1.54387	915.128	592.75	0.00439366	0.0519891	1.3284	0.409685	1.3284	787.407	592.75	0.128782	0.301461	0.860434	-0.216864	-1.1622	787.407	915.128
C15H4orf46	#N/A	C15H4orf46	C15H4orf46	protein_coding	4.88675e-05	0.000391991	0.524276	-0.931603	-1.90739	185.364	353.563	0.803623	0.939239	0.9618	-0.0561908	-1.03972	340.057	353.563	0.000144512	0.00120765	1.83453	0.875412	1.83453	340.057	185.364
GGA3	golgi associated, gamma adaptin ear containing, ARF binding protein 3	GGA3	GGA3	protein_coding	0.0583924	0.139747	0.752364	-0.410498	-1.32914	2470.97	3284.27	0.0328301	0.204219	1.37772	0.462283	1.37772	4524.81	3284.27	5.69272e-05	0.000522224	1.83119	0.872781	1.83119	4524.81	2470.97
CHTF18	chromosome transmission fidelity factor 18	CHTF18	CHTF18	protein_coding	0.0174661	0.0544589	0.576208	-0.795337	-1.73548	79.9552	138.761	0.814377	0.943406	1.05504	0.0772915	1.05504	146.398	138.761	0.00930493	0.0415201	1.831	0.872629	1.831	146.398	79.9552
IBTK	inhibitor of Bruton tyrosine kinase	IBTK	IBTK	protein_coding	8.25597e-05	0.000624152	1.54278	0.625534	1.54278	1097.24	711.207	0.0616344	0.29537	1.22968	0.29828	1.22968	874.556	711.207	0.0393388	0.12816	0.797052	-0.327255	-1.25462	874.556	1097.24
DNAJC3	DnaJ heat shock protein family (Hsp40) member C3	DNAJC3	DNAJC3	protein_coding	9.5387e-05	0.000713309	1.54249	0.62526	1.54249	3481.55	2257.1	0.121335	0.424136	1.18808	0.248627	1.18808	2681.61	2257.1	0.0187544	0.0722965	0.770233	-0.376633	-1.29831	2681.61	3481.55
PYROXD2	pyridine nucleotide-disulphide oxidoreductase domain 2	PYROXD2	PYROXD2	protein_coding	0.000636807	0.00359935	0.450054	-1.15183	-2.22196	35.2369	78.2949	0.386721	0.720343	0.822893	-0.281224	-1.21523	64.4283	78.2949	0.0110392	0.0474331	1.82843	0.870607	1.82843	64.4283	35.2369
RSAD1	radical S-adenosyl methionine domain containing 1	RSAD1	RSAD1	protein_coding	0.0112996	0.0385606	1.54193	0.624737	1.54193	222.46	144.274	0.0146066	0.120074	1.5196	0.603692	1.5196	219.238	144.274	0.931462	0.965743	0.985518	-0.0210453	-1.01469	219.238	222.46
CEP57	centrosomal protein 57	CEP57	CEP57	protein_coding	6.19952e-05	0.000485166	1.54182	0.624634	1.54182	1178.36	764.265	0.0204641	0.150937	1.28589	0.362767	1.28589	982.76	764.265	0.0927445	0.241283	0.834008	-0.261867	-1.19903	982.76	1178.36
CALR	calreticulin	CALR	CALR	protein_coding	0.00883137	0.0317722	1.54153	0.624358	1.54153	36143.3	23446.5	0.0918274	0.366274	1.32132	0.401985	1.32132	30980.4	23446.5	0.350999	0.570371	0.857154	-0.222374	-1.16665	30980.4	36143.3
NDUFS4	NADH:ubiquinone oxidoreductase subunit S4	NDUFS4	NDUFS4	protein_coding	0.00166149	0.00798731	1.54149	0.624329	1.54149	643.043	417.156	0.1487	0.47011	1.22105	0.288125	1.22105	509.369	417.156	0.0902237	0.236163	0.792123	-0.336204	-1.26243	509.369	643.043
WWC2	WW and C2 domain containing 2	WWC2	WWC2	protein_coding	0.00909101	0.0324692	0.64319	-0.636682	-1.55475	411.128	639.201	0.337401	0.681098	1.17508	0.23276	1.17508	751.113	639.201	0.000368549	0.0027294	1.82696	0.869442	1.82696	751.113	411.128
NDRG4	NDRG family member 4	NDRG4	NDRG4	protein_coding	3.20583e-06	3.50482e-05	0.402108	-1.31435	-2.4869	477.087	1186.46	0.113344	0.407256	0.734513	-0.445139	-1.36145	871.474	1186.46	0.00211579	0.0122145	1.82666	0.869207	1.82666	871.474	477.087
NECAP2	NECAP endocytosis associated 2	NECAP2	NECAP2	protein_coding	0.366863	0.531793	1.08927	0.123367	1.08927	3443.15	3160.95	3.62478e-13	5.37753e-11	1.9885	0.991683	1.9885	6285.57	3160.95	1.96316e-10	5.1988e-09	1.82553	0.868316	1.82553	6285.57	3443.15
AP1S2	adaptor related protein complex 1 subunit sigma 2	AP1S2	AP1S2	protein_coding	1.0807e-07	1.64574e-06	0.538359	-0.893359	-1.8575	547.534	1017.04	0.879277	0.966828	0.982615	-0.0253016	-1.01769	999.36	1017.04	2.60809e-07	4.04767e-06	1.8252	0.868057	1.8252	999.36	547.534
IL2RA	interleukin 2 receptor subunit alpha	IL2RA	IL2RA	protein_coding	0.00225333	0.0103321	2.03559	1.02545	2.03559	805.366	395.643	0.000254543	0.00551322	2.34178	1.2276	2.34178	926.507	395.643	0.54564	0.734005	1.15042	0.202158	1.15042	926.507	805.366
ECI1	enoyl-CoA delta isomerase 1	ECI1	ECI1	protein_coding	1.26754e-07	1.90297e-06	0.469928	-1.08949	-2.12798	344.73	733.581	0.277889	0.629889	0.857651	-0.221537	-1.16598	629.156	733.581	2.76015e-05	0.000276757	1.82507	0.86795	1.82507	629.156	344.73
ENSCAFG00000006734	#N/A	ENSCAFG00000006734	---	protein_coding	0.00116162	0.00589658	1.53881	0.621815	1.53881	2244.05	1458.3	0.0589282	0.288207	1.28523	0.362021	1.28523	1874.24	1458.3	0.174578	0.366742	0.835207	-0.259794	-1.19731	1874.24	2244.05
PABPC4	poly(A) binding protein cytoplasmic 4	PABPC4	PABPC4	protein_coding	0.00604427	0.0234184	1.5385	0.621527	1.5385	1892.74	1230.25	0.247423	0.59533	1.19932	0.262213	1.19932	1475.46	1230.25	0.112477	0.275198	0.779536	-0.359313	-1.28282	1475.46	1892.74
ENSCAFG00000002903	#N/A	ENSCAFG00000002903	---	protein_coding	0.000782408	0.00426002	1.53806	0.621114	1.53806	1388.27	902.611	0.132256	0.443006	1.21344	0.279098	1.21344	1095.26	902.611	0.0643309	0.185391	0.788938	-0.342017	-1.26753	1095.26	1388.27
RASSF2	Ras association domain family member 2	RASSF2	RASSF2	protein_coding	4.44847e-20	4.1752e-18	0.491009	-1.02618	-2.03662	1079.58	2198.7	0.152053	0.474662	0.896001	-0.158428	-1.11607	1970.04	2198.7	1.07169e-14	4.73915e-13	1.82481	0.86775	1.82481	1970.04	1079.58
PORCN	porcupine O-acyltransferase	PORCN	PORCN	protein_coding	3.22855e-05	0.00027311	1.53695	0.620066	1.53695	1119.43	728.348	0.00456612	0.0534029	1.34208	0.424473	1.34208	977.503	728.348	0.188838	0.384793	0.873214	-0.195594	-1.1452	977.503	1119.43
PA2G4	proliferation-associated 2G4	PA2G4	PA2G4	protein_coding	0.0104231	0.0362235	1.53637	0.619529	1.53637	2694.91	1754.07	0.236135	0.58313	1.2199	0.286766	1.2199	2139.8	1754.07	0.168849	0.358622	0.794014	-0.332763	-1.25942	2139.8	2694.91
EIF4E	eukaryotic translation initiation factor 4E	EIF4E	EIF4E	protein_coding	0.00196368	0.00919336	1.53581	0.619004	1.53581	1183.04	770.3	0.159186	0.485503	1.2161	0.282259	1.2161	936.76	770.3	0.0921117	0.240058	0.791826	-0.336745	-1.2629	936.76	1183.04
PLAUR	plasminogen activator, urokinase receptor	PLAUR	PLAUR	protein_coding	8.31782e-08	1.3041e-06	0.476735	-1.06874	-2.0976	5414.45	11357.4	0.309832	0.657804	0.869137	-0.202345	-1.15057	9871.09	11357.4	1.39775e-05	0.00015161	1.8231	0.866396	1.8231	9871.09	5414.45
SPATA21	spermatogenesis associated 21	SPATA21	SPATA21	protein_coding	0.0312819	0.0859412	0.618959	-0.692085	-1.61562	75.9977	122.783	0.581031	0.847319	1.12826	0.174099	1.12826	138.531	122.783	0.00711996	0.0334016	1.82284	0.866184	1.82284	138.531	75.9977
ETFB	electron transfer flavoprotein subunit beta	ETFB	ETFB	protein_coding	0.0250609	0.0720346	0.782271	-0.35426	-1.27833	727.482	929.962	0.00110565	0.0178475	1.42578	0.511748	1.42578	1325.92	929.962	4.05224e-08	7.31932e-07	1.82261	0.866008	1.82261	1325.92	727.482
DDIT4	DNA damage inducible transcript 4	DDIT4	DDIT4	protein_coding	7.80475e-15	3.81852e-13	0.228265	-2.13122	-4.38088	584.424	2560.29	3.34777e-06	0.000142121	0.414491	-1.27059	-2.4126	1061.21	2560.29	0.00175617	0.0104641	1.81583	0.86063	1.81583	1061.21	584.424
ORC4	origin recognition complex subunit 4	ORC4	ORC4	protein_coding	0.000811966	0.00439321	1.5344	0.617671	1.5344	915.85	596.88	0.0740952	0.325986	1.25754	0.330607	1.25754	750.601	596.88	0.11935	0.286777	0.819568	-0.287064	-1.22015	750.601	915.85
GATB	glutamyl-tRNA amidotransferase subunit B	GATB	GATB	protein_coding	0.0130918	0.0433575	1.53387	0.61718	1.53387	248.992	162.329	0.58585	0.850034	1.09967	0.137069	1.09967	178.508	162.329	0.0542304	0.163188	0.716923	-0.48011	-1.39485	178.508	248.992
EXOSC6	exosome component 6	EXOSC6	EXOSC6	protein_coding	3.9871e-05	0.000327831	1.53368	0.617001	1.53368	239.524	156.176	0.0350142	0.213191	1.25093	0.323006	1.25093	195.366	156.176	0.0492144	0.151768	0.81564	-0.293995	-1.22603	195.366	239.524
UTP25	UTP25 small subunit processor component	UTP25	UTP25	protein_coding	5.62958e-06	5.75343e-05	1.53363	0.616955	1.53363	913.273	595.496	0.0063931	0.0680552	1.29478	0.372704	1.29478	771.034	595.496	0.0716436	0.199811	0.844254	-0.244251	-1.18448	771.034	913.273
DOC2A	double C2 domain alpha	DOC2A	DOC2A	protein_coding	0.0121097	0.0408154	1.53346	0.616793	1.53346	76.4858	49.8778	0.223802	0.569816	1.23661	0.306386	1.23661	61.6792	49.8778	0.204685	0.405637	0.806414	-0.310407	-1.24006	61.6792	76.4858
EPS15	epidermal growth factor receptor pathway substrate 15	EPS15	EPS15	protein_coding	0.00175341	0.00836218	0.73662	-0.441007	-1.35755	3656.65	4964.09	0.00285837	0.0375589	1.33749	0.419531	1.33749	6639.43	4964.09	1.01244e-09	2.40838e-08	1.81572	0.860538	1.81572	6639.43	3656.65
FXN	frataxin	FXN	FXN	protein_coding	0.00814193	0.0296553	1.96128	0.971795	1.96128	203.907	103.966	0.000845714	0.0145672	2.33629	1.22422	2.33629	242.895	103.966	0.487036	0.688347	1.1912	0.252421	1.1912	242.895	203.907
SESN3	sestrin 3	SESN3	SESN3	protein_coding	0.00956564	0.0338751	0.67448	-0.568152	-1.48262	1700.84	2521.71	0.18191	0.521575	1.22449	0.292185	1.22449	3087.82	2521.71	8.71518e-05	0.000762965	1.81546	0.860337	1.81546	3087.82	1700.84
FUT11	fucosyltransferase 11	FUT11	FUT11	protein_coding	0.000490317	0.00290839	0.573512	-0.802105	-1.74364	952.106	1660.13	0.800269	0.938407	1.04106	0.0580473	1.04106	1728.29	1660.13	0.000186817	0.00151531	1.81523	0.860152	1.81523	1728.29	952.106
BLOC1S5	biogenesis of lysosomal organelles complex 1 subunit 5	BLOC1S5	BLOC1S5	protein_coding	0.179722	0.322615	1.12569	0.17081	1.12569	1199.27	1065.36	3.46727e-16	7.84227e-14	2.04334	1.03093	2.04334	2176.9	1065.36	9.97725e-12	3.13567e-10	1.81519	0.860118	1.81519	2176.9	1199.27
UBFD1	ubiquitin family domain containing 1	UBFD1	UBFD1	protein_coding	6.98526e-06	6.98375e-05	1.53119	0.614652	1.53119	1131.37	738.884	0.0474475	0.25482	1.20811	0.27275	1.20811	892.652	738.884	0.0124006	0.0521117	0.789	-0.341902	-1.26743	892.652	1131.37
CHMP4A	charged multivesicular body protein 4A	CHMP4A	CHMP4A	protein_coding	0.000220966	0.00146219	1.53011	0.613631	1.53011	1088.1	711.127	0.065598	0.30557	1.23718	0.307056	1.23718	879.793	711.127	0.0648283	0.186263	0.808559	-0.306575	-1.23677	879.793	1088.1
TASOR	transcription activation suppressor	TASOR	TASOR	protein_coding	0.000336699	0.00210964	0.752659	-0.409931	-1.32862	3049.33	4051.41	7.81165e-05	0.00213844	1.36607	0.450034	1.36607	5534.52	4051.41	5.23116e-14	2.13534e-12	1.81499	0.859965	1.81499	5534.52	3049.33
ATP5F1C	ATP synthase F1 subunit gamma	ATP5F1C	ATP5F1C	protein_coding	1.27179e-06	1.52766e-05	1.52954	0.613094	1.52954	3186.81	2083.51	0.00953455	0.0890644	1.25596	0.328789	1.25596	2616.81	2083.51	0.0246143	0.089158	0.821137	-0.284305	-1.21782	2616.81	3186.81
ALYREF	Aly/REF export factor	ALYREF	ALYREF	protein_coding	0.000153504	0.00107289	1.52916	0.612738	1.52916	939.163	614.17	0.153224	0.476619	1.17488	0.232516	1.17488	721.577	614.17	0.0188689	0.0725973	0.768319	-0.380222	-1.30154	721.577	939.163
PTGR1	prostaglandin reductase 1	PTGR1	PTGR1	protein_coding	0.00235942	0.01074	0.666837	-0.584594	-1.49962	16148.7	24216.9	0.152097	0.474662	1.21021	0.275262	1.21021	29307.6	24216.9	7.73098e-06	8.97848e-05	1.81486	0.859857	1.81486	29307.6	16148.7
DMXL1	Dmx like 1	DMXL1	DMXL1	protein_coding	0.0472354	0.1186	1.19728	0.259762	1.19728	3523.79	2943.16	1.17587e-17	3.00435e-15	2.16984	1.11759	2.16984	6386.19	2943.16	5.02077e-11	1.44316e-09	1.81231	0.857827	1.81231	6386.19	3523.79
ZSCAN1	zinc finger and SCAN domain containing 1	ZSCAN1	ZSCAN1	protein_coding	0.00364379	0.0153553	0.548162	-0.867326	-1.82428	51.8368	94.5648	0.973095	0.992111	0.993267	-0.00974631	-1.00678	93.9281	94.5648	0.00432572	0.0221866	1.812	0.857579	1.812	93.9281	51.8368
RFESD	Rieske Fe-S domain containing	RFESD	RFESD	protein_coding	0.0862123	0.187436	0.721056	-0.471816	-1.38685	54.3333	75.3523	0.146879	0.468401	1.30576	0.384891	1.30576	98.3921	75.3523	0.00174422	0.0103997	1.8109	0.856707	1.8109	98.3921	54.3333
ARF5	ADP ribosylation factor 5	ARF5	ARF5	protein_coding	0.00048422	0.00287871	0.670524	-0.576638	-1.49137	393.166	586.356	0.089103	0.360726	1.21187	0.277235	1.21187	710.587	586.356	2.36556e-07	3.70462e-06	1.80735	0.853873	1.80735	710.587	393.166
SLIRP	SRA stem-loop interacting RNA binding protein	SLIRP	SLIRP	protein_coding	0.00113398	0.00579033	1.52716	0.610848	1.52716	898.86	588.584	0.0436084	0.242021	1.30116	0.379794	1.30116	765.84	588.584	0.217676	0.422759	0.852013	-0.231053	-1.17369	765.84	898.86
NDUFS6	NADH:ubiquinone oxidoreductase subunit S6	NDUFS6	NDUFS6	protein_coding	0.00161823	0.00781201	1.52593	0.609688	1.52593	1627.12	1066.32	0.0926686	0.367791	1.25334	0.325773	1.25334	1336.45	1066.32	0.141936	0.321294	0.821359	-0.283916	-1.21749	1336.45	1627.12
PRPF19	pre-mRNA processing factor 19	PRPF19	PRPF19	protein_coding	1.07377e-05	0.000102312	1.52581	0.60958	1.52581	3469.79	2274.06	0.0226156	0.15985	1.2451	0.316258	1.2451	2831.42	2274.06	0.0341139	0.114995	0.816021	-0.293322	-1.22546	2831.42	3469.79
ALDH6A1	aldehyde dehydrogenase 6 family member A1	ALDH6A1	ALDH6A1	protein_coding	0.0404629	0.10478	0.735674	-0.442861	-1.3593	511.119	694.763	0.0560316	0.279894	1.32919	0.410542	1.32919	923.468	694.763	7.74545e-05	0.000688113	1.80676	0.853403	1.80676	923.468	511.119
MVD	mevalonate diphosphate decarboxylase	MVD	MVD	protein_coding	0.014745	0.0475765	1.52571	0.609479	1.52571	2359.8	1546.69	0.103216	0.388859	1.32637	0.407487	1.32637	2051.49	1546.69	0.41883	0.631679	0.869349	-0.201992	-1.15029	2051.49	2359.8
PCNA	proliferating cell nuclear antigen	PCNA	PCNA	protein_coding	6.92259e-05	0.000534177	0.710869	-0.492345	-1.40673	1224.64	1722.74	0.00328384	0.04149	1.28433	0.361016	1.28433	2212.57	1722.74	5.14411e-12	1.66214e-10	1.8067	0.853361	1.8067	2212.57	1224.64
IL17RA	interleukin 17 receptor A	IL17RA	IL17RA	protein_coding	0.000199577	0.00134189	0.597815	-0.742228	-1.67276	14427.4	24133.6	0.579623	0.845981	1.07961	0.110506	1.07961	26054.8	24133.6	1.9275e-05	0.000200405	1.80592	0.852734	1.80592	26054.8	14427.4
UBE2S	ubiquitin conjugating enzyme E2 S	UBE2S	UBE2S	protein_coding	0.00392016	0.0163157	1.52521	0.609006	1.52521	1145.22	750.859	0.289351	0.640219	1.16823	0.224329	1.16823	877.178	750.859	0.0685189	0.193285	0.76595	-0.384677	-1.30557	877.178	1145.22
CNTROB	centrobin, centriole duplication and spindle assembly protein	CNTROB	CNTROB	protein_coding	2.8138e-10	7.09725e-09	0.470861	-1.08663	-2.12377	295.223	626.986	0.162957	0.491767	0.848863	-0.236396	-1.17805	532.225	626.986	9.46578e-07	1.32186e-05	1.80279	0.85023	1.80279	532.225	295.223
AMBRA1	autophagy and beclin 1 regulator 1	AMBRA1	AMBRA1	protein_coding	8.04324e-10	1.85884e-08	0.577561	-0.791954	-1.73142	1185.56	2052.7	0.651356	0.88002	1.04089	0.0578233	1.04089	2136.64	2052.7	4.59953e-11	1.33039e-09	1.80222	0.849778	1.80222	2136.64	1185.56
PDCL3	phosducin like 3	PDCL3	PDCL3	protein_coding	0.000558946	0.00323616	1.52468	0.608503	1.52468	918.525	602.439	0.1075	0.395619	1.21844	0.285037	1.21844	734.037	602.439	0.066514	0.189528	0.799148	-0.323466	-1.25133	734.037	918.525
EVL	Enah/Vasp-like	EVL	EVL	protein_coding	0.51825	0.670068	0.869482	-0.201772	-1.15011	360.341	414.431	0.0376646	0.222679	1.56543	0.646559	1.56543	648.763	414.431	0.00650477	0.0310004	1.80042	0.848331	1.80042	648.763	360.341
VSTM4	V-set and transmembrane domain containing 4	VSTM4	VSTM4	protein_coding	1.57284e-11	4.72778e-10	0.269317	-1.89262	-3.7131	387.604	1439.21	0.000184242	0.00422198	0.484627	-1.04505	-2.06344	697.481	1439.21	0.00264063	0.0146443	1.79947	0.84757	1.79947	697.481	387.604
MRPL1	mitochondrial ribosomal protein L1	MRPL1	MRPL1	protein_coding	0.00735624	0.0273348	1.52431	0.608152	1.52431	540.532	354.609	0.219568	0.566134	1.21403	0.279803	1.21403	430.505	354.609	0.147761	0.330094	0.796447	-0.328349	-1.25558	430.505	540.532
TREX2	three prime repair exonuclease 2	TREX2	TREX2	protein_coding	0.385592	0.550043	1.19885	0.261656	1.19885	813.344	678.434	0.000230289	0.00505135	2.1565	1.10869	2.1565	1463.05	678.434	0.00487609	0.0244194	1.7988	0.847037	1.7988	1463.05	813.344
TNFSF13	TNF superfamily member 13	TNFSF13	TNFSF13	protein_coding	0.0218251	0.0646182	0.779833	-0.358762	-1.28233	712.174	913.238	0.00177812	0.0262101	1.39951	0.484921	1.39951	1278.09	913.238	6.5169e-08	1.13099e-06	1.79463	0.843683	1.79463	1278.09	712.174
MED28	mediator complex subunit 28	MED28	MED28	protein_coding	0.00231828	0.0105771	1.52371	0.607586	1.52371	1232.83	809.096	0.0631618	0.299612	1.29355	0.371331	1.29355	1046.6	809.096	0.235885	0.445701	0.848946	-0.236255	-1.17793	1046.6	1232.83
VPS18	VPS18 core subunit of CORVET and HOPS complexes	VPS18	VPS18	protein_coding	5.77014e-05	0.000454918	1.52327	0.607171	1.52327	2760.44	1812.18	0.0148564	0.121502	1.29081	0.368278	1.29081	2339.18	1812.18	0.113331	0.2767	0.847395	-0.238893	-1.18009	2339.18	2760.44
ENSCAFG00000032297	#N/A	ENSCAFG00000032297	---	protein_coding	0.00171938	0.00822524	0.602312	-0.731417	-1.66027	69.958	116.149	0.618456	0.863394	1.08061	0.111844	1.08061	125.512	116.149	0.000323182	0.00244192	1.7941	0.84326	1.7941	125.512	69.958
C5AR1	complement C5a receptor 1	C5AR1	C5AR1	protein_coding	1.20945e-31	2.64869e-29	0.40849	-1.29163	-2.44804	7688.47	18821.7	4.4827e-05	0.0013416	0.732269	-0.449555	-1.36562	13782.5	18821.7	2.43172e-14	1.03232e-12	1.79262	0.842073	1.79262	13782.5	7688.47
ZMIZ1	zinc finger MIZ-type containing 1	ZMIZ1	ZMIZ1	protein_coding	2.37649e-06	2.67224e-05	0.613174	-0.705632	-1.63086	3244.54	5291.38	0.362168	0.701113	1.09886	0.136005	1.09886	5814.47	5291.38	1.84029e-08	3.54121e-07	1.79208	0.841636	1.79208	5814.47	3244.54
PSMB2	proteasome 20S subunit beta 2	PSMB2	PSMB2	protein_coding	4.27156e-05	0.000347698	1.52264	0.606575	1.52264	3020.5	1983.72	0.0836098	0.348298	1.19495	0.256948	1.19495	2370.45	1983.72	0.0183349	0.0710381	0.784787	-0.349627	-1.27423	2370.45	3020.5
ENSCAFG00000049492	#N/A	ENSCAFG00000049492	---	protein_coding	0.012791	0.0425554	0.639543	-0.644886	-1.56362	75.556	118.141	0.436732	0.756437	1.14539	0.195835	1.14539	135.317	118.141	0.00119457	0.00755755	1.79095	0.840721	1.79095	135.317	75.556
ZDHHC9	zinc finger DHHC-type palmitoyltransferase 9	ZDHHC9	ZDHHC9	protein_coding	3.62766e-13	1.3903e-11	0.53603	-0.899614	-1.86557	376.41	702.219	0.601576	0.85761	0.957247	-0.0630374	-1.04466	672.196	702.219	1.93362e-11	5.90225e-10	1.78581	0.836577	1.78581	672.196	376.41
SLC39A10	solute carrier family 39 member 10	SLC39A10	SLC39A10	protein_coding	0.097534	0.206424	0.7549	-0.405642	-1.32468	337.934	447.653	0.0765719	0.332535	1.34777	0.430576	1.34777	603.334	447.653	0.000625942	0.00435069	1.78536	0.836218	1.78536	603.334	337.934
C8H14orf93	#N/A	C8H14orf93	C8H14orf93	protein_coding	2.90016e-07	4.0255e-06	0.434403	-1.2029	-2.30201	134.334	309.238	0.110297	0.400993	0.775215	-0.367331	-1.28996	239.726	309.238	0.000418674	0.00304987	1.78455	0.835564	1.78455	239.726	134.334
ENSCAFG00000004664	#N/A	ENSCAFG00000004664	---	protein_coding	0.0016397	0.00789905	1.52095	0.604968	1.52095	305.75	201.026	0.0956458	0.373408	1.25111	0.323212	1.25111	251.506	201.026	0.141718	0.321006	0.822589	-0.281757	-1.21567	251.506	305.75
CPPED1	calcineurin like phosphoesterase domain containing 1	CPPED1	CPPED1	protein_coding	0.0811318	0.179129	0.695348	-0.524193	-1.43813	1158.39	1665.92	0.300847	0.649521	1.24017	0.310534	1.24017	2066.01	1665.92	0.00547686	0.0269199	1.78352	0.834726	1.78352	2066.01	1158.39
MLLT6	MLLT6, PHD finger containing	MLLT6	MLLT6	protein_coding	0.000561678	0.0032479	0.697549	-0.519634	-1.43359	4924.2	7059.29	0.0367153	0.219114	1.24339	0.314282	1.24339	8777.47	7059.29	3.09646e-08	5.72678e-07	1.78252	0.833916	1.78252	8777.47	4924.2
SMN	#N/A	SMN	SMN	protein_coding	4.94748e-05	0.000396402	1.52054	0.604588	1.52054	817.734	537.79	0.0108238	0.0980534	1.30274	0.38155	1.30274	700.601	537.79	0.133512	0.308793	0.856759	-0.223039	-1.16719	700.601	817.734
MYO1E	myosin IE	MYO1E	MYO1E	protein_coding	0.618199	0.750025	1.08817	0.121906	1.08817	6050.94	5560.65	9.30048e-05	0.00245351	1.93935	0.955571	1.93935	10784	5560.65	0.000650717	0.00450474	1.78221	0.833666	1.78221	10784	6050.94
PES1	pescadillo ribosomal biogenesis factor 1	PES1	PES1	protein_coding	0.00329894	0.0141528	1.51975	0.603834	1.51975	1222.72	804.552	0.141861	0.460504	1.2333	0.302528	1.2333	992.257	804.552	0.142473	0.322159	0.811518	-0.301306	-1.23226	992.257	1222.72
LAMTOR3	late endosomal/lysosomal adaptor, MAPK and MTOR activator 3	LAMTOR3	LAMTOR3	protein_coding	0.000351743	0.00218899	1.51966	0.603745	1.51966	2722.66	1791.63	0.0234253	0.163395	1.30434	0.383316	1.30434	2336.88	1791.63	0.191716	0.388354	0.85831	-0.220429	-1.16508	2336.88	2722.66
ENSCAFG00000011856	#N/A	ENSCAFG00000011856	---	protein_coding	0.010678	0.0369406	1.51924	0.603354	1.51924	182.779	120.309	0.278488	0.630111	1.19691	0.25931	1.19691	143.999	120.309	0.14537	0.326496	0.78783	-0.344043	-1.26931	143.999	182.779
CNNM2	cyclin and CBS domain divalent metal cation transport mediator 2	CNNM2	CNNM2	protein_coding	0.0115427	0.0392446	0.56445	-0.825083	-1.77164	126.367	223.877	0.979322	0.994408	1.00582	0.00837913	1.00582	225.181	223.877	0.0109258	0.0470778	1.78196	0.833463	1.78196	225.181	126.367
PHB2	prohibitin 2	PHB2	PHB2	protein_coding	0.000597643	0.00341578	1.51896	0.603083	1.51896	1892.43	1245.88	0.126225	0.432142	1.20517	0.269233	1.20517	1501.49	1245.88	0.0573859	0.170104	0.793417	-0.333849	-1.26037	1501.49	1892.43
NT5DC2	5'-nucleotidase domain containing 2	NT5DC2	NT5DC2	protein_coding	4.93657e-07	6.54274e-06	0.419164	-1.25441	-2.3857	750.057	1789.41	0.090336	0.36337	0.746805	-0.421196	-1.33904	1336.34	1789.41	0.000854147	0.00565212	1.78165	0.833218	1.78165	1336.34	750.057
ENSCAFG00000009288	#N/A	ENSCAFG00000009288	---	protein_coding	0.00381921	0.0159581	1.51842	0.602575	1.51842	527.891	347.658	0.494508	0.794462	1.10447	0.143354	1.10447	383.977	347.658	0.0277558	0.0980659	0.727379	-0.45922	-1.3748	383.977	527.891
SPAG4	sperm associated antigen 4	SPAG4	SPAG4	protein_coding	3.7671e-07	5.1257e-06	0.50877	-0.974916	-1.96553	208.075	408.976	0.448692	0.764083	0.905805	-0.142728	-1.10399	370.453	408.976	1.64863e-05	0.000176054	1.78038	0.832188	1.78038	370.453	208.075
SGSM1	small G protein signaling modulator 1	SGSM1	SGSM1	protein_coding	4.38828e-06	4.6112e-05	0.362341	-1.46458	-2.75983	59.7603	164.928	0.0421145	0.236971	0.644709	-0.63328	-1.55109	106.331	164.928	0.0102987	0.0449531	1.77929	0.831302	1.77929	106.331	59.7603
CERK	ceramide kinase	CERK	CERK	protein_coding	0.230877	0.384898	0.901488	-0.149619	-1.10928	2354.42	2611.7	4.39853e-08	2.84914e-06	1.60334	0.681082	1.60334	4187.45	2611.7	2.6584e-11	7.97345e-10	1.77855	0.830701	1.77855	4187.45	2354.42
ENSCAFG00000016129	#N/A	ENSCAFG00000016129	---	protein_coding	0.00499823	0.0199712	1.5162	0.600459	1.5162	7864.54	5187.01	0.08262	0.346477	1.29357	0.371361	1.29357	6709.78	5187.01	0.2841	0.501244	0.853168	-0.229098	-1.1721	6709.78	7864.54
SESTD1	SEC14 and spectrin domain containing 1	SESTD1	SESTD1	protein_coding	0.0223159	0.0657048	0.756775	-0.402063	-1.3214	241.87	319.606	0.0131153	0.111687	1.34572	0.428383	1.34572	430.102	319.606	2.17667e-06	2.81193e-05	1.77823	0.830446	1.77823	430.102	241.87
COMP	cartilage oligomeric matrix protein	COMP	COMP	protein_coding	1.68394e-10	4.39194e-09	0.300316	-1.73545	-3.32983	32.655	108.736	0.000398316	0.00789593	0.534027	-0.905016	-1.87256	58.0677	108.736	0.00350485	0.0185701	1.77822	0.830433	1.77822	58.0677	32.655
CYTH1	cytohesin 1	CYTH1	CYTH1	protein_coding	0.000778623	0.00424443	0.721766	-0.470397	-1.38549	3119.5	4322.04	0.00998259	0.0921886	1.28329	0.35985	1.28329	5546.44	4322.04	2.99307e-09	6.7147e-08	1.77799	0.830248	1.77799	5546.44	3119.5
IMP4	IMP U3 small nucleolar ribonucleoprotein 4	IMP4	IMP4	protein_coding	0.0112175	0.0383564	1.5153	0.599605	1.5153	1175.14	775.516	0.053968	0.274455	1.37186	0.456134	1.37186	1063.9	775.516	0.543626	0.732175	0.905338	-0.143472	-1.10456	1063.9	1175.14
CBX5	chromobox 5	CBX5	CBX5	protein_coding	0.00244497	0.011042	1.51462	0.598951	1.51462	743.143	490.648	0.391833	0.723371	1.1252	0.170186	1.1252	552.078	490.648	0.0302462	0.104484	0.742897	-0.428766	-1.34608	552.078	743.143
UNKL	unk like zinc finger	UNKL	UNKL	protein_coding	0.000472134	0.00281505	0.452627	-1.14361	-2.20933	306.325	676.772	0.335918	0.679768	0.804725	-0.313432	-1.24266	544.615	676.772	0.0113246	0.0484633	1.7779	0.830174	1.7779	544.615	306.325
CD48	CD48 molecule	CD48	CD48	protein_coding	0.00276623	0.0122365	1.51403	0.59839	1.51403	21851.6	14432.8	0.0599307	0.29156	1.29793	0.376215	1.29793	18732.8	14432.8	0.266491	0.481821	0.857272	-0.222175	-1.16649	18732.8	21851.6
FPGS	folylpolyglutamate synthase	FPGS	FPGS	protein_coding	0.00713856	0.0266998	1.51395	0.598321	1.51395	849.396	561.045	0.0818308	0.344634	1.30841	0.387814	1.30841	734.076	561.045	0.343405	0.562901	0.864233	-0.210507	-1.15709	734.076	849.396
NSDHL	NAD(P) dependent steroid dehydrogenase-like	NSDHL	NSDHL	protein_coding	0.0138488	0.0453637	1.51291	0.597326	1.51291	538.524	355.952	0.36465	0.703057	1.16553	0.220991	1.16553	414.875	355.952	0.121145	0.289707	0.770393	-0.376334	-1.29804	414.875	538.524
ANKRD28	ankyrin repeat domain 28	ANKRD28	ANKRD28	protein_coding	0.149829	0.283682	0.846689	-0.240096	-1.18107	332.178	392.326	0.000326952	0.00672273	1.50527	0.590019	1.50527	590.555	392.326	5.47506e-07	7.9599e-06	1.77783	0.830115	1.77783	590.555	332.178
ENSCAFG00000030143	#N/A	ENSCAFG00000030143	---	protein_coding	0.00156589	0.00761528	1.51248	0.596914	1.51248	843.242	557.524	0.0302405	0.19287	1.32881	0.410132	1.32881	740.842	557.524	0.321649	0.539221	0.878563	-0.186782	-1.13822	740.842	843.242
LAPTM4A	lysosomal protein transmembrane 4 alpha	LAPTM4A	LAPTM4A	protein_coding	3.87749e-06	4.1311e-05	0.438843	-1.18822	-2.27872	6330.76	14426	0.16296	0.491767	0.77978	-0.358862	-1.28241	11249.1	14426	0.0012699	0.00794597	1.7769	0.829361	1.7769	11249.1	6330.76
SLC22A4	solute carrier family 22 member 4	SLC22A4	SLC22A4	protein_coding	1.9315e-07	2.78754e-06	0.490966	-1.02631	-2.0368	127.514	259.722	0.303428	0.651883	0.872273	-0.197148	-1.14643	226.548	259.722	3.20666e-05	0.000314892	1.77665	0.829158	1.77665	226.548	127.514
SLC18B1	solute carrier family 18 member B1	SLC18B1	SLC18B1	protein_coding	1.92034e-07	2.78016e-06	0.33846	-1.56294	-2.95456	199.429	589.224	0.0136927	0.114774	0.601127	-0.734259	-1.66354	354.198	589.224	0.00605753	0.0293043	1.77606	0.828683	1.77606	354.198	199.429
C20H19orf71	#N/A	C20H19orf71	C20H19orf71	protein_coding	4.34457e-10	1.06658e-08	2.08812	1.06221	2.08812	5545.75	2655.85	6.83143e-13	9.61768e-11	2.33338	1.22242	2.33338	6197.13	2655.85	0.345501	0.564863	1.11745	0.160217	1.11745	6197.13	5545.75
ENSCAFG00000044806	#N/A	ENSCAFG00000044806	---	protein_coding	0.00729081	0.0271721	1.50899	0.593586	1.50899	281.125	186.3	0.0367694	0.219234	1.37944	0.464081	1.37944	256.989	186.3	0.55642	0.741947	0.914145	-0.129505	-1.09392	256.989	281.125
PRDX3	peroxiredoxin 3	PRDX3	PRDX3	protein_coding	0.000169351	0.00116827	1.50891	0.593506	1.50891	4632.22	3069.92	0.0284565	0.185897	1.27107	0.346047	1.27107	3902.09	3069.92	0.116772	0.28238	0.842379	-0.247458	-1.18711	3902.09	4632.22
RFK	riboflavin kinase	RFK	RFK	protein_coding	0.00973175	0.0343223	1.50832	0.592947	1.50832	638.697	423.448	0.113374	0.407256	1.2871	0.36413	1.2871	545.022	423.448	0.317972	0.535465	0.853334	-0.228817	-1.17187	545.022	638.697
ENSCAFG00000035349	#N/A	ENSCAFG00000035349	---	protein_coding	0.00032315	0.00203121	1.50832	0.592941	1.50832	408.968	271.142	0.102641	0.387663	1.20751	0.272038	1.20751	327.407	271.142	0.0515074	0.15698	0.800568	-0.320904	-1.24911	327.407	408.968
GAR1	GAR1 ribonucleoprotein	GAR1	GAR1	protein_coding	0.00141289	0.00698946	1.50786	0.592503	1.50786	574.582	381.058	0.290557	0.64103	1.14681	0.197629	1.14681	437.002	381.058	0.0335732	0.113658	0.760555	-0.394875	-1.31483	437.002	574.582
FCGR1A	Fc fragment of IgG receptor Ia	FCGR1A	FCGR1A	protein_coding	0.00019502	0.0013151	0.550042	-0.862386	-1.81804	4020.95	7310.26	0.883658	0.968401	0.976809	-0.0338519	-1.02374	7140.73	7310.26	0.000345578	0.00258285	1.77588	0.828534	1.77588	7140.73	4020.95
FBXO45	F-box protein 45	FBXO45	FBXO45	protein_coding	0.00626623	0.0241024	1.50644	0.59114	1.50644	113.334	75.2334	0.428855	0.750497	1.12964	0.175869	1.12964	84.987	75.2334	0.0559005	0.166939	0.749879	-0.415271	-1.33355	84.987	113.334
ATP5PF	ATP synthase peripheral stalk subunit F6	ATP5PF	ATP5PF	protein_coding	2.82081e-05	0.000242182	1.50637	0.591081	1.50637	1345.39	893.129	0.00554571	0.0617642	1.31285	0.392706	1.31285	1172.55	893.129	0.159239	0.345064	0.871532	-0.198374	-1.1474	1172.55	1345.39
NFKBIB	NFKB inhibitor beta	NFKBIB	NFKBIB	protein_coding	0.00771771	0.0284557	1.50607	0.590785	1.50607	3337.07	2215.75	0.0465055	0.251523	1.35815	0.441642	1.35815	3009.32	2215.75	0.50107	0.699094	0.901786	-0.149143	-1.10891	3009.32	3337.07
TRIP10	thyroid hormone receptor interactor 10	TRIP10	TRIP10	protein_coding	1.94687e-06	2.2323e-05	0.514574	-0.958549	-1.94335	496.664	965.194	0.511183	0.804745	0.91293	-0.131423	-1.09537	881.155	965.194	4.2014e-05	0.000400046	1.77415	0.827126	1.77415	881.155	496.664
ENSCAFG00000002646	#N/A	ENSCAFG00000002646	---	protein_coding	0.00376043	0.0157603	0.696866	-0.521047	-1.435	4357.28	6252.68	0.0887597	0.360472	1.23606	0.305749	1.23606	7728.69	6252.68	4.26666e-06	5.20948e-05	1.77374	0.826795	1.77374	7728.69	4357.28
EIF3B	eukaryotic translation initiation factor 3 subunit B	EIF3B	EIF3B	protein_coding	0.00381549	0.0159522	1.5039	0.588709	1.5039	3687.38	2451.88	0.17248	0.506105	1.21237	0.277834	1.21237	2972.59	2451.88	0.126569	0.29795	0.806153	-0.310875	-1.24046	2972.59	3687.38
LBR	lamin B receptor	LBR	LBR	protein_coding	1.92262e-06	2.21238e-05	0.459696	-1.12125	-2.17535	1431.46	3113.94	0.209785	0.555016	0.815179	-0.294812	-1.22672	2538.41	3113.94	0.00045399	0.00326867	1.7733	0.826435	1.7733	2538.41	1431.46
UQCRC1	ubiquinol-cytochrome c reductase core protein 1	UQCRC1	UQCRC1	protein_coding	1.22215e-05	0.000114318	1.50201	0.586898	1.50201	7357.47	4898.4	0.0432591	0.240858	1.20703	0.271465	1.20703	5912.53	4898.4	0.0187351	0.0722965	0.80361	-0.315433	-1.24439	5912.53	7357.47
FAM102B	family with sequence similarity 102 member B	FAM102B	FAM102B	protein_coding	1.63078e-17	1.09755e-15	0.593585	-0.752474	-1.68468	686.907	1157.22	0.396303	0.726714	1.05189	0.0729802	1.05189	1217.26	1157.22	1.4102e-20	1.01866e-18	1.77209	0.825454	1.77209	1217.26	686.907
SLC30A7	solute carrier family 30 member 7	SLC30A7	SLC30A7	protein_coding	0.0137125	0.0450135	1.50181	0.586701	1.50181	2310.03	1538.16	0.0955959	0.373319	1.31673	0.396962	1.31673	2025.35	1538.16	0.425244	0.636413	0.876764	-0.189739	-1.14056	2025.35	2310.03
KCNK6	potassium two pore domain channel subfamily K member 6	KCNK6	KCNK6	protein_coding	8.83718e-14	3.75159e-12	0.456527	-1.13123	-2.19045	268.601	588.358	0.0390371	0.227046	0.80888	-0.306002	-1.23628	475.911	588.358	7.41755e-08	1.2713e-06	1.77181	0.825227	1.77181	475.911	268.601
RBM8A	RNA binding motif protein 8A	RBM8A	RBM8A	protein_coding	0.000174264	0.00119499	1.49963	0.584611	1.49963	1973.45	1315.96	0.064664	0.303047	1.22131	0.28843	1.22131	1607.19	1315.96	0.0571545	0.169693	0.814405	-0.296181	-1.22789	1607.19	1973.45
FAM89B	family with sequence similarity 89 member B	FAM89B	FAM89B	protein_coding	1.8278e-05	0.000163435	0.434915	-1.20119	-2.2993	573.628	1318.94	0.176809	0.512916	0.769792	-0.377459	-1.29905	1015.31	1318.94	0.00335121	0.017852	1.76998	0.823736	1.76998	1015.31	573.628
SLC4A7	solute carrier family 4 member 7	SLC4A7	SLC4A7	protein_coding	0.59164	0.728711	0.92662	-0.10995	-1.07919	999.985	1079.17	0.000487636	0.00935731	1.6386	0.712464	1.6386	1768.34	1079.17	5.81839e-05	0.000533043	1.76836	0.822414	1.76836	1768.34	999.985
UQCC1	ubiquinol-cytochrome c reductase complex assembly factor 1	UQCC1	UQCC1	protein_coding	3.17982e-05	0.00026965	1.49841	0.583431	1.49841	634.508	423.455	0.0122296	0.106388	1.27806	0.353951	1.27806	541.199	423.455	0.100905	0.255306	0.852943	-0.229479	-1.17241	541.199	634.508
ENSCAFG00000047314	#N/A	ENSCAFG00000047314	---	protein_coding	0.00441345	0.0179836	1.49785	0.582889	1.49785	147.714	98.6176	0.308313	0.65655	1.15917	0.213091	1.15917	114.314	98.6176	0.071415	0.199416	0.773891	-0.369798	-1.29217	114.314	147.714
ENSCAFG00000032016	#N/A	ENSCAFG00000032016	---	protein_coding	0.397626	0.561576	0.857044	-0.22256	-1.1668	59.8824	69.8709	0.0184022	0.140231	1.51513	0.599441	1.51513	105.863	69.8709	0.00153069	0.00932564	1.76786	0.822001	1.76786	105.863	59.8824
MFSD12	major facilitator superfamily domain containing 12	MFSD12	MFSD12	protein_coding	4.68346e-12	1.51685e-10	2.2834	1.19118	2.2834	7916.73	3467.08	1.61767e-12	2.18814e-10	2.32463	1.217	2.32463	8059.66	3467.08	0.880692	0.941268	1.01805	0.0258138	1.01805	8059.66	7916.73
MRPS25	mitochondrial ribosomal protein S25	MRPS25	MRPS25	protein_coding	0.000931185	0.0049152	1.49654	0.581632	1.49654	1542.18	1030.5	0.127369	0.434225	1.20457	0.268522	1.20457	1241.31	1030.5	0.0747025	0.205994	0.804905	-0.313109	-1.24238	1241.31	1542.18
SERINC3	serine incorporator 3	SERINC3	SERINC3	protein_coding	4.79494e-06	4.98912e-05	0.631106	-0.664046	-1.58452	2980.35	4722.42	0.278003	0.629889	1.11509	0.157157	1.11509	5265.91	4722.42	1.56338e-08	3.05957e-07	1.76688	0.821203	1.76688	5265.91	2980.35
MPHOSPH10	M-phase phosphoprotein 10	MPHOSPH10	MPHOSPH10	protein_coding	0.00978496	0.0344659	1.49614	0.581241	1.49614	374.807	250.517	0.205655	0.550848	1.21964	0.286452	1.21964	305.539	250.517	0.189908	0.38634	0.815191	-0.294789	-1.22671	305.539	374.807
EIF2B1	eukaryotic translation initiation factor 2B subunit alpha	EIF2B1	EIF2B1	protein_coding	0.000987964	0.00517303	1.49602	0.581129	1.49602	870.306	581.748	0.0593432	0.289621	1.2604	0.333879	1.2604	733.234	581.748	0.160701	0.347088	0.842501	-0.24725	-1.18694	733.234	870.306
VASH1	vasohibin 1	VASH1	VASH1	protein_coding	0.00363464	0.0153261	0.566288	-0.820393	-1.76589	2788.53	4924.22	0.99941	0.999732	1.00014	0.000208493	1.00014	4924.94	4924.22	0.00363151	0.0191602	1.76614	0.820601	1.76614	4924.94	2788.53
UTP20	UTP20 small subunit processome component	UTP20	UTP20	protein_coding	0.0100485	0.0352074	1.49595	0.58106	1.49595	1219.58	815.252	0.28839	0.639388	1.18111	0.240143	1.18111	962.903	815.252	0.131007	0.304953	0.789539	-0.340917	-1.26656	962.903	1219.58
CEP78	centrosomal protein 78	CEP78	CEP78	protein_coding	1.56449e-06	1.83705e-05	0.463359	-1.1098	-2.15815	110.859	239.25	0.199542	0.544202	0.818184	-0.289502	-1.22222	195.751	239.25	0.000447568	0.00323304	1.76577	0.820294	1.76577	195.751	110.859
CLIC4	chloride intracellular channel 4	CLIC4	CLIC4	protein_coding	0.0223263	0.0657213	0.753218	-0.408861	-1.32764	1131.37	1502.05	0.0212872	0.154878	1.32919	0.410546	1.32919	1996.51	1502.05	4.61124e-06	5.59554e-05	1.76468	0.819407	1.76468	1996.51	1131.37
ELMO2	engulfment and cell motility 2	ELMO2	ELMO2	protein_coding	0.00228973	0.0104677	1.49475	0.579903	1.49475	1397.21	934.744	0.464194	0.77291	1.10162	0.139624	1.10162	1029.73	934.744	0.0206875	0.0778998	0.736992	-0.440279	-1.35687	1029.73	1397.21
PIK3CG	phosphatidylinositol-4,5-bisphosphate 3-kinase catalytic subunit gamma	PIK3CG	PIK3CG	protein_coding	0.281161	0.443689	0.80593	-0.311273	-1.2408	3884.63	4820.05	0.0784467	0.336596	1.42213	0.508058	1.42213	6854.76	4820.05	0.00455315	0.0230447	1.76459	0.819332	1.76459	6854.76	3884.63
CTIF	cap binding complex dependent translation initiation factor	CTIF	CTIF	protein_coding	0.000173645	0.00119193	1.49404	0.579217	1.49404	249.924	167.281	0.00516841	0.0588513	1.35293	0.436084	1.35293	226.318	167.281	0.348789	0.568487	0.90555	-0.143134	-1.1043	226.318	249.924
DCAF17	DDB1 and CUL4 associated factor 17	DCAF17	DCAF17	protein_coding	0.0219047	0.0648221	0.711526	-0.491012	-1.40543	129.03	181.342	0.116952	0.414485	1.25529	0.32802	1.25529	227.637	181.342	0.000127997	0.00108143	1.76422	0.819033	1.76422	227.637	129.03
MAK16	MAK16 homolog	MAK16	MAK16	protein_coding	0.000368852	0.00228106	1.49357	0.578766	1.49357	1203.88	806.04	0.100844	0.383819	1.20383	0.267635	1.20383	970.337	806.04	0.0555265	0.166182	0.80601	-0.311131	-1.24068	970.337	1203.88
NYAP2	neuronal tyrosine-phosphorylated phosphoinositide-3-kinase adaptor 2	NYAP2	NYAP2	protein_coding	0.000568342	0.00328216	2.01038	1.00747	2.01038	1442.47	717.513	4.52346e-05	0.00135087	2.28513	1.19227	2.28513	1639.61	717.513	0.526247	0.719343	1.13666	0.184805	1.13666	1639.61	1442.47
ATXN10	ataxin 10	ATXN10	ATXN10	protein_coding	0.00217551	0.0100319	1.49345	0.578653	1.49345	858.065	574.551	0.0110376	0.0996635	1.39537	0.480651	1.39537	801.713	574.551	0.602871	0.77577	0.934326	-0.098002	-1.07029	801.713	858.065
SETD3	SET domain containing 3, actin histidine methyltransferase	SETD3	SETD3	protein_coding	3.23372e-05	0.000273213	1.49238	0.577617	1.49238	2542.92	1703.93	0.0281217	0.184835	1.23609	0.30578	1.23609	2106.21	1703.93	0.0503832	0.154338	0.828264	-0.271837	-1.20734	2106.21	2542.92
GTF3C1	general transcription factor IIIC subunit 1	GTF3C1	GTF3C1	protein_coding	0.00016516	0.00114441	0.678987	-0.558544	-1.47278	1208.24	1779.47	0.077879	0.335547	1.19754	0.260069	1.19754	2130.98	1779.47	3.37336e-08	6.20564e-07	1.76371	0.818614	1.76371	2130.98	1208.24
RAB13	RAB13, member RAS oncogene family	RAB13	RAB13	protein_coding	1.67929e-05	0.00015173	0.582889	-0.778707	-1.71559	948.348	1626.98	0.830129	0.950144	1.02715	0.0386455	1.02715	1671.15	1626.98	6.39659e-06	7.54305e-05	1.76217	0.817353	1.76217	1671.15	948.348
ENSCAFG00000029777	#N/A	ENSCAFG00000029777	---	protein_coding	0.000204644	0.00137062	1.4919	0.577147	1.4919	2750.03	1843.31	0.0774377	0.334783	1.20993	0.274927	1.20993	2230.29	1843.31	0.0518252	0.157704	0.811004	-0.30222	-1.23304	2230.29	2750.03
HELLS	helicase, lymphoid specific	HELLS	HELLS	protein_coding	0.000565202	0.00326553	0.503876	-0.988859	-1.98461	35.7734	70.9964	0.529653	0.81677	0.887795	-0.171702	-1.12639	63.0302	70.9964	0.00513515	0.0255097	1.76193	0.817157	1.76193	63.0302	35.7734
HOMER1	homer scaffold protein 1	HOMER1	HOMER1	protein_coding	0.0856914	0.186657	0.792769	-0.335027	-1.2614	203.984	257.305	0.0118711	0.104749	1.39649	0.481802	1.39649	359.324	257.305	2.55798e-05	0.000259123	1.76153	0.81683	1.76153	359.324	203.984
PSMA7	proteasome 20S subunit alpha 7	PSMA7	PSMA7	protein_coding	0.000871092	0.00466193	1.49135	0.576615	1.49135	3221.03	2159.81	0.0518116	0.267732	1.26326	0.337157	1.26326	2728.42	2159.81	0.16669	0.355679	0.847063	-0.239459	-1.18055	2728.42	3221.03
LAMP2	lysosomal associated membrane protein 2	LAMP2	LAMP2	protein_coding	0.00509837	0.0203125	1.4912	0.576478	1.4912	37033.4	24834.6	0.0363743	0.218198	1.34794	0.430759	1.34794	33475.6	24834.6	0.478947	0.682847	0.903929	-0.145719	-1.10628	33475.6	37033.4
TPCN2	two pore segment channel 2	TPCN2	TPCN2	protein_coding	0.00678889	0.0257325	0.675574	-0.565815	-1.48022	1328.9	1967.07	0.230172	0.576947	1.18938	0.250213	1.18938	2339.6	1967.07	9.46455e-05	0.000820876	1.76055	0.816028	1.76055	2339.6	1328.9
HMGB1	high mobility group box 1	HMGB1	HMGB1	protein_coding	3.63561e-06	3.90658e-05	0.478646	-1.06297	-2.08923	3543.18	7402.5	0.280366	0.63175	0.842309	-0.247578	-1.18721	6235.2	7402.5	0.000383202	0.00282277	1.75978	0.815391	1.75978	6235.2	3543.18
WWP1	WW domain containing E3 ubiquitin protein ligase 1	WWP1	WWP1	protein_coding	5.9521e-10	1.42324e-08	0.511844	-0.966223	-1.95372	1326.89	2592.37	0.326068	0.669757	0.89963	-0.152596	-1.11157	2332.18	2592.37	1.93675e-07	3.09275e-06	1.75762	0.813627	1.75762	2332.18	1326.89
THOP1	thimet oligopeptidase 1	THOP1	THOP1	protein_coding	0.000252314	0.00163743	1.48712	0.572518	1.48712	1180.06	793.523	0.184377	0.526027	1.15558	0.20862	1.15558	916.982	793.523	0.0200745	0.0760691	0.777062	-0.363898	-1.2869	916.982	1180.06
ENSCAFG00000014991	#N/A	ENSCAFG00000014991	---	protein_coding	0.0071933	0.0268595	0.595842	-0.746999	-1.6783	339.454	569.705	0.810138	0.942815	1.04712	0.0664249	1.04712	596.549	569.705	0.00345884	0.0183474	1.75738	0.813424	1.75738	596.549	339.454
EZH1	enhancer of zeste 1 polycomb repressive complex 2 subunit	EZH1	EZH1	protein_coding	8.47868e-06	8.31417e-05	0.455691	-1.13387	-2.19447	241.8	530.623	0.198973	0.54361	0.798712	-0.324254	-1.25202	423.815	530.623	0.00155114	0.00941949	1.75275	0.80962	1.75275	423.815	241.8
ENSCAFG00000043201	#N/A	ENSCAFG00000043201	---	protein_coding	0.000695608	0.0038621	1.48689	0.5723	1.48689	1392.86	936.76	0.132747	0.443894	1.1929	0.254471	1.1929	1117.46	936.76	0.0596571	0.175424	0.802276	-0.317829	-1.24645	1117.46	1392.86
DAB2IP	DAB2 interacting protein	DAB2IP	DAB2IP	protein_coding	0.000118485	0.000858792	0.430728	-1.21515	-2.32165	224.846	522.014	0.191265	0.535072	0.752589	-0.410066	-1.32875	392.862	522.014	0.011048	0.0474333	1.74725	0.805085	1.74725	392.862	224.846
ENSCAFG00000047959	#N/A	ENSCAFG00000047959	---	protein_coding	1.11532e-11	3.43483e-10	0.491121	-1.02585	-2.03616	353.169	719.109	0.135391	0.44882	0.857518	-0.221762	-1.16616	616.649	719.109	1.27079e-07	2.08231e-06	1.74604	0.804089	1.74604	616.649	353.169
MRPS27	mitochondrial ribosomal protein S27	MRPS27	MRPS27	protein_coding	0.00105826	0.00545826	1.48604	0.571473	1.48604	574.197	386.394	0.0719823	0.320918	1.2447	0.315803	1.2447	480.947	386.394	0.142489	0.322159	0.837598	-0.25567	-1.19389	480.947	574.197
PMVK	phosphomevalonate kinase	PMVK	PMVK	protein_coding	4.49809e-09	9.07311e-08	0.520816	-0.941153	-1.92006	161.928	310.912	0.376796	0.712965	0.909296	-0.137178	-1.09975	282.711	310.912	7.43027e-07	1.05795e-05	1.7459	0.803975	1.7459	282.711	161.928
MIF4GD	MIF4G domain containing	MIF4GD	MIF4GD	protein_coding	0.0582001	0.139359	0.832373	-0.264698	-1.20138	1328.99	1596.63	0.000107539	0.00273749	1.45239	0.538431	1.45239	2318.94	1596.63	8.56027e-09	1.74713e-07	1.74488	0.803129	1.74488	2318.94	1328.99
RNF130	ring finger protein 130	RNF130	RNF130	protein_coding	3.82696e-09	7.85722e-08	0.55103	-0.859797	-1.81478	4869.49	8837.07	0.695626	0.8989	0.961249	-0.0570172	-1.04031	8494.63	8837.07	3.82865e-08	6.96979e-07	1.74446	0.80278	1.74446	8494.63	4869.49
GOT1	glutamic-oxaloacetic transaminase 1	GOT1	GOT1	protein_coding	0.000801951	0.00434755	1.48448	0.569962	1.48448	1938.54	1305.86	0.0716435	0.320514	1.23701	0.306852	1.23701	1615.36	1305.86	0.121654	0.290341	0.83329	-0.26311	-1.20006	1615.36	1938.54
PGS1	phosphatidylglycerophosphate synthase 1	PGS1	PGS1	protein_coding	0.00741721	0.0275169	1.48376	0.56926	1.48376	3988.37	2688.01	0.123365	0.427442	1.25506	0.32776	1.25506	3373.63	2688.01	0.255941	0.467959	0.845866	-0.241499	-1.18222	3373.63	3988.37
ENKD1	enkurin domain containing 1	ENKD1	ENKD1	protein_coding	0.0149277	0.0480984	0.745077	-0.424538	-1.34214	133.738	179.496	0.025068	0.171474	1.29923	0.377652	1.29923	233.206	179.496	3.80526e-06	4.69179e-05	1.74375	0.80219	1.74375	233.206	133.738
OLA1	Obg like ATPase 1	OLA1	OLA1	protein_coding	0.00179307	0.00850137	1.48212	0.567658	1.48212	1541.45	1040.03	0.0543044	0.275556	1.27497	0.350458	1.27497	1326.01	1040.03	0.231914	0.44049	0.860233	-0.2172	-1.16248	1326.01	1541.45
TRAF3IP2	TRAF3 interacting protein 2	TRAF3IP2	TRAF3IP2	protein_coding	0.0348671	0.0932833	1.75401	0.810659	1.75401	2113	1204.67	0.00232947	0.0321077	2.24952	1.16962	2.24952	2709.92	1204.67	0.349767	0.569587	1.2825	0.358957	1.2825	2709.92	2113
SSH1	slingshot protein phosphatase 1	SSH1	SSH1	protein_coding	0.00055855	0.00323616	0.613282	-0.705378	-1.63057	1503.16	2451.01	0.643652	0.875526	1.06759	0.0943516	1.06759	2616.66	2451.01	9.18912e-05	0.000801405	1.74078	0.79973	1.74078	2616.66	1503.16
PSRC1	proline and serine rich coiled-coil 1	PSRC1	PSRC1	protein_coding	9.47369e-06	9.18414e-05	0.395431	-1.3385	-2.52889	54.8235	138.642	0.0666026	0.308548	0.688061	-0.539391	-1.45336	95.3944	138.642	0.00940445	0.0418424	1.74003	0.79911	1.74003	95.3944	54.8235
COPG2	COPI coat complex subunit gamma 2	COPG2	COPG2	protein_coding	0.269207	0.430088	0.861531	-0.215025	-1.16072	897.13	1041.32	0.00258954	0.034657	1.49901	0.584014	1.49901	1560.95	1041.32	3.9178e-05	0.000375635	1.73994	0.799038	1.73994	1560.95	897.13
WDR18	WD repeat domain 18	WDR18	WDR18	protein_coding	0.00104866	0.00541681	1.48047	0.566053	1.48047	451.158	304.74	0.128875	0.436554	1.20124	0.264527	1.20124	366.067	304.74	0.0808003	0.218289	0.811393	-0.301527	-1.23245	366.067	451.158
JCAD	junctional cadherin 5 associated	JCAD	JCAD	protein_coding	7.76798e-20	7.00489e-18	0.194958	-2.35876	-5.1293	296.842	1522.6	1.25243e-09	1.06665e-07	0.338988	-1.56069	-2.94996	516.142	1522.6	0.00220599	0.0126085	1.73877	0.79807	1.73877	516.142	296.842
SLC37A4	solute carrier family 37 member 4	SLC37A4	SLC37A4	protein_coding	0.00153892	0.0075	0.649315	-0.623009	-1.54008	589.755	908.273	0.374487	0.711483	1.12792	0.17367	1.12792	1024.46	908.273	5.16999e-05	0.000479371	1.7371	0.796679	1.7371	1024.46	589.755
MYDGF	myeloid derived growth factor	MYDGF	MYDGF	protein_coding	0.00179027	0.00849259	1.47943	0.565045	1.47943	1865.67	1261.07	0.384105	0.718426	1.11563	0.157863	1.11563	1406.89	1261.07	0.0244981	0.0887839	0.754095	-0.407182	-1.32609	1406.89	1865.67
KDM4C	lysine demethylase 4C	KDM4C	KDM4C	protein_coding	0.000147496	0.00103668	1.47926	0.564873	1.47926	1819.6	1230.08	0.0272225	0.180832	1.25653	0.329448	1.25653	1545.63	1230.08	0.113497	0.277008	0.849435	-0.235424	-1.17725	1545.63	1819.6
EBNA1BP2	EBNA1 binding protein 2	EBNA1BP2	EBNA1BP2	protein_coding	0.00969508	0.0342018	1.47907	0.56469	1.47907	1399.55	946.24	0.23834	0.584993	1.19572	0.257885	1.19572	1131.44	946.24	0.159935	0.346131	0.80843	-0.306805	-1.23697	1131.44	1399.55
GPD2	glycerol-3-phosphate dehydrogenase 2	GPD2	GPD2	protein_coding	0.115646	0.233889	0.877536	-0.18847	-1.13955	2168.5	2471.13	3.52889e-07	1.88714e-05	1.52362	0.607502	1.52362	3765.06	2471.13	2.80162e-11	8.36666e-10	1.73625	0.795973	1.73625	3765.06	2168.5
GEMIN5	gem nuclear organelle associated protein 5	GEMIN5	GEMIN5	protein_coding	0.00305792	0.0133176	1.4782	0.56384	1.4782	854.784	578.261	0.256966	0.607394	1.16208	0.216707	1.16208	671.984	578.261	0.0683513	0.193019	0.786145	-0.347133	-1.27203	671.984	854.784
NRM	nurim	NRM	NRM	protein_coding	0.158074	0.294763	0.845586	-0.241977	-1.18261	1489.55	1761.56	0.0012074	0.0191478	1.46738	0.553247	1.46738	2584.89	1761.56	3.41827e-06	4.24881e-05	1.73535	0.795223	1.73535	2584.89	1489.55
KIRREL1	kirre like nephrin family adhesion molecule 1	KIRREL1	KIRREL1	protein_coding	0.0005042	0.00297284	0.572829	-0.803825	-1.74572	433.311	756.44	0.96993	0.991053	0.994015	-0.00866052	-1.00602	751.913	756.44	0.000591443	0.00414304	1.73527	0.795164	1.73527	751.913	433.311
ENSCAFG00000028453	#N/A	ENSCAFG00000028453	---	protein_coding	0.204542	0.353998	0.768768	-0.379381	-1.30078	6887.67	8959.36	0.166151	0.497998	1.33235	0.413968	1.33235	11937	8959.36	0.00797407	0.0366605	1.73309	0.793348	1.73309	11937	6887.67
NCKAP5L	NCK associated protein 5 like	NCKAP5L	NCKAP5L	protein_coding	3.40973e-15	1.73594e-13	0.391119	-1.35432	-2.55677	1002.88	2564.12	0.00102298	0.0168568	0.677263	-0.562211	-1.47653	1736.59	2564.12	4.39907e-06	5.3664e-05	1.73161	0.792111	1.73161	1736.59	1002.88
CCT3	chaperonin containing TCP1 subunit 3	CCT3	CCT3	protein_coding	0.00201403	0.00940041	1.47676	0.562437	1.47676	4109.44	2782.74	0.182317	0.522439	1.18354	0.243108	1.18354	3293.48	2782.74	0.0795546	0.215853	0.801443	-0.319329	-1.24775	3293.48	4109.44
TSKU	tsukushi, small leucine rich proteoglycan	TSKU	TSKU	protein_coding	0.0887825	0.192025	0.806485	-0.310281	-1.23995	264.453	327.909	0.0072883	0.0743213	1.39651	0.481827	1.39651	457.928	327.909	1.28452e-05	0.000140991	1.7316	0.792108	1.7316	457.928	264.453
CARD6	caspase recruitment domain family member 6	CARD6	CARD6	protein_coding	2.32199e-10	5.88907e-09	0.448022	-1.15836	-2.23203	1256.71	2805.03	0.0439466	0.243395	0.775402	-0.366983	-1.28965	2175.03	2805.03	1.54236e-05	0.000165345	1.73072	0.791376	1.73072	2175.03	1256.71
OPTN	optineurin	OPTN	OPTN	protein_coding	0.000945253	0.00498344	1.47613	0.561823	1.47613	3515.84	2381.79	0.404274	0.731778	1.10338	0.141933	1.10338	2628.03	2381.79	0.0135076	0.0556975	0.747482	-0.41989	-1.33783	2628.03	3515.84
PSMD7	proteasome 26S subunit, non-ATPase 7	PSMD7	PSMD7	protein_coding	0.0071042	0.0265988	1.47605	0.561744	1.47605	2407.02	1630.71	0.369347	0.706975	1.13885	0.187578	1.13885	1857.14	1630.71	0.0730328	0.20258	0.771552	-0.374166	-1.29609	1857.14	2407.02
ARHGAP12	Rho GTPase activating protein 12	ARHGAP12	ARHGAP12	protein_coding	0.00225756	0.010348	1.47575	0.561446	1.47575	3154.92	2137.84	0.508596	0.803416	1.08802	0.121704	1.08802	2326.01	2137.84	0.0168025	0.0662734	0.737266	-0.439743	-1.35636	2326.01	3154.92
ENSCAFG00000041618	#N/A	ENSCAFG00000041618	---	protein_coding	0.03517	0.0939841	0.667107	-0.58401	-1.49901	81.4059	122.028	0.445761	0.76183	1.1542	0.206896	1.1542	140.845	122.028	0.00438161	0.0223983	1.73016	0.790906	1.73016	140.845	81.4059
CERKL	ceramide kinase like	CERKL	CERKL	protein_coding	1.4729e-05	0.000134491	0.464927	-1.10492	-2.15088	1004.08	2159.66	0.216002	0.563148	0.803925	-0.314868	-1.2439	1736.2	2159.66	0.00197037	0.0114657	1.72914	0.790057	1.72914	1736.2	1004.08
ZNF365	zinc finger protein 365	ZNF365	ZNF365	protein_coding	6.40183e-05	0.000499299	0.505123	-0.985293	-1.97972	90.0526	178.279	0.416686	0.742602	0.873398	-0.195289	-1.14495	155.708	178.279	0.00151681	0.00926135	1.72908	0.790004	1.72908	155.708	90.0526
NOL9	nucleolar protein 9	NOL9	NOL9	protein_coding	0.00903529	0.0323037	1.47477	0.56049	1.47477	366.175	248.293	0.514196	0.808015	1.10292	0.141323	1.10292	273.847	248.293	0.0514196	0.156816	0.747857	-0.419166	-1.33715	273.847	366.175
XPNPEP3	X-prolyl aminopeptidase 3	XPNPEP3	XPNPEP3	protein_coding	0.00498486	0.0199467	1.47471	0.560435	1.47471	352.179	238.812	0.562714	0.835262	1.08437	0.116858	1.08437	258.961	238.812	0.0267545	0.0952598	0.735309	-0.443578	-1.35997	258.961	352.179
UQCRFS1	ubiquinol-cytochrome c reductase, Rieske iron-sulfur polypeptide 1	UQCRFS1	UQCRFS1	protein_coding	0.00273043	0.0121053	1.4743	0.560026	1.4743	2829.58	1919.28	0.0160221	0.128057	1.36639	0.450369	1.36639	2622.48	1919.28	0.557139	0.742547	0.926809	-0.109656	-1.07897	2622.48	2829.58
CSRNP1	cysteine and serine rich nuclear protein 1	CSRNP1	CSRNP1	protein_coding	0.0121112	0.0408154	0.657817	-0.604242	-1.52018	806.854	1226.56	0.445667	0.76183	1.13537	0.183161	1.13537	1392.6	1226.56	0.00108103	0.00693398	1.72596	0.787403	1.72596	1392.6	806.854
NICN1	nicolin 1	NICN1	NICN1	protein_coding	4.39464e-07	5.87528e-06	0.444126	-1.17096	-2.25161	290.488	654.066	0.0951256	0.372717	0.766512	-0.383619	-1.30461	501.35	654.066	0.000726739	0.00491993	1.72589	0.787341	1.72589	501.35	290.488
TMEM120B	transmembrane protein 120B	TMEM120B	TMEM120B	protein_coding	0.565598	0.70862	1.12738	0.172971	1.12738	140.679	124.784	0.00129951	0.0203051	1.94295	0.958247	1.94295	242.449	124.784	0.00836741	0.0381026	1.72342	0.785276	1.72342	242.449	140.679
CDKAL1	CDK5 regulatory subunit associated protein 1 like 1	CDKAL1	CDKAL1	protein_coding	0.000881213	0.00470697	1.47301	0.558768	1.47301	400.439	271.851	0.123768	0.428095	1.19844	0.261162	1.19844	325.798	271.851	0.0764303	0.209269	0.813601	-0.297606	-1.2291	325.798	400.439
TOB1	transducer of ERBB2, 1	TOB1	TOB1	protein_coding	5.06141e-08	8.26418e-07	0.631992	-0.662021	-1.5823	819.91	1297.34	0.309718	0.657804	1.08829	0.122062	1.08829	1411.88	1297.34	1.1711e-10	3.1744e-09	1.722	0.784083	1.722	1411.88	819.91
AGAP3	ArfGAP with GTPase domain, ankyrin repeat and PH domain 3	AGAP3	AGAP3	protein_coding	0.0948891	0.202097	0.7051	-0.504101	-1.41824	1704.15	2416.89	0.353588	0.694738	1.21399	0.279756	1.21399	2934.08	2416.89	0.00940313	0.0418424	1.72173	0.783856	1.72173	2934.08	1704.15
CAMKK2	calcium/calmodulin dependent protein kinase kinase 2	CAMKK2	CAMKK2	protein_coding	5.76837e-07	7.48695e-06	0.508996	-0.974273	-1.96465	406.03	797.707	0.320714	0.666198	0.875465	-0.191878	-1.14225	698.365	797.707	6.3593e-05	0.000577232	1.71998	0.782395	1.71998	698.365	406.03
PSMD12	proteasome 26S subunit, non-ATPase 12	PSMD12	PSMD12	protein_coding	0.000274419	0.00176183	1.47101	0.556803	1.47101	1538.63	1045.97	0.0727374	0.322791	1.21037	0.275453	1.21037	1266.02	1045.97	0.0659558	0.188415	0.822821	-0.28135	-1.21533	1266.02	1538.63
TRIM41	tripartite motif containing 41	TRIM41	TRIM41	protein_coding	1.91654e-09	4.15762e-08	0.484972	-1.04403	-2.06198	482.22	994.325	0.128734	0.436185	0.834089	-0.261726	-1.19891	829.356	994.325	7.49664e-06	8.75098e-05	1.71987	0.782302	1.71987	829.356	482.22
ENSCAFG00000013724	#N/A	ENSCAFG00000013724	---	protein_coding	3.92892e-05	0.000323625	0.508298	-0.976255	-1.96735	53.7067	105.66	0.391205	0.722842	0.873839	-0.19456	-1.14438	92.3299	105.66	0.00123272	0.00775198	1.71915	0.781695	1.71915	92.3299	53.7067
RAD23B	RAD23 homolog B, nucleotide excision repair protein	RAD23B	RAD23B	protein_coding	0.000146768	0.00103314	1.47028	0.556093	1.47028	3458.33	2352.15	0.0212753	0.154878	1.26378	0.337747	1.26378	2972.61	2352.15	0.135913	0.31248	0.85955	-0.218346	-1.1634	2972.61	3458.33
ENSCAFG00000045519	#N/A	ENSCAFG00000045519	---	protein_coding	1.19702e-06	1.44998e-05	0.402347	-1.31349	-2.48542	175.842	437.041	0.046253	0.250754	0.690839	-0.533578	-1.44752	301.925	437.041	0.00419878	0.0216401	1.71702	0.77991	1.71702	301.925	175.842
MFN2	mitofusin 2	MFN2	MFN2	protein_coding	0.003858	0.0161104	1.46913	0.554966	1.46913	3908.75	2660.58	0.0952702	0.372717	1.24886	0.320608	1.24886	3322.68	2660.58	0.222309	0.42831	0.850063	-0.234358	-1.17638	3322.68	3908.75
BCCIP	BRCA2 and CDKN1A interacting protein	BCCIP	BCCIP	protein_coding	0.00157846	0.0076629	1.46884	0.554675	1.46884	731.398	497.943	0.115863	0.412124	1.21195	0.277328	1.21195	603.482	497.943	0.114009	0.277912	0.825107	-0.277347	-1.21196	603.482	731.398
POU6F1	POU class 6 homeobox 1	POU6F1	POU6F1	protein_coding	5.53144e-07	7.22701e-06	0.422388	-1.24336	-2.36749	174.145	412.287	0.0583714	0.286716	0.724819	-0.464307	-1.37965	298.834	412.287	0.00185721	0.0109364	1.716	0.779051	1.716	298.834	174.145
PPID	peptidylprolyl isomerase D	PPID	PPID	protein_coding	0.00424252	0.0174494	1.46858	0.554423	1.46858	1070.44	728.893	0.048211	0.257219	1.30472	0.383739	1.30472	951	728.893	0.378217	0.595217	0.888421	-0.170684	-1.12559	951	1070.44
CTTNBP2NL	CTTNBP2 N-terminal like	CTTNBP2NL	CTTNBP2NL	protein_coding	0.00278776	0.012312	1.4682	0.554049	1.4682	1997.94	1360.81	0.0266993	0.179003	1.32959	0.410978	1.32959	1809.31	1360.81	0.439705	0.649043	0.905589	-0.143071	-1.10425	1809.31	1997.94
ENSCAFG00000016333	#N/A	ENSCAFG00000016333	---	protein_coding	0.00309159	0.0134303	0.609724	-0.713771	-1.64009	943.583	1547.56	0.78841	0.933708	1.04579	0.0645944	1.04579	1618.42	1547.56	0.00126175	0.00790286	1.71519	0.778365	1.71519	1618.42	943.583
TADA2A	transcriptional adaptor 2A	TADA2A	TADA2A	protein_coding	0.00450186	0.0182737	1.46774	0.553593	1.46774	316.193	215.429	0.180648	0.519465	1.20022	0.263304	1.20022	258.563	215.429	0.136248	0.312909	0.817738	-0.290289	-1.22288	258.563	316.193
KPNA4	karyopherin subunit alpha 4	KPNA4	KPNA4	protein_coding	0.00562119	0.0220207	1.46744	0.553305	1.46744	1525.87	1039.81	0.259292	0.609999	1.16948	0.225863	1.16948	1216.04	1039.81	0.101329	0.255817	0.796948	-0.327442	-1.25479	1216.04	1525.87
ENSCAFG00000020361	#N/A	ENSCAFG00000020361	---	protein_coding	0.00477393	0.0191973	1.46736	0.553218	1.46736	2817.91	1920.4	0.376245	0.712874	1.12794	0.173693	1.12794	2166.1	1920.4	0.0529392	0.160281	0.76869	-0.379526	-1.30091	2166.1	2817.91
FAM219B	family with sequence similarity 219 member B	FAM219B	FAM219B	protein_coding	1.37698e-10	3.67469e-09	0.417443	-1.26035	-2.39554	614.133	1471.18	0.012776	0.109894	0.713893	-0.486219	-1.40077	1050.26	1471.18	8.57598e-05	0.00075461	1.71016	0.774129	1.71016	1050.26	614.133
BTK	Bruton tyrosine kinase	BTK	BTK	protein_coding	1.59895e-05	0.000145041	0.705459	-0.503366	-1.41752	1746.21	2475.28	0.0199715	0.148623	1.20579	0.26998	1.20579	2984.67	2475.28	3.38659e-11	1.00268e-09	1.70923	0.773347	1.70923	2984.67	1746.21
RBKS	ribokinase	RBKS	RBKS	protein_coding	3.12143e-08	5.29722e-07	0.600856	-0.734908	-1.66429	335.904	559.042	0.767631	0.92629	1.02695	0.0383655	1.02695	574.108	559.042	6.90338e-09	1.43659e-07	1.70914	0.773274	1.70914	574.108	335.904
ENSCAFG00000019198	#N/A	ENSCAFG00000019198	---	protein_coding	0.00211178	0.00978709	1.4644	0.55031	1.4644	902.6	616.361	0.157817	0.483544	1.19238	0.253849	1.19238	734.939	616.361	0.0977304	0.24989	0.814248	-0.296461	-1.22813	734.939	902.6
CCDC57	coiled-coil domain containing 57	CCDC57	CCDC57	protein_coding	0.148907	0.282518	0.761208	-0.393637	-1.3137	116.399	152.913	0.157615	0.483247	1.30097	0.379586	1.30097	198.935	152.913	0.00448785	0.0228062	1.70908	0.773224	1.70908	198.935	116.399
LARP1	La ribonucleoprotein 1, translational regulator	LARP1	LARP1	protein_coding	0.000160511	0.00111734	1.46362	0.549545	1.46362	5733.07	3917.03	0.194503	0.538758	1.14006	0.18911	1.14006	4465.65	3917.03	0.013324	0.0551547	0.77893	-0.360435	-1.28381	4465.65	5733.07
CBX7	chromobox 7	CBX7	CBX7	protein_coding	3.56181e-06	3.85128e-05	0.506302	-0.98193	-1.97511	355.645	702.437	0.316605	0.661468	0.864292	-0.210409	-1.15702	607.111	702.437	0.00028541	0.00219376	1.70707	0.771521	1.70707	607.111	355.645
ZNF362	zinc finger protein 362	ZNF362	ZNF362	protein_coding	4.4643e-06	4.68395e-05	0.611095	-0.71053	-1.63641	1319.97	2160	0.703341	0.901822	1.04155	0.0587263	1.04155	2249.74	2160	6.93658e-07	9.91751e-06	1.70439	0.769257	1.70439	2249.74	1319.97
RABGGTB	Rab geranylgeranyltransferase subunit beta	RABGGTB	RABGGTB	protein_coding	0.000599834	0.00342546	1.46184	0.54779	1.46184	2185.95	1495.34	0.118604	0.417976	1.18891	0.249634	1.18891	1777.81	1495.34	0.0617975	0.180106	0.813291	-0.298156	-1.22957	1777.81	2185.95
RIBC1	RIB43A domain with coiled-coils 1	RIBC1	RIBC1	protein_coding	0.000692408	0.00385172	0.505465	-0.984317	-1.97838	36.2519	71.7199	0.438303	0.757803	0.861466	-0.215134	-1.16081	61.7843	71.7199	0.00932193	0.0415691	1.7043	0.769183	1.7043	61.7843	36.2519
ENSCAFG00000032615	#N/A	ENSCAFG00000032615	---	protein_coding	9.90289e-05	0.000735362	0.454196	-1.13861	-2.20169	132.485	291.691	0.200876	0.545674	0.773879	-0.369821	-1.29219	225.733	291.691	0.00903986	0.0405076	1.70384	0.768792	1.70384	225.733	132.485
CCDC152	coiled-coil domain containing 152	CCDC152	CCDC152	protein_coding	0.0270703	0.0765032	0.735399	-0.4434	-1.35981	89.6396	121.892	0.0927672	0.367837	1.25258	0.324899	1.25258	152.68	121.892	0.000121663	0.00103361	1.70326	0.768299	1.70326	152.68	89.6396
FSD1L	fibronectin type III and SPRY domain containing 1 like	FSD1L	FSD1L	protein_coding	1.849e-06	2.12944e-05	0.514056	-0.960004	-1.94532	217.897	423.879	0.332907	0.676652	0.875369	-0.192037	-1.14238	371.05	423.879	0.000150753	0.00124921	1.70287	0.767967	1.70287	371.05	217.897
ENSCAFG00000046442	#N/A	ENSCAFG00000046442	---	protein_coding	0.00460299	0.0186185	1.46078	0.546743	1.46078	561.646	384.483	0.0860219	0.353965	1.25932	0.332647	1.25932	484.187	384.483	0.266639	0.4819	0.862086	-0.214096	-1.15998	484.187	561.646
NKRF	NFKB repressing factor	NKRF	NKRF	protein_coding	0.010278	0.0358367	1.46041	0.546369	1.46041	454.943	311.518	0.032699	0.203679	1.37159	0.455853	1.37159	427.276	311.518	0.669826	0.819963	0.939187	-0.0905156	-1.06475	427.276	454.943
UBE2F	ubiquitin conjugating enzyme E2 F (putative)	UBE2F	UBE2F	protein_coding	0.00622291	0.0239684	1.46037	0.546337	1.46037	1010.51	691.956	0.218883	0.565466	1.18611	0.246233	1.18611	820.733	691.956	0.132935	0.307942	0.812194	-0.300104	-1.23123	820.733	1010.51
TMEM241	transmembrane protein 241	TMEM241	TMEM241	protein_coding	0.00091458	0.00484832	0.559968	-0.836584	-1.78582	62.5955	111.784	0.778093	0.930238	0.953453	-0.0687666	-1.04882	106.581	111.784	0.0026129	0.0145305	1.70269	0.767817	1.70269	106.581	62.5955
METTL4	methyltransferase 4, N6-adenosine	METTL4	METTL4	protein_coding	0.00791238	0.029003	1.46036	0.546322	1.46036	178.609	122.305	0.273798	0.625316	1.17173	0.228635	1.17173	143.308	122.305	0.122857	0.292063	0.802355	-0.317688	-1.24633	143.308	178.609
HGD	homogentisate 1,2-dioxygenase	HGD	HGD	protein_coding	9.74072e-05	0.000725271	1.46029	0.546255	1.46029	359.158	245.95	0.0803662	0.341654	1.18835	0.248965	1.18835	292.275	245.95	0.0339402	0.114576	0.81378	-0.29729	-1.22883	292.275	359.158
ENSCAFG00000031092	#N/A	ENSCAFG00000031092	---	protein_coding	0.0237857	0.0690305	0.810778	-0.30262	-1.23338	483.493	596.332	0.000440611	0.00857419	1.37886	0.463477	1.37886	822.259	596.332	9.1898e-09	1.86185e-07	1.70066	0.766097	1.70066	822.259	483.493
CLDND1	claudin domain containing 1	CLDND1	CLDND1	protein_coding	0.0451359	0.114348	0.690133	-0.535053	-1.449	3232.65	4684.09	0.387039	0.720579	1.17356	0.230889	1.17356	5497.05	4684.09	0.00413325	0.0213582	1.70048	0.765942	1.70048	5497.05	3232.65
LEPROT	leptin receptor overlapping transcript	LEPROT	LEPROT	protein_coding	0.000175724	0.00120261	0.740749	-0.432943	-1.34999	4509.95	6088.36	0.00397849	0.0485763	1.25844	0.331632	1.25844	7661.82	6088.36	3.44916e-11	1.01901e-09	1.69887	0.764576	1.69887	7661.82	4509.95
ANO8	anoctamin 8	ANO8	ANO8	protein_coding	4.58977e-13	1.71612e-11	0.486305	-1.04007	-2.05632	928.264	1908.81	0.0524893	0.26992	0.825428	-0.276787	-1.21149	1575.59	1908.81	1.20871e-07	1.9948e-06	1.69735	0.763282	1.69735	1575.59	928.264
USP14	ubiquitin specific peptidase 14	USP14	USP14	protein_coding	0.0003932	0.00241325	1.45969	0.545667	1.45969	3186.08	2182.7	0.0415062	0.234945	1.24331	0.314189	1.24331	2713.78	2182.7	0.132574	0.307364	0.851762	-0.231478	-1.17404	2713.78	3186.08
ORAI1	ORAI calcium release-activated calcium modulator 1	ORAI1	ORAI1	protein_coding	0.0912258	0.196234	0.771008	-0.375183	-1.297	255.213	331.012	0.0776564	0.335239	1.30854	0.387958	1.30854	433.143	331.012	0.000579416	0.00406566	1.69718	0.76314	1.69718	433.143	255.213
RNASEH2B	ribonuclease H2 subunit B	RNASEH2B	RNASEH2B	protein_coding	0.0100251	0.0351473	1.45856	0.544545	1.45856	1131.21	775.563	0.121391	0.424222	1.2554	0.328147	1.2554	973.642	775.563	0.305973	0.523112	0.860712	-0.216398	-1.16183	973.642	1131.21
GPATCH3	G-patch domain containing 3	GPATCH3	GPATCH3	protein_coding	0.0105549	0.0365803	1.45849	0.544477	1.45849	1330.52	912.26	0.524563	0.813922	1.09873	0.135832	1.09873	1002.32	912.26	0.0551296	0.165353	0.753331	-0.408645	-1.32744	1002.32	1330.52
FAM98B	family with sequence similarity 98 member B	FAM98B	FAM98B	protein_coding	0.00125087	0.00629865	1.4584	0.544382	1.4584	872.225	598.071	0.160031	0.487189	1.17946	0.238126	1.17946	705.401	598.071	0.0695273	0.195502	0.808738	-0.306256	-1.23649	705.401	872.225
ANXA1	annexin A1	ANXA1	ANXA1	protein_coding	4.37919e-07	5.8603e-06	0.40756	-1.29491	-2.45363	3999.81	9814.03	0.0374845	0.221868	0.691116	-0.533001	-1.44694	6782.63	9814.03	0.00296436	0.0161721	1.69574	0.761914	1.69574	6782.63	3999.81
FECH	ferrochelatase	FECH	FECH	protein_coding	0.000496811	0.00293813	0.658074	-0.603679	-1.51959	440.692	669.669	0.362059	0.701	1.11456	0.156469	1.11456	746.384	669.669	1.18719e-05	0.000131247	1.69366	0.760148	1.69366	746.384	440.692
VPS54	VPS54 subunit of GARP complex	VPS54	VPS54	protein_coding	0.00260229	0.0116269	1.45754	0.543533	1.45754	2129.68	1461.15	0.0532903	0.272414	1.2739	0.349249	1.2739	1861.36	1461.15	0.281579	0.498709	0.874007	-0.194283	-1.14416	1861.36	2129.68
HHEX	hematopoietically expressed homeobox	HHEX	HHEX	protein_coding	8.51934e-17	5.20095e-15	0.318911	-1.64877	-3.13567	442.178	1386.52	5.93544e-06	0.000239448	0.539485	-0.890346	-1.85362	748.009	1386.52	0.000143243	0.0011985	1.69165	0.758429	1.69165	748.009	442.178
SLC27A1	solute carrier family 27 member 1	SLC27A1	SLC27A1	protein_coding	0.000239712	0.00156522	0.617091	-0.696446	-1.62051	758.546	1229.23	0.745734	0.918135	1.04333	0.0611969	1.04333	1282.49	1229.23	6.56619e-05	0.000594057	1.69073	0.757643	1.69073	1282.49	758.546
METTL9	methyltransferase like 9	METTL9	METTL9	protein_coding	0.000300815	0.00190996	0.564804	-0.824178	-1.77053	1101.64	1950.48	0.766366	0.926152	0.954225	-0.0675982	-1.04797	1861.2	1950.48	0.000914823	0.00598758	1.68948	0.75658	1.68948	1861.2	1101.64
C4H1orf131	#N/A	C4H1orf131	C4H1orf131	protein_coding	0.00419331	0.0172753	1.45543	0.541444	1.45543	650.7	447.085	0.123094	0.427201	1.22503	0.292815	1.22503	547.692	447.085	0.188371	0.384517	0.841696	-0.248629	-1.18808	547.692	650.7
ENY2	ENY2 transcription and export complex 2 subunit	ENY2	ENY2	protein_coding	0.000658408	0.00370023	1.45416	0.540183	1.45416	386.594	265.854	0.235286	0.582514	1.14133	0.190711	1.14133	303.427	265.854	0.0278672	0.0983585	0.784871	-0.349472	-1.27409	303.427	386.594
GRAMD4	GRAM domain containing 4	GRAMD4	GRAMD4	protein_coding	0.001296	0.00649035	1.45343	0.539462	1.45343	812.818	559.241	0.00884077	0.0844125	1.35671	0.440111	1.35671	758.727	559.241	0.5526	0.738925	0.933452	-0.0993516	-1.07129	758.727	812.818
CHCHD2	coiled-coil-helix-coiled-coil-helix domain containing 2	CHCHD2	CHCHD2	protein_coding	7.57745e-05	0.000579845	1.45317	0.5392	1.45317	5634.38	3877.31	0.0205577	0.151403	1.24473	0.31583	1.24473	4826.19	3877.31	0.101065	0.255585	0.856562	-0.22337	-1.16746	4826.19	5634.38
ZNF785	zinc finger protein 785	ZNF785	ZNF785	protein_coding	0.516815	0.669007	0.901376	-0.149799	-1.10941	134.561	149.284	0.00772452	0.0774529	1.5206	0.604642	1.5206	227.001	149.284	0.000991271	0.00642998	1.68698	0.754441	1.68698	227.001	134.561
MANSC1	MANSC domain containing 1	MANSC1	MANSC1	protein_coding	6.51972e-20	6.03708e-18	0.486357	-1.03991	-2.0561	3014.82	6198.78	0.0116552	0.103546	0.820086	-0.286153	-1.21938	5083.53	6198.78	3.83815e-11	1.12193e-09	1.68618	0.75376	1.68618	5083.53	3014.82
ENSCAFG00000043266	#N/A	ENSCAFG00000043266	---	protein_coding	0.00301247	0.0131529	1.45235	0.538388	1.45235	2006.02	1381.22	0.0964149	0.375561	1.23299	0.302161	1.23299	1703.04	1381.22	0.192964	0.390312	0.848963	-0.236227	-1.17791	1703.04	2006.02
ATXN1	ataxin 1	ATXN1	ATXN1	protein_coding	0.549796	0.695196	0.944647	-0.0821531	-1.0586	1450.84	1535.85	9.3614e-07	4.60261e-05	1.59179	0.670653	1.59179	2444.76	1535.85	3.91133e-08	7.10997e-07	1.68507	0.752806	1.68507	2444.76	1450.84
GFM1	G elongation factor mitochondrial 1	GFM1	GFM1	protein_coding	0.00147004	0.00722042	1.45114	0.537188	1.45114	1843.49	1270.38	0.0352282	0.214116	1.28004	0.356184	1.28004	1626.13	1270.38	0.283588	0.50077	0.882089	-0.181004	-1.13367	1626.13	1843.49
COMMD9	COMM domain containing 9	COMMD9	COMMD9	protein_coding	0.000581266	0.00333877	1.45113	0.537181	1.45113	1247.31	859.539	0.20653	0.551801	1.14716	0.198067	1.14716	986.03	859.539	0.0299798	0.103797	0.790527	-0.339114	-1.26498	986.03	1247.31
PPFIBP1	PPFIA binding protein 1	PPFIBP1	PPFIBP1	protein_coding	0.00266201	0.0118324	0.598087	-0.741573	-1.672	229.435	383.615	0.963403	0.989602	1.00781	0.011223	1.00781	386.611	383.615	0.00234995	0.0132769	1.68506	0.752796	1.68506	386.611	229.435
STARD4	StAR related lipid transfer domain containing 4	STARD4	STARD4	protein_coding	0.00569918	0.02225	1.44928	0.535341	1.44928	992.418	684.764	0.184569	0.526027	1.19555	0.257672	1.19555	818.668	684.764	0.151594	0.335399	0.824923	-0.277669	-1.21223	818.668	992.418
RSKR	ribosomal protein S6 kinase related	RSKR	RSKR	protein_coding	0.00010027	0.000742582	0.577954	-0.790974	-1.73024	176.564	305.499	0.846604	0.954177	0.973566	-0.0386495	-1.02715	297.423	305.499	0.000234162	0.00184461	1.68451	0.752325	1.68451	297.423	176.564
ENSCAFG00000024483	#N/A	ENSCAFG00000024483	---	protein_coding	0.0393468	0.102521	0.690983	-0.533278	-1.44721	140.003	202.614	0.39257	0.723896	1.16334	0.218277	1.16334	235.71	202.614	0.00370757	0.0195018	1.68361	0.751555	1.68361	235.71	140.003
ACAP1	ArfGAP with coiled-coil, ankyrin repeat and PH domains 1	ACAP1	ACAP1	protein_coding	1.14036e-05	0.000107691	0.491901	-1.02356	-2.03293	525.283	1067.86	0.241233	0.588766	0.828111	-0.272104	-1.20757	884.309	1067.86	0.00130791	0.00815791	1.68349	0.751457	1.68349	884.309	525.283
ZMYM1	zinc finger MYM-type containing 1	ZMYM1	ZMYM1	protein_coding	0.41545	0.579229	0.916405	-0.125942	-1.09122	594.92	649.188	4.68043e-05	0.00138522	1.5412	0.624053	1.5412	1000.53	649.188	1.10802e-06	1.51811e-05	1.68179	0.749995	1.68179	1000.53	594.92
PDE7A	phosphodiesterase 7A	PDE7A	PDE7A	protein_coding	0.000522813	0.00305258	0.509515	-0.972805	-1.96265	67.3814	132.246	0.415161	0.741389	0.85677	-0.223021	-1.16717	113.305	132.246	0.00823639	0.0377104	1.68154	0.749784	1.68154	113.305	67.3814
MTMR4	myotubularin related protein 4	MTMR4	MTMR4	protein_coding	3.42691e-20	3.35327e-18	2.6303	1.39523	2.6303	5290.11	2011.22	1.683e-14	2.97698e-12	2.24056	1.16386	2.24056	4506.25	2011.22	0.125616	0.296159	0.851825	-0.231371	-1.17395	4506.25	5290.11
BCAS3	BCAS3 microtubule associated cell migration factor	BCAS3	BCAS3	protein_coding	0.000227418	0.00149699	0.551378	-0.858888	-1.81364	307.351	557.424	0.636792	0.872975	0.927115	-0.109179	-1.07861	516.797	557.424	0.00133629	0.00830487	1.68145	0.749709	1.68145	516.797	307.351
YAE1	YAE1 maturation factor of ABCE1	YAE1	YAE1	protein_coding	0.00869688	0.0313456	1.44604	0.532111	1.44604	1221.54	844.746	0.0979024	0.379001	1.26244	0.33622	1.26244	1066.45	844.746	0.333862	0.553175	0.873034	-0.195891	-1.14543	1066.45	1221.54
ENSCAFG00000006577	#N/A	ENSCAFG00000006577	---	protein_coding	0.000299122	0.00190272	1.44566	0.531729	1.44566	9547.92	6604.53	0.115512	0.411176	1.1741	0.23156	1.1741	7754.41	6604.53	0.0412243	0.13255	0.812157	-0.300169	-1.23129	7754.41	9547.92
UBALD2	UBA like domain containing 2	UBALD2	UBALD2	protein_coding	9.90493e-10	2.2403e-08	0.546256	-0.872351	-1.83064	555.048	1016.1	0.372871	0.71068	0.916507	-0.125782	-1.0911	931.259	1016.1	1.93292e-07	3.0902e-06	1.6778	0.746569	1.6778	931.259	555.048
NUFIP1	nuclear FMR1 interacting protein 1	NUFIP1	NUFIP1	protein_coding	0.00181035	0.00855759	1.44427	0.530336	1.44427	233.32	161.549	0.0707522	0.318289	1.24071	0.311166	1.24071	200.436	161.549	0.196039	0.394681	0.85906	-0.21917	-1.16406	200.436	233.32
ENSCAFG00000016517	#N/A	ENSCAFG00000016517	---	protein_coding	0.00622118	0.0239684	1.44421	0.530278	1.44421	370.389	256.465	0.210649	0.555808	1.18471	0.244535	1.18471	303.837	256.465	0.140517	0.318979	0.820319	-0.285743	-1.21904	303.837	370.389
PSMB7	proteasome 20S subunit beta 7	PSMB7	PSMB7	protein_coding	0.000216582	0.0014394	1.44382	0.529889	1.44382	3201.99	2217.73	0.0399766	0.22972	1.22661	0.294671	1.22661	2720.28	2217.73	0.100544	0.254828	0.849557	-0.235217	-1.17708	2720.28	3201.99
TRIOBP	TRIO and F-actin binding protein	TRIOBP	TRIOBP	protein_coding	0.360848	0.526281	0.876519	-0.190143	-1.14088	882.077	1006.34	0.0076528	0.0769575	1.46732	0.553179	1.46732	1476.62	1006.34	0.000347876	0.00259721	1.67403	0.743322	1.67403	1476.62	882.077
DHX9	DExH-box helicase 9	DHX9	DHX9	protein_coding	0.00168398	0.00807853	1.44336	0.529431	1.44336	3511.46	2432.84	0.0809754	0.342512	1.22639	0.294419	1.22639	2983.61	2432.84	0.163189	0.35054	0.849678	-0.235012	-1.17692	2983.61	3511.46
WDR81	WD repeat domain 81	WDR81	WDR81	protein_coding	0.00316764	0.0137089	1.4431	0.529175	1.4431	4797.48	3324.42	0.451478	0.765329	1.09821	0.135147	1.09821	3650.89	3324.42	0.0280386	0.0986605	0.761002	-0.394028	-1.31406	3650.89	4797.48
AP2S1	adaptor related protein complex 2 subunit sigma 1	AP2S1	AP2S1	protein_coding	0.223594	0.376807	0.859151	-0.219017	-1.16394	2022.15	2353.66	0.00355651	0.0443663	1.43754	0.523603	1.43754	3383.48	2353.66	3.63932e-05	0.000351131	1.67321	0.74262	1.67321	3383.48	2022.15
BRAF	B-Raf proto-oncogene, serine/threonine kinase	BRAF	BRAF	protein_coding	0.0802462	0.177785	0.745364	-0.423983	-1.34163	502.39	674.02	0.186917	0.529331	1.24706	0.318529	1.24706	840.542	674.02	0.00218147	0.0124887	1.67309	0.742511	1.67309	840.542	502.39
ENSCAFG00000029170	#N/A	ENSCAFG00000029170	---	protein_coding	0.00143911	0.00709377	1.44225	0.528323	1.44225	672.688	466.415	0.055109	0.277203	1.24787	0.319472	1.24787	582.028	466.415	0.20729	0.409036	0.865226	-0.208851	-1.15577	582.028	672.688
QSOX2	quiescin sulfhydryl oxidase 2	QSOX2	QSOX2	protein_coding	0.000274208	0.00176129	1.44126	0.527328	1.44126	988.76	686.04	0.0144347	0.118828	1.27971	0.355818	1.27971	877.933	686.04	0.235963	0.445743	0.887913	-0.17151	-1.12624	877.933	988.76
ARL6	ADP ribosylation factor like GTPase 6	ARL6	ARL6	protein_coding	0.00104987	0.00542106	0.577632	-0.791779	-1.73121	129.603	224.369	0.828741	0.94994	0.964998	-0.0514022	-1.03627	216.516	224.369	0.00231446	0.0131302	1.67061	0.740376	1.67061	216.516	129.603
TMEM33	transmembrane protein 33	TMEM33	TMEM33	protein_coding	1.36404e-05	0.000126306	1.44057	0.526636	1.44057	3104.21	2154.86	0.0169809	0.133585	1.22232	0.289627	1.22232	2633.93	2154.86	0.0502351	0.154055	0.848503	-0.237009	-1.17855	2633.93	3104.21
TTC32	tetratricopeptide repeat domain 32	TTC32	TTC32	protein_coding	0.0249454	0.0717324	0.760775	-0.394459	-1.31445	183.744	241.522	0.045112	0.247479	1.26988	0.344695	1.26988	306.704	241.522	2.52779e-05	0.00025644	1.6692	0.739154	1.6692	306.704	183.744
CTSS	cathepsin S	CTSS	CTSS	protein_coding	0.000338611	0.00211798	1.43995	0.526021	1.43995	165263	114770	0.00565679	0.0627386	1.32513	0.406139	1.32513	152086	114770	0.414043	0.627339	0.920263	-0.119882	-1.08665	152086	165263
ENSCAFG00000029477	#N/A	ENSCAFG00000029477	---	protein_coding	0.000681987	0.00380792	1.4391	0.525163	1.4391	1954.91	1358.43	0.0218195	0.15695	1.27913	0.355164	1.27913	1737.6	1358.43	0.271223	0.487173	0.888843	-0.169999	-1.12506	1737.6	1954.91
HSD17B12	hydroxysteroid 17-beta dehydrogenase 12	HSD17B12	HSD17B12	protein_coding	0.0152374	0.048902	1.43886	0.52493	1.43886	3217.67	2236.26	0.443608	0.760212	1.12184	0.16587	1.12184	2508.73	2236.26	0.0970032	0.248765	0.779672	-0.35906	-1.28259	2508.73	3217.67
CNOT9	CCR4-NOT transcription complex subunit 9	CNOT9	CNOT9	protein_coding	0.00194399	0.00911977	1.43884	0.524904	1.43884	838.341	582.652	0.0790531	0.338068	1.22998	0.298631	1.22998	716.648	582.652	0.181398	0.375917	0.854841	-0.226273	-1.16981	716.648	838.341
MCM7	minichromosome maintenance complex component 7	MCM7	MCM7	protein_coding	1.80588e-07	2.62547e-06	0.525044	-0.929491	-1.9046	453.357	863.466	0.27968	0.630926	0.876071	-0.19088	-1.14146	756.458	863.466	3.63873e-05	0.000351131	1.66857	0.738611	1.66857	756.458	453.357
ITGA4	integrin subunit alpha 4	ITGA4	ITGA4	protein_coding	1.28755e-06	1.54338e-05	0.486031	-1.04088	-2.05748	3235.95	6657.92	0.157466	0.483113	0.810204	-0.303644	-1.23426	5394.27	6657.92	0.000608788	0.00425073	1.66698	0.737236	1.66698	5394.27	3235.95
SNX6	sorting nexin 6	SNX6	SNX6	protein_coding	0.686703	0.800747	1.03493	0.0495333	1.03493	3390.86	3276.42	1.41839e-10	1.38791e-08	1.72413	0.785869	1.72413	5648.97	3276.42	1.89049e-09	4.34719e-08	1.66594	0.736336	1.66594	5648.97	3390.86
ST6GAL1	ST6 beta-galactoside alpha-2,6-sialyltransferase 1	ST6GAL1	ST6GAL1	protein_coding	9.23e-08	1.43086e-06	0.656385	-0.607386	-1.5235	2641.11	4023.72	0.255761	0.605998	1.09335	0.128758	1.09335	4399.34	4023.72	9.83038e-11	2.68043e-09	1.66572	0.736144	1.66572	4399.34	2641.11
ENSCAFG00000032642	#N/A	ENSCAFG00000032642	---	protein_coding	0.00542944	0.021395	1.4375	0.523562	1.4375	577.397	401.667	0.00847571	0.0821121	1.41085	0.496564	1.41085	566.692	401.667	0.885609	0.943762	0.98146	-0.026998	-1.01889	566.692	577.397
CAB39	calcium binding protein 39	CAB39	CAB39	protein_coding	0.0439121	0.111905	0.856093	-0.224161	-1.1681	1928.01	2252.1	3.86439e-06	0.000161078	1.42521	0.511175	1.42521	3209.72	2252.1	3.56513e-11	1.05103e-09	1.66479	0.735336	1.66479	3209.72	1928.01
FAF1	Fas associated factor 1	FAF1	FAF1	protein_coding	0.000758303	0.00414513	1.43652	0.522583	1.43652	940.008	654.362	0.0505069	0.264156	1.23514	0.304673	1.23514	808.228	654.362	0.159976	0.346131	0.85981	-0.21791	-1.16305	808.228	940.008
CPSF2	cleavage and polyadenylation specific factor 2	CPSF2	CPSF2	protein_coding	4.88449e-05	0.000391991	1.43533	0.521379	1.43533	1814.48	1264.16	0.0798029	0.339988	1.16939	0.225758	1.16939	1478.29	1264.16	0.0213429	0.0797154	0.814721	-0.295621	-1.22741	1478.29	1814.48
MAPKBP1	mitogen-activated protein kinase binding protein 1	MAPKBP1	MAPKBP1	protein_coding	0.000297302	0.00189289	0.637124	-0.650354	-1.56955	1198.11	1880.49	0.635563	0.87268	1.06063	0.0849225	1.06063	1994.51	1880.49	4.36584e-05	0.000413705	1.66472	0.735277	1.66472	1994.51	1198.11
SUV39H2	suppressor of variegation 3-9 homolog 2	SUV39H2	SUV39H2	protein_coding	0.375828	0.541206	0.855014	-0.22598	-1.16957	200.789	234.837	0.0439617	0.243395	1.42322	0.509161	1.42322	334.226	234.837	0.00384645	0.0201021	1.66456	0.73514	1.66456	334.226	200.789
MAT2A	methionine adenosyltransferase 2A	MAT2A	MAT2A	protein_coding	0.00943623	0.0335028	1.23479	0.304266	1.23479	6508.81	5271.19	7.01364e-19	2.01598e-16	2.05478	1.03899	2.05478	10831.1	5271.19	3.40408e-10	8.69743e-09	1.66407	0.73472	1.66407	10831.1	6508.81
NDUFB2	NADH:ubiquinone oxidoreductase subunit B2	NDUFB2	NDUFB2	protein_coding	0.00149086	0.00730704	1.4326	0.518631	1.4326	2334.29	1629.41	0.00842568	0.0818656	1.34771	0.430505	1.34771	2195.97	1629.41	0.589064	0.766399	0.940744	-0.0881259	-1.06299	2195.97	2334.29
PLEC	plectin	PLEC	PLEC	protein_coding	9.85582e-14	4.17119e-12	0.424936	-1.23468	-2.3533	27008.2	63558.3	0.00254986	0.0342555	0.706907	-0.500407	-1.41461	44929.8	63558.3	9.59323e-06	0.000108135	1.66356	0.734277	1.66356	44929.8	27008.2
FKBP2	FKBP prolyl isomerase 2	FKBP2	FKBP2	protein_coding	0.00694395	0.0261585	1.43167	0.517699	1.43167	1297.19	906.066	0.289345	0.640219	1.15165	0.203706	1.15165	1043.47	906.066	0.101695	0.25627	0.804412	-0.313993	-1.24314	1043.47	1297.19
RPF1	ribosome production factor 1 homolog	RPF1	RPF1	protein_coding	0.000367421	0.00227323	1.43111	0.517139	1.43111	1766.81	1234.57	0.0897246	0.361621	1.18675	0.247019	1.18675	1465.13	1234.57	0.0627972	0.182329	0.82925	-0.27012	-1.20591	1465.13	1766.81
ATP6V1A	ATPase H+ transporting V1 subunit A	ATP6V1A	ATP6V1A	protein_coding	0.00787772	0.0289297	1.43109	0.517114	1.43109	7119.01	4974.54	0.0946314	0.37208	1.25298	0.325368	1.25298	6233.02	4974.54	0.324427	0.542346	0.875545	-0.191746	-1.14215	6233.02	7119.01
FSCN1	fascin actin-bundling protein 1	FSCN1	FSCN1	protein_coding	8.73171e-05	0.00065652	2.05338	1.038	2.05338	6853.35	3337.59	2.09889e-11	2.39326e-09	3.41531	1.77202	3.41531	11398.9	3337.59	0.00548846	0.0269482	1.66326	0.734013	1.66326	11398.9	6853.35
TMEM245	transmembrane protein 245	TMEM245	TMEM245	protein_coding	0.000102418	0.000755151	1.43041	0.516427	1.43041	1032.52	721.837	0.152611	0.475193	1.14189	0.191421	1.14189	824.257	721.837	0.0146045	0.0593865	0.798295	-0.325005	-1.25267	824.257	1032.52
MGAT2	alpha-1,6-mannosyl-glycoprotein 2-beta-N-acetylglucosaminyltransferase	MGAT2	MGAT2	protein_coding	0.0132642	0.0438129	1.43013	0.516145	1.43013	3035.54	2122.56	0.256406	0.606694	1.17831	0.236723	1.17831	2501.04	2122.56	0.180027	0.374298	0.823921	-0.279422	-1.21371	2501.04	3035.54
LYST	lysosomal trafficking regulator	LYST	LYST	protein_coding	1.08282e-13	4.5135e-12	0.44184	-1.1784	-2.26326	1672.21	3784.64	0.00494002	0.0568453	0.734873	-0.444433	-1.36078	2781.23	3784.64	3.86114e-06	4.7522e-05	1.66321	0.73397	1.66321	2781.23	1672.21
ELOF1	elongation factor 1 homolog	ELOF1	ELOF1	protein_coding	0.0153115	0.0490602	1.42998	0.515996	1.42998	177.394	124.053	0.908779	0.975817	1.01742	0.0249175	1.01742	126.214	124.053	0.0222478	0.0823815	0.711493	-0.491078	-1.4055	126.214	177.394
LANCL1	LanC like 1	LANCL1	LANCL1	protein_coding	0.00322778	0.0139255	1.42992	0.515932	1.42992	904.39	632.477	0.0835266	0.348175	1.23466	0.304117	1.23466	780.896	632.477	0.226374	0.433247	0.86345	-0.211815	-1.15814	780.896	904.39
ZNF331	zinc finger protein 331	ZNF331	ZNF331	protein_coding	0.000534764	0.0031184	0.609409	-0.714516	-1.64093	142.925	234.53	0.923722	0.979097	1.0135	0.0193518	1.0135	237.697	234.53	0.000405278	0.00296166	1.66309	0.733868	1.66309	237.697	142.925
MRPS18A	mitochondrial ribosomal protein S18A	MRPS18A	MRPS18A	protein_coding	0.00569187	0.0222404	1.42951	0.51552	1.42951	542.127	379.24	0.712796	0.906634	1.04915	0.0692269	1.04915	397.882	379.24	0.0170441	0.0670415	0.733926	-0.446293	-1.36253	397.882	542.127
SLC35C2	solute carrier family 35 member C2	SLC35C2	SLC35C2	protein_coding	0.0126991	0.0423884	1.42926	0.515269	1.42926	1566.92	1096.31	0.207718	0.553172	1.19821	0.260883	1.19821	1313.62	1096.31	0.218567	0.423654	0.838344	-0.254386	-1.19283	1313.62	1566.92
ENSCAFG00000009583	#N/A	ENSCAFG00000009583	---	protein_coding	0.0381502	0.100053	1.50071	0.585648	1.50071	409.86	273.11	5.27824e-05	0.00153313	2.20206	1.13885	2.20206	601.404	273.11	0.0486676	0.150418	1.46734	0.553204	1.46734	601.404	409.86
ZNF555	zinc finger protein 555	ZNF555	ZNF555	protein_coding	0.015123	0.0485801	1.42861	0.514617	1.42861	157.382	110.164	0.122052	0.425239	1.25797	0.331097	1.25797	138.583	110.164	0.384635	0.601268	0.880552	-0.18352	-1.13565	138.583	157.382
YRDC	yrdC N6-threonylcarbamoyltransferase domain containing	YRDC	YRDC	protein_coding	0.00478765	0.0192412	1.42856	0.514565	1.42856	754.428	528.102	0.0485228	0.257974	1.28418	0.360852	1.28418	678.18	528.102	0.398811	0.614501	0.898934	-0.153714	-1.11243	678.18	754.428
EIF5B	eukaryotic translation initiation factor 5B	EIF5B	EIF5B	protein_coding	0.00139942	0.00693277	1.42822	0.514222	1.42822	3407.44	2385.79	0.0717879	0.320687	1.22272	0.290095	1.22272	2917.16	2385.79	0.163733	0.351259	0.856113	-0.224127	-1.16807	2917.16	3407.44
KIFC2	kinesin family member C2	KIFC2	KIFC2	protein_coding	1.86788e-05	0.000166804	0.438937	-1.18791	-2.27823	440.463	1003.48	0.0994969	0.381299	0.729247	-0.45552	-1.37128	731.783	1003.48	0.0084884	0.0384865	1.66139	0.732395	1.66139	731.783	440.463
DYNLT3	dynein light chain Tctex-type 3	DYNLT3	DYNLT3	protein_coding	1.87628e-08	3.3533e-07	0.634865	-0.655477	-1.57514	1038.66	1636.04	0.506142	0.801842	1.05469	0.076819	1.05469	1725.51	1636.04	3.61373e-10	9.13162e-09	1.66128	0.732296	1.66128	1725.51	1038.66
PCGF2	polycomb group ring finger 2	PCGF2	PCGF2	protein_coding	9.43514e-06	9.15519e-05	0.699631	-0.515333	-1.42932	496.8	710.089	0.0580836	0.286105	1.16182	0.216386	1.16182	824.995	710.089	3.30613e-10	8.46283e-09	1.66062	0.731719	1.66062	824.995	496.8
ENSCAFG00000031458	#N/A	ENSCAFG00000031458	---	protein_coding	1.81247e-05	0.000162381	1.42722	0.51321	1.42722	9594.76	6722.68	0.0110483	0.0996947	1.23491	0.304409	1.23491	8301.92	6722.68	0.0810996	0.218627	0.865256	-0.208801	-1.15573	8301.92	9594.76
VPS50	VPS50 subunit of EARP/GARPII complex	VPS50	VPS50	protein_coding	1.2561e-05	0.000117097	1.42712	0.513105	1.42712	792.106	555.039	0.0122199	0.106377	1.22836	0.296728	1.22836	681.785	555.039	0.0651721	0.186901	0.860724	-0.216377	-1.16181	681.785	792.106
SERGEF	secretion regulating guanine nucleotide exchange factor	SERGEF	SERGEF	protein_coding	1.28516e-06	1.54185e-05	0.45784	-1.12708	-2.18417	421.344	920.286	0.0874595	0.357429	0.760156	-0.395632	-1.31552	699.561	920.286	0.00174191	0.0103949	1.66031	0.731452	1.66031	699.561	421.344
SCAND1	SCAN domain containing 1	SCAND1	SCAND1	protein_coding	3.54459e-17	2.296e-15	0.523139	-0.934733	-1.91154	1185	2265.18	0.0644014	0.302264	0.868521	-0.203368	-1.15138	1967.35	2265.18	5.17292e-11	1.4838e-09	1.66021	0.731365	1.66021	1967.35	1185
ENSCAFG00000002851	#N/A	ENSCAFG00000002851	---	protein_coding	0.000586131	0.00336251	1.42635	0.512324	1.42635	541.375	379.553	0.312408	0.659131	1.11127	0.152205	1.11127	421.785	379.553	0.0159553	0.0636782	0.7791	-0.360119	-1.28353	421.785	541.375
MYPOP	Myb related transcription factor, partner of profilin	MYPOP	MYPOP	protein_coding	0.000634359	0.00358993	0.522513	-0.93646	-1.91383	63.1621	120.881	0.441833	0.759842	0.867377	-0.205268	-1.1529	104.85	120.881	0.0084507	0.0383408	1.66001	0.731192	1.66001	104.85	63.1621
ADAM15	ADAM metallopeptidase domain 15	ADAM15	ADAM15	protein_coding	0.0379349	0.0996169	1.72318	0.785071	1.72318	62.2879	36.1471	0.002456	0.0333191	2.20159	1.13855	2.20159	79.5812	36.1471	0.33612	0.555395	1.27763	0.353475	1.27763	79.5812	62.2879
HYPK	huntingtin interacting protein K	HYPK	HYPK	protein_coding	0.0016112	0.00778624	1.42496	0.510925	1.42496	1051.2	737.706	0.0391264	0.2272	1.26147	0.33511	1.26147	930.597	737.706	0.277387	0.494202	0.885268	-0.175814	-1.1296	930.597	1051.2
ENSCAFG00000008221	#N/A	ENSCAFG00000008221	---	protein_coding	0.00683227	0.0258543	1.42412	0.510069	1.42412	34741.2	24394.9	0.107023	0.394923	1.23451	0.303943	1.23451	30115.8	24394.9	0.27434	0.490802	0.866861	-0.206127	-1.15359	30115.8	34741.2
DDX39B	DExD-box helicase 39B	DDX39B	DDX39B	protein_coding	0.0065764	0.0250787	1.42388	0.509832	1.42388	4051.11	2845.11	0.367002	0.705214	1.12458	0.169391	1.12458	3199.56	2845.11	0.0696322	0.195668	0.7898	-0.340441	-1.26614	3199.56	4051.11
CDC5L	cell division cycle 5 like	CDC5L	CDC5L	protein_coding	0.00283857	0.0125044	1.42272	0.508647	1.42272	2421.29	1701.88	0.217638	0.564301	1.15704	0.210439	1.15704	1969.14	1701.88	0.0802072	0.217185	0.813262	-0.298209	-1.22962	1969.14	2421.29
CYSLTR2	cysteinyl leukotriene receptor 2	CYSLTR2	CYSLTR2	protein_coding	0.952594	0.972471	1.01045	0.0150032	1.01045	514.91	509.583	0.0030012	0.0390269	1.67731	0.746149	1.67731	854.728	509.583	0.00367055	0.0193292	1.65996	0.731146	1.65996	854.728	514.91
ENSCAFG00000031581	#N/A	ENSCAFG00000031581	---	protein_coding	0.000385923	0.00237386	0.672096	-0.573261	-1.48788	614.892	914.888	0.325836	0.669757	1.11532	0.157461	1.11532	1020.4	914.888	6.18405e-06	7.33631e-05	1.65947	0.730722	1.65947	1020.4	614.892
AASDHPPT	aminoadipate-semialdehyde dehydrogenase-phosphopantetheinyl transferase	AASDHPPT	AASDHPPT	protein_coding	0.000943743	0.00497797	1.4219	0.507818	1.4219	559.218	393.29	0.0083447	0.0815178	1.32571	0.406762	1.32571	521.387	393.29	0.509061	0.706235	0.93235	-0.101056	-1.07256	521.387	559.218
TMEM50A	transmembrane protein 50A	TMEM50A	TMEM50A	protein_coding	1.68532e-06	1.95988e-05	0.672334	-0.572751	-1.48736	1894.99	2818.52	0.186057	0.527555	1.11532	0.15746	1.11532	3143.56	2818.52	1.05802e-09	2.50817e-08	1.65888	0.730211	1.65888	3143.56	1894.99
EHD1	EH domain containing 1	EHD1	EHD1	protein_coding	1.19485e-07	1.80168e-06	2.54156	1.34572	2.54156	2807.51	1104.64	7.66656e-06	0.000297959	2.20047	1.13781	2.20047	2430.73	1104.64	0.412424	0.626003	0.865795	-0.207902	-1.15501	2430.73	2807.51
METTL3	methyltransferase 3, N6-adenosine-methyltransferase complex catalytic subunit	METTL3	METTL3	protein_coding	0.000500583	0.00295404	1.42031	0.506203	1.42031	800.122	563.344	0.312534	0.659131	1.10806	0.148041	1.10806	624.221	563.344	0.0139914	0.0572137	0.780157	-0.358163	-1.28179	624.221	800.122
SYNCRIP	synaptotagmin binding cytoplasmic RNA interacting protein	SYNCRIP	SYNCRIP	protein_coding	0.00681206	0.0257989	1.4195	0.505385	1.4195	3951.5	2783.72	0.183856	0.525081	1.18789	0.248396	1.18789	3306.75	2783.72	0.168845	0.358622	0.836833	-0.256989	-1.19498	3306.75	3951.5
ACAT1	acetyl-CoA acetyltransferase 1	ACAT1	ACAT1	protein_coding	0.00223532	0.0102631	1.41906	0.504933	1.41906	1768.82	1246.47	0.168228	0.50152	1.17129	0.228099	1.17129	1459.98	1246.47	0.0937935	0.243109	0.825401	-0.276834	-1.21153	1459.98	1768.82
POLR3E	RNA polymerase III subunit E	POLR3E	POLR3E	protein_coding	0.00239566	0.0108762	1.41888	0.504757	1.41888	818.667	576.98	0.160446	0.487681	1.17644	0.234424	1.17644	678.78	576.98	0.104038	0.260415	0.829128	-0.270333	-1.20609	678.78	818.667
ECM1	extracellular matrix protein 1	ECM1	ECM1	protein_coding	0.00106944	0.00550973	0.6455	-0.63151	-1.54919	430.227	666.502	0.607663	0.860066	1.07054	0.0983412	1.07054	713.518	666.502	0.000159803	0.00131496	1.65847	0.729851	1.65847	713.518	430.227
CYP20A1	cytochrome P450 family 20 subfamily A member 1	CYP20A1	CYP20A1	protein_coding	5.47374e-07	7.17e-06	0.609399	-0.714541	-1.64096	313.239	514.014	0.91297	0.976358	1.01065	0.0152872	1.01065	519.489	514.014	3.61426e-07	5.4558e-06	1.65844	0.729828	1.65844	519.489	313.239
ENSCAFG00000024588	#N/A	ENSCAFG00000024588	---	protein_coding	0.0136523	0.0448371	1.41744	0.503284	1.41744	1794.29	1265.87	0.0605461	0.292694	1.30432	0.383302	1.30432	1651.1	1265.87	0.556363	0.741947	0.920199	-0.119982	-1.08672	1651.1	1794.29
MYLIP	myosin regulatory light chain interacting protein	MYLIP	MYLIP	protein_coding	6.79749e-14	2.90356e-12	0.250951	-1.99452	-3.98484	163.732	652.446	1.55377e-06	7.16542e-05	0.415996	-1.26536	-2.40387	271.414	652.446	0.00683817	0.0323214	1.65768	0.729163	1.65768	271.414	163.732
FUCA2	alpha-L-fucosidase 2	FUCA2	FUCA2	protein_coding	0.0140816	0.0459082	1.4162	0.502028	1.4162	2884.91	2037.08	0.217507	0.564201	1.19116	0.252365	1.19116	2426.48	2037.08	0.2221	0.428037	0.841093	-0.249662	-1.18893	2426.48	2884.91
CCDC112	coiled-coil domain containing 112	CCDC112	CCDC112	protein_coding	6.28009e-05	0.000490637	0.631635	-0.662836	-1.58319	161.244	255.281	0.681255	0.89118	1.04689	0.0661135	1.04689	267.252	255.281	1.21977e-05	0.000134418	1.65743	0.72895	1.65743	267.252	161.244
ORMDL1	ORMDL sphingolipid biosynthesis regulator 1	ORMDL1	ORMDL1	protein_coding	0.00499428	0.019967	1.4154	0.501206	1.4154	533.708	377.073	0.135791	0.449714	1.20395	0.26777	1.20395	453.976	377.073	0.19094	0.387185	0.850607	-0.233436	-1.17563	453.976	533.708
NDUFB6	NADH:ubiquinone oxidoreductase subunit B6	NDUFB6	NDUFB6	protein_coding	0.0128981	0.042819	1.41525	0.501058	1.41525	1950.56	1378.24	0.0272888	0.180993	1.36135	0.445039	1.36135	1876.28	1378.24	0.780863	0.888469	0.961915	-0.056019	-1.03959	1876.28	1950.56
DPP9	dipeptidyl peptidase 9	DPP9	DPP9	protein_coding	0.00573858	0.0223596	1.4145	0.50029	1.4145	2557.93	1808.37	0.225461	0.571082	1.16458	0.219814	1.16458	2105.99	1808.37	0.121519	0.290191	0.823319	-0.280476	-1.2146	2105.99	2557.93
KCNIP3	potassium voltage-gated channel interacting protein 3	KCNIP3	KCNIP3	protein_coding	1.98326e-07	2.85627e-06	0.423568	-1.23933	-2.3609	120.637	284.812	0.0288705	0.187183	0.701582	-0.511317	-1.42535	199.819	284.812	0.00257742	0.0143505	1.65636	0.728017	1.65636	199.819	120.637
RNF19A	ring finger protein 19A, RBR E3 ubiquitin protein ligase	RNF19A	RNF19A	protein_coding	0.00412445	0.0170323	1.4138	0.499574	1.4138	2097.57	1483.64	0.641618	0.874163	1.05794	0.0812574	1.05794	1569.61	1483.64	0.0164091	0.0650565	0.748297	-0.418317	-1.33637	1569.61	2097.57
EIF4G1	eukaryotic translation initiation factor 4 gamma 1	EIF4G1	EIF4G1	protein_coding	0.00507587	0.0202404	1.41337	0.499139	1.41337	16776.4	11869.8	0.312257	0.659131	1.13291	0.180034	1.13291	13447.4	11869.8	0.0732296	0.203004	0.801567	-0.319105	-1.24756	13447.4	16776.4
XYLT2	xylosyltransferase 2	XYLT2	XYLT2	protein_coding	1.67449e-06	1.95126e-05	0.550798	-0.860406	-1.81555	445.564	808.944	0.455618	0.768326	0.912004	-0.132888	-1.09649	737.76	808.944	5.47636e-05	0.000505062	1.65579	0.727518	1.65579	737.76	445.564
KATNAL1	katanin catalytic subunit A1 like 1	KATNAL1	KATNAL1	protein_coding	0.0460756	0.116302	0.711584	-0.490895	-1.40532	80.1664	112.659	0.324686	0.669158	1.17788	0.236188	1.17788	132.699	112.659	0.00314931	0.0169731	1.65529	0.727083	1.65529	132.699	80.1664
ENSCAFG00000029870	#N/A	ENSCAFG00000029870	---	protein_coding	0.0146414	0.0472864	1.4125	0.498252	1.4125	173.773	123.025	0.275814	0.627231	1.16928	0.225617	1.16928	143.85	123.025	0.182103	0.376739	0.827806	-0.272636	-1.20801	143.85	173.773
ARF1	ADP ribosylation factor 1	ARF1	ARF1	protein_coding	0.000898114	0.00477322	1.41202	0.497763	1.41202	1706.54	1208.58	0.143028	0.462577	1.16486	0.220161	1.16486	1407.83	1208.58	0.0641205	0.184961	0.824961	-0.277602	-1.21218	1407.83	1706.54
ENSCAFG00000006913	#N/A	ENSCAFG00000006913	---	protein_coding	0.00290881	0.0127568	1.41172	0.497454	1.41172	4846.44	3433	0.068898	0.313771	1.23467	0.304129	1.23467	4238.63	3433	0.247205	0.458733	0.874587	-0.193326	-1.1434	4238.63	4846.44
PLXND1	plexin D1	PLXND1	PLXND1	protein_coding	6.62152e-17	4.1338e-15	0.50224	-0.993551	-1.99108	16255.3	32365.7	0.0247376	0.16991	0.831112	-0.266885	-1.20321	26899.5	32365.7	1.00701e-09	2.39961e-08	1.65481	0.726666	1.65481	26899.5	16255.3
PEAK1	pseudopodium enriched atypical kinase 1	PEAK1	PEAK1	protein_coding	0.000231182	0.00151598	0.569017	-0.813457	-1.75742	530.342	932.033	0.691608	0.895795	0.941339	-0.0872144	-1.06232	877.359	932.033	0.00103348	0.00666926	1.65433	0.726243	1.65433	877.359	530.342
SMAD7	SMAD family member 7	SMAD7	SMAD7	protein_coding	0.0799746	0.177414	0.720105	-0.473721	-1.38869	315.102	437.578	0.348648	0.690454	1.19105	0.252238	1.19105	521.178	437.578	0.00729869	0.0340894	1.654	0.725959	1.654	521.178	315.102
FAM234A	family with sequence similarity 234 member A	FAM234A	FAM234A	protein_coding	2.11015e-07	3.0201e-06	0.453727	-1.1401	-2.20397	1467.11	3233.46	0.0575333	0.284409	0.749228	-0.416523	-1.33471	2422.6	3233.46	0.00100325	0.00650155	1.65127	0.72358	1.65127	2422.6	1467.11
TTC3	tetratricopeptide repeat domain 3	TTC3	TTC3	protein_coding	4.44565e-09	8.98048e-08	0.58975	-0.761825	-1.69563	1176.57	1995.03	0.755269	0.922007	0.972503	-0.0402249	-1.02827	1940.17	1995.03	2.94135e-08	5.46188e-07	1.64901	0.7216	1.64901	1940.17	1176.57
DENND4C	DENN domain containing 4C	DENND4C	DENND4C	protein_coding	0.65753	0.779242	0.959572	-0.0595376	-1.04213	2977.92	3103.38	7.97528e-07	4.00127e-05	1.58166	0.661436	1.58166	4908.49	3103.38	7.63891e-08	1.30438e-06	1.64829	0.720974	1.64829	4908.49	2977.92
FDPS	farnesyl diphosphate synthase	FDPS	FDPS	protein_coding	0.00104321	0.00539274	1.40911	0.494785	1.40911	3482.9	2471.7	0.0256068	0.174209	1.26327	0.33716	1.26327	3122.42	2471.7	0.296114	0.514091	0.896499	-0.157626	-1.11545	3122.42	3482.9
TSPYL5	TSPY like 5	TSPYL5	TSPYL5	protein_coding	1.0608e-05	0.000101356	0.446689	-1.16266	-2.23869	434.972	973.769	0.0922889	0.367266	0.735809	-0.442598	-1.35905	716.507	973.769	0.00653125	0.0311051	1.64725	0.720059	1.64725	716.507	434.972
FAAP24	FA core complex associated protein 24	FAAP24	FAAP24	protein_coding	0.00230237	0.010515	1.40885	0.494515	1.40885	377.245	267.768	0.0846863	0.350665	1.216	0.28214	1.216	325.606	267.768	0.19012	0.386478	0.863115	-0.212375	-1.15859	325.606	377.245
SPRED1	sprouty related EVH1 domain containing 1	SPRED1	SPRED1	protein_coding	0.00448481	0.0182098	1.40847	0.494134	1.40847	2084.39	1479.89	0.492339	0.792866	1.08647	0.119646	1.08647	1607.85	1479.89	0.0313803	0.1077	0.771379	-0.374488	-1.29638	1607.85	2084.39
ENSCAFG00000024756	#N/A	ENSCAFG00000024756	---	protein_coding	0.000572053	0.00329408	1.40842	0.494081	1.40842	1056.27	749.97	0.233844	0.581315	1.1264	0.171723	1.1264	844.768	749.97	0.0247985	0.089684	0.799762	-0.322358	-1.25037	844.768	1056.27
UBQLN1	ubiquilin 1	UBQLN1	UBQLN1	protein_coding	0.00411196	0.0169909	1.4081	0.49375	1.4081	3847.4	2732.34	0.32416	0.668683	1.12493	0.169835	1.12493	3073.69	2732.34	0.0598391	0.175809	0.798899	-0.323915	-1.25172	3073.69	3847.4
ZNF74	zinc finger protein 74	ZNF74	ZNF74	protein_coding	0.000210913	0.00140646	0.493478	-1.01894	-2.02643	197.068	399.344	0.272991	0.624225	0.812836	-0.298964	-1.23026	324.601	399.344	0.00917453	0.0410577	1.64716	0.719977	1.64716	324.601	197.068
ENSCAFG00000028484	#N/A	ENSCAFG00000028484	---	protein_coding	0.00390089	0.0162453	1.40768	0.493316	1.40768	237.225	168.522	0.0168304	0.132691	1.33	0.41143	1.33	224.135	168.522	0.629569	0.793952	0.944822	-0.0818856	-1.0584	224.135	237.225
PTCD3	pentatricopeptide repeat domain 3	PTCD3	PTCD3	protein_coding	0.00297012	0.0129967	1.40743	0.493059	1.40743	760.131	540.086	0.0375032	0.221883	1.27136	0.346376	1.27136	686.645	540.086	0.376194	0.593553	0.903325	-0.146683	-1.10702	686.645	760.131
ANKRD12	ankyrin repeat domain 12	ANKRD12	ANKRD12	protein_coding	2.37157e-05	0.000206439	0.487919	-1.03529	-2.04952	4651.14	9532.6	0.196777	0.540801	0.803285	-0.316017	-1.24489	7657.39	9532.6	0.00332716	0.0177513	1.64635	0.71927	1.64635	7657.39	4651.14
PMM2	phosphomannomutase 2	PMM2	PMM2	protein_coding	0.00211806	0.00981293	1.40658	0.49219	1.40658	1373.38	976.399	0.282811	0.634564	1.12709	0.172606	1.12709	1100.49	976.399	0.0461648	0.144692	0.801301	-0.319584	-1.24797	1100.49	1373.38
CLP1	cleavage factor polyribonucleotide kinase subunit 1	CLP1	CLP1	protein_coding	0.00173403	0.00827546	1.40558	0.491169	1.40558	433.708	308.561	0.351518	0.693338	1.1079	0.147831	1.1079	341.856	308.561	0.0290609	0.101481	0.788216	-0.343337	-1.26869	341.856	433.708
PRMT5	protein arginine methyltransferase 5	PRMT5	PRMT5	protein_coding	0.00843671	0.0305676	1.40444	0.489998	1.40444	981.979	699.195	0.10931	0.399194	1.22994	0.298593	1.22994	859.971	699.195	0.303339	0.520624	0.875753	-0.191405	-1.14187	859.971	981.979
TRIM13	tripartite motif containing 13	TRIM13	TRIM13	protein_coding	0.000379488	0.00234054	0.545825	-0.873491	-1.83209	113.736	208.375	0.52227	0.812286	0.898465	-0.154466	-1.11301	187.217	208.375	0.00371291	0.0195225	1.64607	0.719025	1.64607	187.217	113.736
[truncated: 11,129 more rows]

## Sheet: M2 vs M1
Gene symbol	Log2(Ratio) (M2 vs. M1)
CCL13	8.96434
CALD1	8.23554
MS4A2	7.19971
HBEGF	6.92699
CXCL6	6.87437
SELENOP	6.71427
SCN2B	6.63468
NPNT	6.56857
PRSS23	6.52609
THBS1	6.51622
FCER2	6.42997
FLRT2	6.30389
TIMP3	6.18229
[truncated: 37 more rows]

## Sheet: M1 vs M0
Gene symbol	Log2(Ratio) (M1 vs. M0)
[truncated: 50 more rows]

[truncated: 1 more sheets: M2 vs M0]
