# Supplementary material for: Canine polarized macrophages express distinct functional and transcriptomic profiles
Source: Front Vet Sci. 2022 Nov 1;9:988981. doi: 10.3389/fvets.2022.988981 (PMC9663804; doi:10.3389/fvets.2022.988981)
Supplement: Supplemental Table S2 — Gene list of differentially expressed clusters described in Figure 8. For each unique cluster, p-value, FDR adjusted p-value and fold changes are listed for M0, M1, and M2 comparisons. Additional info for each cluster 1 through 6 contains full gene description, protein family, and biological processes associated with each gene. [file Table_2.XLSX]

## Sheet: Cluster1
Gene symbol	Ensembl ID	Gene name	P-value (M1 vs. M0)	FDR step up (M1 vs. M0)	Ratio (M1 vs. M0)	Log2(Ratio) (M1 vs. M0)	Fold change (M1 vs. M0)	LSMean(M1) (M1 vs. M0)	LSMean(M0) (M1 vs. M0)	P-value (M2 vs. M0)	FDR step up (M2 vs. M0)	Ratio (M2 vs. M0)	Log2(Ratio) (M2 vs. M0)	Fold change (M2 vs. M0)	LSMean(M2) (M2 vs. M0)	LSMean(M0) (M2 vs. M0)	P-value (M2 vs. M1)	FDR step up (M2 vs. M1)	Ratio (M2 vs. M1)	Log2(Ratio) (M2 vs. M1)	Fold change (M2 vs. M1)	LSMean(M2) (M2 vs. M1)	LSMean(M1) (M2 vs. M1)
DLA-DMA	DLA-DMA	DLA-DMA	1.27185e-63	1.25341e-60	2.91106	1.54155	2.91106	81969.3	28157.8	7.92405e-10	6.87598e-08	1.47701	0.562677	1.47701	41589.3	28157.8	1.02207e-26	1.12812e-24	0.507377	-0.97887	-1.97092	41589.3	81969.3
INSIG1	INSIG1	INSIG1	1.45877e-61	1.25792e-58	3.42591	1.77649	3.42591	7451.8	2175.13	0.000109951	0.00278348	1.33583	0.417732	1.33583	2905.59	2175.13	7.36356e-37	1.51634e-34	0.389918	-1.35876	-2.56464	2905.59	7451.8
GBP6	GBP6	GBP6	1.42023e-60	1.15264e-57	15.1616	3.92235	15.1616	64030.2	4223.17	1.25394e-11	1.53103e-09	3.06966	1.61808	3.06966	12963.7	4223.17	4.58369e-22	3.55287e-20	0.202462	-2.30428	-4.9392	12963.7	64030.2
WARS1	WARS1	WARS1	9.86796e-36	2.89677e-33	22.7413	4.50724	22.7413	88261.7	3881.12	0.000748867	0.0133146	2.3256	1.2176	2.3256	9025.95	3881.12	8.13177e-20	5.49971e-18	0.102264	-3.28964	-9.77866	9025.95	88261.7
RIC1	RIC1	RIC1	1.501e-34	3.98256e-32	3.3287	1.73496	3.3287	15844.7	4760.03	0.00204381	0.029191	1.35386	0.437077	1.35386	6444.41	4760.03	4.48376e-20	3.10867e-18	0.406723	-1.29788	-2.45867	6444.41	15844.7
GBP1	GBP1	GBP1	3.11357e-31	6.71218e-29	24.7085	4.62694	24.7085	157690	6381.98	0.000374426	0.00751958	2.66809	1.41581	2.66809	17027.7	6381.98	7.03443e-16	3.56816e-14	0.107983	-3.21113	-9.26076	17027.7	157690
LPIN2	LPIN2	LPIN2	9.83311e-27	1.73933e-24	3.766	1.91303	3.766	19196.4	5097.27	5.41494e-05	0.00156794	1.64944	0.721975	1.64944	8407.64	5097.27	2.58361e-11	7.76602e-10	0.437981	-1.19106	-2.2832	8407.64	19196.4
MARK3	MARK3	MARK3	2.61997e-26	4.51847e-24	2.32787	1.21901	2.32787	12831.6	5512.15	0.000840185	0.0144982	1.30515	0.384218	1.30515	7194.19	5512.15	3.57095e-13	1.33881e-11	0.560663	-0.834793	-1.7836	7194.19	12831.6
ENSCAFG00000042877	ENSCAFG00000042877	---	7.20926e-23	9.3836e-21	2.0745	1.05277	2.0745	2935.95	1415.26	7.95925e-05	0.00216595	1.34237	0.42478	1.34237	1899.79	1415.26	3.95611e-09	8.59566e-08	0.647079	-0.627986	-1.54541	1899.79	2935.95
RRAGC	RRAGC	RRAGC	7.14132e-20	6.52508e-18	1.63005	0.704914	1.63005	2886.17	1770.6	0.00131571	0.0204886	1.18963	0.250516	1.18963	2106.37	1770.6	4.04463e-09	8.76041e-08	0.729814	-0.454398	-1.37021	2106.37	2886.17
ENSCAFG00000047557	ENSCAFG00000047557	---	2.24891e-18	1.71427e-16	1.75346	0.810202	1.75346	2452.22	1398.5	9.83016e-06	0.000366559	1.33093	0.412439	1.33093	1861.32	1398.5	1.66987e-05	0.000177631	0.759034	-0.397764	-1.31746	1861.32	2452.22
PSMB9	PSMB9	PSMB9	3.37629e-17	2.20771e-15	2.77735	1.47371	2.77735	14205	5114.57	0.000691287	0.0125002	1.50875	0.593351	1.50875	7716.6	5114.57	4.65056e-07	6.84779e-06	0.543232	-0.880358	-1.84083	7716.6	14205
TGM2	TGM2	TGM2	6.26188e-16	3.45581e-14	13.8083	3.78747	13.8083	32911.4	2383.45	0.00230864	0.0319161	2.69041	1.42782	2.69041	6412.44	2383.45	4.68701e-07	6.8941e-06	0.19484	-2.35964	-5.13243	6412.44	32911.4
ENSCAFG00000032363	ENSCAFG00000032363	---	5.88112e-14	2.53568e-12	4.55535	2.18756	4.55535	16213.7	3559.27	1.44801e-06	6.71056e-05	2.64554	1.40356	2.64554	9416.19	3559.27	0.00706771	0.0332356	0.580754	-0.784001	-1.7219	9416.19	16213.7
JAK2	JAK2	JAK2	2.22563e-13	8.77342e-12	4.10236	2.03645	4.10236	17621.9	4295.56	0.000184522	0.00422198	2.05401	1.03844	2.05401	8823.13	4295.56	0.000322867	0.00244192	0.500691	-0.998008	-1.99724	8823.13	17621.9
PTP4A1	PTP4A1	PTP4A1	2.53017e-13	9.91725e-12	1.5746	0.654987	1.5746	3640.34	2311.91	0.000940781	0.0158292	1.22894	0.297409	1.22894	2841.19	2311.91	6.41785e-05	0.000581399	0.780473	-0.357579	-1.28127	2841.19	3640.34
HSPA9	HSPA9	HSPA9	2.81351e-13	1.09655e-11	2.18372	1.12679	2.18372	6603.64	3024.03	0.00274742	0.0362739	1.37815	0.462734	1.37815	4167.57	3024.03	1.65661e-05	0.000176496	0.631102	-0.664054	-1.58453	4167.57	6603.64
SLAMF8	SLAMF8	SLAMF8	9.2758e-13	3.3155e-11	2.65334	1.40781	2.65334	4629.05	1744.62	0.000427726	0.00834701	1.61934	0.695407	1.61934	2825.13	1744.62	0.000296596	0.00226963	0.610304	-0.7124	-1.63853	2825.13	4629.05
NDUFS1	NDUFS1	NDUFS1	1.15458e-12	4.0637e-11	1.83185	0.873299	1.83185	4682.21	2556	0.000698476	0.0125808	1.33545	0.417322	1.33545	3413.41	2556	0.000202245	0.00162989	0.729016	-0.455977	-1.37171	3413.41	4682.21
IMMT	IMMT	IMMT	1.8589e-12	6.39581e-11	1.53961	0.622565	1.53961	3153.62	2048.32	0.00236093	0.0324764	1.20592	0.270129	1.20592	2470.1	2048.32	6.63621e-05	0.000598821	0.78326	-0.352437	-1.27672	2470.1	3153.62
RBM47	RBM47	RBM47	1.19676e-11	3.66113e-10	2.94774	1.55961	2.94774	5033.68	1707.64	0.000147404	0.00354926	1.83244	0.873767	1.83244	3129.14	1707.64	0.00282937	0.015534	0.621642	-0.685845	-1.60864	3129.14	5033.68
ENSCAFG00000013366	ENSCAFG00000013366	---	4.85756e-11	1.38757e-09	2.23253	1.15868	2.23253	4999.68	2239.47	0.000840658	0.0144982	1.50437	0.589159	1.50437	3368.99	2239.47	0.0012158	0.00765955	0.673842	-0.569518	-1.48403	3368.99	4999.68
TOP1	TOP1	TOP1	2.15994e-10	5.50846e-09	1.60196	0.679842	1.60196	6714.69	4191.54	0.0022053	0.0309493	1.25553	0.328292	1.25553	5262.58	4191.54	0.00102132	0.00660936	0.783742	-0.351549	-1.27593	5262.58	6714.69
VAC14	VAC14	VAC14	3.25309e-10	8.11627e-09	1.55602	0.637864	1.55602	3019.43	1940.48	0.00175844	0.0260593	1.24716	0.318645	1.24716	2420.08	1940.48	0.00164303	0.00988182	0.801504	-0.319218	-1.24765	2420.08	3019.43
CCDC102A	CCDC102A	CCDC102A	5.96304e-10	1.42339e-08	1.63155	0.70624	1.63155	2275.1	1394.45	0.00409707	0.0495419	1.25612	0.328977	1.25612	1751.59	1394.45	0.000931957	0.00608529	0.769897	-0.377263	-1.29888	1751.59	2275.1

## Sheet: Cluster1 info
Gene ID	Gene name	description	Family	Protein Class	Biological Process
CANLF|Ensembl=ENSCAFG00000009058|UniProtKB=F1PUE0	TOP1	DNA topoisomerase I;TOP1;ortholog	DNA TOPOISOMERASE 1 (PTHR10290:SF5)	DNA topoisomerase(PC00017)	DNA replication(GO:0006260);DNA biosynthetic process(GO:0071897);chromosome segregation(GO:0007059);DNA conformation change(GO:0071103)
CANLF|Ensembl=ENSCAFG00000002128|UniProtKB=F1PSG3	RIC1	Protein RIC1 homolog;RIC1;ortholog	GUANINE NUCLEOTIDE EXCHANGE FACTOR SUBUNIT RIC1 (PTHR22746:SF10)		intracellular protein transport(GO:0006886);retrograde transport, endosome to Golgi(GO:0042147)
CANLF|Ensembl=ENSCAFG00000000848|UniProtKB=Q5TJG8	DLA-DMA	MHC class II antigen DM alpha;DLA-DMA;ortholog	HLA CLASS II HISTOCOMPATIBILITY ANTIGEN, DM ALPHA CHAIN (PTHR19944:SF50)	major histocompatibility complex protein(PC00149)	positive regulation of T cell activation(GO:0050870);immunoglobulin mediated immune response(GO:0016064);T cell activation(GO:0042110);cellular protein-containing complex assembly(GO:0034622);antigen processing and presentation(GO:0019882);production of molecular mediator of immune response(GO:0002440);leukocyte cell-cell adhesion(GO:0007159)
CANLF|Ensembl=ENSCAFG00000032363|UniProtKB=A0A5F4BU42	ENSCAFG00000032363	Thioredoxin domain-containing protein;LOC474798;ortholog	THIOREDOXIN (PTHR10438:SF18)	oxidoreductase(PC00176)
CANLF|Ensembl=ENSCAFG00000042877|UniProtKB=A0A5F4BY92	ENSCAFG00000042877	Uncharacterized protein;LOC100684983;ortholog	CYTOCHROME C OXIDASE SUBUNIT 7B, MITOCHONDRIAL (PTHR16716:SF0)	oxidase(PC00175)
CANLF|Ensembl=ENSCAFG00000002102|UniProtKB=A0A5F4BRD0	JAK2	Janus kinase 2;JAK2;ortholog	TYROSINE-PROTEIN KINASE JAK2 (PTHR45807:SF1)	non-receptor tyrosine protein kinase(PC00168)	peptidyl-tyrosine phosphorylation(GO:0018108);cytokine-mediated signaling pathway(GO:0019221);hemopoiesis(GO:0030097);cell differentiation(GO:0030154);intracellular signal transduction(GO:0035556);receptor signaling pathway via JAK-STAT(GO:0007259)
CANLF|Ensembl=ENSCAFG00000005081|UniProtKB=E2RJ47	INSIG1	Insulin-induced gene protein;INSIG1;ortholog	INSULIN-INDUCED GENE 1 PROTEIN (PTHR15301:SF11)		cellular response to insulin stimulus(GO:0032869);maintenance of location in cell(GO:0051651);negative regulation of signal transduction(GO:0009968);signal transduction(GO:0007165);cellular response to lipid(GO:0071396);cholesterol biosynthetic process(GO:0006695);cellular response to stress(GO:0033554);regulation of cellular response to stress(GO:0080135);protein localization to endoplasmic reti…
CANLF|Ensembl=ENSCAFG00000020160|UniProtKB=E2RB06	VAC14	Protein VAC14 homolog;VAC14;ortholog	PROTEIN VAC14 HOMOLOG (PTHR16023:SF0)	scaffold/adaptor protein(PC00226)	positive regulation of kinase activity(GO:0033674);phosphatidylinositol biosynthetic process(GO:0006661);phosphorylation(GO:0016310)
CANLF|Ensembl=ENSCAFG00000008709|UniProtKB=F1PDX3	CCDC102A	Coiled-coil domain containing 102A;CCDC102A;ortholog	COILED-COIL DOMAIN-CONTAINING PROTEIN 102A (PTHR46292:SF3)
CANLF|Ensembl=ENSCAFG00000011795|UniProtKB=F1P7H8	SLAMF8	SLAM family member 8;SLAMF8;ortholog
CANLF|Ensembl=ENSCAFG00000013333|UniProtKB=E2RD75	NDUFS1	NADH-ubiquinone oxidoreductase 75 kDa subunit, mitochondrial;NDUFS1;ortholog	NADH-UBIQUINONE OXIDOREDUCTASE 75 KDA SUBUNIT, MITOCHONDRIAL (PTHR11615:SF6)	dehydrogenase(PC00092)
CANLF|Ensembl=ENSCAFG00000017906|UniProtKB=E2RGG9	WARS1	T1-TrpRS;WARS1;ortholog	TRYPTOPHAN--TRNA LIGASE, CYTOPLASMIC (PTHR10055:SF1)	aminoacyl-tRNA synthetase(PC00047)	cellular amino acid metabolic process(GO:0006520);tRNA metabolic process(GO:0006399);translational elongation(GO:0006414)
CANLF|Ensembl=ENSCAFG00000013366|UniProtKB=A0A5F4BXP3	ENSCAFG00000013366	ATP synthase lipid-binding protein;ATP5MC3;ortholog	ATP SYNTHASE F(0) COMPLEX SUBUNIT C2, MITOCHONDRIAL (PTHR10031:SF32)	ATP synthase(PC00002)	ATP synthesis coupled proton transport(GO:0015986)
CANLF|Ensembl=ENSCAFG00000003196|UniProtKB=E2QY04	RRAGC	Ras related GTP binding C;RRAGC;ortholog	RAS-RELATED GTP-BINDING PROTEIN C (PTHR11259:SF6)	small GTPase(PC00208)	autophagy(GO:0006914);regulation of autophagy(GO:0010506);TOR signaling(GO:0031929);cellular response to starvation(GO:0009267);cellular response to organonitrogen compound(GO:0071417);cellular response to oxygen-containing compound(GO:1901701);positive regulation of TOR signaling(GO:0032008)
CANLF|Ensembl=ENSCAFG00000002490|UniProtKB=A0A5F4CSE7	PTP4A1	TYR_PHOSPHATASE_2 domain-containing protein;PTP4A1;ortholog	PROTEIN TYROSINE PHOSPHATASE TYPE IVA 1 (PTHR23339:SF55)	protein phosphatase(PC00195)
CANLF|Ensembl=ENSCAFG00000001293|UniProtKB=E2RAU5	HSPA9	75 kDa glucose-regulated protein;HSPA9;ortholog	STRESS-70 PROTEIN, MITOCHONDRIAL (PTHR19375:SF184)	Hsp70 family chaperone(PC00027)
CANLF|Ensembl=ENSCAFG00000020200|UniProtKB=E2R9Y4	GBP6	Guanylate binding protein family member 6;GBP6;ortholog	GUANYLATE-BINDING PROTEIN 7 (PTHR10751:SF117)	heterotrimeric G-protein(PC00117)	defense response to Gram-positive bacterium(GO:0050830)
CANLF|Ensembl=ENSCAFG00000007564|UniProtKB=F6Y8P9	IMMT	MICOS complex subunit MIC60;IMMT;ortholog	MICOS COMPLEX SUBUNIT MIC60 (PTHR15415:SF7)
CANLF|Ensembl=ENSCAFG00000018442|UniProtKB=J9NRN1	LPIN2	Phosphatidate phosphatase;LPIN2;ortholog	PHOSPHATIDATE PHOSPHATASE LPIN2 (PTHR12181:SF11)		cellular response to insulin stimulus(GO:0032869);fatty acid catabolic process(GO:0009062);triglyceride biosynthetic process(GO:0019432);transcription by RNA polymerase II(GO:0006366);positive regulation of transcription by RNA polymerase II(GO:0045944)
CANLF|Ensembl=ENSCAFG00000047557|UniProtKB=A0A5F4C0V7	ENSCAFG00000047557	Succinate dehydrogenase [ubiquinone] cytochrome b small subunit;SDHD;ortholog	SUCCINATE DEHYDROGENASE [UBIQUINONE] CYTOCHROME B SMALL SUBUNIT, MITOCHONDRIAL (PTHR13337:SF2)	oxidoreductase(PC00176)	mitochondrial electron transport, succinate to ubiquinone(GO:0006121);tricarboxylic acid cycle(GO:0006099);ATP synthesis coupled proton transport(GO:0015986)
CANLF|Ensembl=ENSCAFG00000030725|UniProtKB=Q5W412	PSMB9	Proteasome subunit beta;PSMB9;ortholog	PROTEASOME SUBUNIT BETA TYPE-9 (PTHR11599:SF50)	protease(PC00190)
CANLF|Ensembl=ENSCAFG00000015898|UniProtKB=A0A5F4DGB0	RBM47	RNA-binding motif protein 47;RBM47;ortholog	RNA-BINDING PROTEIN 47 (PTHR21245:SF6)	RNA metabolism protein(PC00031)
CANLF|Ensembl=ENSCAFG00000020204|UniProtKB=A0A5F4DD09	GBP1	GB1/RHD3-type G domain-containing protein;GBP1;ortholog	GUANYLATE-BINDING PROTEIN 3 (PTHR10751:SF96)	heterotrimeric G-protein(PC00117)
CANLF|Ensembl=ENSCAFG00000018257|UniProtKB=A0A5F4DEK4	MARK3	Non-specific serine/threonine protein kinase;MARK3;ortholog	MAP/MICROTUBULE AFFINITY-REGULATING KINASE 3 (PTHR24346:SF1)	non-receptor serine/threonine protein kinase(PC00167)	intracellular signal transduction(GO:0035556)
CANLF|Ensembl=ENSCAFG00040017744|UniProtKB=Q9XSR3	RBM47	RNA-binding protein 47;RBM47;ortholog	RNA-BINDING PROTEIN 47 (PTHR21245:SF6)	RNA metabolism protein(PC00031)
CANLF|Gene=HSPA9|UniProtKB=P99502	HSPA9	Stress-70 protein, mitochondrial (Fragment);HSPA9;ortholog
CANLF|Ensembl=ENSCAFG00000008869|UniProtKB=A0A5F4D2J2	TGM2	Transglutaminase 2;TGM2;ortholog	PROTEIN-GLUTAMINE GAMMA-GLUTAMYLTRANSFERASE 2 (PTHR11590:SF6)	transferase(PC00220)	cellular protein modification process(GO:0006464)

## Sheet: Cluster 2
Gene symbol	Ensembl ID	Gene name	P-value (M1 vs. M0)	FDR step up (M1 vs. M0)	Ratio (M1 vs. M0)	Log2(Ratio) (M1 vs. M0)	Fold change (M1 vs. M0)	LSMean(M1) (M1 vs. M0)	LSMean(M0) (M1 vs. M0)	P-value (M2 vs. M0)	FDR step up (M2 vs. M0)	Ratio (M2 vs. M0)	Log2(Ratio) (M2 vs. M0)	Fold change (M2 vs. M0)	LSMean(M2) (M2 vs. M0)	LSMean(M0) (M2 vs. M0)	P-value (M2 vs. M1)	FDR step up (M2 vs. M1)	Ratio (M2 vs. M1)	Log2(Ratio) (M2 vs. M1)	Fold change (M2 vs. M1)	LSMean(M2) (M2 vs. M1)	LSMean(M1) (M2 vs. M1)
PRNP	PRNP	PRNP	8.55e-42	3.68e-39	6.03	2.59	6.03	18900	3140	4.9e-08	3.11e-06	0.483	-1.05	-2.07	1520	3140	4.75e-80	7.28e-77	0.0801	-3.64	-12.5	1520	18900
FGD2	FGD2	FGD2	1.45e-19	1.25e-17	2.93	1.55	2.93	9150	3120	6.51e-05	0.00185	0.62	-0.689	-1.61	1930	3120	9.73e-39	2.24e-36	0.211	-2.24	-4.73	1930	9150
GIMAP4	GIMAP4	GIMAP4	7.99e-18	5.51e-16	4.97	2.31	4.97	13500	2720	0.00312	0.0399	0.575	-0.797	-1.74	1570	2720	8.13e-31	1.13e-28	0.116	-3.11	-8.64	1570	13500
CIAO2A	CIAO2A	CIAO2A	2.84e-16	1.62e-14	1.86	0.895	1.86	3940	2120	0.00239	0.0327	0.792	-0.336	-1.26	1680	2120	5.26e-29	6.43e-27	0.426	-1.23	-2.35	1680	3940
TNFSF10	TNFSF10	TNFSF10	3.92e-14	1.74e-12	5.12	2.36	5.12	16500	3230	0.00312	0.0399	0.528	-0.922	-1.9	1700	3230	7.74e-26	7.81e-24	0.103	-3.28	-9.7	1700	16500
FNBP1	FNBP1	FNBP1	4.23e-13	1.59e-11	1.96	0.973	1.96	7320	3730	8.29e-07	4.11e-05	0.63	-0.665	-1.59	2350	3730	5.55e-34	9.94e-32	0.321	-1.64	-3.11	2350	7320
ATP10D	ATP10D	ATP10D	1.03e-12	3.66e-11	2.04	1.03	2.04	6600	3230	1.08e-05	0.000397	0.642	-0.639	-1.56	2080	3230	1.25e-30	1.69e-28	0.315	-1.67	-3.18	2080	6600
GLUL	GLUL	GLUL	9.68e-12	3.01e-10	1.95	0.967	1.95	39700	20300	1.2e-07	6.97e-06	0.594	-0.752	-1.68	12100	20300	1.09e-33	1.88e-31	0.304	-1.72	-3.29	12100	39700
GRINA	GRINA	GRINA	1.07e-09	2.42e-08	1.73	0.79	1.73	5820	3370	0.00328	0.0414	0.767	-0.383	-1.3	2580	3370	1.81e-19	1.2e-17	0.443	-1.17	-2.26	2580	5820
STARD7	STARD7	STARD7	1.93e-07	2.79e-06	1.62	0.692	1.62	6400	3960	0.000685	0.0124	0.73	-0.453	-1.37	2890	3960	8.68e-18	5.03e-16	0.452	-1.14	-2.21	2890	6400
STOM	STOM	STOM	2e-06	2.28e-05	1.77	0.824	1.77	19800	11200	3.23e-05	0.00102	0.607	-0.721	-1.65	6780	11200	5.31e-19	3.36e-17	0.343	-1.55	-2.92	6780	19800
MAPK14	MAPK14	MAPK14	9.64e-05	0.000719	1.21	0.28	1.21	6870	5660	0.000881	0.015	0.847	-0.24	-1.18	4790	5660	5.58e-13	2.04e-11	0.698	-0.52	-1.43	4790	6870
CYP1B1	CYP1B1	CYP1B1	0.000172	0.00118	2.77	1.47	2.77	59600	21500	0.00385	0.0474	0.457	-1.13	-2.19	9840	21500	3e-11	8.95e-10	0.165	-2.6	-6.06	9840	59600
CD38	CD38	CD38	0.00034	0.00212	1.71	0.775	1.71	8570	5010	0.000111	0.0028	0.56	-0.837	-1.79	2800	5010	9.77e-14	3.91e-12	0.327	-1.61	-3.06	2800	8570
IKZF1	IKZF1	IKZF1	0.000956	0.00503	1.59	0.671	1.59	6240	3910	0.00101	0.0167	0.628	-0.67	-1.59	2460	3910	4.49e-11	1.3e-09	0.395	-1.34	-2.53	2460	6240
PGM1	PGM1	PGM1	0.00419	0.0173	1.48	0.567	1.48	4160	2800	0.00219	0.0308	0.656	-0.609	-1.52	1840	2800	3.19e-09	7.11e-08	0.443	-1.18	-2.26	1840	4160
FAM53B	FAM53B	FAM53B	0.0065	0.0248	1.34	0.418	1.34	3130	2340	2.68e-06	0.000116	0.605	-0.725	-1.65	1420	2340	1.32e-13	5.16e-12	0.453	-1.14	-2.21	1420	3130
TMEM106C	TMEM106C	TMEM106C	0.00675	0.0256	1.27	0.347	1.27	8100	6370	7.58e-06	0.000297	0.671	-0.575	-1.49	4280	6370	6.95e-13	2.5e-11	0.528	-0.922	-1.89	4280	8100
CEBPB	CEBPB	CEBPB	0.0111	0.038	1.48	0.57	1.48	13500	9110	0.00307	0.0396	0.63	-0.665	-1.59	5740	9110	3.83e-08	6.97e-07	0.425	-1.24	-2.36	5740	13500

## Sheet: Cluster2 Info
Gene ID	Gene name	description	Family	Protein Class	Biological Process
CANLF|Ensembl=ENSCAFG00000017035|UniProtKB=E2QYL1	CIAO2A	Cytosolic iron-sulfur assembly component 2A;CIAO2A;ortholog	CYTOSOLIC IRON-SULFUR ASSEMBLY COMPONENT 2A (PTHR12377:SF2)
CANLF|Ensembl=ENSCAFG00000001445|UniProtKB=E2RNH4	GRINA	Glutamate ionotropic receptor NMDA type subunit associated protein 1;GRINA;ortholog	PROTEIN LIFEGUARD 1 (PTHR23291:SF16)	ion channel(PC00133)	apoptotic signaling pathway(GO:0097190);negative regulation of apoptotic signaling pathway(GO:2001234)
CANLF|Ensembl=ENSCAFG00000003692|UniProtKB=A0A5F4BRR8	STOM	Stomatin;STOM;ortholog	STOMATIN (PTHR10264:SF115)	cytoskeletal protein(PC00085)
CANLF|Ensembl=ENSCAFG00000013102|UniProtKB=A0A5S6CWM5	GLUL	Glutamine synthetase;GLUL;ortholog	GLUTAMINE SYNTHETASE (PTHR20852:SF45)	ligase(PC00142)	glutamine family amino acid metabolic process(GO:0009064);alpha-amino acid biosynthetic process(GO:1901607)
CANLF|Ensembl=ENSCAFG00000003374|UniProtKB=E2R8G8	IKZF1	IKAROS family zinc finger 1;IKZF1;ortholog	DNA-BINDING PROTEIN IKAROS (PTHR24404:SF36)	C2H2 zinc finger transcription factor(PC00248)	transcription by RNA polymerase II(GO:0006366);regulation of transcription by RNA polymerase II(GO:0006357)
CANLF|Ensembl=ENSCAFG00000006065|UniProtKB=F6PNC8	PRNP	Major prion protein;PRNP;ortholog	MAJOR PRION PROTEIN (PTHR15506:SF3)
CANLF|Ensembl=ENSCAFG00000012752|UniProtKB=A0A5F4C3U7	FAM53B	Family with sequence similarity 53 member B;FAM53B;ortholog	PROTEIN FAM53B (PTHR28567:SF1)		protein import into nucleus(GO:0006606);positive regulation of canonical Wnt signaling pathway(GO:0090263);canonical Wnt signaling pathway(GO:0060070)
CANLF|Ensembl=ENSCAFG00000006790|UniProtKB=F1PW63	STARD7	StAR related lipid transfer domain containing 7;STARD7;ortholog	STAR-RELATED LIPID TRANSFER PROTEIN 7, MITOCHONDRIAL (PTHR19308:SF8)
CANLF|Ensembl=ENSCAFG00000031326|UniProtKB=J9NUL5	CEBPB	CCAAT/enhancer-binding protein;CEBPB;ortholog	CCAAT/ENHANCER-BINDING PROTEIN BETA (PTHR23334:SF21)	basic leucine zipper transcription factor(PC00056)	transcription by RNA polymerase II(GO:0006366);regulation of transcription by RNA polymerase II(GO:0006357)
CANLF|Ensembl=ENSCAFG00000004579|UniProtKB=A0A5F4CNG2	GIMAP4	GTPase, IMAP family member 4;GIMAP4;ortholog	GTPASE IMAP FAMILY MEMBER 4 (PTHR10903:SF170)	small GTPase(PC00208)
CANLF|Ensembl=ENSCAFG00000006164|UniProtKB=E2R329	CYP1B1	Cytochrome P450 family 1 subfamily B member 1;CYP1B1;ortholog	CYTOCHROME P450 1B1 (PTHR24299:SF11)	oxygenase(PC00177)
CANLF|Ensembl=ENSCAFG00000001378|UniProtKB=O02812	MAPK14	Mitogen-activated protein kinase 14;MAPK14;ortholog	MITOGEN-ACTIVATED PROTEIN KINASE 14 (PTHR24055:SF110)	non-receptor serine/threonine protein kinase(PC00167)	intracellular signal transduction(GO:0035556)
CANLF|Ensembl=ENSCAFG00000001903|UniProtKB=A0A5F4CTC1	ATP10D	Phospholipid-transporting ATPase;ATP10D;ortholog	PHOSPHOLIPID-TRANSPORTING ATPASE VD (PTHR24092:SF84)	primary active transporter(PC00068)	phospholipid translocation(GO:0045332)
CANLF|Gene=PRNP|UniProtKB=O46501	PRNP	Major prion protein;PRNP;ortholog	MAJOR PRION PROTEIN (PTHR15506:SF2)
CANLF|Ensembl=ENSCAFG00000018670|UniProtKB=A0A5F4CVL0	PGM1	Phosphoglucomutase 1;PGM1;ortholog	PHOSPHOGLUCOMUTASE 1 (PTHR22573:SF60)	mutase(PC00160)	carbohydrate metabolic process(GO:0005975)
CANLF|Ensembl=ENSCAFG00000015383|UniProtKB=A0A5F4DCJ7	TNFSF10	Tumor necrosis factor ligand superfamily member;TNFSF10;ortholog	TUMOR NECROSIS FACTOR LIGAND SUPERFAMILY MEMBER 10 (PTHR11471:SF27)	intercellular signal molecule(PC00207)
CANLF|Ensembl=ENSCAFG00000009069|UniProtKB=F1PS23	TMEM106C	Transmembrane protein 106C;TMEM106C;ortholog	TRANSMEMBRANE PROTEIN 106C (PTHR28556:SF5)
CANLF|Gene=GLUL|UniProtKB=Q8HZM5	GLUL	Glutamine synthetase;GLUL;ortholog	GLUTAMINE SYNTHETASE (PTHR20852:SF45)	ligase(PC00142)	glutamine family amino acid metabolic process(GO:0009064);alpha-amino acid biosynthetic process(GO:1901607)
CANLF|Ensembl=ENSCAFG00000015298|UniProtKB=J9P988	CD38	2'-phospho-ADP-ribosyl cyclase;CD38;ortholog	ADP-RIBOSYL CYCLASE/CYCLIC ADP-RIBOSE HYDROLASE 1 (PTHR10912:SF5)	cyclase(PC00079)	regulation of B cell proliferation(GO:0030888);positive regulation of lymphocyte activation(GO:0051251);positive regulation of cell population proliferation(GO:0008284);B cell proliferation(GO:0042100)
CANLF|Ensembl=ENSCAFG00000001444|UniProtKB=J9P6H5	FGD2	FYVE, RhoGEF and PH domain containing 2;FGD2;ortholog	FYVE, RHOGEF AND PH DOMAIN-CONTAINING PROTEIN 2 (PTHR12673:SF82)	guanyl-nucleotide exchange factor(PC00113)	cytoskeleton organization(GO:0007010);filopodium assembly(GO:0046847)
CANLF|Ensembl=ENSCAFG00000019963|UniProtKB=A0A5F4CBI4	FNBP1	Formin binding protein 1;FNBP1;ortholog	FORMIN-BINDING PROTEIN 1 (PTHR15735:SF13)	non-motor actin binding protein(PC00165)

## Sheet: Cluster3
Gene symbol	Ensembl ID	Gene name	P-value (M1 vs. M0)	FDR step up (M1 vs. M0)	Ratio (M1 vs. M0)	Log2(Ratio) (M1 vs. M0)	Fold change (M1 vs. M0)	LSMean(M1) (M1 vs. M0)	LSMean(M0) (M1 vs. M0)	P-value (M2 vs. M0)	FDR step up (M2 vs. M0)	Ratio (M2 vs. M0)	Log2(Ratio) (M2 vs. M0)	Fold change (M2 vs. M0)	LSMean(M2) (M2 vs. M0)	LSMean(M0) (M2 vs. M0)	P-value (M2 vs. M1)	FDR step up (M2 vs. M1)	Ratio (M2 vs. M1)	Log2(Ratio) (M2 vs. M1)	Fold change (M2 vs. M1)	LSMean(M2) (M2 vs. M1)	LSMean(M1) (M2 vs. M1)
CIITA	CIITA	CIITA	2.11912e-10	5.42439e-09	2.07907	1.05594	2.07907	10373.1	4989.31	1.00923e-22	4.49173e-20	3.09626	1.63052	3.09626	15448.2	4989.31	0.000536596	0.00378885	1.48925	0.574586	1.48925	15448.2	10373.1
FSCN1	FSCN1	FSCN1	8.73171e-05	0.00065652	2.05338	1.038	2.05338	6853.35	3337.59	2.09889e-11	2.39326e-09	3.41531	1.77202	3.41531	11398.9	3337.59	0.00548846	0.0269482	1.66326	0.734013	1.66326	11398.9	6853.35
CREBL2	CREBL2	CREBL2	0.000257273	0.00166569	1.32823	0.409503	1.32823	1867.17	1405.76	6.03604e-16	1.30124e-13	1.87023	0.903215	1.87023	2629.1	1405.76	9.20139e-06	0.000104144	1.40806	0.493712	1.40806	2629.1	1867.17
HLA-DQB2	HLA-DQB2	HLA-DQB2	0.000924969	0.00489033	1.30778	0.387121	1.30778	69543.7	53176.9	2.16587e-20	7.28843e-18	2.11633	1.08156	2.11633	112540	53176.9	2.80233e-09	6.34872e-08	1.61826	0.694443	1.61826	112540	69543.7
TAX1BP1	TAX1BP1	TAX1BP1	0.00128501	0.00645404	1.17069	0.227365	1.17069	5363.95	4581.86	6.15911e-11	6.48681e-09	1.3769	0.461421	1.3769	6308.74	4581.86	0.000900038	0.00590763	1.17614	0.234056	1.17614	6308.74	5363.95
ACOX1	ACOX1	ACOX1	0.00149153	0.00730777	1.28357	0.360158	1.28357	2022.95	1576.04	1.09674e-20	3.78292e-18	2.07477	1.05295	2.07477	3269.92	1576.04	7.737e-10	1.87605e-08	1.61641	0.69279	1.61641	3269.92	2022.95
VAT1	VAT1	VAT1	0.00167046	0.00802203	1.36878	0.45289	1.36878	5951.37	4347.94	2.09781e-11	2.39326e-09	1.95155	0.964623	1.95155	8485.24	4347.94	0.000375819	0.00277728	1.42576	0.511733	1.42576	8485.24	5951.37
XPNPEP1	XPNPEP1	XPNPEP1	0.00692339	0.0261203	1.37374	0.45811	1.37374	2041.62	1486.17	7.22587e-09	5.47777e-07	1.97256	0.980072	1.97256	2931.57	1486.17	0.00202958	0.0117656	1.43591	0.521962	1.43591	2931.57	2041.62
PLXNA1	PLXNA1	PLXNA1	0.00908425	0.0324535	1.22849	0.29689	1.22849	8498.04	6917.45	2.44082e-07	1.32582e-05	1.5024	0.587271	1.5024	10392.8	6917.45	0.0106649	0.0461554	1.22296	0.290381	1.22296	10392.8	8498.04
MAT2A	MAT2A	MAT2A	0.00943623	0.0335028	1.23479	0.304266	1.23479	6508.81	5271.19	7.01364e-19	2.01598e-16	2.05478	1.03899	2.05478	10831.1	5271.19	3.40408e-10	8.69743e-09	1.66407	0.73472	1.66407	10831.1	6508.81

## Sheet: Cluster3 info
Gene ID	Gene name	description	Family	Protein Class	Biological Process
CANLF|Ensembl=ENSCAFG00000003989|UniProtKB=A0A5F4CUT7	PLXNA1	Plexin A1;PLXNA1;ortholog	PLEXIN-A1 (PTHR22625:SF35)	transmembrane signal receptor(PC00197)	regulation of cell shape(GO:0008360);positive regulation of axonogenesis(GO:0050772);negative regulation of cell adhesion(GO:0007162);regulation of GTPase activity(GO:0043087);axon guidance(GO:0007411);cell adhesion(GO:0007155);cell surface receptor signaling pathway(GO:0007166);regulation of cell migration(GO:0030334);cell migration(GO:0016477)
CANLF|Ensembl=ENSCAFG00000010661|UniProtKB=A0A5F4BY59	XPNPEP1	X-prolyl aminopeptidase 1;XPNPEP1;ortholog	XAA-PRO AMINOPEPTIDASE 1 (PTHR43763:SF6)	protease(PC00190)
CANLF|Ensembl=ENSCAFG00000018931|UniProtKB=A0A5F4CUF5	CIITA	Class II major histocompatibility complex transactivator;CIITA;ortholog	MHC CLASS II TRANSACTIVATOR (PTHR47189:SF1)		inflammatory response(GO:0006954);transcription by RNA polymerase II(GO:0006366);positive regulation of transcription by RNA polymerase II(GO:0045944)
CANLF|Ensembl=ENSCAFG00000016010|UniProtKB=A0A5F4CGS5	FSCN1	Fascin actin-bundling protein 1;FSCN1;ortholog	FASCIN (PTHR10551:SF23)	non-motor actin binding protein(PC00165)	establishment or maintenance of cell polarity(GO:0007163);cell migration(GO:0016477);actin filament bundle assembly(GO:0051017)
CANLF|Ensembl=ENSCAFG00000014620|UniProtKB=F1PAG5	VAT1	Vesicle amine transport 1;VAT1;ortholog	SYNAPTIC VESICLE MEMBRANE PROTEIN VAT-1 HOMOLOG (PTHR44054:SF1)
CANLF|Ensembl=ENSCAFG00000013248|UniProtKB=E2RJZ6	CREBL2	cAMP-responsive element-binding protein-like 2;CREBL2;ortholog	CAMP-RESPONSIVE ELEMENT-BINDING PROTEIN-LIKE 2 (PTHR21051:SF4)		transcription, DNA-templated(GO:0006351);regulation of transcription, DNA-templated(GO:0006355)
CANLF|Ensembl=ENSCAFG00000002995|UniProtKB=E2R009	TAX1BP1	Tax1 binding protein 1;TAX1BP1;ortholog	TAX1-BINDING PROTEIN 1 (PTHR31915:SF8)
CANLF|Ensembl=ENSCAFG00000007755|UniProtKB=E2R431	MAT2A	S-adenosylmethionine synthase;MAT2A;ortholog	S-ADENOSYLMETHIONINE SYNTHASE ISOFORM TYPE-2 (PTHR11964:SF73)	nucleotidyltransferase(PC00174)	sulfur compound metabolic process(GO:0006790);organic substance biosynthetic process(GO:1901576);cellular biosynthetic process(GO:0044249)
CANLF|Ensembl=ENSCAFG00000004989|UniProtKB=A0A5F4CK50	ACOX1	Acyl-coenzyme A oxidase;ACOX1;ortholog	PEROXISOMAL ACYL-COENZYME A OXIDASE 1 (PTHR10909:SF250)	oxidoreductase(PC00176)	fatty acid beta-oxidation(GO:0006635);lipid homeostasis(GO:0055088)

## Sheet: Cluster4
Gene symbol	Ensembl ID	Gene name	P-value (M1 vs. M0)	FDR step up (M1 vs. M0)	Ratio (M1 vs. M0)	Log2(Ratio) (M1 vs. M0)	Fold change (M1 vs. M0)	LSMean(M1) (M1 vs. M0)	LSMean(M0) (M1 vs. M0)	P-value (M2 vs. M0)	FDR step up (M2 vs. M0)	Ratio (M2 vs. M0)	Log2(Ratio) (M2 vs. M0)	Fold change (M2 vs. M0)	LSMean(M2) (M2 vs. M0)	LSMean(M0) (M2 vs. M0)	P-value (M2 vs. M1)	FDR step up (M2 vs. M1)	Ratio (M2 vs. M1)	Log2(Ratio) (M2 vs. M1)	Fold change (M2 vs. M1)	LSMean(M2) (M2 vs. M1)	LSMean(M1) (M2 vs. M1)
ENSCAFG00000005852	ENSCAFG00000005852	---	8.67838e-32	1.96288e-29	0.19674	-2.34564	-5.08286	6202.34	31525.6	2.33711e-24	1.24019e-21	4.09293	2.03313	4.09293	129032	31525.6	3.43886e-106	1.18615e-102	20.8038	4.37877	20.8038	129032	6202.34
ABHD12	ABHD12	ABHD12	5.98375e-10	1.42397e-08	0.439715	-1.18536	-2.2742	3231.76	7349.67	0.00128743	0.020139	1.53155	0.614991	1.53155	11256.4	7349.67	5.25119e-21	3.85376e-19	3.48305	1.80035	3.48305	11256.4	3231.76
PLA2G7	PLA2G7	PLA2G7	4.57685e-09	9.19168e-08	0.615639	-0.699842	-1.62433	10618.8	17248.4	1.35411e-05	0.000485522	1.43278	0.518816	1.43278	24713.1	17248.4	1.82923e-24	1.70527e-22	2.3273	1.21866	2.3273	24713.1	10618.8
SH3KBP1	SH3KBP1	SH3KBP1	1.86193e-08	3.34492e-07	0.587569	-0.767171	-1.70193	3253.02	5536.4	0.0013408	0.0207854	1.35292	0.436081	1.35292	7490.33	5536.4	1.1097e-18	6.83504e-17	2.30258	1.20325	2.30258	7490.33	3253.02
CD9	CD9	CD9	4.49346e-07	6.00157e-06	0.482876	-1.05028	-2.07093	1510.93	3129.01	2.59371e-12	3.34443e-10	2.73231	1.45012	2.73231	8549.43	3129.01	2.56096e-33	4.30897e-31	5.6584	2.50039	5.6584	8549.43	1510.93
ENSCAFG00000023735	ENSCAFG00000023735	---	1.75036e-06	2.02259e-05	0.432988	-1.2076	-2.30953	3716.89	8584.29	0.00380541	0.0469618	1.65892	0.730244	1.65892	14240.6	8584.29	1.69985e-14	7.3751e-13	3.83133	1.93785	3.83133	14240.6	3716.89
LIPA	LIPA	LIPA	1.34417e-05	0.00012455	0.633153	-0.659373	-1.5794	13921.8	21988	0.00163628	0.0245388	1.39165	0.476797	1.39165	30599.6	21988	6.3687e-14	2.58438e-12	2.19797	1.13617	2.19797	30599.6	13921.8
WDR11	WDR11	WDR11	1.70262e-05	0.000153537	0.603204	-0.729283	-1.65781	1586.6	2630.29	4.60742e-06	0.000189192	1.70913	0.773266	1.70913	4495.52	2630.29	7.28003e-19	4.54491e-17	2.83343	1.50255	2.83343	4495.52	1586.6
SRGN	SRGN	SRGN	0.000140774	0.00099603	0.475522	-1.07242	-2.10295	2557.16	5377.58	3.22764e-05	0.00102357	2.24926	1.16945	2.24926	12095.6	5377.58	1.72258e-15	8.42782e-14	4.73009	2.24187	4.73009	12095.6	2557.16
LEPROT	LEPROT	LEPROT	0.000175724	0.00120261	0.740749	-0.432943	-1.34999	4509.95	6088.36	0.00397849	0.0485763	1.25844	0.331632	1.25844	7661.82	6088.36	3.44916e-11	1.01901e-09	1.69887	0.764576	1.69887	7661.82	4509.95
AAK1	AAK1	AAK1	0.000231469	0.00151714	0.720265	-0.473401	-1.38838	2441.1	3389.17	0.000173371	0.00403374	1.39564	0.480928	1.39564	4730.07	3389.17	1.10609e-13	4.4106e-12	1.93768	0.954329	1.93768	4730.07	2441.1
AHR	AHR	AHR	0.000309292	0.001953	0.5601	-0.836244	-1.7854	3219.7	5748.44	4.07956e-05	0.00125358	1.9316	0.949799	1.9316	11103.7	5748.44	1.29077e-14	5.67159e-13	3.44868	1.78604	3.44868	11103.7	3219.7
TASOR	TASOR	TASOR	0.000336699	0.00210964	0.752659	-0.409931	-1.32862	3049.33	4051.41	7.81165e-05	0.00213844	1.36607	0.450034	1.36607	5534.52	4051.41	5.23116e-14	2.13534e-12	1.81499	0.859965	1.81499	5534.52	3049.33
EPS15	EPS15	EPS15	0.00175341	0.00836218	0.73662	-0.441007	-1.35755	3656.65	4964.09	0.00285837	0.0375589	1.33749	0.419531	1.33749	6639.43	4964.09	1.01244e-09	2.40838e-08	1.81572	0.860538	1.81572	6639.43	3656.65
A4GALT	A4GALT	A4GALT	0.00194573	0.00912485	0.50327	-0.990595	-1.987	1614.79	3208.6	2.13547e-06	9.47365e-05	2.85388	1.51292	2.85388	9156.96	3208.6	4.72938e-15	2.19701e-13	5.67067	2.50352	5.67067	9156.96	1614.79
GK5	GK5	GK5	0.00209515	0.00972637	0.665278	-0.587971	-1.50313	1657.42	2491.33	1.96934e-08	1.36538e-06	2.09805	1.06905	2.09805	5226.94	2491.33	3.90717e-18	2.32359e-16	3.15365	1.65702	3.15365	5226.94	1657.42
SEMA7A	SEMA7A	SEMA7A	0.00210037	0.00974592	0.610526	-0.711875	-1.63793	7507.06	12296	0.000169236	0.00396046	1.82769	0.870023	1.82769	22473.4	12296	8.19504e-12	2.59924e-10	2.99363	1.5819	2.99363	22473.4	7507.06
CSF2RB	CSF2RB	CSF2RB	0.0033865	0.0144589	0.543597	-0.879391	-1.8396	16624	30581.5	0.00101798	0.0168205	1.98046	0.985838	1.98046	60565.4	30581.5	5.12968e-10	1.27751e-08	3.64326	1.86523	3.64326	60565.4	16624
ENSCAFG00000041196	ENSCAFG00000041196	---	0.00518629	0.0205914	0.71887	-0.476197	-1.39107	2440.18	3394.46	6.12262e-23	2.91289e-20	3.19107	1.67404	3.19107	10832	3394.46	1.23395e-36	2.50364e-34	4.43901	2.15024	4.43901	10832	2440.18
PGRMC1	PGRMC1	PGRMC1	0.00747752	0.0277034	0.729534	-0.454953	-1.37074	2353.61	3226.18	1.1775e-05	0.000430926	1.67396	0.743267	1.67396	5400.51	3226.18	1.78009e-12	6.03436e-11	2.29456	1.19822	2.29456	5400.51	2353.61
PRDM1	PRDM1	PRDM1	0.00749024	0.0277306	0.601371	-0.733672	-1.66287	3288.22	5467.88	0.00126288	0.0198225	1.8452	0.883774	1.8452	10089.3	5467.88	3.70734e-09	8.11907e-08	3.06831	1.61745	3.06831	10089.3	3288.22
PIK3CB	PIK3CB	PIK3CB	0.00781652	0.0287585	0.650079	-0.621313	-1.53827	2564.61	3945.07	4.79972e-05	0.00140897	1.92929	0.948071	1.92929	7611.19	3945.07	1.79529e-11	5.49217e-10	2.96778	1.56938	2.96778	7611.19	2564.61
NIBAN1	NIBAN1	NIBAN1	0.00809219	0.029519	0.728946	-0.456115	-1.37184	3375.05	4630.03	6.61309e-22	2.60688e-19	3.14448	1.65282	3.14448	14559	4630.03	1.53018e-34	2.81491e-32	4.31373	2.10894	4.31373	14559	3375.05
CHSY1	CHSY1	CHSY1	0.00960608	0.0339746	0.787399	-0.344833	-1.27	1738.2	2207.51	3.84414e-07	2.03507e-05	1.59372	0.672401	1.59372	3518.17	2207.51	1.95111e-14	8.41233e-13	2.02403	1.01723	2.02403	3518.17	1738.2

## Sheet: Cluster4 Info
Gene ID	Gene name	description	Family	Protein Class	Biological Process
CANLF|Ensembl=ENSCAFG00000008083|UniProtKB=J9P0V1	TASOR	Transcription activation suppressor;TASOR;ortholog	PROTEIN TASOR (PTHR16207:SF1)		regulation of chromosome organization(GO:0033044);heterochromatin assembly(GO:0031507);positive regulation of cellular component biogenesis(GO:0044089);positive regulation of organelle organization(GO:0010638);regulation of chromatin assembly(GO:0010847);gene expression(GO:0010467);protein localization to organelle(GO:0033365);DNA metabolic process(GO:0006259);macromolecule methylation(GO:0043414)
CANLF|Ensembl=ENSCAFG00000013817|UniProtKB=F6V440	SRGN	Serglycin (Fragment);SRGN;ortholog	SERGLYCIN (PTHR17178:SF0)
CANLF|Ensembl=ENSCAFG00000007579|UniProtKB=F6Y841	PIK3CB	Phosphatidylinositol-4,5-bisphosphate 3-kinase;PIK3CB;ortholog	PHOSPHATIDYLINOSITOL 4,5-BISPHOSPHATE 3-KINASE CATALYTIC SUBUNIT BETA ISOFORM (PTHR10048:SF33)	kinase(PC00137)	phosphatidylinositol 3-kinase signaling(GO:0014065);phosphatidylinositol phosphate biosynthetic process(GO:0046854);cell migration(GO:0016477)
CANLF|Ensembl=ENSCAFG00000017916|UniProtKB=F1P8T3	SEMA7A	Semaphorin 7A;SEMA7A;ortholog	SEMAPHORIN-7A (PTHR11036:SF80)	membrane-bound signaling molecule(PC00152)	negative regulation of locomotion(GO:0040013);axon guidance(GO:0007411);immune effector process(GO:0002252);production of molecular mediator of immune response(GO:0002440);ERK1 and ERK2 cascade(GO:0070371);inflammatory response(GO:0006954);integrin-mediated signaling pathway(GO:0007229);positive regulation of cell growth(GO:0030307);positive regulation of immune effector process(GO:0002699);immun…
CANLF|Ensembl=ENSCAFG00000002037|UniProtKB=A0A5F4CWA2	PLA2G7	1-alkyl-2-acetylglycerophosphocholine esterase;PLA2G7;ortholog	PLATELET-ACTIVATING FACTOR ACETYLHYDROLASE (PTHR10272:SF12)	protein modifying enzyme(PC00260)
CANLF|Ensembl=ENSCAFG00030006390|UniProtKB=Q28262	PLA2G7	Platelet-activating factor acetylhydrolase;PLA2G7;ortholog	PLATELET-ACTIVATING FACTOR ACETYLHYDROLASE (PTHR10272:SF12)	protein modifying enzyme(PC00260)
CANLF|Ensembl=ENSCAFG00000003309|UniProtKB=A0A5F4C6G7	AAK1	AP2 associated kinase 1;AAK1;ortholog	AP2 ASSOCIATED KINASE 1 (PTHR47907:SF2)
CANLF|Ensembl=ENSCAFG00000015172|UniProtKB=A0A5F4CHF8	CD9	Tetraspanin;CD9;ortholog	CD9 ANTIGEN (PTHR19282:SF163)	scaffold/adaptor protein(PC00226)
CANLF|Ensembl=ENSCAFG00000010579|UniProtKB=E2QWQ7	CHSY1	Hexosyltransferase;CHSY1;ortholog	CHONDROITIN SULFATE SYNTHASE 1 (PTHR12369:SF42)	glycosyltransferase(PC00111)	chondroitin sulfate proteoglycan biosynthetic process(GO:0050650);glycosaminoglycan biosynthetic process(GO:0006024);chondroitin sulfate metabolic process(GO:0030204)
CANLF|Ensembl=ENSCAFG00000015721|UniProtKB=E2QXS1	LIPA	Lipase A, lysosomal acid type;LIPA;ortholog	LYSOSOMAL ACID LIPASE/CHOLESTERYL ESTER HYDROLASE (PTHR11005:SF26)	lipase(PC00143)
CANLF|Ensembl=ENSCAFG00000013490|UniProtKB=J9NZV5	NIBAN1	Niban apoptosis regulator 1;NIBAN1;ortholog	PROTEIN NIBAN 1 (PTHR14392:SF3)
CANLF|Ensembl=ENSCAFG00000023735|UniProtKB=F1PZ60	ENSCAFG00000023735	Ig-like domain-containing protein;unassigned;ortholog	T-CELL SURFACE GLYCOPROTEIN CD1A (PTHR16675:SF160)	major histocompatibility complex protein(PC00149)	T cell mediated immunity(GO:0002456);positive regulation of adaptive immune response(GO:0002821);positive regulation of cellular process(GO:0048522);antigen processing and presentation(GO:0019882);positive regulation of lymphocyte mediated immunity(GO:0002708);cellular process(GO:0009987)
CANLF|Ensembl=ENSCAFG00000012327|UniProtKB=F1PUH1	WDR11	WD repeat domain 11;WDR11;ortholog	WD REPEAT-CONTAINING PROTEIN 11 (PTHR14593:SF5)
CANLF|Ensembl=ENSCAFG00000031524|UniProtKB=A0A5F4CUF8	LEPROT	Leptin receptor overlapping transcript;LEPROT;ortholog	LEPTIN RECEPTOR GENE-RELATED PROTEIN (PTHR12050:SF3)	transmembrane signal receptor(PC00197)	negative regulation of signal transduction(GO:0009968);cellular response to peptide hormone stimulus(GO:0071375);transmembrane receptor protein tyrosine kinase signaling pathway(GO:0007169);late endosome to vacuole transport via multivesicular body sorting pathway(GO:0032511)
CANLF|Ensembl=ENSCAFG00000003694|UniProtKB=F1PFR8	PRDM1	PR domain zinc finger protein 1;PRDM1;ortholog	PR DOMAIN ZINC FINGER PROTEIN 1 (PTHR16515:SF26)	C2H2 zinc finger transcription factor(PC00248)
CANLF|Ensembl=ENSCAFG00000003871|UniProtKB=F1PAM9	EPS15	Epidermal growth factor receptor pathway substrate 15;EPS15;ortholog	EPIDERMAL GROWTH FACTOR RECEPTOR SUBSTRATE 15 (PTHR11216:SF54)	membrane traffic protein(PC00150)	vesicle budding from membrane(GO:0006900);endosomal transport(GO:0016197);membrane invagination(GO:0010324);endocytosis(GO:0006897)
CANLF|Ensembl=ENSCAFG00000001519|UniProtKB=E2RIM5	CSF2RB	Colony stimulating factor 2 receptor subunit beta;CSF2RB;ortholog	CYTOKINE RECEPTOR COMMON SUBUNIT BETA (PTHR23037:SF22)	transmembrane signal receptor(PC00197)	cytokine-mediated signaling pathway(GO:0019221);immunoglobulin mediated immune response(GO:0016064)
CANLF|Ensembl=ENSCAFG00000000946|UniProtKB=F1PS29	A4GALT	Alpha-1,4-N-acetylglucosaminyltransferase;A4GALT;ortholog	LACTOSYLCERAMIDE 4-ALPHA-GALACTOSYLTRANSFERASE (PTHR12042:SF17)	transferase(PC00220)	protein O-linked glycosylation(GO:0006493);glycosphingolipid biosynthetic process(GO:0006688)
CANLF|Ensembl=ENSCAFG00000018372|UniProtKB=E2RJW8	PGRMC1	Progesterone receptor membrane component 1;PGRMC1;ortholog	MEMBRANE-ASSOCIATED PROGESTERONE RECEPTOR COMPONENT 1 (PTHR10281:SF23)	transmembrane signal receptor(PC00197)
CANLF|Ensembl=ENSCAFG00000007753|UniProtKB=E2R7X3	GK5	ATP:glycerol 3-phosphotransferase 5;GK5;ortholog	GLYCEROL KINASE 5-RELATED (PTHR10196:SF68)	carbohydrate kinase(PC00065)	glycerol-3-phosphate metabolic process(GO:0006072);cellular carbohydrate metabolic process(GO:0044262);triglyceride metabolic process(GO:0006641);alcohol metabolic process(GO:0006066);carbohydrate derivative biosynthetic process(GO:1901137);organophosphate biosynthetic process(GO:0090407)
CANLF|Ensembl=ENSCAFG00000004389|UniProtKB=E2RJG6	ABHD12	2-arachidonoylglycerol hydrolase ABHD12;ABHD12;ortholog	LYSOPHOSPHATIDYLSERINE LIPASE ABHD12 (PTHR12277:SF61)	serine protease(PC00203)	acylglycerol catabolic process(GO:0046464);glycerophospholipid catabolic process(GO:0046475);organonitrogen compound catabolic process(GO:1901565);cellular modified amino acid metabolic process(GO:0006575)
CANLF|Ensembl=ENSCAFG00000002448|UniProtKB=A0A5F4CFW8	AHR	Aryl hydrocarbon receptor;AHR;ortholog	ARYL HYDROCARBON RECEPTOR (PTHR10649:SF9)	basic helix-loop-helix transcription factor(PC00055)	transcription by RNA polymerase II(GO:0006366);regulation of transcription by RNA polymerase II(GO:0006357)
CANLF|Ensembl=ENSCAFG00000013075|UniProtKB=A0A5F4D1N6	SH3KBP1	SH3 domain containing kinase binding protein 1;SH3KBP1;ortholog	SH3 DOMAIN-CONTAINING KINASE-BINDING PROTEIN 1 (PTHR14167:SF6)	scaffold/adaptor protein(PC00226)

## Sheet: cluster5
Gene symbol	Ensembl ID	Gene name	P-value (M1 vs. M0)	FDR step up (M1 vs. M0)	Ratio (M1 vs. M0)	Log2(Ratio) (M1 vs. M0)	Fold change (M1 vs. M0)	LSMean(M1) (M1 vs. M0)	LSMean(M0) (M1 vs. M0)	P-value (M2 vs. M0)	FDR step up (M2 vs. M0)	Ratio (M2 vs. M0)	Log2(Ratio) (M2 vs. M0)	Fold change (M2 vs. M0)	LSMean(M2) (M2 vs. M0)	LSMean(M0) (M2 vs. M0)	P-value (M2 vs. M1)	FDR step up (M2 vs. M1)	Ratio (M2 vs. M1)	Log2(Ratio) (M2 vs. M1)	Fold change (M2 vs. M1)	LSMean(M2) (M2 vs. M1)	LSMean(M1) (M2 vs. M1)
LY9	LY9	LY9	6.15177e-05	0.000481703	0.539487	-0.890341	-1.85361	4096.74	7593.78	7.60484e-20	2.49819e-17	0.244619	-2.03139	-4.08798	1857.59	7593.78	3.08429e-07	4.70729e-06	0.45343	-1.14105	-2.20541	1857.59	4096.74
MT2A	MT2A	MT2A	6.23341e-05	0.000487266	0.490309	-1.02824	-2.03953	2928.85	5973.48	2.79973e-13	4.19868e-11	0.27185	-1.87912	-3.6785	1623.89	5973.48	0.000952534	0.00621376	0.554446	-0.85088	-1.8036	1623.89	2928.85
APBB1IP	APBB1IP	APBB1IP	0.000101612	0.000750504	0.763026	-0.390196	-1.31057	3185.96	4175.43	1.02165e-10	1.02889e-08	0.636823	-0.651035	-1.57029	2659.01	4175.43	0.00984577	0.0433862	0.834602	-0.260839	-1.19818	2659.01	3185.96
MICAL1	MICAL1	MICAL1	0.00243479	0.011014	0.747082	-0.420662	-1.33854	3901.99	5222.98	1.76895e-13	2.7118e-11	0.491321	-1.02526	-2.03533	2566.16	5222.98	1.44382e-05	0.000155507	0.657653	-0.604601	-1.52056	2566.16	3901.99

## Sheet: Cluster5 Info
Gene ID	Gene name	description	Family	Protein Class	Biological Process
CANLF|Ensembl=ENSCAFG00030004211|UniProtKB=Q9XST5	MT2A	Metallothionein-2;MT2A;ortholog	METALLOTHIONEIN-2 (PTHR23299:SF22)	defense/immunity protein(PC00090)
CANLF|Ensembl=ENSCAFG00000004329|UniProtKB=E2RPD3	APBB1IP	Amyloid beta precursor protein binding family B member 1 interacting protein;APBB1IP;ortholog	AMYLOID BETA A4 PRECURSOR PROTEIN-BINDING FAMILY B MEMBER 1-INTERACTING PROTEIN (PTHR11243:SF14)	scaffold/adaptor protein(PC00226)
CANLF|Ensembl=ENSCAFG00000012621|UniProtKB=E2RDP3	LY9	Lymphocyte antigen 9;LY9;ortholog	T-LYMPHOCYTE SURFACE ANTIGEN LY-9 (PTHR12080:SF55)	immunoglobulin receptor superfamily(PC00124)
CANLF|Ensembl=ENSCAFG00000023759|UniProtKB=A0A5S6CJ30	MT2A	Metallothionein-2;MT2A;ortholog	METALLOTHIONEIN-2 (PTHR23299:SF22)	defense/immunity protein(PC00090)
CANLF|Ensembl=ENSCAFG00000003824|UniProtKB=A0A5F4DH95	MICAL1	F-actin monooxygenase;MICAL1;ortholog	[F-ACTIN]-MONOOXYGENASE MICAL1 (PTHR24206:SF59)	actin or actin-binding cytoskeletal protein(PC00041)	actin filament bundle assembly(GO:0051017)

[truncated: 2 more sheets: Cluster6, Cluster6 info]
